# Supplementary material
Source: PubMed Central journal article supplement (PMC3315110)

## Supporting Information

### **Rhodium-catalyzed Intra- and Intermolecular [5+2] Cycloaddition of 3-Acyloxy-1,4-enyne and Alkyne with Concomitant 1,2-Acyloxy Migration**

Xing-Zhong Shu,<sup>a</sup> Xiaoxun Li,<sup>a</sup> Dongxu Shu,<sup>b</sup> Suyu Huang,<sup>a,†</sup> Casi M. Schienebeck,<sup>a</sup> Xin Zhou,<sup>a</sup> Patrick J. Robichaux,<sup>b</sup> and Weiping Tang<sup>a,\*</sup>

<sup>a</sup> School of Pharmacy and <sup>b</sup>Department of Chemistry, University of Wisconsin, Madison, WI 53705

E-mail: wtang@pharmacy.wisc.edu

## Table of Contents

|                                                                                                               |            |
|---------------------------------------------------------------------------------------------------------------|------------|
| <b>1. Procedures for the preparation of substrates and their characterization data</b>                        |            |
| 1a-1c.....                                                                                                    | S3         |
| 1d.....                                                                                                       | S4         |
| 1e and 1i.....                                                                                                | S5         |
| 1f.....                                                                                                       | S6         |
| 1g.....                                                                                                       | S7         |
| 1h, 1j, and 1k.....                                                                                           | S8         |
| 1l.....                                                                                                       | S9         |
| 1m.....                                                                                                       | S10        |
| 1n.....                                                                                                       | S11        |
| 1o.....                                                                                                       | S12        |
| 1t, 1x, and 1z.....                                                                                           | S13        |
| 1u, 1v, 1w, and 1y.....                                                                                       | S14        |
| 1aa.....                                                                                                      | S16        |
| 1ab.....                                                                                                      | S18        |
| 3a, 3b, 3c, and 3k.....                                                                                       | S19        |
| 3d, 3h, 3l, 3m, and 3n.....                                                                                   | S20        |
| 3e, 3f, and 3g.....                                                                                           | S22        |
| 3j.....                                                                                                       | S23        |
| 3p.....                                                                                                       | S24        |
| <b>2. Procedures for the hydrolysis of product 2b to dienone 18 and the characterization data of 18.....</b>  | <b>S25</b> |
| <b>3. Procedures for the conversion of product 5g to compound 24 and the characterization data of 24.....</b> | <b>S25</b> |
| <b>4. Characterization data for products derived from intramolecular reactions</b>                            |            |
| 2a-2g.....                                                                                                    | S27        |
| 2h-2o.....                                                                                                    | S29        |
| 2t-2ab.....                                                                                                   | S31        |
| <b>5. Characterization data for products derived from intermolecular reactions</b>                            |            |
| 5a-5aa.....                                                                                                   | S35        |
| 19b-19k.....                                                                                                  | S44        |
| 21a, 21b, 22, and 23.....                                                                                     | S47        |
| <b>6. References.....</b>                                                                                     | <b>S49</b> |
| <b>7. Copies of proton and carbon NMR spectra.....</b>                                                        | <b>S50</b> |

## Procedures for the preparation of substrates and their characterization data

Preparation of substrates **1a**, **1b**, and **1c**.

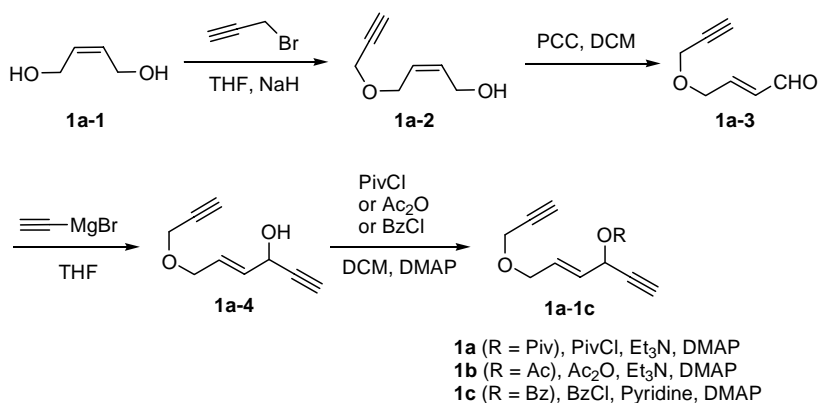

To a suspension of PCC (1.94 g, 9 mmol) and 4 Å MS (300 mg, 50mg/mmol) in CH<sub>2</sub>Cl<sub>2</sub> (60 mL) was added a solution of known compound **1a-2**<sup>1</sup> (6 mmol) in dry CH<sub>2</sub>Cl<sub>2</sub> (10 mL) at 0 °C under Ar. The mixture was stirred at room temperature for 1.5 h. It was then poured into Et<sub>2</sub>O (70 mL). The mixed solution was filtered through silica gel and the filtrate was concentrated under reduced pressure to yield the crude aldehyde for next step without purification.

To a stirred solution of ethynylmagnesium bromide solution (12 mL, 1.2 equiv, 0.5 M in THF) was added a solution of crude aldehyde (5 mmol) in THF (20 mL) at room temperature. When the reaction was completed as determined by TLC analysis, the reaction mixture was quenched by addition of saturated aqueous ammonium chloride (40 mL) and extracted with ethyl ether (2×40 mL). The combined organic layers were washed with H<sub>2</sub>O, brine, dried over anhydrous Na<sub>2</sub>SO<sub>4</sub>, and concentrated under reduced pressure to give the crude propargylic alcohol **1a-4** for the next step without purification.

To a stirred solution of crude propargylic alcohol **1a-4** (4.6 mmol) in CH<sub>2</sub>Cl<sub>2</sub> (40 mL) was added triethylamine (1.39 g, 13.8 mmol, 3.0 equiv), pivaloyl chloride (662 mg, 5.52 mmol, 1.2 equiv), and DMAP (5 mol %) at room temperature. The resulting mixture was stirred overnight, diluted with CH<sub>2</sub>Cl<sub>2</sub> (40 mL), washed with water, brine, and dried over anhydrous Na<sub>2</sub>SO<sub>4</sub>. After removing the solvent under reduced pressure, the residue was purified by flash column chromatography (silica gel, hexane/ethyl acetate 20:1) to obtain the desired propargylic esters **1a** (940 mg) as an oil in 67% yield over 3 steps.

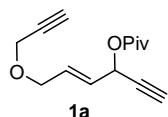

(*E*)-6-(prop-2-ynyloxy)hex-4-en-1-yn-3-yl pivalate (**1a**).

Oil. (940 mg) <sup>1</sup>H NMR (400 MHz, CDCl<sub>3</sub>): δ 1.22 (s, 9 H), 2.44 (t, *J* = 2.4 Hz, 1 H), 2.58 (d, *J* = 2.0 Hz, 1 H), 4.13 (td, *J* = 1.2, 5.2 Hz, 2 H), 4.17 (d, *J* = 2.4 Hz, 2 H), 5.79-5.87 (m, 2 H), 6.08 (dtd, *J* = 0.8, 5.6, 15.2 Hz, 1 H). <sup>13</sup>C NMR (100 MHz, CDCl<sub>3</sub>):

$\delta$  26.9, 38.7, 57.4, 62.9, 68.7, 74.6, 74.8, 79.3, 79.4, 127.4, 130.5, 177.0. IR (film):  $\nu$  964, 1140, 1273, 1718, 2973, 3293  $\text{cm}^{-1}$ . HRMS (ESI)  $m/z$  calcd. For  $\text{C}_{14}\text{H}_{18}\text{O}_3$   $(\text{M}+\text{Na})^+$  257.1148, found 257.1154.

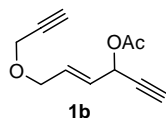

(*E*)-6-(prop-2-ynoxy)hex-4-en-1-yn-3-yl acetate (**1b**).

Compound **1b** (721 mg) was prepared from alcohol **1a-2** (6 mmol) in 63% yield over 3 steps.  $\text{Ac}_2\text{O}$  (1.2 equiv),  $\text{Et}_3\text{N}$  (3 equiv), and DMAP (5%) were used for esterification. (silica gel, hexane/ethyl acetate 10:1), oil.  $^1\text{H}$  NMR (400 MHz,  $\text{CDCl}_3$ ):  $\delta$  2.09 (s, 3 H), 2.44 (t,  $J = 2.4$  Hz, 1 H), 2.57 (d,  $J = 2.4$  Hz, 1 H), 4.13 (ddd,  $J = 1.2, 1.6, 5.2$  Hz, 2 H), 4.17 (d,  $J = 2.4$  Hz, 2 H), 5.80-5.89 (m, 2 H), 6.06-6.12 (m, 1 H).  $^{13}\text{C}$  NMR (100 MHz,  $\text{CDCl}_3$ ):  $\delta$  20.9, 57.4, 63.1, 68.6, 74.7, 75.2, 79.1, 79.3, 126.9, 131.2, 169.5. IR (film):  $\nu$  701, 965, 1082, 1371, 2855, 3292  $\text{cm}^{-1}$ . HRMS (ESI)  $m/z$  calcd. For  $\text{C}_{11}\text{H}_{12}\text{O}_3$   $(\text{M}+\text{Na})^+$  215.0678, found 215.0680.

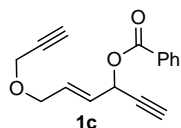

(*E*)-6-(prop-2-ynoxy)hex-4-en-1-yn-3-yl benzoate (**1c**).

Compound **1c** (920 mg) was prepared from alcohol **1a-2** (6 mmol) in 61% yield over 3 steps.  $\text{BzCl}$  (1.1 equiv), pyridine (3 equiv), DMAP (5%) were used for esterification. (silica gel, hexane/ethyl acetate 10:1), oil.  $^1\text{H}$  NMR (400 MHz,  $\text{CDCl}_3$ ):  $\delta$  2.45 (t,  $J = 2.4$  Hz, 1 H), 2.62 (d,  $J = 2.4$  Hz, 1 H), 4.15 (td,  $J = 1.6, 5.2$  Hz, 2 H), 4.18 (d,  $J = 2.4$  Hz, 2 H), 5.97 (tdd,  $J = 1.6, 5.6, 15.6$  Hz, 1 H), 6.14-6.23 (m, 2 H), 7.42-7.47 (m, 2 H), 7.55-7.60 (m, 1 H), 8.06-8.09 (m, 2 H).  $^{13}\text{C}$  NMR (100 MHz,  $\text{CDCl}_3$ ):  $\delta$  57.5, 63.7, 68.7, 74.7, 75.4, 79.1, 79.3, 127.1, 128.4, 129.5, 129.8, 131.2, 133.3, 165.2. IR (film):  $\nu$  713, 932, 1105, 1257, 1717, 3293  $\text{cm}^{-1}$ . HRMS (ESI)  $m/z$  calcd. For  $\text{C}_{16}\text{H}_{14}\text{O}_3$   $(\text{M}+\text{Na})^+$  277.0835, found 277.0841.

Preparation of substrate **1d**.

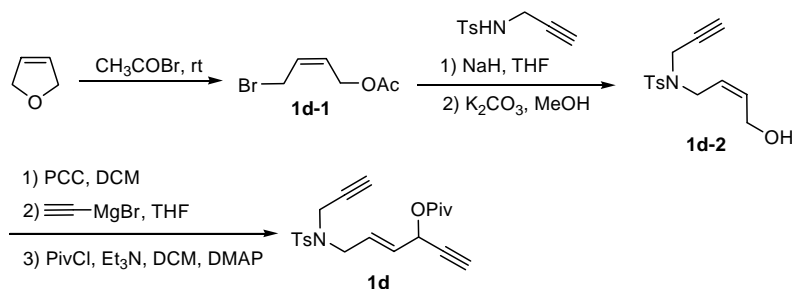

To a stirred solution of NaH (390 mg, 9.6 mmol, 60% in mineral oil) in THF (40 mL) was added sulfonamide (1.58 g, 8 mmol) at 0 °C under argon atmosphere. After stirring at rt for 0.5 h, known compound **1d-1**<sup>2</sup> (1.69 g, 8.8 mmol) in THF (10 mL) was added. The reaction mixture was allowed to stir overnight. The reaction was quenched with

H<sub>2</sub>O. The mixture was diluted with ethyl acetate, washed with H<sub>2</sub>O, brine, dried over anhydrous Na<sub>2</sub>SO<sub>4</sub>, and concentrated under reduced pressure. The residue was dissolved with methanol (50 mL), and K<sub>2</sub>CO<sub>3</sub> (4.4 g, 32 mmol) was added at room temperature. After stirring at room temperature for 1 h, most of solvent was removed under reduced pressure. The residue was diluted with ethyl acetate (70 mL), washed with H<sub>2</sub>O, brine, dried over anhydrous Na<sub>2</sub>SO<sub>4</sub>, and concentrated in vacuo. The residue was purified by column chromatography (silica gel, hexane/ethyl acetate 4:1) to afford **1d-2** (1.9 g) in 79% yield over 2 steps. Product **1d** (1.57 g) was obtained in 68% yield over three steps from **1d-2** according to procedures described for **1a**.

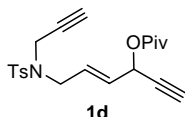

(*E*)-6-(*N*-(prop-2-ynyl)-*N*-tosylamino)hex-4-en-1-yn-3-yl pivalate (**1d**).

(silica gel, hexane/ethyl acetate 10:1), oil. (1.57 g) <sup>1</sup>H NMR (400 MHz, CDCl<sub>3</sub>): δ 1.21 (s, 9 H), 2.03 (t, *J* = 2.4 Hz, 1 H), 2.43 (s, 3 H), 2.55 (d, *J* = 2.0 Hz, 1 H), 3.83-3.93 (m, 2 H), 4.02-4.13 (m, 2 H), 5.76-5.84 (m, 2 H), 5.88-5.93 (m, 1 H), 7.28-7.31 (m, 2 H), 7.71-7.74 (m, 2 H). <sup>13</sup>C NMR (100 MHz, CDCl<sub>3</sub>): δ 21.4, 26.9, 35.9, 38.6, 47.3, 62.6, 73.9, 75.0, 76.2, 78.9, 127.7, 128.5, 129.5, 129.8, 135.7, 143.6, 176.8. IR (film): ν 742, 1091, 1159, 1348, 1733, 2974, 3290 cm<sup>-1</sup>. HRMS (ESI) *m/z* calcd. For C<sub>21</sub>H<sub>25</sub>NO<sub>4</sub>S (M+Na)<sup>+</sup> 410.1396, found 410.1398.

Preparation of substrate **1e** and **1i**.

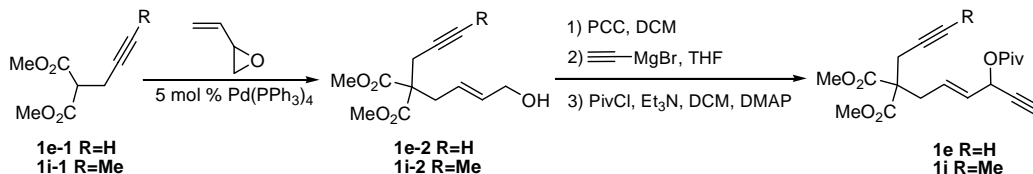

Compounds **1e-2** (1.13 g, 83% yield) and **1i-2** (1.62 g, 88% yield) were prepared in one step from corresponding malonates and vinyl epoxide according to the literature procedure.<sup>3</sup>

Products **1e** and **1i** were obtained in three steps from **1e-2** and **1i-2** respectively according to procedures described for **1a**.

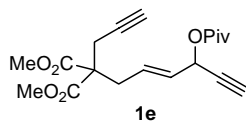

(*E*)-dimethyl 2-(4-(pivaloyloxy)hex-2-en-5-ynyl)-2-(prop-2-ynyl)malonate (**1e**).

Compound **1e** (980 mg) was prepared in 71% yield over 3 steps from **1e-2**. (silica gel, hexane/ethyl acetate 10:1), oil. <sup>1</sup>H NMR (400Mz, CDCl<sub>3</sub>) δ 1.19 (s, 9H), 2.02 (t, *J* = 2.8 Hz, 1H), 2.51 (d, *J* = 2.0 Hz, 1H), 2.77 (d, *J* = 2.8 Hz, 2H), 2.82 (dd, *J* = 0.8, 7.6 Hz, 2H), 3.73 (s, 6H), 5.67 (tdd, *J* = 0.8, 6.0, 15.2 Hz, 1H), 5.75-5.85 (m, 2H); <sup>13</sup>C NMR (100Mz, CDCl<sub>3</sub>) δ 23.1, 27.2, 35.0, 38.9, 53.1, 57.0, 63.4, 71.9, 74.9, 78.7, 79.7, 129.1, 130.0,

170.1, 177.1. IR ( film ): 933, 975, 1142, 1206, 1274, 1438, 1734, 2958, 3289  $\text{cm}^{-1}$ . HRMS (ESI)  $m/z$  calcd. For  $\text{C}_{19}\text{H}_{24}\text{O}_6$  ( $\text{M}+\text{Na}$ ) $^+$  371.1465, found 371.1459.

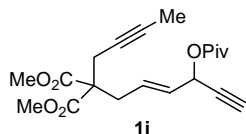

(*E*)-dimethyl 2-(but-2-ynyl)-2-(4-(pivaloyloxy)hex-2-en-5-ynyl)malonate (**1i**).

Compound **1i** (721 mg) was prepared in 50% yield over 3 steps from **1i-2**. (silica gel, hexane/ethyl acetate 10:1), oil.  $^1\text{H}$  NMR (400Mz,  $\text{CDCl}_3$ )  $\delta$  1.20 (s, 9H), 1.75 (t,  $J=2.4$  Hz, 3H), 2.51 (d,  $J=2.4$  Hz, 1H), 2.71 (q,  $J=2.4$  Hz, 2H), 2.79 (d,  $J=7.6$  Hz, 2H), 3.72 (s, 6H), 5.65 (dd,  $J=6.0, 15.2$  Hz, 1H), 5.75-5.88 (m, 2H);  $^{13}\text{C}$  NMR (100Mz,  $\text{CDCl}_3$ )  $\delta$  3.7, 23.5, 27.2, 35.1, 38.9, 52.9, 57.4, 63.4, 73.2, 74.8, 79.4, 79.8, 129.60, 129.64, 170.4, 177.2. IR ( film ): 738, 933, 972, 1031, 1059, 1142, 1207, 1274, 1438, 1480, 1735, 2958, 3275  $\text{cm}^{-1}$ . HRMS (ESI)  $m/z$  calcd. For  $\text{C}_{20}\text{H}_{26}\text{O}_6$  ( $\text{M}+\text{Na}$ ) $^+$  385.1622, found 385.1619.

Preparation of substrate **1f**

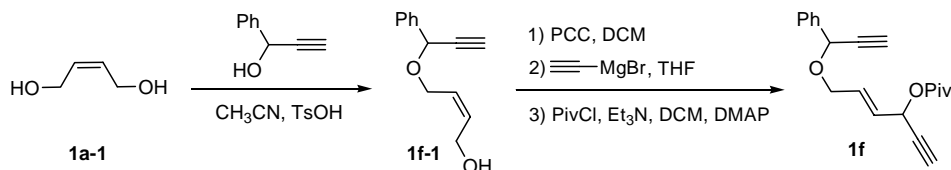

To a stirred solution of propargyl alcohol (1.98 g, 15 mmol) and *cis*-2-butene-1,4-diol **1a-1** (3.96 g, 45 mmol) in MeCN (80 mL) was added TsOH (258 mg, 10 mol %). The mixture was stirred at 80  $^{\circ}\text{C}$  for 8 h. The solvent was removed under reduced pressure and the residue was then purified by column chromatography (silica gel; hexane/ethyl acetate 2:1), affording the compound **1f-1** (1.8 g) in 60% yield. Product **1f** (1.13 g) was obtained in 61% yield over 3 steps from **1f-1** according to procedures described for **1a**.

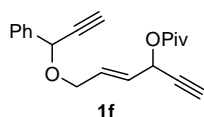

(*E*)-6-(1-phenylprop-2-ynoxy)hex-4-en-1-yn-3-yl pivalate (**1f**).

(silica gel, hexane/ethyl acetate 20:1), oil. (two diastereomers,  $\text{dr}=1:1$ )  $^1\text{H}$  NMR (400 MHz,  $\text{CDCl}_3$ ):  $\delta$  1.22 (s, 9 H), 2.53-2.54 (m, 1 H), 2.64-2.66 (m, 1 H), 4.12-4.26 (m, 2 H), 5.20 (d,  $J=2.0$  Hz, 1 H, one isomer), 5.21 (d,  $J=2.0$  Hz, 1 H, the other isomer), 5.81-5.88 (m, 2 H), 6.07-6.15 (m, 1 H), 7.33-7.40 (m, 3 H), 7.51-7.53 (m, 2 H).  $^{13}\text{C}$  NMR (100 MHz,  $\text{CDCl}_3$ ):  $\delta$  27.0, 38.7, 63.01, 63.04, 67.3, 70.68, 70.74, 74.78, 74.81, 75.9, 79.4, 81.3, 127.2, 127.3, 127.4, 128.5, 128.6, 130.8, 130.9, 137.8, 177.0. IR (film):  $\nu$  966, 1030, 1140, 1272, 1717, 2972, 3291  $\text{cm}^{-1}$ . HRMS (ESI)  $m/z$  calcd. For  $\text{C}_{20}\text{H}_{22}\text{O}_3$  ( $\text{M}+\text{Na}$ ) $^+$  333.1461, found 333.1462.

### Preparation of substrate **1g**

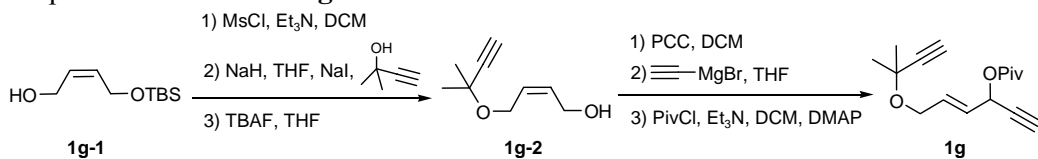

To a stirred solution of known compound **1g-1**<sup>4</sup> (3.03 g, 15 mmol) and Et<sub>3</sub>N (1.67 g, 16.5 mmol) in DCM (70 mL) was slowly added MsCl (1.88 g, 16.5 mmol) dropwise at -10 °C. After stirring at the same temperature for 10 min, the reaction mixture was allowed to stir at room temperature for 30 min. The resulting mixture was diluted with DCM (60 mL), washed with H<sub>2</sub>O, brine, dried over anhydrous Na<sub>2</sub>SO<sub>4</sub>, and concentrated under reduced pressure to give the crude methanesulfonate product for next step without purification.

To a stirred solution of NaH (672 mg, 16.8 mmol, 60% in mineral oil) in THF (60 mL) was added 2-methylbut-3-yn-2-ol (1.41 g, 16.8 mmol) at 0 °C under argon. After stirring at rt for 0.5 h, the above crude methanesulfonate product and NaI (1.05 g, 50 %) were added sequentially. The reaction mixture was allowed to stir overnight. The reaction was quenched with H<sub>2</sub>O. The mixture was diluted with ethyl acetate, washed with H<sub>2</sub>O, brine, dried over anhydrous Na<sub>2</sub>SO<sub>4</sub>, and concentrated under reduced pressure to give the crude propargyl ether for next step without purification.

To a stirred solution of the above crude propargyl ether (2.94 g, 11 mmol) in THF (50 mL) was added a solution of tetrabutylammonium fluoride (4.35 g, 16.5 mmol) in THF (20 mL) at 0 °C. The mixture was stirred at room temperature for 5 h. The solvent was removed under reduced pressure, and the residue was diluted with ethyl acetate, washed with H<sub>2</sub>O, brine, dried over anhydrous Na<sub>2</sub>SO<sub>4</sub>, and concentrated under vacuum. The residue was purified by column chromatography (silica gel, hexane/ethyl acetate 2:1) to afford **1g-2** (1.22 g) in 53% yield over 3 steps.

Compound **1g** (927 mg) was obtained in 59% yield over 3 steps from **1g-2** according to procedures described for **1a**.

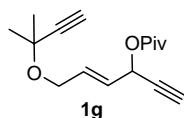

(*E*)-6-(2-methylbut-3-yn-2-yloxy)hex-4-en-1-yn-3-yl pivalate (**1g**).

(silica gel, hexane/ethyl acetate 20:1), oil. (927 mg) <sup>1</sup>H NMR (400 MHz, CDCl<sub>3</sub>): δ 1.22 (s, 9 H), 1.49 (s, 6 H), 2.42 (s, 1 H), 2.52 (d, *J* = 2.0 Hz, 1 H), 4.16 (td, *J* = 1.2, 5.2 Hz, 2 H), 5.76-5.86 (m, 2 H), 6.11 (dtd, *J* = 1.2, 5.2, 15.2 Hz, 1 H). <sup>13</sup>C NMR (100 MHz, CDCl<sub>3</sub>): δ 27.0, 28.7, 38.7, 63.2, 63.7, 70.3, 72.3, 74.6, 79.5, 85.7, 125.8, 132.2, 177.0. IR (film): ν 964, 1138, 1362, 1718, 2982, 3293 cm<sup>-1</sup>. HRMS (ESI) *m/z* calcd. For C<sub>16</sub>H<sub>22</sub>O<sub>3</sub> (M+Na)<sup>+</sup> 285.1461, found 285.1466.

### Preparation of substrate **1h**, **1j** and **1k**

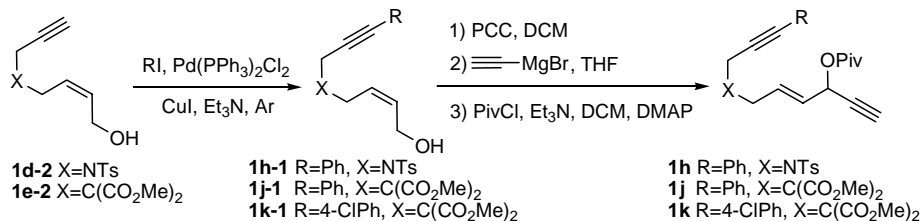

To a solution of compound **1d-2** (1.67 g, 6 mmol) and phenyl iodide (1.22 g, 6.0 mmol) in Et<sub>3</sub>N (50 mL) was added CuI (11.5 mg, 1 mol %). The mixture was stirred for 5 min and PdCl<sub>2</sub>(PPh<sub>3</sub>)<sub>2</sub> (85 mg, 2 mol %) was added. The resulting mixture was then stirred under an argon atmosphere at room temperature for 24 h. The mixture was diluted with ethyl acetate (60 mL), washed with aqueous NH<sub>4</sub>Cl, H<sub>2</sub>O, brine, dried over anhydrous Na<sub>2</sub>SO<sub>4</sub>, and concentrated under reduced pressure. The residue was purified by column chromatography (silica gel, hexane/ethyl acetate 2:1) to afford **1h-1** (1.9 g) in 89% yield.

Product **1h** (1.1 g) was obtained in 61% yield over 3 steps from **1h-1** according to procedures described for **1a**.

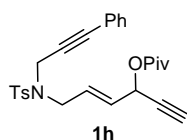

(*E*)-6-(*N*-(3-phenylprop-2-ynyl)-*N*-tosylamino)hex-4-en-1-yn-3-yl pivalate (**1h**).

(silica gel, hexane/ethyl acetate 10:1), oil. (1.1 g) <sup>1</sup>H NMR (400 MHz, CDCl<sub>3</sub>): δ 1.20 (s, 9 H), 2.34 (s, 3 H), 2.53 (d, *J* = 2.0 Hz, 1 H), 3.89-3.99 (m, 2 H), 4.24-4.34 (m, 2 H), 5.81-5.85 (m, 2 H), 5.96-6.01 (m, 1 H), 7.05-7.07 (m, 2 H), 7.22-7.29 (m, 5 H), 7.76-7.78 (m, 2 H). <sup>13</sup>C NMR (100 MHz, CDCl<sub>3</sub>): δ 21.4, 26.9, 37.0, 38.7, 47.7, 62.7, 75.1, 79.0, 81.4, 85.9, 122.1, 127.8, 128.1, 128.5, 128.8, 129.6, 129.8, 131.5, 135.8, 143.6, 176.9. IR (film): ν 1139, 1273, 1348, 1731, 2933, 2973, 3287 cm<sup>-1</sup>. HRMS (ESI) *m/z* calcd. For C<sub>27</sub>H<sub>29</sub>NO<sub>4</sub>S (M+Na)<sup>+</sup> 486.1709, found 486.1704.

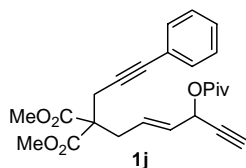

(*E*)-dimethyl 2-(3-phenylprop-2-ynyl)-2-(4-(pivaloyloxy)hex-2-en-5-ynyl)malonate (**1j**).

Product **1j** (270 mg) was obtained in 56% yield over 3 steps from **1j-1** (78% yield from **1e-2**) according to similar procedures. (silica gel, hexane/ethyl acetate 4:1), oil. <sup>1</sup>H NMR (400Mz, CDCl<sub>3</sub>) δ 1.21 (s, 9H), 2.52 (d, *J*= 2.0 Hz, 1H), 2.89 (dd, *J*= 0.8, 7.6 Hz, 2H), 3.01 (s, 2H), 3.76 (s, 6H), 5.71 (tdd, *J*= 0.8, 6.0, 15.2 Hz, 1H), 5.81 (ddd, *J*= 0.8, 2.0, 6.0 Hz, 1H), 5.89 (dtd, *J*= 0.8, 7.6, 15.2 Hz, 1H), 7.25-7.31 (m, 3H), 7.33-7.40 (m, 2H); <sup>13</sup>C NMR (100Mz, CDCl<sub>3</sub>) δ 24.1, 27.2, 35.3, 38.9, 53.1, 57.5, 63.4, 74.9, 79.8, 84.0, 84.1, 123.3, 128.3, 128.4, 129.4, 129.9, 131.9, 170.3, 177.2. IR ( film ): 757, 858,



971, 1140, 1204, 1274, 1437, 1479, 1490, 1733, 2957, 3287  $\text{cm}^{-1}$ . HRMS (ESI)  $m/z$  calcd. For  $\text{C}_{25}\text{H}_{28}\text{O}_6$  ( $\text{M}+\text{Na}$ ) $^+$  447.1778, found 447.1778.

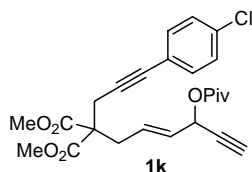

(*E*)-dimethyl-2-(3-(4-chlorophenyl)prop-2-ynyl)-2-(4-(pivaloyloxy)hex-2-en-5-ynyl) malonate (**1k**).

Product **1k** (375 mg) was obtained in 60% yield over 3 steps from **1k-1** (93% yield from **1e-2**) according to similar procedures. (silica gel, hexane/ethyl acetate 4:1), oil.  $^1\text{H}$  NMR (400Mz,  $\text{CDCl}_3$ )  $\delta$  1.21 (s, 9H), 2.53 (d,  $J= 2.4$  Hz, 1H), 2.87 (d,  $J= 7.2$  Hz, 2H), 3.00 (s, 2H), 3.76 (s, 6H), 5.66-5.74 (m, 1H), 5.78-5.83 (m, 1H), 5.88 (dtd,  $J= 1.2$ , 7.6, 15.2 Hz, 1H), 7.22-7.32 (m, 4H);  $^{13}\text{C}$  NMR (100Mz,  $\text{CDCl}_3$ )  $\delta$  24.1, 27.2, 35.4, 38.9, 53.1, 57.4, 63.4, 74.9, 79.7, 83.0, 85.2, 121.7, 128.8, 129.3, 130.0, 133.1, 134.3, 170.2, 177.2. IR (film): 703, 736, 829, 933, 1060, 1090, 1141, 1205, 1268, 1398, 1436, 1490, 1733, 2957, 3299  $\text{cm}^{-1}$ . HRMS (ESI)  $m/z$  calcd. For  $\text{C}_{25}\text{H}_{27}\text{ClO}_6$  ( $\text{M}+\text{Na}$ ) $^+$  481.1388, found 481.1391.

#### Preparation of substrate **11**

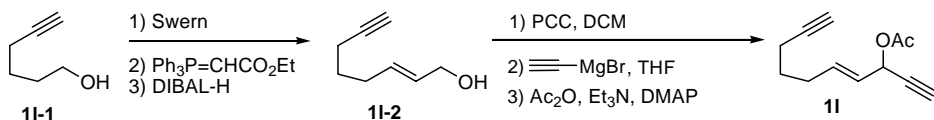

Compound **11-2** (907 mg, 73% yield from **11-1**) was prepared in 3 steps according to literature procedure.<sup>5</sup>

Product **11** (608 mg, 49% yield over 3 steps from **11-2**) was obtained according to procedures described for **1a** and **1b**.

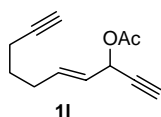

(*E*)-deca-4-en-1,9-diyn-3-yl acetate (**11**).

(silica gel, hexane/ethyl acetate 20:1), oil. (608 mg)  $^1\text{H}$  NMR (400Mz,  $\text{CDCl}_3$ )  $\delta$  1.60-1.70 (m, 2H), 1.96 (t,  $J= 2.4$  Hz, 1H), 2.10 (s, 3H), 2.17-2.25 (m, 4H), 2.57 (d,  $J= 2.0$  Hz, 1H), 5.59 (dd,  $J= 6.4$ , 15.2 Hz, 1H), 5.84 (d,  $J= 6.0$  Hz, 1H), 6.01 (td,  $J= 6.4$ , 15.2 Hz, 1H);  $^{13}\text{C}$  NMR (100Mz,  $\text{CDCl}_3$ )  $\delta$  18.0, 21.2, 27.6, 31.0, 64.1, 68.9, 75.0, 79.9, 84.1, 125.5, 135.8, 169.8. IR (film): 800, 967, 1015, 1226, 1371, 1434, 1738, 2940, 3294  $\text{cm}^{-1}$ . HRMS (ESI)  $m/z$  calcd. For  $\text{C}_{12}\text{H}_{14}\text{O}_2$  ( $\text{M}+\text{Na}$ ) $^+$  213.0886, found 213.0877.

### Preparation of substrate **1m**

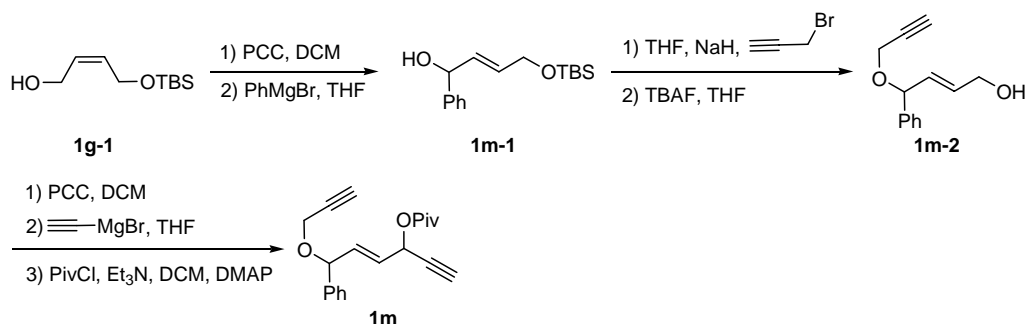

To a suspension of PCC (3.2 g, 15 mmol) and 4 Å MS (500 mg, 50mg/mmol) in CH<sub>2</sub>Cl<sub>2</sub> (80 mL) was added known compound **1g-1**<sup>4</sup> (2.02 g, 10 mmol) in dry CH<sub>2</sub>Cl<sub>2</sub> (20 mL) at 0 °C under Ar. The mixture was stirred at room temperature for 2.5 h. It was then poured into Et<sub>2</sub>O (150 mL). The mixed solution was filtered through silica gel and the filtrate was concentrated under reduced pressure to yield the crude aldehyde for the next step without purification.

To a stirred solution of above crude aldehyde in THF (50 mL) was added a solution of phenylmagnesium bromide solution (4 mL, 1.2 equiv, 3 M in ether) at room temperature. When the reaction was completed as determined by TLC analysis, the reaction mixture was quenched by addition of saturated aqueous ammonium chloride (40 mL) and extracted with ethyl ether (2×50 mL). The combined organic layers were washed with H<sub>2</sub>O, brine, dried over anhydrous Na<sub>2</sub>SO<sub>4</sub>, and concentrated under reduced pressure. The residue was purified by column chromatography (silica gel, hexane/ethyl acetate 10:1) to afford **1m-1** (1.6 g) in 57% yield.

To a stirred solution of NaH (287 mg, 7.2 mmol, 60% in mineral oil) and 15-crown-5 (526 mg, 2.4 mmol) in toluene (50 mL) was added a solution of alcohol **1m-1** (1.33 g, 4.8 mmol) in toluene (10 mL) at 0 °C under argon atmosphere. After stirring at rt for 0.5 h, a solution of propargyl bromide (1.76 g, 12 mmol, 80% (w/w) solution in toluene) in toluene (10 mL) was added. The reaction mixture was allowed to stir overnight. The reaction was quenched with H<sub>2</sub>O. The mixture was diluted with ethyl acetate, washed with H<sub>2</sub>O, brine, dried over anhydrous Na<sub>2</sub>SO<sub>4</sub>, and concentrated under reduced pressure. The residue was dissolved in THF (30 mL). A solution of TBAF (1.58 g, 5.98 mmol) in THF (10 mL) was added dropwise at 0 °C. When the reaction was completed as determined by TLC analysis, the reaction mixture was diluted with ether (60 mL), washed with H<sub>2</sub>O, brine, dried over anhydrous Na<sub>2</sub>SO<sub>4</sub>, and concentrated under reduced pressure. The residue was purified by column chromatography (silica gel, hexane/ethyl acetate 4:1) to afford **1m-2** (682 mg) in 56% yield.

Product **1m** (511 mg, 52% yield over 3 steps from **1m-2**) was obtained according to procedures described for **1a**.

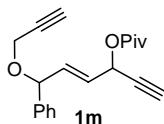

(*E*)-6-phenyl-6-(prop-2-ynyloxy)hex-4-en-1-yn-3-yl pivalate (**1m**).

(silica gel, hexane/ethyl acetate 20:1), oil. (511 mg) (two diastereomers, dr=1:1) <sup>1</sup>H NMR (400 MHz, CDCl<sub>3</sub>): δ 1.21 (s, 9 H), 2.43-2.45 (m, 1 H), 2.52 (t, *J* = 2.4 Hz, 1 H), 4.04-4.19 (m, 2 H), 5.10 (d, 6.4 Hz, 1 H), 5.83-5.91 (m, 2 H), 6.09-6.16 (m, 1 H), 7.29-7.39 (m, 5 H). <sup>13</sup>C NMR (100 MHz, CDCl<sub>3</sub>): δ 27.0, 38.7, 55.3, 55.4, 62.89, 62.91, 74.6, 74.9, 79.2, 79.41, 79.44, 79.5, 126.86, 126.93, 127.3, 128.2, 128.6, 134.5, 139.2, 177.0. IR (film): ν 1067, 1138, 1272, 1456, 1718, 2972, 3292 cm<sup>-1</sup>. HRMS (ESI) *m/z* calcd. For C<sub>20</sub>H<sub>22</sub>O<sub>3</sub> (M+Na)<sup>+</sup> 333.1461, found 333.1458.

#### Preparation of substrate **1n**

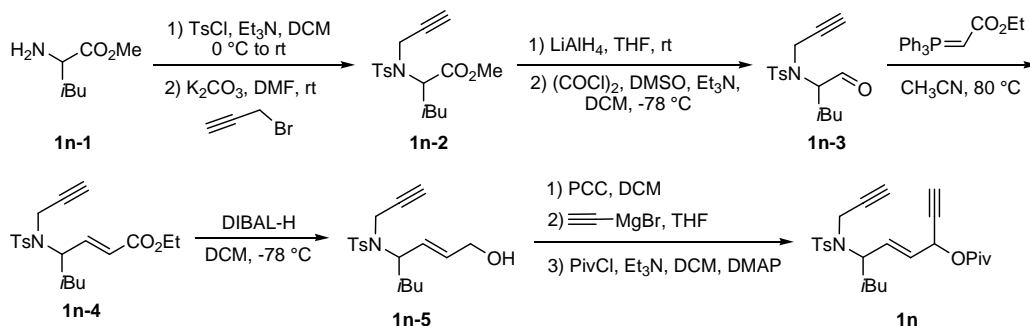

Compound **1n-3** was prepared in 4 steps according to literature procedure.<sup>6</sup>

To a stirred solution of aldehyde **1n-3**<sup>6</sup> (14 mmol) in CH<sub>3</sub>CN (40.0 mL) was added (carbethoxymethylene)triphenylphosphorane (6.82 g, 19.6 mmol). The resulting mixture was stirred overnight at room temperature. The solvent was removed under reduced pressure. The resulting residue was purified by column chromatography (silica gel, hexane/ethyl acetate 4:1) to give the enoate **1n-4** (4.3 g) in 96% yield.

To a stirred solution of enoate **1n-4** (2.64 g, 7 mmol) in DCM (30 mL) at -78 °C was added DIBALH (1.0 M solution in hexane; 24 mL, 24 mmol) under argon. The reaction was quenched with NaOH (10% aqueous solution) after 3 h. The mixture was diluted with DCM, washed with H<sub>2</sub>O, brine, dried over anhydrous Na<sub>2</sub>SO<sub>4</sub>, and concentrated under reduced pressure to give the crude alcohol **1n-5** for the next step without purification. Product **1n** (1.6 g) was obtained in 59% yield from **1n-4** over 4 steps according to procedures described for **1a** after DIBALH reduction.

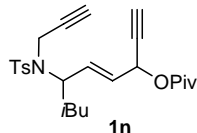

(*E*)-6-(*N*-(prop-2-ynyl)-*N*-tosylamino)-8-methylnon-4-en-1-yn-3-yl pivalate (**1n**).

(silica gel, hexane/ethyl acetate 20:1), oil. (1.6 g) (two diastereomers, dr=1:1) <sup>1</sup>H NMR (400 MHz, CDCl<sub>3</sub>): δ 0.86-0.89 (m, 6 H), 1.19 (m, 9 H), 1.42-1.48 (m, 1 H), 1.57-1.64 (m, 2 H), 2.14-2.16 (m, 1 H), 2.41 (s, 3 H), 2.49 (d, *J* = 2.4 Hz, 1 H), 3.91-4.09 (m, 2 H), 4.48-4.53 (m, 1 H), 5.52-5.58 (m, 1 H), 5.69-5.74 (m, 1 H), 5.83-5.91 (m, 1 H), 7.26-7.29 (m, 2 H), 7.76-7.78 (m, 2 H). <sup>13</sup>C NMR (100 MHz, CDCl<sub>3</sub>): δ 21.4, 22.01, 22.04, 22.3, 22.4, 24.2, 26.8, 32.3, 32.4, 38.6, 40.8, 40.9, 56.5, 56.6, 62.6, 62.8, 72.43, 72.45, 74.7, 74.8, 78.9, 79.0, 79.57, 79.61, 127.48, 127.51, 129.3, 132.5, 132.8, 137.3,

137.4, 143.2, 143.3, 176.7. IR (film):  $\nu$  863, 1092, 1140, 1338, 2959, 3275  $\text{cm}^{-1}$ . HRMS (ESI)  $m/z$  calcd. For  $\text{C}_{25}\text{H}_{33}\text{NO}_4\text{S}$  ( $\text{M}+\text{Na}$ )<sup>+</sup> 466.2022, found 466.2025.

### Preparation of substrate **1o**

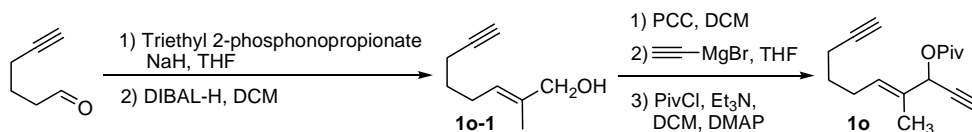

To a stirred solution of NaH (560 mg, 14 mmol, 60% in mineral oil) in THF (60 mL) was added a solution of triethyl 2-phosphonopropionate (3.33 g, 14 mmol) in THF (20 mL) at 0 °C under argon atmosphere. After stirring at rt for 0.5 h, a solution of 5-hexynal<sup>5</sup> (960 mg, 10 mmol) in THF (10 mL) was added. The reaction mixture was allowed to stir overnight. The reaction was quenched with H<sub>2</sub>O. The mixture was diluted with ether, washed with H<sub>2</sub>O, brine, dried over anhydrous Na<sub>2</sub>SO<sub>4</sub>, and concentrated under reduced pressure. The residue was dissolved in DCM (50 mL). A solution of DIBAL-H (25 mL, 1 M solution in hexane) was added. After stirring at rt for 1 h, the reaction was carefully quenched with 10% NaOH aqueous solution. The mixture was diluted with DCM (100 mL), washed with H<sub>2</sub>O, brine, dried over anhydrous Na<sub>2</sub>SO<sub>4</sub>, and concentrated under reduced pressure. The residue was purified by column chromatography (silica gel, hexane/ethyl acetate 4:1) to give the alcohol **1o-1** (1.14 g) in 83% yield.

Product **1o** (693 mg) was obtained in 47% yield from **1o-1** over 3 steps according to procedures described for **1a**.

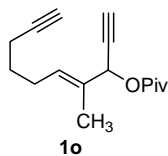

(E)-4-methyldeca-4-en-1,9-diyn-3-yl pivalate (**1o**).

(silica gel, hexane/ethyl acetate 20:1), oil. (693 mg) <sup>1</sup>H NMR (400 MHz, CDCl<sub>3</sub>):  $\delta$  1.22 (s, 9 H), 1.59-1.66 (m, 2 H), 1.75 (s, 3 H), 1.96 (t,  $J$  = 2.8 Hz, 1 H), 2.17-2.22 (m, 4 H), 2.50 (d,  $J$  = 1.6 Hz, 1 H), 5.67 (tt,  $J$  = 1.2, 7.2 Hz, 1 H), 5.75 (d,  $J$  = 1.6 Hz, 1 H). <sup>13</sup>C NMR (100 MHz, CDCl<sub>3</sub>):  $\delta$  12.4, 17.8, 26.6, 27.0, 27.8, 38.8, 68.45, 68.50, 74.2, 80.0, 84.1, 129.5, 131.5, 177.0. IR (film):  $\nu$  872, 1030, 1272, 1479, 1730, 2360, 2974, 3295  $\text{cm}^{-1}$ . HRMS (ESI)  $m/z$  calcd. For  $\text{C}_{16}\text{H}_{22}\text{O}_2$  ( $\text{M}+\text{Na}$ )<sup>+</sup> 269.1512, found 269.1513.

Preparation of substrates **1t**, **1x**, and **1z**.

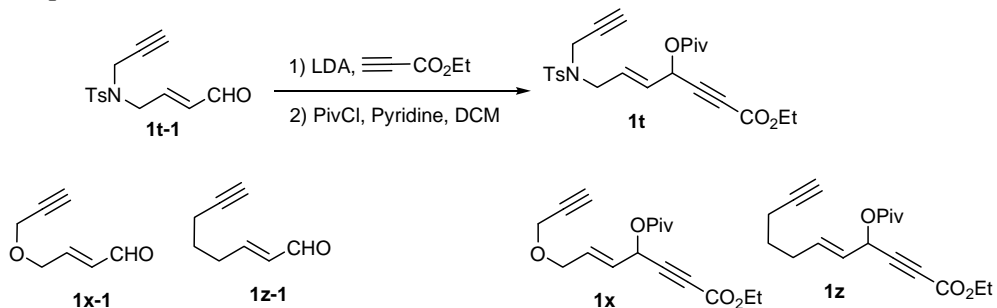

Procedure for **1t**: To a stirred solution of diisopropylamine (6.8 mmol, 1.7 equiv) in THF (20 mL) was added a solution of *n*-butyllithium (1.6 M in hexanes, 4.3 mL, 6.8 mmol, 1.7 equiv) slowly at -78 °C. The mixture was stirred at -78 °C for 15 min, warmed to 0 °C, and stirred for another 30 min at this temperature. The mixture was cooled to -78 °C and ethyl propiolate (6 mmol, 1.5 equiv) was added. After stirring for 30 min at -78 °C, a solution of aldehyde **1t-1** (4 mmol, 1.0 equiv, obtained according to procedures described for **1d**) in THF (10 mL) was added. After stirring at -78 °C for 3 h, the reaction mixture was added to a saturated ammonium chloride solution at 0 °C. The aqueous phase was extracted with Et<sub>2</sub>O, the combined organic layer was washed with brine, dried over MgSO<sub>4</sub> and the solvents were removed under reduced pressure to give an oil.

To a solution of above oil (1.1 g, 3 mmol, 1.0 equiv) in CH<sub>2</sub>Cl<sub>2</sub> (30 mL), was added pyridine (711 mg, 3 equiv), DMAP (one crystal) and pivaloyl chloride (540 mg, 1.5 equiv) at 0°C. After stirring for overnight, the mixture was diluted with CH<sub>2</sub>Cl<sub>2</sub> (30 mL) and washed with a 10% copper sulfate aqueous solution, brine, dried over MgSO<sub>4</sub>, and concentrated under reduced pressure. The crude product was purified by flash chromatography on silica gel (hexane/ethyl acetate 4:1) to give **1t** (1.13 g, 62% yield over 2 steps).

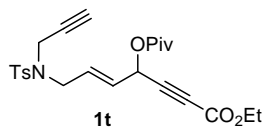

(*E*)-ethyl 7-(N-(prop-2-ynyl)-N-tosylamino)-4-(pivaloyloxy)hept-5-en-2-ynoate (**1t**). oil. (1.13 g) <sup>1</sup>H NMR (400 MHz, CDCl<sub>3</sub>) δ 1.21 (s, 9H), 1.32 (t, *J* = 7.2 Hz, 3H), 2.04 (t, *J* = 2.4 Hz, 1H), 2.43 (s, 3H), 3.83-3.94 (m, 2H), 4.01-4.13 (m, 2H), 4.25 (q, *J* = 7.2 Hz, 2H), 5.74-5.80 (m, 1H), 5.87-5.95 (m, 2H), 7.30 (d, *J* = 8.4 Hz, 2H), 7.72 (d, *J* = 8.4 Hz, 2H); <sup>13</sup>C NMR (125 MHz, CDCl<sub>3</sub>) δ 14.0, 21.5, 26.9, 36.2, 38.8, 47.4, 62.2, 62.3, 74.1, 76.2, 77.9, 81.4, 127.7, 128.2, 129.6, 129.7, 135.7, 143.8, 152.8, 176.7. IR (film): ν 1092, 1132, 1160, 1247, 1349, 1713, 2244, 2935, 2978, 3277. HRMS (ESI) *m/z* calcd. For C<sub>24</sub>H<sub>29</sub>NO<sub>6</sub>S (M+Na)<sup>+</sup> 482.1607, found 482.1592.

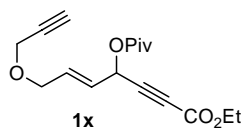

(*E*)-ethyl 4-(pivaloyloxy)-7-(prop-2-ynyloxy)hept-5-en-2-ynoate (**1x**).

Compound **1x** (230 mg) was prepared in 47% yield from aldehyde **1x-1** (obtained according to procedures described for **1a**) according to procedures described for **1t**. (silica gel, hexane/ethyl acetate 10:1), oil. <sup>1</sup>H NMR (400 MHz, CDCl<sub>3</sub>, TMS): δ 1.23 (s, 9H), 1.32 (t, *J* = 7.2 Hz, 3H), 2.45 (t, *J* = 2.4 Hz, 1H), 4.12 (dt, *J* = 5.2, 1.6 Hz, 2H), 4.17 (t, *J* = 2.4 Hz, 2H), 4.24 (q, *J* = 7.2 Hz, 2H), 5.82 (ddt, *J* = 15.2, 6.0, 1.6 Hz, 1H), 5.98 (dq, *J* = 6.0, 1.2 Hz, 1H), 6.07 (dtd, *J* = 15.2, 5.2, 1.2 Hz, 1H). <sup>13</sup>C NMR (100 MHz, CDCl<sub>3</sub>): δ 14.2, 27.2, 39.0, 57.8, 62.5, 62.7, 68.8, 75.1, 78.0, 79.5, 82.1, 125.8, 131.9, 153.1, 177.0. IR (film): ν 2981, 2916, 2249, 1714, 1249, 1135, 1030, 961, 910, 731 cm<sup>-1</sup>. HRMS (ESI) *m/z* calcd. For C<sub>17</sub>H<sub>22</sub>NaO<sub>5</sub> (M+Na)<sup>+</sup> 329.1359, found 329.1367.

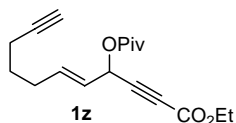

(*E*)-ethyl 4-(pivaloyloxy)undeca-5-en-2,10-diyynoate (**1z**).

Compound **1z** (310 mg) was prepared in 53% yield from aldehyde **1z-1** (obtained according to procedures described for **1l**) according to procedures described for **1t**. (silica gel, hexane/ethyl acetate 10:1), oil. <sup>1</sup>H NMR (400 MHz, CDCl<sub>3</sub>) δ 1.20 (s, 9H), 1.30 (t, *J* = 6.8 Hz, 3H), 1.67-1.57 (m, 2H), 1.95 (t, *J* = 2.4 Hz, 1H), 2.24-2.15 (m, 4H), 4.23 (q, *J* = 6.8 Hz, 2H), 5.55 (tdd, *J* = 1.6, 6.4, 15.2, 1H), 5.90 (tdd, *J* = 0.8, 0.8, 6.4 Hz, 1H), 5.95 (tdd, *J* = 0.8, 7.2, 15.2 Hz, 1H); <sup>13</sup>C NMR (100 MHz, CDCl<sub>3</sub>) δ 14.2, 18.0, 27.2, 27.4, 31.1, 39.0, 62.4, 63.4, 69.0, 77.8, 82.8, 84.0, 124.4, 136.6, 153.3, 177.1. IR (film): ν 1134, 1247, 1366, 1479, 1715, 1735, 2243, 2978. HRMS (ESI) *m/z* calcd. For C<sub>18</sub>H<sub>24</sub>O<sub>4</sub> (M+Na)<sup>+</sup> 327.1567, found 327.1577.

Preparation of substrates **1u**, **1v**, **1w** and **1y**.

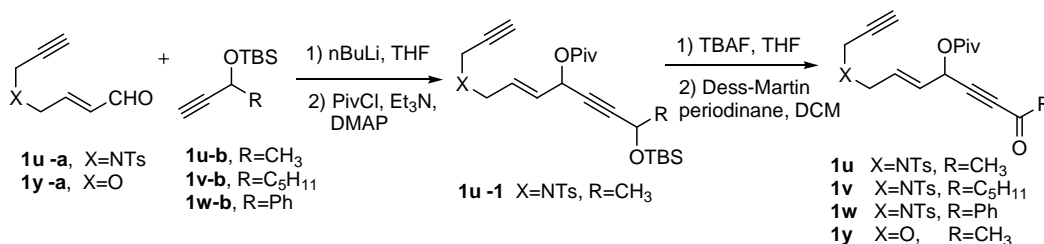

Procedure for **1u**: To a stirred solution of terminal alkyne **1u-b** (883 mg, 4.8 mmol) in THF (30 mL) was added *n*BuLi (3 mL, 4.8 mmol, 1.6 M in hexane) at -78 °C. The mixture was stirred at -78 °C for 15 min, warmed to 0 °C, and stirred for another 20 min at this temperature. The mixture was cooled to -78 °C and a solution of aldehyde **1u-a** (831 mg, 3 mmol) in THF (10 mL) was added. After stirring for 1h at -78 °C, the reaction mixture was quenched with saturated ammonium chloride and extracted with diethyl ether. The combined organic layer was washed with brine and dried over anhydrous Na<sub>2</sub>SO<sub>4</sub>. The solvent was evaporated under reduced pressure. The residue was dissolved in DCM (30 mL). To this solution was added Et<sub>3</sub>N (1.2g, 12 mmol), PivCl (720 mg, 6 mmol) and DMAP (5%) at 0 °C. The solution was then warmed to rt. After stirring at rt for 2h, the reaction mixture was diluted with DCM (30 mL), washed with H<sub>2</sub>O, brine, dried over anhydrous Na<sub>2</sub>SO<sub>4</sub>. The solvent was evaporated and the

residue was purified by flash column chromatography (silica gel, Hexane/ ethyl acetate = 30:1) to provide product **1u-1** (1.09 g) in 67% yield.

To a solution of **1u-1** (1.09 g, 2 mmol) in THF (30 mL) was added a solution of TBAF (3 mL, 1M in THF) at 0 °C. After stirring at rt for 20 min, the reaction mixture was diluted with ether (60 mL), washed with H<sub>2</sub>O, brine, dried over anhydrous Na<sub>2</sub>SO<sub>4</sub>. The solvent was removed under reduced pressure. The residue was dissolved in DCM (30 mL). Dess-Martin Periodinane (715 mg, 2.6 mmol) was then added at 0 °C. After stirring at rt for 30 min, the reaction solution was filtered to remove the solid. The filtrate was washed with saturated aqueous Na<sub>2</sub>SO<sub>3</sub> and NaHCO<sub>3</sub> solution, H<sub>2</sub>O, brine and dried over anhydrous Na<sub>2</sub>SO<sub>4</sub>. The solvent was removed and the residue was purified by flash column chromatography (silica gel, hexane/ethyl acetate 4:1) to give desired product **1u** (630 mg) in 74% yield as an oil.

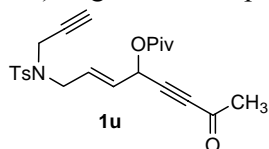

(*E*)-1-(*N*-(prop-2-ynyl)-*N*-tosylamino)-7-oxooct-2-en-5-yn-4-yl pivalate (**1u**).

oil. (630 mg) <sup>1</sup>H NMR (400 MHz, CDCl<sub>3</sub>) δ 1.22 (s, 9H), 2.04 (t, *J* = 2.4 Hz, 1H), 2.36 (s, 3H), 2.43 (s, 3H), 3.83-3.94 (m, 2H), 4.02-4.13 (m, 2H), 5.78 (tdd, *J* = 1.2, 5.6, 15.6 Hz, 1H), 5.91 (dtd, *J* = 1.2, 6.4, 15.6 Hz, 1H), 5.96 (dd, *J* = 0.8, 5.6 Hz, 1H), 7.31 (d, *J* = 8.0 Hz, 2H), 7.73 (d, *J* = 8.4 Hz, 2H); <sup>13</sup>C NMR (100 MHz, CDCl<sub>3</sub>) δ 21.5, 26.9, 32.6, 36.2, 38.8, 47.4, 62.3, 74.1, 76.2, 85.0, 85.5, 127.7, 128.2, 129.6, 129.7, 135.7, 143.8, 176.7, 183.6. IR (film): ν 1092, 1133, 1160, 1222, 1349, 1681, 1734, 2216, 2934, 2975, 3274. HRMS (ESI) *m/z* calcd. For C<sub>23</sub>H<sub>27</sub>NO<sub>5</sub>S (M+Na)<sup>+</sup> 452.1502, found 452.1498.

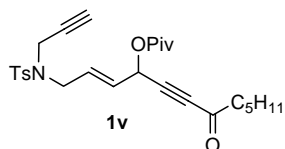

(*E*)-1-(*N*-(prop-2-ynyl)-*N*-tosylamino)-7-oxododec-2-en-5-yn-4-yl pivalate (**1v**).

Compound **1v** (625 mg) was prepared in 43% yield from aldehyde **1u-a** and alkyne **1v-b** according to procedures described for **1u**. (silica gel, hexane/ethyl acetate 10:1), oil. <sup>1</sup>H NMR (400 MHz, CDCl<sub>3</sub>) δ 0.90 (t, *J* = 6.8 Hz, 3H), 1.22 (s, 9H), 1.22-1.38 (m, 4H), 1.62-1.70 (m, 2H), 2.03 (t, *J* = 2.4 Hz, 1H), 2.43 (s, 3H), 2.56 (t, *J* = 7.6 Hz, 2H), 3.83-3.93 (m, 2H), 4.02-4.12 (m, 2H), 5.78 (tdd, *J* = 1.2, 5.6, 15.2 Hz, 1H), 5.90 (dtd, *J* = 1.2, 6.4, 15.2 Hz, 1H), 5.96 (dd, *J* = 1.2, 5.6 Hz, 1H), 7.30 (d, *J* = 8.0 Hz, 2H), 7.72 (d, *J* = 8.0 Hz, 2H); <sup>13</sup>C NMR (100 MHz, CDCl<sub>3</sub>) δ 13.8, 21.5, 22.3, 23.5, 26.9, 31.0, 36.2, 38.8, 45.4, 47.4, 62.4, 74.1, 76.2, 84.7, 85.7, 127.7, 128.3, 129.6, 129.6, 135.7, 143.8, 176.7, 187.2. IR (film): ν 1092, 1132, 1160, 1271, 1349, 1678, 1735, 2219, 2872, 2932, 2959, 3274. HRMS (ESI) *m/z* calcd. For C<sub>27</sub>H<sub>35</sub>NO<sub>5</sub>S (M+Na)<sup>+</sup> 508.2128, found 508.2133.

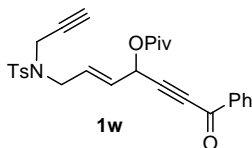

(*E*)-7-(*N*-(prop-2-ynyl)-*N*-tosylamino)-1-oxo-1-phenylhept-5-en-2-yn-4-yl pivalate (**1w**).

Compound **1w** (765 mg) was prepared in 52% yield from aldehyde **1u-a** and alkyne **1w-b** according to procedures described for **1u**. (silica gel, hexane/ethyl acetate 4:1), oil. <sup>1</sup>H NMR (400 MHz, CDCl<sub>3</sub>) δ 1.26 (s, 9H), 2.06 (t, *J* = 2.4 Hz, 1H), 2.41 (s, 3H), 3.87-3.97 (m, 2H), 4.04-4.15 (m, 2H), 5.88 (tdd, *J* = 1.2, 6.0, 15.2 Hz, 1H), 5.99 (dtd, *J* = 1.2, 6.4, 15.2 Hz, 1H), 6.08 (dd, *J* = 1.2, 5.6 Hz, 1H), 7.29 (d, *J* = 7.6 Hz, 2H), 7.49 (t, *J* = 7.6 Hz, 2H), 7.61-7.65 (m, 1H), 7.73 (d, *J* = 8.4 Hz, 2H), 8.08-8.11 (m, 2H); <sup>13</sup>C NMR (100 MHz, CDCl<sub>3</sub>) δ 21.5, 27.0, 36.3, 38.9, 47.5, 62.6, 74.1, 76.3, 83.5, 88.2, 127.7, 128.3, 128.7, 129.6, 129.8, 134.4, 135.7, 136.3, 143.8, 176.8, 177.1. IR (film): ν 1092, 1132, 1159, 1261, 1348, 1597, 1646, 1734, 2225, 2332, 2975, 3277. HRMS (ESI) *m/z* calcd. For C<sub>28</sub>H<sub>29</sub>NO<sub>5</sub>S (M+Na)<sup>+</sup> 514.1659, found 514.1676.

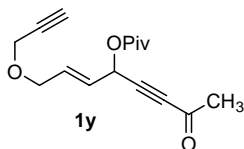

(*E*)-7-oxo-1-(prop-2-ynyloxy)oct-2-en-5-yn-4-yl pivalate (**1y**).

Compound **1y** (192 mg) was prepared in 52% yield from aldehyde **1y-a** and alkyne **1u-b** according to procedures described for **1u**. (silica gel, hexane/ethyl acetate 10:1), oil. <sup>1</sup>H NMR (500 MHz, CDCl<sub>3</sub>, TMS): δ 1.23 (s, 9H), 2.36 (s, 3H), 2.47 (t, *J* = 2.5 Hz, 1H), 4.13 (m, 2H), 4.17 (d, *J* = 2.5 Hz, 2H), 5.83 (m, 1H), 6.00 (m, 1H), 6.06 (m, 1H). <sup>13</sup>C NMR (125 MHz, CDCl<sub>3</sub>): δ 27.2, 32.9, 39.1, 57.9, 62.9, 68.9, 75.1, 79.5, 85.2, 86.3, 125.9, 131.9, 177.1, 183.9. IR (film): ν 2974, 2216, 1734, 1681, 1479, 1360, 1271, 1223, 1135, 1031, 956, 936 cm<sup>-1</sup>. HRMS (ESI) *m/z* calcd. For C<sub>16</sub>H<sub>20</sub>NaO<sub>4</sub> (M+Na)<sup>+</sup> 299.1354, found 299.1364.

#### Preparation of substrate **1aa**.

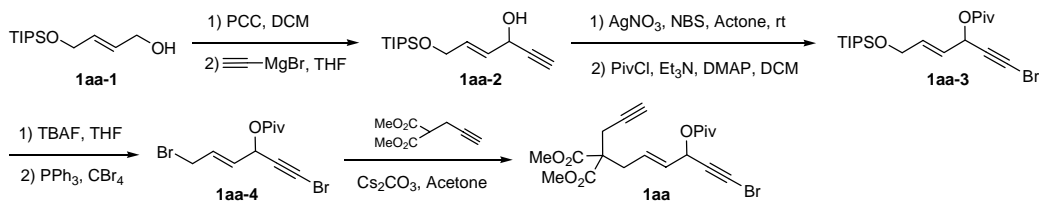

Compound **1aa-1** (3.44 g) was prepared in 86% yield from *cis*-2-butene-1,4-diol according to procedure described for **1g-1**. Propargyl alcohol **1aa-2** (2.26 g) was prepared in 63% yield from compound **1aa-1** (3.44 g) according to procedures described for **1a**.

To a solution of **1aa-2** (775 mg, 2.89 mmol) in dry acetone (24 ml) was added AgNO<sub>3</sub> (108 mg, 0.64 mmol) and NBS (771 mg, 4.33 mmol) at room temperature. The



mixture was stirred at room temperature for 30 min. After the addition of saturated NaHCO<sub>3</sub> (24 ml), the mixture was extracted with EtOAc. The combined extracts were dried with anhydrous MgSO<sub>4</sub> and concentrated under reduced pressure. The residue was dissolved in CH<sub>2</sub>Cl<sub>2</sub> (20 mL). To this solution was added triethylamine (0.95 mL, 6.80 mmol, 3.0 equiv), pivaloyl chloride (0.34 mL, 2.72 mmol, 1.2 equiv), and DMAP (5 mol %) at room temperature. The resulting mixture was stirred overnight, washed with water, brine, and dried over anhydrous MgSO<sub>4</sub>. After removing the solvent under reduced pressure, the residue was purified by silica gel column chromatography to afford the desired propargylic ester **1aa-3** (894 mg) in 72% yield for 2 steps.

To a stirred solution of compound **1aa-3** (890 mg, 2.08 mmol) in THF (10 mL) was added a solution of tetrabutylammonium fluoride (3.12 mL, 3.12 mmol, 1.0M in THF) at 0 °C. The mixture was stirred at room temperature for 1 h. The solvent was removed under reduced pressure, and the residue was diluted with ethyl acetate, washed with H<sub>2</sub>O, brine, dried over anhydrous MgSO<sub>4</sub>, and concentrated under reduced pressure. To a solution of above residue in CH<sub>2</sub>Cl<sub>2</sub> (20 mL) was added triphenylphosphine (786 mg, 3 mmol) and tetrabromomethane (981 mg, 3 mmol). The reaction mixture was stirred for 1 h at room temperature before silica was added and the solvents were removed under reduced pressure. The residue was purified through silica gel column chromatography to afford the corresponding bromide **1aa-4** (502 mg, 73% yield for 2 steps).

To a stirred solution of dimethylpropargyl malonate (23.0 mg, 0.12 mmol) and cesium carbonate (40.7 mg, 0.12 mmol) in dry acetone (3 mL) was added **1aa-4** (50.7 mg, 0.15 mmol). The resulting mixture was heated to 60°C and stirred overnight. The residue was filtered through a short pad of silica gel and the filtrate was concentrated under reduced pressure. The crude product was purified by silica gel column chromatography (20:1 Hex/EtOAc) to afford **1aa** (18 mg) in 35% yield as an oil.

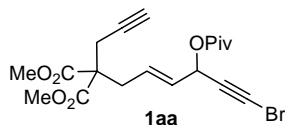

dimethyl 2-((E)-6-bromo-4-(pivaloyloxy)hex-2-en-5-ynyl)-2-(prop-2-ynyl)malonate (**1aa**).

Oil, (18 mg) <sup>1</sup>H NMR (400Mz, CDCl<sub>3</sub>) δ 1.21 (s, 9H), 2.03 (brs, 1H), 2.78 (brs, 2H), 2.83 (d, *J* = 8.0 Hz, 2H), 3.75 (s, 6H), 5.66 (dd, *J* = 6.0, 14.0 Hz, 1H), 5.74-5.80 (m, 2H); <sup>13</sup>C NMR (100Mz, CDCl<sub>3</sub>) δ 23.1, 27.2, 35.1, 39.0, 47.4, 53.1, 57.0, 64.3, 72.0, 76.2, 78.7, 129.2, 130.0, 170.1, 177.1. IR (film): 733, 912, 975, 1032, 1142, 1208, 1274, 1437, 1734, 2359, 2957, 3295 cm<sup>-1</sup>. HRMS (ESI) *m/z* calcd. For C<sub>19</sub>H<sub>23</sub>BrO<sub>6</sub> (M+Na)<sup>+</sup> 449.0570, found 449.0576.

### Preparation of substrate **1ab**.

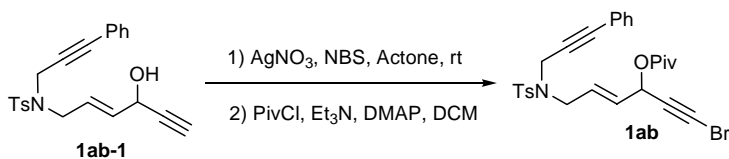

Compound **1ab-1** was obtained during the preparation of **1h**.

To a solution of AgNO<sub>3</sub> (0.6 mmol, 10 %) in acetone (0.2 M) was added a propargyl alcohol **1ab-1** (2.27 g, 6 mmol). After stirring at rt for 10 min, NBS (7.2 mmol, 1.2 equiv) was added. The reaction mixture was stirred at rt until no starting material was left as indicated by TLC. The reaction mixture was filtered through a small pad of celite. The filtrate was concentrated under *vacuum* and the crude bromopropargyl alcohol was purified by silica gel flash column chromatography. Product **1ab** (1.59 g) was obtained in 49% yield over two steps from **1ab-1** after esterification of the resulting alcohol following procedures described for the synthesis of **1a**.

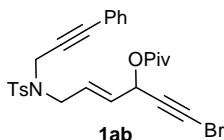

(*E*)-6-(N-(3-phenylprop-2-ynyl)-N-tosylamino)-1-bromohex-4-en-1-yn-3-yl pivalate (**1ab**).

(silica gel, hexane/ethyl acetate 10:1), oil. (1.59 g) <sup>1</sup>H NMR (400 MHz, CDCl<sub>3</sub>): δ 1.20 (s, 9 H), 2.34 (s, 3 H), 3.88-3.99 (m, 2 H), 4.23-4.34 (m, 2 H), 5.79 (tdd, *J* = 1.2, 5.6, 15.2 Hz, 1 H), 5.86 (dd, *J* = 1.2, 5.6 Hz, 1 H), 5.94 (dtd, *J* = 1.2, 6.4, 15.2 Hz, 1 H), 7.07 (d, *J* = 8.0 Hz, 2 H), 7.22-7.29 (m, 5 H), 7.77 (d, *J* = 8.0 Hz, 2 H). <sup>13</sup>C NMR (100 MHz, CDCl<sub>3</sub>): δ 21.4, 27.0, 37.0, 38.8, 47.7, 47.8, 63.5, 75.4, 81.4, 85.9, 122.0, 127.8, 128.1, 128.4, 128.8, 129.6, 129.7, 131.5, 135.8, 143.6, 176.9. IR (film): ν 1138, 1160, 1348, 1731, 2216, 2358, 2932, 2974, 3346 cm<sup>-1</sup>. HRMS (ESI) *m/z* calcd. For C<sub>27</sub>H<sub>28</sub>BrNO<sub>4</sub>S (M+Na)<sup>+</sup> 564.0814, found 564.0830.

Preparation of substrates **3a**, **3b**, **3c**, and **3k**.

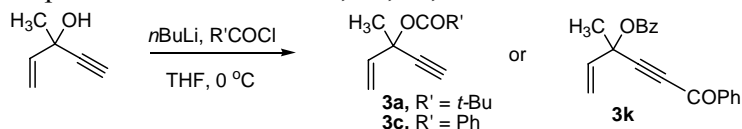

For **3b**, R' = CH<sub>3</sub>, Et<sub>3</sub>N<sub>3</sub>/DMAP/AC<sub>2</sub>O was used for esterification.  
 For **3k**, two equivalents of base (*n*-BuLi) and benzoyl chloride were used.

To a solution of commercially available 3-methyl-pent-1-en-4-yn-3-ol (1.92 g, 20 mmol) in THF (80 mL) was added *n*BuLi (12.5 mL, 20 mmol, 1.6 M in hexane) dropwise at 0 °C. After stirring for 20 min, a solution of pivaloyl chloride (2.4 g, 20 mmol) in THF (15 mL) was added. The reaction mixture was stirred at rt for 5 h. It was then quenched by saturated ammonium chloride and extracted with diethyl ether. The organic solution was washed with brine, dried over anhydrous Na<sub>2</sub>SO<sub>4</sub>. The solvent was evaporated under vacuum and the residue was purified by flash column chromatography (silica gel, hexane/ethyl acetate 30:1) to provide the desired product **3a** (2.6 g) in 73% yield as an oil.

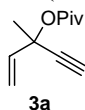

3-methylpent-1-en-4-yn-3-yl pivalate (**3a**).

oil. (2.6 g) <sup>1</sup>H NMR (400 MHz, CDCl<sub>3</sub>): δ 1.20 (s, 9 H), 1.70 (s, 3 H), 2.65 (s, 1 H), 5.23 (dd, *J* = 0.8, 10.4 Hz, 1 H), 5.57 (dd, *J* = 0.8, 16.8 Hz, 1 H), 5.96 (dd, *J* = 10.4, 16.8 Hz, 1 H). <sup>13</sup>C NMR (100 MHz, CDCl<sub>3</sub>): δ 27.0, 28.3, 39.0, 73.5, 74.4, 82.3, 115.3, 138.6, 176.3. IR (film): ν 928, 1062, 1136, 1281, 1367, 1479, 1738, 2971, 3271 cm<sup>-1</sup>. HRMS (ESI) *m/z* calcd. For C<sub>11</sub>H<sub>16</sub>O<sub>2</sub> (M+Na)<sup>+</sup> 203.1042, found 203.1044.

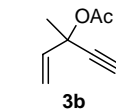

3-methylpent-1-en-4-yn-3-yl acetate (**3b**) is a known compound.<sup>7</sup>

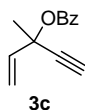

3-methylpent-1-en-4-yn-3-yl benzoate (**3c**).

Compound **3c** (760 mg) was prepared in 76% yield according to procedures described for **3a** by using benzoyl chloride instead of pivaloyl chloride. (silica gel, hexane/ethyl acetate 20:1), oil. <sup>1</sup>H NMR (400 MHz, CDCl<sub>3</sub>): δ 1.86 (s, 3 H), 2.73 (s, 1 H), 5.31 (dd, *J* = 0.8, 10.4 Hz, 1 H), 5.69 (dd, *J* = 0.8, 17.2 Hz, 1 H), 6.11 (dd, *J* = 10.4, 17.2 Hz, 1 H), 7.41-7.45 (m, 2 H), 7.53-7.57 (m, 1 H), 8.02-8.04 (m, 2 H). <sup>13</sup>C NMR (100 MHz, CDCl<sub>3</sub>): δ 28.6, 74.5, 75.1, 82.0, 115.9, 128.3, 129.6, 130.5, 133.0, 138.4, 164.5. IR (film): ν 707, 932, 1060, 1095, 1270, 1451, 1722, 2990, 3295 cm<sup>-1</sup>. HRMS (ESI) *m/z* calcd. For C<sub>13</sub>H<sub>12</sub>O<sub>2</sub> (M+Na)<sup>+</sup> 223.0729, found 223.0732.

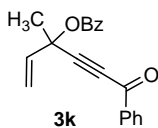

3-methyl-6-oxo-6-phenylhex-1-en-4-yn-3-yl benzoate (**3k**).

Compound **3k** (360 mg) was prepared in 38% yield according to procedures described for **3a** by using benzoyl chloride (2 equiv) and <sup>n</sup>BuLi (2 equiv). (silica gel, hexane/ethyl acetate 4:1), oil. <sup>1</sup>H NMR (400MHz, CDCl<sub>3</sub>) δ 1.98 (s, 3H), 5.40 (d, *J*= 10.8 Hz, 1H), 5.74 (d, *J*= 17.2 Hz, 1H), 6.17 (dd, *J*= 10.4, 17.2 Hz, 1H), 7.44-7.50 (m, 4H), 7.56-7.62 (m, 2H), 8.04-8.10(m, 2H), 8.14-8.20 (m, 2H); <sup>13</sup>C NMR (100MHz, CDCl<sub>3</sub>) δ 27.9, 74.0, 84.3, 91.5, 116.9, 128.4, 128.6, 129.68, 129.71, 130.1, 133.3, 134.2, 136.6, 137.3, 164.4, 177.6. IR (film): ν 700, 736, 850, 934, 1023, 1065, 1093, 1174, 1261, 1313, 1450, 1598, 1645, 1724 cm<sup>-1</sup>. HRMS (ESI) *m/z* calcd. For C<sub>20</sub>H<sub>16</sub>O<sub>3</sub> (M+Na)<sup>+</sup> 327.0991, found 327.0993.

Preparation of substrates **3d**, **3h**, **3l**, **3m**, and **3n**.

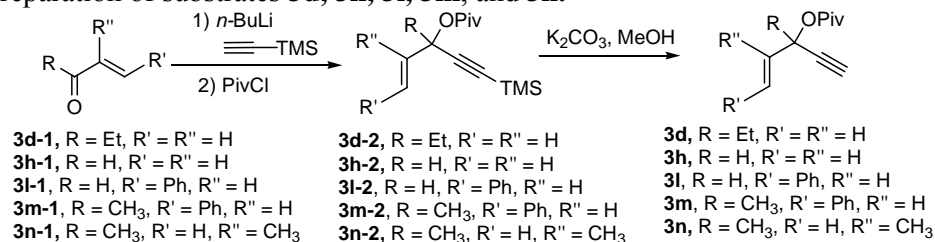

Procedure for the preparation of **3d**: To a stirred solution of trimethylsilylacetylene (1.41mL, 10 mmol) in THF (30 mL) was added *n*BuLi (6.25 mL, 10 mmol, 1.6 M in hexane) at -78 °C. The reaction mixture was warmed to 0 °C and stirred for 15 min. A solution of 1-penten-3-one **3d-1** (840 mg, 10 mmol) in THF (10 mL) was then added at -78 °C. The solution was stirred for 1 h. To this reaction mixture was added pivaloyl chloride (1.2 g, 10 mmol) and the solution was warmed to rt. The solution was stirred for another 3h, quenched with saturated ammonium chloride, and extracted with diethyl ether. The combined organic layer was washed with brine and dried over anhydrous Na<sub>2</sub>SO<sub>4</sub>. The solvent was evaporated and the residue was purified by flash column chromatography (silica gel, Hexane/ Et<sub>3</sub>N = 60:1) to provide product **3d-2** (1.48 g) in 56% yield.

To a stirred solution of K<sub>2</sub>CO<sub>3</sub> (221 mg, 1.6 mmol) in MeOH (16 mL) was added **3d-2** (425 mg, 1.6 mmol) and the solution was stirred for 2h at rt. The organic solvent was evaporated under reduced pressure and the residue was diluted with diethyl ether (30 mL). The solution was washed with H<sub>2</sub>O, brine, and dried over anhydrous Na<sub>2</sub>SO<sub>4</sub>. The solvent was removed under reduced pressure, and the residue was purified by flash chromatography (silica gel, Hexane/Et<sub>3</sub>N = 50:1) to provide the desired product **3d** (270 mg) in 87% yield as an oil.

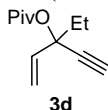

3-ethylpent-1-en-4-yn-3-yl pivalate (**3d**).

Oil. (270 mg) <sup>1</sup>H NMR (400 MHz, CDCl<sub>3</sub>): δ 1.02 (t, *J* = 7.2 Hz, 3 H), 1.20 (s, 9 H), 1.85 (m, 1 H), 1.99 (m, 1 H), 2.65 (s, 1 H), 5.27 (dd, *J* = 0.8, 10.4 Hz, 1 H), 5.56 (dd, *J* = 0.8, 16.4 Hz, 1 H), 5.83 (dd, *J* = 10.4, 16.4 Hz, 1 H). <sup>13</sup>C NMR (100 MHz, CDCl<sub>3</sub>): δ 8.1, 27.0, 34.1, 39.1, 75.3, 77.4, 81.1, 116.3, 137.5, 176.2. IR (film): ν 936, 1152, 1278,

1479, 1740, 2360, 2976, 3286,  $\text{cm}^{-1}$ . HRMS (ESI)  $m/z$  calcd. For  $\text{C}_{12}\text{H}_{18}\text{O}_2$  ( $\text{M}+\text{Na}$ )<sup>+</sup> 217.1199, found 217.1210.

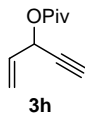

4-ethynyl-2,2-dimethylhex-5-en-3-one (**3h**).

Compound **3h** (1.05 g) was prepared in 63% yield from acrylaldehyde **3h-1** according to procedures described for **3d**. (silica gel, hexane/ethyl acetate 30:1), oil. <sup>1</sup>H NMR (400 MHz,  $\text{CDCl}_3$ ):  $\delta$  1.23 (s, 9 H), 2.55 (d,  $J = 2.4$  Hz, 1 H), 5.33 (dd,  $J = 1.2, 10.0$  Hz, 1 H), 5.56 (dd,  $J = 1.2, 16.8$  Hz, 1 H), 5.86-5.90 (m, 2 H). <sup>13</sup>C NMR (100 MHz,  $\text{CDCl}_3$ ):  $\delta$  27.0, 38.7, 63.7, 74.8, 79.3, 118.8, 132.6, 177.0. IR (film):  $\nu$  940, 966, 1004, 1139, 1273, 1479, 1731, 2975, 3296  $\text{cm}^{-1}$ . HRMS (ESI)  $m/z$  calcd. For  $\text{C}_{10}\text{H}_{14}\text{O}_2$  ( $\text{M}+\text{Na}$ )<sup>+</sup> 189.0886, found 189.0885.

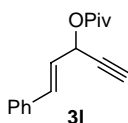

(*E*)-1-phenylpent-1-en-4-yn-3-yl pivalate (**3i**) is a known compound.<sup>7</sup>

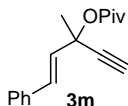

(*E*)-3-methyl-1-phenylpent-1-en-4-yn-3-yl pivalate (**3m**).

Compound **3m** (330 mg) was prepared in 38% yield from (*E*)-4-phenylbut-3-en-2-one **3m-1** according to procedures described for **3d**. (silica gel, hexane/ $\text{Et}_3\text{N}$  20:1), oil. <sup>1</sup>H NMR (400 MHz,  $\text{CDCl}_3$ ):  $\delta$  1.21 (s, 9 H), 1.81 (s, 3 H), 2.72 (s, 1 H), 6.31 (d,  $J = 16.0$  Hz, 1 H), 6.91 (d,  $J = 16.0$  Hz, 1 H), 7.27-7.25 (m, 1 H), 7.34-7.30 (m, 2 H), 7.42-7.40 (m, 2 H). <sup>13</sup>C NMR (100 MHz,  $\text{CDCl}_3$ ):  $\delta$  27.2, 28.9, 39.3, 73.8, 74.9, 82.8, 127.1, 128.3, 128.8, 130.0, 131.1, 136.3, 176.6. IR (film):  $\nu$  1147, 1279, 1478, 1735, 2973, 3292  $\text{cm}^{-1}$ . HRMS (ESI)  $m/z$  calcd for  $\text{C}_{17}\text{H}_{20}\text{O}_2$  ( $\text{M}+\text{Na}$ )<sup>+</sup> 279.1355, found 279.1356.

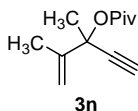

2,3-dimethylpent-1-en-4-yn-3-yl pivalate (**3n**).

Compound **3n** (403 mg) was prepared in 52% yield from 3-methylbut-3-en-2-one **3n-1** according to procedures described for **3d**. (silica gel, hexane/ $\text{Et}_3\text{N}$  30:1), oil. <sup>1</sup>H NMR (500 MHz,  $\text{CDCl}_3$ ):  $\delta$  1.25 (s, 9 H), 1.76 (s, 3 H), 1.85 (s, 3 H), 2.66 (s, 1 H), 5.00 (s, 1 H), 5.37 (s, 1 H). <sup>13</sup>C NMR (100 MHz,  $\text{CDCl}_3$ ):  $\delta$  18.1, 27.2, 28.0, 39.2, 74.4, 76.0, 83.2, 112.4, 144.8, 176.3. IR (film):  $\nu$  1150, 1282, 1479, 1741, 2360, 2960, 3269  $\text{cm}^{-1}$ . HRMS (ESI)  $m/z$  calcd for  $\text{C}_{12}\text{H}_{18}\text{O}_2$  ( $\text{M}+\text{Na}$ )<sup>+</sup> 217.1199, found 217.1198.

Preparation of substrates **3e**, **3f** and **3g**.

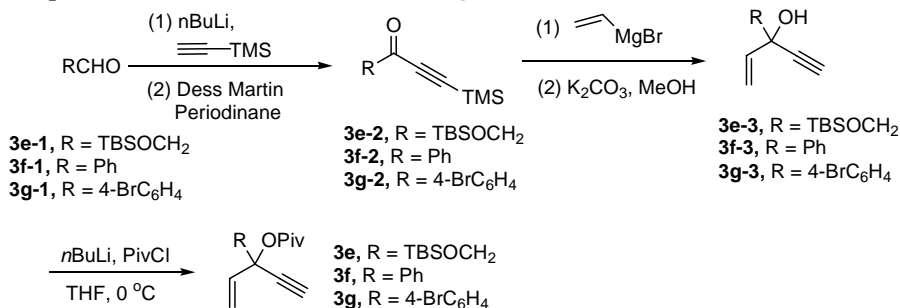

Procedure for substrate **3e**: To a stirred solution of trimethylsilylacetylene (280 mg, 2.8 mmol) in THF (14 mL, 0.2 M) at  $-78^\circ\text{C}$ , was added *n*BuLi (1.8 mL, 1.6 M in THF, 2.8 mmol). The reaction mixture was warmed to  $0^\circ\text{C}$  and stirred for 15 min. A solution of aldehyde **3e-1** (2.8 mmol) in THF (6 mL) was then added at  $-78^\circ\text{C}$ . After stirring at  $-78^\circ\text{C}$  for 1h, the reaction mixture was diluted with Et<sub>2</sub>O (10 mL), quenched by water (10 mL), and extracted with Et<sub>2</sub>O (3x20 mL). The combined organic layers were dried over Na<sub>2</sub>SO<sub>4</sub> and concentrated under reduced pressure. The crude product was used for the next step without purification.

To a solution of the above alcohol (2.8 mmol) in DCM (14 mL, 0.2 M) at  $0^\circ\text{C}$  was added Dess-Martin periodinane (1.4 g, 3.4 mmol). The reaction was stirred at  $0^\circ\text{C}$  for 1.5 h and was filtered to remove the solid. The filtrate was concentrated under reduced pressure. The crude product was purified by flash column chromatography (silica gel, hexane/ethyl acetate 20:1) to give a TMS-protected ynone **3e-2** in 71% yield for 2 steps. To a solution of ketone **3e-2** (2 mmol) in THF (12 mL) was added vinyl Grignard reagent (2.86 mL, 2 mmol) dropwise at  $-78^\circ\text{C}$ . After stirring for 4 h, the reaction mixture was quenched by saturated ammonium chloride and extracted with diethyl ether. The combined organic layers were dried over Na<sub>2</sub>SO<sub>4</sub> and concentrated under reduced pressure. The crude product was used for the next step without purification.

To a solution of the above crude product in MeOH (20 mL) was added K<sub>2</sub>CO<sub>3</sub> (276 mg, 2 mmol). The reaction was stirred at rt for 1 h. The organic solvent was removed under reduced pressure. The resulting aqueous solution was extracted with diethyl ether, dried over Na<sub>2</sub>SO<sub>4</sub>, and concentrated under reduced pressure. The crude product was purified by flash column chromatography to give product **3e-3** (375 g) in 83% yield over 2 steps.

To a solution of alcohol **3e-3** (375 g, 1.66 mmol) in THF was added *n*BuLi (1.1 mL, 1.66 mmol, 1.6 M in hexane) dropwise at  $0^\circ\text{C}$ . After stirring for 20 min, pivaloyl chloride (200 mg, 1.66 mmol) was added. The reaction mixture was stirred at rt for 5 h before quenching by saturated ammonium chloride and extracted with diethyl ether. The solvent was evaporated and the residue was purified by flash column chromatography using neutral aluminum oxide (the aluminum oxide was treated by 20% Et<sub>3</sub>N in hexane for 0.5h. Hexane/NEt<sub>3</sub>/EtOAc = 30:2:1) to provide the desired product **3e** (442 mg) in 86% yield as an oil.

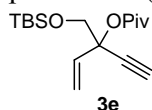

3-((tert-butyltrimethylsilyloxy)methyl)pent-1-en-4-yn-3-yl pivalate (**3e**).

oil. (442 mg)  $^1\text{H}$  NMR (400 MHz,  $\text{CDCl}_3$ ):  $\delta$  0.06 (s, 6 H), 0.89 (s, 9 H), 1.20 (s, 9 H), 2.63 (s, 1 H), 3.75 (d,  $J = 10.4$  Hz, 1 H), 3.98 (d,  $J = 10.4$  Hz, 1 H), 5.32 (d,  $J = 10.4$  Hz, 1 H), 5.62 (d,  $J = 17.2$  Hz, 1 H), 5.94 (dd,  $J = 10.8, 17.2$  Hz, 1 H).  $^{13}\text{C}$  NMR (100 MHz,  $\text{CDCl}_3$ ):  $\delta$  -5.4, -5.5, 18.2, 25.7, 27.0, 39.1, 68.7, 75.8, 79.9, 117.3, 135.3, 176.3. IR (film):  $\nu$  1136, 1255, 1477, 1742, 2957, 3270  $\text{cm}^{-1}$ . HRMS (ESI)  $m/z$  calcd for  $\text{C}_{17}\text{H}_{30}\text{O}_3\text{Si}(\text{M}+\text{Na})^+$  333.1856, found 333.1856.

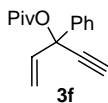

3-phenylpent-1-en-4-yn-3-yl pivalate (**3f**).

Compound **3f** (335 mg) was prepared in 46% yield from benzaldehyde **3f-1** according to procedures described for **3e**. (the aluminum oxide was treated by 20%  $\text{Et}_3\text{N}$  in hexane for 0.5h. Hexane/ $\text{NEt}_3$ / $\text{EtOAc} = 30:2:1$ ), oil.  $^1\text{H}$  NMR (400 MHz,  $\text{CDCl}_3$ ):  $\delta$  1.24 (s, 9 H), 2.90 (s, 1 H), 5.26 (dd,  $J = 0.8, 10.4$  Hz, 1 H), 5.58 (dd,  $J = 0.8, 16.8$  Hz, 1 H), 6.05 (dd,  $J = 10.4, 16.8$  Hz, 1 H), 7.32 (m, 1 H), 7.35 (m, 2 H), 7.56 (m, 2 H).  $^{13}\text{C}$  NMR (100 MHz,  $\text{CDCl}_3$ ):  $\delta$  27.0, 39.2, 77.5, 77.6, 80.6, 115.3, 125.6, 128.1, 128.3, 138.6, 140.2, 175.5. IR (film):  $\nu$  3284, 2973, 1742, 1277, 1132, 979, 934, 762, 696  $\text{cm}^{-1}$ . HRMS (ESI)  $m/z$  calcd. For  $\text{C}_{16}\text{H}_{18}\text{O}_2(\text{M}+\text{Na})^+$  265.1199, found 265.1204.

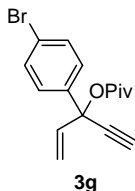

3-(4-bromophenyl)pent-1-en-4-yn-3-yl pivalate (**3g**).

Compound **3g** (512 mg) was prepared in 53% yield from 4-bromobenzaldehyde **3g-1** according to procedures described for **3e**. (the aluminum oxide was treated by 20%  $\text{Et}_3\text{N}$  in hexane for 0.5h. Hexane/ $\text{NEt}_3$ / $\text{EtOAc} = 30:2:1$ ), oil.  $^1\text{H}$  NMR (400 MHz,  $\text{CDCl}_3$ ):  $\delta$  1.23 (s, 9 H), 2.91 (s, 1 H), 5.27 (d,  $J = 10.4$  Hz, 1 H), 5.56 (d,  $J = 17.2$  Hz, 1 H), 6.01 (dd,  $J = 10.4, 17.2$  Hz, 1 H), 7.44 (d,  $J = 8.0$  Hz, 2 H),  $\delta$  7.48 (d,  $J = 8.4$  Hz, 2 H).  $^{13}\text{C}$  NMR (100 MHz,  $\text{CDCl}_3$ ):  $\delta$  26.9, 39.2, 77.9, 80.1, 115.7, 122.3, 127.5, 131.5, 138.2, 139.4, 175.4. IR (film):  $\nu$  1132, 1277, 1479, 1742, 2974, 3296  $\text{cm}^{-1}$ . HRMS (ESI)  $m/z$  calcd for  $\text{C}_{16}\text{H}_{17}\text{BrO}_2(\text{M}+\text{Na})^+$  343.0304, found 343.0308.

Preparation of substrate **3j**.

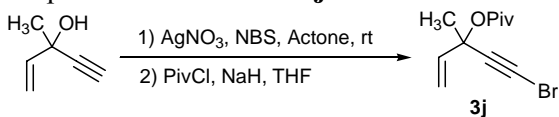

To a solution of  $\text{AgNO}_3$  (100 mg, 0.6 mmol, 10 %) in acetone (30 mL) was added commercially available 3-methyl-pent-1-en-4-yn-3-ol (576 mg, 6 mmol). After stirring at rt for 10 min, NBS (7.2 mmol, 1.2 equiv) was added. The reaction mixture was stirred at rt until no starting material was left as indicated by TLC. The reaction mixture was filtered through a small pad of celite. The filtrate was concentrated under reduced

pressure and the residue was purified by flash column chromatography (silica gel, hexane/ethyl acetate 4:1) to give bromopropargyl alcohol as an oil (887 mg, 85%).

To a solution of NaH (280 mg, 7 mmol) in THF (20 mL) was added a solution of the above bromopropargyl alcohol (870 mg, 5 mmol) in THF (10 mL). The mixture solution was stirred at rt for 30 min. To this solution was added pivaloyl chloride (840 mg, 7 mmol) in THF (10 mL). The reaction was stirred at rt overnight, quenched by H<sub>2</sub>O, diluted with Et<sub>2</sub>O (50 mL), washed with H<sub>2</sub>O, brine, dried over MgSO<sub>4</sub> and concentrated under reduced pressure. The crude was purified by flash chromatography on silica gel (hexane/ethyl acetate 20:1) to give **3j** (1.05 g, 82%) as an oil.

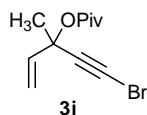

1-bromo-3-methylpent-4-en-1-yn-3-yl pivalate (**3j**).

oil. (1.05 g) <sup>1</sup>H NMR (500 MHz, CDCl<sub>3</sub>) δ 1.19 (s, 9 H), 1.69 (s, 3 H), 5.21 (dd, *J* = 10.44, 0.73 Hz, 1 H), 5.51 (dd, *J* = 17.03, 0.70 Hz, 1 H), 5.93 (dd, *J* = 17.00, 10.44 Hz, 1 H). <sup>13</sup>C NMR (125 MHz, CDCl<sub>3</sub>) δ 27.3, 28.4, 39.3, 47.1, 74.6, 78.9, 115.6, 138.8, 176.4. IR (filv): ν 2981, 2935, 2873, 2360, 2341, 2216, 1736, 1479, 1460, 1397, 1368, 1281, 1136, 1062, 1029, 984, 923, 867, 819, 768, 735, 689 cm<sup>-1</sup>. HRMS (ESI) for C<sub>11</sub>H<sub>15</sub>BrO<sub>2</sub> (M+Na), 281.0148 (calc.), found 281.0144.

Preparation of substrates **3p**.

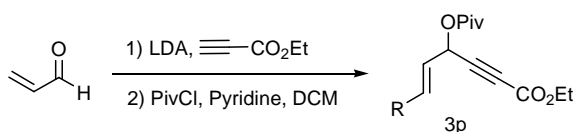

To a stirred solution of diisopropylamine (17 mmol, 1.7 equiv) in THF (40 mL) was added a solution of *n*-butyllithium (1.6 M in hexanes, 10.6 mL, 17 mmol, 1.7 equiv) slowly at -78 °C. The mixture was stirred at -78 °C for 15 min and then for 30 min at 0 °C. The mixture was cooled to -78 °C and ethyl propiolate (15 mmol, 1.5 equiv) was added. After stirring for 30 min at -78 °C, a solution of acrolein (10 mmol, 1.0 equiv) in THF (20 mL) was added. After stirring at -78 °C for 3 h, the reaction mixture was added to a saturated ammonium chloride solution at 0 °C. The aqueous phase was extracted with Et<sub>2</sub>O, the combined organic layers were washed with brine, dried over MgSO<sub>4</sub> and the solvents were removed under reduced pressure to give an oil.

To a solution of above oil (770 mg, 5 mmol, 1.0 equiv) in CH<sub>2</sub>Cl<sub>2</sub> (30 mL) was added pyridine (1.18 g, 3 equiv), DMAP (one crystal) and pivaloyl chloride (900 mg, 1.5 equiv) at 0 °C. After stirring for overnight, the mixture was diluted with CH<sub>2</sub>Cl<sub>2</sub> (30 mL), washed with a 10% copper sulfate aqueous solution and brine, dried over MgSO<sub>4</sub>, and concentrated under reduced pressure. The crude was purified by flash chromatography on silica gel (hexane/ethyl acetate 10:1) to give **3p** (840 mg, 71%).

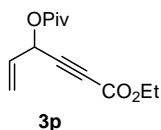



ethyl 4-(pivaloyloxy)hex-5-en-2-ynoate (**3p**).

oil. (840 mg)  $^1\text{H NMR}$  (500 MHz,  $\text{CDCl}_3$ ):  $\delta$  1.23 (s, 9 H), 1.32 (t,  $J = 7.0$  Hz, 3 H), 4.25 (q,  $J = 7.0$  Hz, 2 H), 5.37 (d,  $J = 10.0$  Hz, 1 H), 5.56 (d,  $J = 17$  Hz, 1 H), 5.85-5.91 (m, 1 H), 5.97 (td,  $J = 1.0, 5.5$  Hz, 1 H).  $^{13}\text{C NMR}$  (125 MHz,  $\text{CDCl}_3$ ):  $\delta$  14.0, 27.0, 38.8, 62.2, 63.2, 77.8, 81.9, 119.8, 131.2, 153.0, 176.8. IR (film):  $\nu$  975, 1131, 1244, 1462, 1715, 1737, 2244, 2978  $\text{cm}^{-1}$ . HRMS (ESI)  $m/z$  calcd. For  $\text{C}_{13}\text{H}_{18}\text{O}_4$  ( $\text{M}+\text{Na}$ ) $^+$  261.1097, found 261.1103.

Hydrolysis of cycloheptatriene **2b** to dienone **18**.

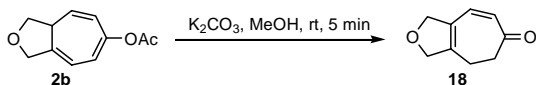

To a solution of cycloheptatriene **2b** (0.2 mmol) in MeOH (6 mL) was added  $\text{K}_2\text{CO}_3$  (41 mg, 0.3 mmol). After stirring at room temperature for 5 min,  $\text{H}_2\text{O}$  (30 mL) was added and extracted with ethyl acetate. The organic phase was washed with  $\text{H}_2\text{O}$ , brine, dried over anhydrous  $\text{Na}_2\text{SO}_4$ , and concentrated in vacuo. The residue was purified by column chromatography (silica gel, hexane/ethyl acetate 4:1) to afford dienone **18** (25 mg, 83% yield) as an oil.

(*Z*)-4,5-dihydro-1H-cyclohepta[*c*]furan-6(3H)-one (**18**).

Oil.  $^1\text{H NMR}$  (400 MHz,  $\text{CDCl}_3$ ):  $\delta$  2.40 (t,  $J = 6.4$  Hz, 2 H), 2.73-2.77 (m, 2 H), 4.80 (s, 2 H), 4.81 (s, 2 H), 6.14 (d,  $J = 12.0$  Hz, 1 H), 6.45 (d,  $J = 12.4$  Hz, 1 H).  $^{13}\text{C NMR}$  (100 MHz,  $\text{CDCl}_3$ ):  $\delta$  19.7, 40.1, 78.0, 79.2, 129.8, 131.4, 131.7, 144.7, 199.9. IR (film):  $\nu$  793, 1058, 1595, 1644, 1662, 2840  $\text{cm}^{-1}$ . HRMS (ESI)  $m/z$  calcd. For  $\text{C}_9\text{H}_{10}\text{O}_2$  ( $\text{M}+\text{H}$ ) $^+$  151.0754, found 151.0753.

Procedure for the conversion of product **5g** to compound **24**.

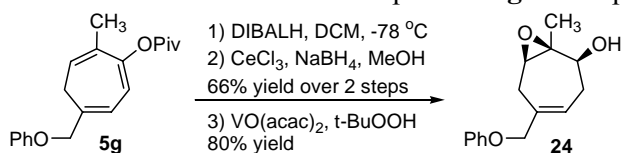

To a stirred solution of **5g** (312 mg, 1 mmol) in DCM (20 mL) at  $-78$   $^\circ\text{C}$  was added DIBALH (4 mL, 4 mmol, 1 M in hexane) dropwise. The reaction mixture was stirred at the same temperature for 30 min and was quenched with  $\text{H}_2\text{O}$  (200 mg, 11 mmol). When the temperature was reached at  $0$   $^\circ\text{C}$ , MeOH (20 mL) was added. To this solution,  $\text{CeCl}_3$  (369 mg, 4.5 mmol) and  $\text{NaBH}_4$  (111 mg, 12 mmol) was then added. The reaction mixture was stirred for 10 min and quenched with aqueous HCl solution (1M). The solution was diluted with DCM (40 mL), washed with  $\text{H}_2\text{O}$ , brine and dried with  $\text{Na}_2\text{SO}_4$ . The solvent was removed under reduced pressure. The residue was purified by column chromatography on silica gel to give an allylic alcohol (152 mg, 66% yield).

To a solution of  $\text{VO}(\text{acac})_2$  (8 mg, 5 mol %) and the above allylic alcohol (143 mg, 0.62 mmol) in 20 mL of dry benzene at rt was added *t*-BuOOH (0.23 mL, 5.5 M in decane). The resulting solution was stirred for 24 h at  $40$   $^\circ\text{C}$ . The reaction mixture was quenched with  $\text{Na}_2\text{S}_2\text{O}_3$  and filtered with celite. The solvent was removed under reduced pressure

and the residue was purified by chromatography on silica gel to give epoxide **24** (121 mg, 80 %).

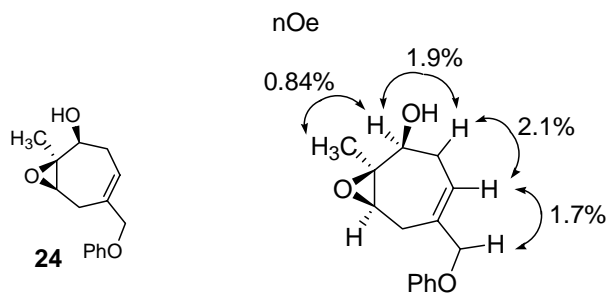

1-methyl-5-phenoxyethyl-8-oxa-bicyclo[5.1.0]oct-4-en-2-ol (**24**).

oil. <sup>1</sup>H NMR (500 MHz, CDCl<sub>3</sub>): δ 1.35 (s, 3 H), 2.12 (d, *J* = 6.0 Hz, 1 H), 2.38 (dd, *J* = 5.5, 5.5 Hz, 2 H), 2.70 (dd, *J* = 4.5, 16.5 Hz, 1 H), 2.76 (dd, *J* = 6.0, 16.0 Hz, 1 H), 3.19 (t, *J* = 6.0 Hz, 1 H), 3.83 (td, *J* = 5.5, 5.5 Hz, 1 H), 4.39 (s, 2 H), 5.73 (t, *J* = 6.0 Hz, 1 H), 6.90 (d, *J* = 8.0 Hz, 2 H), 6.95 (t, *J* = 7.5 Hz, 1 H), 7.25-7.29 (m, 2 H). <sup>13</sup>C NMR (125 MHz, CDCl<sub>3</sub>): δ 21.9, 28.6, 31.8, 61.9, 63.1, 69.4, 72.8, 114.9, 121.0, 124.7, 129.4, 135.1, 158.5. IR (film): ν 690, 753, 1027, 1238, 1454, 1493, 1597, 2360, 2850, 2918, 3418 cm<sup>-1</sup>. HRMS (ESI) *m/z* calcd. For C<sub>15</sub>H<sub>18</sub>O<sub>3</sub> (M+Na)<sup>+</sup> 269.1148, found 269.1150.

See procedures for the preparation of bicyclic products via Rh-catalyzed intramolecular [5+2] cycloaddition with concomitant 1,2-acyloxy migration in the experimental section of the manuscript.

Characterization data for products derived from intramolecular reaction:

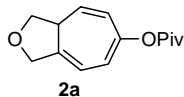

3,8a-dihydro-1H-cyclohepta[c]furan-6-yl pivalate (**2a**).

Yield : 85%, 40 mg, oil.  $^1\text{H}$  NMR (500 MHz,  $\text{CDCl}_3$ ):  $\delta$  1.29 (s, 9 H), 2.67-2.69 (m, 1 H), 4.09 (dd,  $J = 4.8, 9.2$  Hz, 1 H), 4.29 (dd,  $J = 7.2, 9.2$  Hz, 1 H), 4.41 (d,  $J = 14.4$  Hz, 1 H), 4.47 (d,  $J = 14.4$  Hz, 1 H), 5.22 (dd,  $J = 4.4, 9.6$  Hz, 1 H), 5.91 (d,  $J = 9.6$  Hz, 1 H), 6.06-6.09 (m, 1 H), 6.32 (d,  $J = 6.4$  Hz, 1 H).  $^{13}\text{C}$  NMR (125 MHz,  $\text{CDCl}_3$ ):  $\delta$  27.3, 39.1, 43.2, 71.0, 74.7, 112.3, 120.1, 123.7, 125.7, 139.5, 150.6, 177.7. IR (film):  $\nu$  912, 1124, 1277, 1480, 1742, 2872, 2972  $\text{cm}^{-1}$ . HRMS (ESI)  $m/z$  calcd. For  $\text{C}_{14}\text{H}_{18}\text{O}_3$  ( $\text{M}+\text{Na}$ ) $^+$  257.1148, found 257.1145.

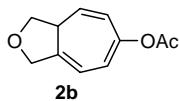

3,8a-dihydro-1H-cyclohepta[c]furan-6-yl acetate (**2b**).

Yield : 81%, 31 mg, oil.  $^1\text{H}$  NMR (400 MHz,  $\text{CDCl}_3$ ):  $\delta$  2.20 (s, 3 H), 2.64-2.67 (m, 1 H), 4.09 (dd,  $J = 4.8, 9.2$  Hz, 1 H), 4.28 (dd,  $J = 7.2, 9.2$  Hz, 1 H), 4.40 (d,  $J = 14.0$  Hz, 1 H), 4.46 (d,  $J = 14.0$  Hz, 1 H), 5.21 (dd,  $J = 4.8, 10.0$  Hz, 1 H), 5.96 (d,  $J = 9.6$  Hz, 1 H), 6.06-6.09 (m, 1 H), 6.34-6.36 (m, 1 H).  $^{13}\text{C}$  NMR (100 MHz,  $\text{CDCl}_3$ ):  $\delta$  21.0, 42.9, 70.7, 74.5, 112.0, 120.1, 123.5, 125.3, 139.4, 150.0, 169.9. IR (film):  $\nu$  913, 1120, 1211, 1411, 1750, 2852, 2925  $\text{cm}^{-1}$ . HRMS (ESI)  $m/z$  calcd. For  $\text{C}_{11}\text{H}_{12}\text{O}_3$  ( $\text{M}+\text{Na}$ ) $^+$  215.0678, found 215.0682.

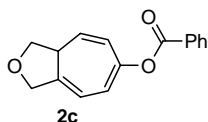

3,8a-dihydro-1H-cyclohepta[c]furan-6-yl benzoate (**2c**).

Yield : 83%, 42 mg, oil.  $^1\text{H}$  NMR (400 MHz,  $\text{CDCl}_3$ ):  $\delta$  2.75-2.77 (m, 1 H), 4.13 (dd,  $J = 4.4, 8.8$  Hz, 1 H), 4.32 (dd,  $J = 7.2, 8.8$  Hz, 1 H), 4.45 (d,  $J = 14$  Hz, 1 H), 4.50 (d,  $J = 14$  Hz, 1 H), 5.27 (dd,  $J = 4.4, 9.6$  Hz, 1 H), 6.08 (td,  $J = 1.2, 9.6$  Hz, 1 H), 6.12-6.15 (m, 1 H), 6.50 (d,  $J = 6.8$  Hz, 1 H), 7.47-7.51 (m, 2 H), 7.59-7.64 (m, 1 H), 8.12-8.15 (m, 2 H).  $^{13}\text{C}$  NMR (100 MHz,  $\text{CDCl}_3$ ):  $\delta$  43.0, 70.7, 74.5, 112.1, 120.3, 123.6, 125.5, 128.5, 129.6, 130.0, 133.4, 139.5, 150.3, 165.4. IR (film):  $\nu$  705, 914, 1122, 1314, 1729, 2360, 2854, 2941  $\text{cm}^{-1}$ . HRMS (ESI)  $m/z$  calcd. For  $\text{C}_{16}\text{H}_{14}\text{O}_3$  ( $\text{M}+\text{Na}$ ) $^+$  277.0835, found 277.0834.

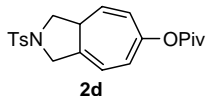

1,2,3,3a-tetrahydro-2-tosylcyclohepta[c]pyrrol-6-yl pivalate (**2d**).

Yield : 96%, 74 mg, solid, mp: 93-95 °C.  $^1\text{H}$  NMR (400 MHz,  $\text{CDCl}_3$ ):  $\delta$  1.27 (s, 9 H), 2.45 (s, 3 H), 2.51-2.52 (m, 1 H), 3.50 (dd,  $J = 7.6, 10.0$  Hz, 1 H), 3.57 (dd,  $J = 3.2, 10.0$  Hz, 1 H), 3.86 (d,  $J = 14.4$  Hz, 1 H), 3.99 (d,  $J = 14.8$  Hz, 1 H), 5.16 (dd,  $J = 4.8, 10.0$  Hz, 1 H), 5.87 (d,  $J = 9.6$  Hz, 1 H), 6.03-6.05 (m, 1 H), 6.26 (d,  $J = 6.4$  Hz, 1 H), 7.35 (d,  $J = 8.4$  Hz, 2 H), 7.72-7.75 (m, 2 H).  $^{13}\text{C}$  NMR (100 MHz,  $\text{CD}_3\text{COCD}_3$ ):  $\delta$  22.0, 27.8, 39.9, 43.0, 53.2, 55.2, 116.2, 121.1, 124.9, 127.0, 129.6, 131.2, 133.7, 135.9, 145.4, 152.2, 177.7. IR (film):  $\nu$  814, 1137, 1161, 1347, 1742, 2974  $\text{cm}^{-1}$ . HRMS (ESI)  $m/z$  calcd. For  $\text{C}_{21}\text{H}_{25}\text{NO}_4\text{S}$  ( $\text{M}+\text{Na}$ ) $^+$  410.1396, found 410.1392.

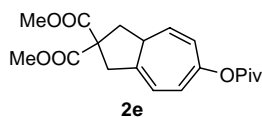

Dimethyl 6-(pivaloyloxy)-3,3a-dihydroazulene-2,2(1H)-dicarboxylate (**2e**).

Yield : 75%, 52 mg, oil. (5 mol % of  $[\text{Rh}(\text{COD})_2]\text{BF}_4$ )  $^1\text{H}$  NMR (400MHz,  $\text{CDCl}_3$ )  $\delta$  1.27 (s, 9H), 2.43 (dd,  $J = 6.8, 13.2$  Hz, 1H), 2.64-2.73 (m, 1H), 2.91 (dd,  $J = 8.4, 13.2$  Hz, 1H), 3.14 (s, 2H), 3.73 (s, 3H), 3.74 (s, 3H), 5.15 (dd,  $J = 4.8, 9.6$  Hz, 1H), 5.80 (td,  $J = 1.6, 10.0$  Hz, 1H), 6.04-6.09 (m, 1H), 6.17-6.22 (m, 1H);  $^{13}\text{C}$  NMR (100Mz,  $\text{CDCl}_3$ )  $\delta$  27.3, 39.1, 40.5, 41.0, 41.8, 53.1, 53.1, 61.0, 115.8, 120.0, 123.2, 128.4, 139.8, 150.5, 171.7, 171.8, 177.6. IR ( film ): 705, 738, 910, 1072, 1132, 1203, 1268, 1437, 1483, 1736, 2959  $\text{cm}^{-1}$ . HRMS (ESI)  $m/z$  calcd. For  $\text{C}_{19}\text{H}_{24}\text{O}_6$  ( $\text{M}+\text{Na}$ ) $^+$  371.1465, found 371.1484.

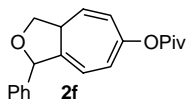

3,3a-dihydro-1-phenyl-1H-cyclohepta[c]furan-6-yl pivalate (**2f**).

Yield : 90%, 56 mg, oil, (dr = 1:1).  $^1\text{H}$  NMR (400 MHz,  $\text{CDCl}_3$ , one isomer):  $\delta$  1.29 (s, 9 H), 2.69 (m, 1 H), 4.25 (dd,  $J = 6.4, 9.2$  Hz, 1 H), 4.35 (dd,  $J = 2.4, 9.2$  Hz, 1 H), 5.38 (dd,  $J = 4.8, 9.6$  Hz, 1 H), 5.46 (s, 1 H), 5.83 (d,  $J = 6.8$  Hz, 1 H), 5.98 (d,  $J = 9.6$  Hz, 1 H), 6.33 (d,  $J = 6.4$ , 1 H), 7.22-7.40 (m, 5 H).  $^1\text{H}$  NMR (400 MHz,  $\text{CDCl}_3$ , the other isomer):  $\delta$  1.29 (s, 9 H), 3.01-3.06 (m, 1 H), 4.03 (dd,  $J = 7.2, 8.8$  Hz, 1 H), 4.64 (dd,  $J = 8.8, 8.8$  Hz, 1 H), 5.27 (dd,  $J = 4.4, 9.6$  Hz, 1 H), 5.33 (s, 1 H), 5.64 (d,  $J = 6.8$  Hz, 1 H), 5.93 (d,  $J = 9.6$  Hz, 1 H), 6.19 (d,  $J = 6.8$  Hz, 1 H), 7.22-7.40 (m, 5 H).  $^{13}\text{C}$  NMR (100 MHz,  $\text{CDCl}_3$ , mixture):  $\delta$  27.0, 38.8, 43.5, 43.6, 73.0, 73.2, 83.2, 83.4, 114.8, 114.9, 119.5, 120.0, 123.6, 123.9, 125.3, 125.9, 127.6, 127.9, 128.1, 128.2, 128.4, 128.5, 139.9, 140.2, 141.8, 143.5, 150.4, 150.7, 177.4. IR (film):  $\nu$  908, 1055, 1134, 1275, 1746, 2872, 2973  $\text{cm}^{-1}$ . HRMS (ESI)  $m/z$  calcd. For  $\text{C}_{20}\text{H}_{22}\text{O}_3$  ( $\text{M}+\text{Na}$ ) $^+$  333.1461, found 333.1457.

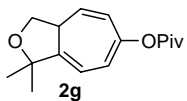

3,3a-dihydro-1,1-dimethyl-1H-cyclohepta[c]furan-6-yl pivalate (**2g**).

Yield : 90%, 47 mg, oil.  $^1\text{H}$  NMR (400 MHz,  $\text{CD}_3\text{COCD}_3$ ):  $\delta$  1.08 (s, 3 H), 1.14 (s, 9 H), 1.26 (s, 3 H), 2.43-2.45 (m, 1 H), 3.92 (dd,  $J = 4.0, 9.2$  Hz, 1 H), 4.12 (dd,  $J = 7.2, 9.2$  Hz,

1 H), 5.16 (dd,  $J = 4.4, 9.6$  Hz, 1 H), 5.77 (td,  $J = 1.6, 9.6$  Hz, 1 H), 5.89 (dd,  $J = 1.6, 6.4$  Hz, 1 H), 6.19-6.22 (m, 1 H).  $^{13}\text{C}$  NMR (100 MHz,  $\text{CD}_3\text{COCD}_3$ ):  $\delta$  27.2, 27.9, 30.3, 39.9, 45.0, 71.2, 82.7, 113.1, 121.2, 124.6, 127.6, 149.5, 151.9, 177.8. IR (film):  $\nu$  841, 1125, 1279, 1750, 2872, 2974  $\text{cm}^{-1}$ . HRMS (ESI)  $m/z$  calcd. For  $\text{C}_{16}\text{H}_{22}\text{O}_3$  ( $\text{M}+\text{Na}$ ) $^+$  285.1461, found 285.1466.

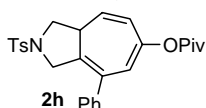

1,2,3,3a-tetrahydro-8-phenyl-2-tosylcyclohepta[c]pyrrol-6-yl pivalate (**2h**).  
Yield : 88%, 81 mg, solid, mp: 126-128 °C. (DCM, 0.025 M)  $^1\text{H}$  NMR (400 MHz,  $\text{CDCl}_3$ ):  $\delta$  1.27 (s, 9 H), 2.46 (s, 3 H), 2.59 (m, 1 H), 3.38 (dd,  $J = 6.8, 9.6$  Hz, 1 H), 3.72 (dd,  $J = 2.0, 9.6$  Hz, 1 H), 3.79 (d,  $J = 15.2$  Hz, 1 H), 3.95 (d,  $J = 15.2$  Hz, 1 H), 5.38 (dd,  $J = 4.8, 9.6$  Hz, 1 H), 5.93 (d,  $J = 10.0$  Hz, 1 H), 6.37 (s, 1 H), 7.14 (d,  $J = 8.4$  Hz, 2 H), 7.27-7.38 (m, 5 H), 7.71 (d,  $J = 8.4$  Hz, 2 H).  $^{13}\text{C}$  NMR (100 MHz,  $\text{CD}_3\text{COCD}_3$ ):  $\delta$  22.0, 27.8, 39.9, 43.3, 52.8, 55.0, 124.37, 124.41, 129.0, 129.58, 129.61, 129.64, 130.0, 130.3, 131.3, 132.9, 133.8, 141.0, 145.5, 152.4, 177.7. IR (film):  $\nu$  1028, 1127, 1162, 1348, 1700, 1747, 2973  $\text{cm}^{-1}$ . HRMS (ESI)  $m/z$  calcd. For  $\text{C}_{27}\text{H}_{29}\text{NO}_4\text{S}$  ( $\text{M}+\text{Na}$ ) $^+$  486.1709, found 486.1699.

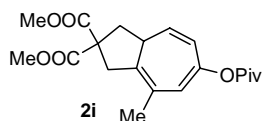

Dimethyl 8-methyl-6-(pivaloyloxy)-3,3a-dihydroazulene-2,2(1H)-dicarboxylate (**2i**).  
Yield : 82%, 59 mg, oil. (DCM, 0.05 M. The amount of metal catalyst and ligand was doubled.)  $^1\text{H}$  NMR (400Mz,  $\text{CDCl}_3$ )  $\delta$  1.27 (s, 9H), 1.86 (s, 3H), 2.50-2.62 (m, 2H), 2.72-2.84 (m, 1H), 3.09 (s, 2H), 3.72 (s, 6H), 5.23 (dd,  $J = 4.4, 9.6$  Hz, 1H), 5.75 (d,  $J = 9.6$  Hz, 1H), 6.17 (s, 1H);  $^{13}\text{C}$  NMR (100Mz,  $\text{CDCl}_3$ )  $\delta$  19.5, 27.3, 39.0, 39.3, 40.1, 41.8, 53.07, 53.13, 60.9, 122.4, 123.3, 124.9, 129.6, 134.4, 149.6, 171.98, 172.03, 177.7. IR ( film ): 703, 736, 905, 1086, 1123, 1231, 1269, 1435, 1734, 2957  $\text{cm}^{-1}$ . HRMS (ESI)  $m/z$  calcd. For  $\text{C}_{20}\text{H}_{26}\text{O}_6$  ( $\text{M}+\text{Na}$ ) $^+$  385.1622, found 385.1610.

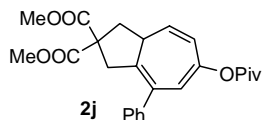

Dimethyl 8-phenyl-6-(pivaloyloxy)-3,3a-dihydroazulene-2,2(1H)-dicarboxylate (**2j**).  
Yield : 70%, 59 mg, oil. (DCM, 0.05 M. The amount of metal catalyst and ligand was doubled.)  $^1\text{H}$  NMR (400Mz,  $\text{CDCl}_3$ )  $\delta$  1.27 (s, 9H), 2.59 (dd,  $J = 5.2, 12.8$  Hz, 1H), 2.74-2.82 (m, 1H), 2.90 (dd,  $J = 8.8, 12.8$  Hz, 1H), 3.05 (d,  $J = 18.8$  Hz, 1H), 3.18 (d,  $J = 17.6$  Hz, 1H), 3.70 (s, 3H), 3.72 (s, 3H), 5.30 (dd,  $J = 4.4, 9.6$  Hz, 1H), 5.85 (td,  $J = 1.6, 9.6$  Hz, 1H), 6.35 (s, 1H), 7.22-7.29 (m, 3H), 7.31-7.37 (m, 2H);  $^{13}\text{C}$  NMR (100 Mz,  $\text{CDCl}_3$ )  $\delta$  27.3, 39.1, 40.2, 40.3, 42.2, 53.0, 53.1, 61.0, 122.8, 124.0, 127.2, 128.5, 128.8, 129.7, 130.0, 136.4, 141.0, 150.1, 171.7, 171.8, 177.6; IR ( film ): 704, 732,

768, 911, 1072, 1124, 1201, 1266, 1436, 1736, 2958  $\text{cm}^{-1}$ . HRMS (ESI)  $m/z$  calcd. For  $\text{C}_{25}\text{H}_{28}\text{O}_6$  ( $\text{M}+\text{Na}$ ) $^+$  447.1778, found 447.1778.

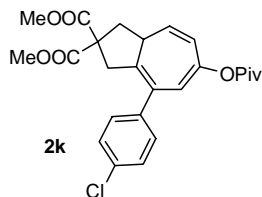

Dimethyl-8-(4-chlorophenyl)-6-(pivaloyloxy)-3,3a-dihydroazulene-2,2(1H)-dicarboxylate (**2k**).

Yield : 60%, 55 mg, oil. (DCM, 0.05 M. The amount of metal catalyst and ligand was doubled.)  $^1\text{H}$  NMR (400Mz,  $\text{CDCl}_3$ )  $\delta$  1.27 (s, 9H), 2.60 (dd,  $J= 4.8, 13.2$  Hz, 1H), 2.72-2.80 (m, 1H), 2.89 (dd,  $J= 8.8, 13.2$  Hz, 1H), 3.01 (d,  $J= 18.0$  Hz, 1H), 3.15 (d,  $J= 17.2$  Hz, 1H), 3.70 (s, 3H), 3.71 (s, 3H), 5.30 (dd,  $J= 4.8, 9.6$  Hz, 1H), 5.85 (td,  $J= 1.6, 9.6$  Hz, 1H), 6.28 (s, 1H), 7.17-7.21 (m, 2H), 7.29-7.35 (m, 2H);  $^{13}\text{C}$  NMR (100 Mz,  $\text{CDCl}_3$ )  $\delta$  27.3, 39.1, 40.1, 40.2, 42.2, 53.1, 53.2, 60.9, 122.9, 123.5, 128.6, 128.7, 130.21, 130.24, 133.1, 136.8, 139.4, 150.4, 171.6, 171.7, 177.6. IR ( film ): 731, 831, 908, 1014, 1121, 1200, 1264, 1434, 1490, 1733, 2956  $\text{cm}^{-1}$ . HRMS (ESI)  $m/z$  calcd. For  $\text{C}_{25}\text{H}_{27}\text{ClO}_6$  ( $\text{M}+\text{Na}$ ) $^+$  481.1388, found 481.1386.

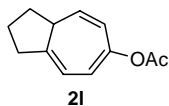

1,2,3,3a-tetrahydroazulen-6-yl acetate (**2l**).

Yield : 76%, 29 mg, oil. (DCM, 0.05 M. The amount of metal catalyst and ligand was doubled.)  $^1\text{H}$  NMR (400Mz,  $\text{CDCl}_3$ )  $\delta$  1.64-1.76 (m, 1H), 1.80-1.96 (m, 2H), 2.04-2.16 (m, 1H), 2.19 (s, 3H), 2.26-2.34 (m, 1H), 2.48 (t,  $J= 6.8$  Hz, 2H), 5.10 (dd,  $J= 4.8, 9.6$  Hz, 1H), 5.90 (d,  $J= 10.0$  Hz, 1H), 6.06-6.12 (m, 1H), 6.30 (d,  $J= 6.4$  Hz, 1H);  $^{13}\text{C}$  NMR (100Mz,  $\text{CDCl}_3$ )  $\delta$  21.3, 27.2, 33.3, 33.4, 42.7, 114.4, 120.8, 122.6, 127.4, 144.7, 149.5, 170.1. IR ( film ): 732, 914, 1117, 1152, 1175, 1215, 1369, 1757, 2954  $\text{cm}^{-1}$ . HRMS (ESI)  $m/z$  calcd. For  $\text{C}_{12}\text{H}_{14}\text{O}_2$  ( $\text{M}+\text{Na}$ ) $^+$  213.0886, found 213.0882.

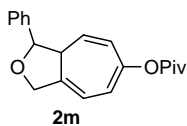

3,8a-dihydro-1-phenyl-1H-cyclohepta[c]furan-6-yl pivalate (**2m**).

Yield : 76%, 47 mg, oil. (DCM, 0.025 M).  $^1\text{H}$  NMR (400 MHz,  $\text{CD}_3\text{COCD}_3$ , one isomer):  $\delta$  1.11 (s, 9 H), 2.52-2.55 (m, 1 H), 4.47 (d,  $J= 14.4$  Hz, 1 H), 4.52 (d,  $J= 14.0$  Hz, 1 H), 4.67 (dd,  $J= 5.2, 10.0$  Hz, 1 H), 5.21 (d,  $J= 5.6$  Hz, 1 H), 5.66 (d,  $J= 10.0$  Hz, 1 H), 6.08-6.10 (m, 1 H), 6.28 (d,  $J= 6.4$  Hz, 1 H), 7.15-7.34 (m, 5H).  $^1\text{H}$  NMR (400 MHz,  $\text{CD}_3\text{COCD}_3$ , the other isomer):  $\delta$  1.11 (s, 9 H), 2.48-2.50 (m, 1 H), 4.37 (d,  $J= 14.0$  Hz, 1 H), 4.62 (d,  $J= 14.0$  Hz, 1 H), 4.94 (d,  $J= 7.6$  Hz, 1 H), 5.34 (dd,  $J= 4.0, 10.0$  Hz, 1 H), 5.84 (d,  $J= 10.0$  Hz, 1 H), 6.00-6.02 (m, 1 H), 6.14 (d,  $J= 6.8$  Hz, 1 H), 7.15-7.34 (m, 5 H).  $^{13}\text{C}$  NMR (100 MHz,  $\text{CD}_3\text{COCD}_3$ , mixture):  $\delta$  27.86, 27.88, 39.9, 48.1, 52.9, 70.9, 72.6, 83.9, 88.7, 113.6, 114.0, 121.1, 121.6, 121.8, 124.2, 125.9, 126.0,

127.3, 127.5, 128.7, 129.2, 129.7, 129.9, 139.9, 140.1, 141.9, 142.9, 151.9, 152.2, 177.7. IR (film):  $\nu$  814, 1028, 1039, 1130, 1161, 1348, 1746, 2871, 3058  $\text{cm}^{-1}$ . HRMS (ESI)  $m/z$  calcd. For  $\text{C}_{20}\text{H}_{22}\text{O}_3$  ( $\text{M}+\text{Na}$ )<sup>+</sup> 333.1461, found 333.1457.

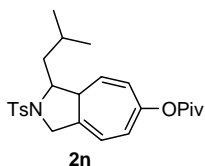

1,2,3,8a-tetrahydro-1-isobutyl-2-tosylcyclohepta[c]pyrrol-6-yl pivalate (**2n**).

Yield : 80%, 71 mg, oil. (DCM, 0.025 M). <sup>1</sup>H NMR (400 MHz,  $\text{CDCl}_3$ , one isomer):  $\delta$  0.89-1.03 (m, 6 H), 1.26 (s, 9 H), 1.61-1.77 (m, 2 H), 1.82-1.89 (m, 1 H), 2.07-2.08 (m, 1 H), 2.41 (s, 3 H), 4.09-4.12 (m, 1 H), 4.26 (d,  $J = 16.4$  Hz, 1 H), 4.29 (d,  $J = 16.4$  Hz, 1 H), 4.56 (dd,  $J = 5.2, 9.6$  Hz, 1 H), 5.68 (d,  $J = 10.0$  Hz, 1 H), 6.05-6.07 (m, 1 H), 6.30 (d,  $J = 6.4$  Hz, 1 H), 7.27-7.32 (m, 2 H), 7.70-7.73 (m, 2 H). <sup>1</sup>H NMR (400 MHz,  $\text{CDCl}_3$ , the other isomer):  $\delta$  0.89-1.03 (m, 6 H), 1.27 (s, 9 H), 1.61-1.77 (m, 2 H), 1.94-2.01 (m, 1 H), 2.12-2.15 (m, 1 H), 2.42 (s, 3 H), 3.61-3.67 (m, 1 H), 4.01 (d,  $J = 16.0$  Hz, 1 H), 4.14 (d,  $J = 15.6$  Hz, 1 H), 5.39 (dd,  $J = 5.2, 10.0$  Hz, 1 H), 5.91 (d,  $J = 10.0$  Hz, 1 H), 5.94-5.96 (m, 1 H), 6.18 (d,  $J = 6.4$  Hz, 1 H), 7.27-7.32 (m, 2 H), 7.70-7.73 (m, 2 H). <sup>13</sup>C NMR (100 MHz,  $\text{CDCl}_3$ , mixture):  $\delta$  21.5, 22.1, 22.3, 23.1, 23.3, 24.9, 25.2, 26.98, 27.0, 38.8, 39.0, 44.5, 44.6, 48.7, 51.0, 52.6, 60.7, 64.8, 114.3, 119.3, 119.4, 120.0, 122.6, 123.0, 124.7, 127.3, 127.9, 129.6, 129.7, 132.4, 133.0, 134.1, 135.9, 143.5, 143.9, 150.35, 150.44, 177.1, 177.3. IR (film):  $\nu$  731, 910, 1091, 1132, 1341, 1747, 2870, 2958  $\text{cm}^{-1}$ . HRMS (ESI)  $m/z$  calcd. For  $\text{C}_{25}\text{H}_{33}\text{NO}_4\text{S}$  ( $\text{M}+\text{Na}$ )<sup>+</sup> 466.2022, found 466.2025.

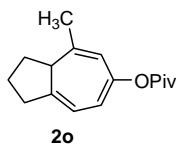

1,2,3,3a-tetrahydro-4-methylazulen-6-yl pivalate (**2o**).

Yield : 80%, 39 mg, oil. (DCM, 0.05 M. The mounts of metal catalyst and ligand were doubled.) <sup>1</sup>H NMR (400MHz,  $\text{CDCl}_3$ )  $\delta$  1.28 (s, 9 H), 1.69-1.78 (m, 1 H), 1.80-1.86 (m, 1 H), 1.87-1.97 (m, 4 H), 2.16-2.23 (m, 1 H), 2.38-2.55 (m, 3 H), 5.71 (s, 1 H), 6.06 (d,  $J = 6.4$  Hz, 1 H), 6.14 (d,  $J = 6.4$  Hz, 1 H). <sup>13</sup>C NMR (100 MHz,  $\text{CDCl}_3$ ):  $\delta$  19.8, 26.9, 27.1, 28.6, 32.9, 38.8, 45.3, 114.4, 118.7, 119.7, 135.5, 143.9, 149.0, 177.6. IR (film):  $\nu$  822, 907, 1277, 1395, 1745, 2959  $\text{cm}^{-1}$ . HRMS (ESI)  $m/z$  calcd. For  $\text{C}_{16}\text{H}_{22}\text{O}_2$  ( $\text{M}+\text{Na}$ )<sup>+</sup> 269.1512, found 269.1521.

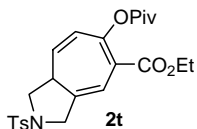

(3a*E*,5*Z*,7*Z*)-ethyl-1,2,3,8a-tetrahydro-6-(pivaloyloxy)-2-tosylcyclohepta[c]pyrrole-5-carboxylate (**2t**).

Yield : 83%, 76 mg, oil. <sup>1</sup>H NMR (400 MHz,  $\text{CDCl}_3$ )  $\delta$  1.28 (t,  $J = 7.2$  Hz, 3 H), 1.29 (s, 9 H), 2.45 (s, 3 H), 2.47 (m, 1 H), 3.36 (dd,  $J = 7.2, 10.0$  Hz, 1H), 3.68 (dd,  $J = 2.4, 10.0$

Hz, 1H), 3.80 (dd,  $J = 2.0, 14.4$  Hz, 1H), 4.05-4.12 (m, 1H), 4.16 (qd,  $J = 7.2, 10.8$  Hz, 1H), 4.27 (qd,  $J = 7.2, 10.8$  Hz, 1H), 5.50 (dd,  $J = 4.8, 9.6$  Hz, 1H), 5.87 (dd,  $J = 2.0, 9.6$  Hz, 1H), 6.47 (d,  $J = 1.6$  Hz, 1H), 7.36 (d,  $J = 8.0$  Hz, 2H), 7.74 (d,  $J = 8.0$  Hz, 2H);  $^{13}\text{C}$  NMR (100 MHz,  $\text{CDCl}_3$ )  $\delta$  14.2, 21.5, 27.0, 38.9, 41.3, 51.5, 53.2, 61.2, 114.9, 123.6, 124.2, 128.1, 129.8, 131.5, 131.6, 135.4, 144.1, 152.3, 165.5, 176.5. IR (film):  $\nu$  1092, 1134, 1161, 1227, 1275, 1348, 1720, 1749, 2341, 2360, 2872, 2978. HRMS (ESI)  $m/z$  calcd. For  $\text{C}_{24}\text{H}_{29}\text{NO}_6\text{S}$  ( $\text{M}+\text{Na}$ ) $^+$  482.1607, found 482.1590.

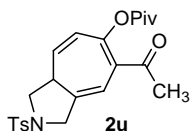

(4Z,6Z,8E)-7-acetyl-1,2,3,3a-tetrahydro-2-tosylcyclohepta[c]pyrrol-6-yl pivalate (**2u**). Yield : 83%, 71 mg, solid, mp: 115-116 °C.  $^1\text{H}$  NMR (500 MHz,  $\text{CDCl}_3$ )  $\delta$  1.30 (s, 9H), 2.32 (s, 3H), 2.45 (s, 3H), 2.48(m, 1H), 3.39 (dd,  $J = 7.0, 10.0$  Hz, 1H), 3.68 (dd,  $J = 3.0, 10.0$  Hz, 1H), 3.80 (dd,  $J = 1.5, 14.5$  Hz, 1H), 4.08 (d,  $J = 14.5$  Hz, 1H), 5.48 (dd,  $J = 5.0, 10.0$  Hz, 1H), 5.82 (dd,  $J = 1.5, 10.0$  Hz, 1H), 6.38 (d,  $J = 2.0$  Hz, 1H), 7.36 (d,  $J = 8.0$  Hz, 2H), 7.74 (d,  $J = 8.5$  Hz, 2H);  $^{13}\text{C}$  NMR (125 MHz,  $\text{CDCl}_3$ )  $\delta$  21.5, 26.9, 30.6, 39.0, 41.4, 51.6, 53.2, 114.2, 123.3, 128.1, 129.8, 130.9, 131.6, 132.0, 135.7, 144.1, 150.8, 176.6, 199.6. IR (film):  $\nu$  1090, 1161, 1267, 1348, 1692, 1747, 2873, 2976. HRMS (ESI)  $m/z$  calcd. For  $\text{C}_{23}\text{H}_{27}\text{NO}_5\text{S}$  ( $\text{M}+\text{Na}$ ) $^+$  452.1502, found 452.1513.

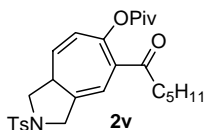

(4Z,6Z,8E)-7-hexanoyl-1,2,3,3a-tetrahydro-2-tosylcyclohepta[c]pyrrol-6-yl pivalate (**2v**). Yield : 81%, 79 mg, oil.  $^1\text{H}$  NMR (500 MHz,  $\text{CDCl}_3$ )  $\delta$  0.87 (t,  $J = 7.5$  Hz, 3H), 1.28 (s, 9H), 1.20-1.33 (m, 4H), 1.54-1.60 (m, 2H), 2.45 (s, 3H), 2.49 (m, 1H), 2.58 (qt,  $J = 7.5, 17.0$  Hz, 2H), 3.41 (dd,  $J = 7.5, 10.0$  Hz, 1H), 3.66 (dd,  $J = 2.5, 10.0$  Hz, 1H), 3.81 (dd,  $J = 1.5, 14.5$  Hz, 1H), 4.07 (d,  $J = 14.5$  Hz, 1H), 5.41 (dd,  $J = 5.0, 10.0$  Hz, 1H), 5.82 (dd,  $J = 1.5, 10.0$  Hz, 1H), 6.30 (d,  $J = 1.5$  Hz, 1H), 7.36 (d,  $J = 8.0$  Hz, 2H), 7.74 (d,  $J = 8.0$  Hz, 2H);  $^{13}\text{C}$  NMR (125 MHz,  $\text{CDCl}_3$ )  $\delta$  13.9, 21.5, 22.4, 23.7, 26.9, 31.3, 39.0, 41.4, 42.9, 51.6, 53.3, 114.1, 123.3, 128.1, 129.8, 131.6, 132.5, 135.6, 144.1, 149.4, 176.6, 202.9. IR (film):  $\nu$  1090, 1161, 1275, 1348, 1396, 1695, 1748, 2871, 2931, 2958. HRMS (ESI)  $m/z$  calcd. For  $\text{C}_{27}\text{H}_{35}\text{NO}_5\text{S}$  ( $\text{M}+\text{Na}$ ) $^+$  508.2128, found 508.2136.

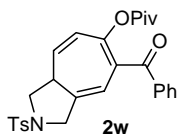

(4Z,6Z,8E)-7-benzoyl-1,2,3,3a-tetrahydro-2-tosylcyclohepta[c]pyrrol-6-yl pivalate (**2w**). Yield : 86%, 84 mg, solid, mp: 74-76 °C.  $^1\text{H}$  NMR (400 MHz,  $\text{CDCl}_3$ )  $\delta$  0.79 (s, 9H), 2.41 (s, 3H), 2.68 (m, 1H), 3.56 (dd,  $J = 7.2, 10.0$  Hz, 1H), 3.71 (dd,  $J = 3.2, 10.0$  Hz, 1H), 3.87 (dd,  $J = 2.0, 14.8$  Hz, 1H), 4.09 (td,  $J = 1.6, 14.8$  Hz, 1H), 5.41 (dd,  $J = 4.4,$



9.6 Hz, 1H), 5.89 (dd,  $J = 1.6, 9.6$  Hz, 1H), 6.38 (d,  $J = 1.6$  Hz, 1H), 7.35 (d,  $J = 8.4$  Hz, 2H), 7.38-7.42 (m, 2H), 7.51-7.55 (m, 1H), 7.73- 7.78 (m, 4H);  $^{13}\text{C}$  NMR (100 MHz,  $\text{CDCl}_3$ )  $\delta$  21.5, 26.2, 38.6, 41.8, 51.7, 53.5, 115.1, 123.4, 128.0, 128.1, 128.5, 129.2, 129.8, 130.3, 131.8, 133.5, 135.1, 136.8, 144.1, 149.0, 176.2, 195.5. IR (film):  $\nu$  1091, 1128, 1161, 1274, 1347, 1449, 1663, 1748, 2872, 2975. HRMS (ESI)  $m/z$  calcd. For  $\text{C}_{28}\text{H}_{29}\text{NO}_5\text{S}$  ( $\text{M}+\text{Na}$ ) $^+$  514.1658, found 514.1678.

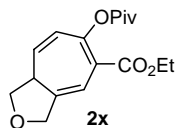

6-(2,2-Dimethyl-propionyloxy)-3,8a-dihydro-1H-cyclohepta[c]furan-5-carboxylic acid ethyl ester (**2x**).

Yield: 72%, 44 mg, oil.  $^1\text{H}$  NMR (500 MHz,  $\text{CDCl}_3$ , TMS):  $\delta$  1.31 (s, 9H), 1.32 (t,  $J = 7.5$  Hz, 3H), 2.66 (m, 1H), 4.18 (m, 3H), 4.31 (qd,  $J = 7.0, 11.0$  Hz, 1H), 4.46 (t,  $J = 1.5$  Hz, 2H), 5.50 (dd,  $J = 4.5, 10.0$  Hz, 1H), 5.89 (qd,  $J = 2.0, 10.0$  Hz, 1H), 6.51 (q,  $J = 1.5$  Hz, 1H).  $^{13}\text{C}$  NMR (100 MHz,  $\text{CDCl}_3$ ):  $\delta$  14.5, 27.3, 39.2, 42.8, 61.4, 70.8, 74.4, 112.4, 123.9, 124.8, 131.6, 140.5, 152.1, 166.2, 176.8. IR (film):  $\nu$  2976, 1750, 1721, 1479, 1395, 1366, 1256, 1226, 1163, 1131, 1103, 1035, 924, 861, 730  $\text{cm}^{-1}$ . HRMS (ESI)  $m/z$  calcd. For  $\text{C}_{17}\text{H}_{22}\text{NaO}_5$  ( $\text{M}+\text{Na}$ ) $^+$  329.1359, found 329.1368.

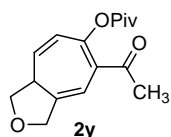

(3aE,5Z,7Z)-5-acetyl-3,8a-dihydro-1H-cyclohepta[c]furan-6-yl pivalate (**2y**).

Yield: 60%, 33 mg, oil.  $^1\text{H}$  NMR (500 MHz,  $\text{CDCl}_3$ , TMS):  $\delta$  1.31 (s, 9H), 2.38 (s, 3H), 2.66 (m, 1H), 4.15 (dd,  $J = 9.0, 3.5$  Hz, 1H), 4.23 (dd,  $J = 9.0, 6.5$  Hz, 1H), 4.45 (t,  $J = 2.0$  Hz, 2H), 5.49 (dd,  $J = 10.0, 5.0$  Hz, 1H), 5.85 (dd,  $J = 10.0, 2.0$  Hz, 1H), 6.42 (q,  $J = 2.0$  Hz, 1H).  $^{13}\text{C}$  NMR (125 MHz,  $\text{CDCl}_3$ ):  $\delta$  27.2, 30.9, 39.3, 42.9, 70.8, 74.4, 111.8, 123.7, 131.0, 132.6, 140.7, 150.6, 176.9, 200.4. IR (film):  $\nu$  2975, 1747, 1690, 1479, 1396, 1355, 1265, 1101, 1026, 909, 728  $\text{cm}^{-1}$ . For  $\text{C}_{16}\text{H}_{20}\text{NaO}_4$  ( $\text{M}+\text{Na}$ ) $^+$  299.1354, found 299.1362.

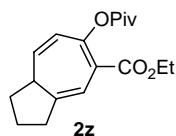

6-(2,2-Dimethyl-propionyloxy)-1,2,3,8a-tetrahydro-azulene-5-carboxylic acid ethyl ester (**2z**).

Yield: 64%, 39 mg, oil.  $^1\text{H}$  NMR (400 MHz,  $\text{CDCl}_3$ )  $\delta$  1.30 (s, 9H), 1.31 (t,  $J = 7.2$  Hz, 3H), 1.72-1.61 (m, 1H), 1.97-1.83 (m, 2H), 2.13-2.01 (m, 1H), 2.39-2.30 (m, 1H), 2.50 (t,  $J = 6.4$  Hz, 2H), 4.34-4.13 (m, 2H), 5.36 (dd,  $J = 4.8, 9.6$  Hz, 1H), 5.81 (dd,  $J = 2.0, 9.6$  Hz, 1H), 6.49 (dt,  $J = 1.6, 1.6$  Hz, 1H);  $^{13}\text{C}$  NMR (101 MHz,  $\text{CDCl}_3$ )  $\delta$  14.5, 27.0, 27.3, 33.0, 33.2, 39.1, 42.4, 61.2, 114.3, 122.8, 125.0, 133.1, 145.5, 151.2, 166.8, 176.9. IR (film):  $\nu$  1119, 1135, 1166, 1228, 1252, 1366, 1395, 1479, 1719, 1748, 2959. HRMS (ESI)  $m/z$  calcd. For  $\text{C}_{18}\text{H}_{24}\text{O}_4$  ( $\text{M}+\text{Na}$ ) $^+$  327.1567, found 327.1576.

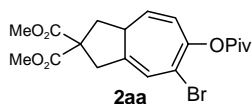

Dimethyl 7-bromo-6-(pivaloyloxy)-3,3a-dihydroazulene-2, 2(1H)-dicarboxylate  
(**2aa**).

Yield: 69%, 11 mg, oil.  $^1\text{H NMR}$  (400Mz,  $\text{CDCl}_3$ )  $\delta$  1.32 (s, 9H), 2.42-2.49 (m, 1H), 2.83-2.89 (m, 2H), 3.15 (dd,  $J=2.0, 17.2$  Hz, 1H), 3.21 (d,  $J=17.2$  Hz, 1H), 3.74 (s, 3H), 3.75 (s, 3H), 5.28 (dd,  $J=4.0, 10.0$  Hz, 1H), 5.79 (dd,  $J=1.6, 9.6$  Hz, 1H), 6.28 (td,  $J=1.6, 4.0$  Hz, 1H);  $^{13}\text{C NMR}$  (100Mz,  $\text{CDCl}_3$ )  $\delta$  27.3, 39.4, 40.1, 40.5, 41.9, 53.2, 53.3, 61.0, 116.6, 120.6, 122.7, 130.7, 142.7, 147.1, 171.4, 176.2. IR (film): 729, 907, 1028, 1079, 1109, 1139, 1206, 1263, 1436, 1480, 1734, 2257, 2362, 2957  $\text{cm}^{-1}$ . HRMS (ESI)  $m/z$  calcd. For  $\text{C}_{19}\text{H}_{23}\text{BrO}_6$  ( $\text{M}+\text{Na}$ ) $^+$  449.0570, found 449.0577.

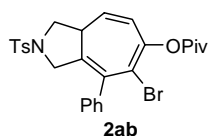

(4Z,6Z,8E)-7-bromo-1,2,3,3a-tetrahydro-8-phenyl-2-tosylcyclohepta[c]pyrrol-6-yl  
pivalate (**2ab**).

Yield : 75%, 81 mg, solid, mp: 178-180  $^{\circ}\text{C}$ .  $^1\text{H NMR}$  (500 MHz,  $\text{CDCl}_3$ ):  $\delta$  1.32 (s, 9 H), 2.46 (s, 3 H), 2.81-2.83 (m, 1 H), 3.21 (dd,  $J=6.0, 9.5$  Hz, 1 H), 3.64 (d,  $J=15$  Hz, 1 H), 3.80 (d,  $J=9.5$  Hz, 1 H), 3.82 (dd,  $J=1.0, 15$  Hz, 1 H), 5.68 (dd,  $J=5.0, 9.5$  Hz, 1 H), 5.95 (dd,  $J=1.5, 9.5$  Hz, 1 H), 7.07 (d,  $J=8.5$  Hz, 2 H), 7.32-7.38 (m, 5 H), 7.69 (d,  $J=8.5$  Hz, 2 H).  $^{13}\text{C NMR}$  (125 MHz,  $\text{CDCl}_3$ ):  $\delta$  21.6, 27.1, 39.2, 41.9, 51.3, 53.2, 77.3, 119.8, 122.4, 128.1, 128.5, 128.8, 129.8, 130.2, 131.5, 133.0, 136.2, 138.4, 144.2, 148.8, 175.8. IR (film):  $\nu$  1116, 1162, 1348, 1749, 2360, 2871, 2974  $\text{cm}^{-1}$ . HRMS (ESI)  $m/z$  calcd. For  $\text{C}_{27}\text{H}_{28}\text{BrNO}_4\text{S}$  ( $\text{M}+\text{Na}$ ) $^+$  564.0814, found 564.0825.

See procedures for the preparation of seven-membered rings via Rh-catalyzed intermolecular [5+2] cycloaddition with concomitant 1,2-acyloxy migration in the experimental section of the manuscript.

Characterization data for products derived from intermolecular reaction:

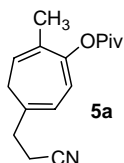

(1E,3Z,6Z)-4-(2-cyanoethyl)-7-methylcyclohepta-1,3,6-trienyl pivalate (**5a**).

Yield : 81%, 42 mg, (regioisomeric ratio > 20:1), oil. <sup>1</sup>H NMR (400 MHz, CDCl<sub>3</sub>): δ 1.31 (s, 9 H), 1.77 (s, 3 H), 2.38 (d, *J* = 7.2 Hz, 2 H), 2.50 (dt, *J* = 1.2, 6.8 Hz, 2 H), 2.59 (t, *J* = 7.2 Hz, 2 H), 5.28 (t, *J* = 7.2 Hz, 1 H), 5.95 (td, *J* = 1.2, 6.8 Hz, 1 H), 6.17 (d, *J* = 6.8 Hz, 1 H). <sup>13</sup>C NMR (100 MHz, CDCl<sub>3</sub>): δ 17.4, 17.5, 27.1, 31.5, 33.1, 38.9, 118.9, 119.1, 119.3, 120.2, 131.1, 133.5, 152.0, 176.9. IR (film): ν 912, 1057, 1277, 1479, 1741, 2250, 2972 cm<sup>-1</sup>. HRMS (ESI) *m/z* calcd. For C<sub>16</sub>H<sub>21</sub>NO<sub>2</sub> (M+Na)<sup>+</sup> 282.1464, found 282.1469.

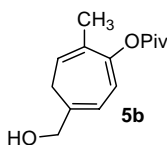

(1E,3E,6Z)-4-(hydroxymethyl)-7-methylcyclohepta-1,3,6-trienyl pivalate (**5b**).

Yield : 81%, 38 mg, (regioisomeric ratio > 20:1), oil. <sup>1</sup>H NMR (400 MHz, CDCl<sub>3</sub>): δ 1.31 (s, 9 H), 1.77 (s, 3 H), 1.86 (s, 1 H), 2.42 (d, *J* = 7.2 Hz, 2 H), 4.23 (s, 2 H), 5.28 (t, *J* = 7.2 Hz, 1 H), 6.08 (td, *J* = 1.2, 6.4 Hz, 1 H), 6.19 (d, *J* = 6.4 Hz, 1 H). <sup>13</sup>C NMR (100 MHz, CDCl<sub>3</sub>): δ 17.7, 27.1, 28.8, 38.9, 65.9, 118.1, 119.0, 120.2, 130.9, 136.9, 151.8, 177.0. IR (film): ν 800, 911, 1055, 1278, 1395, 1743, 2972, 3376 cm<sup>-1</sup>. HRMS (ESI) *m/z* calcd. For C<sub>14</sub>H<sub>20</sub>O<sub>3</sub> (M+Na)<sup>+</sup> 259.1304, found 259.1308.

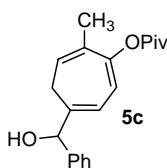

(1E,3E,6Z)-4-(hydroxy(phenyl)methyl)-7-methylcyclohepta-1,3,6-trienyl pivalate (**5c**).

Yield : 83%, 52 mg, (regioisomeric ratio > 20:1), oil. <sup>1</sup>H NMR (400 MHz, CDCl<sub>3</sub>): δ 1.30 (s, 9 H), 1.71 (s, 3 H), 2.18 (s, 1 H), 2.25 (dd, *J* = 7.2, 13.2 Hz, 1 H), 2.39 (dd, *J* = 7.2, 13.2 Hz, 1 H), 4.99 (t, *J* = 7.2 Hz, 1 H), 5.33 (s, 1 H), 6.20 (d, *J* = 6.4 Hz, 1 H), 6.24 (dd, *J* = 0.8, 6.4 Hz, 1 H), 7.25-7.37 (m, 5 H). <sup>13</sup>C NMR (100 MHz, CDCl<sub>3</sub>): δ 17.6, 27.1, 28.1, 38.9, 76.8, 118.7, 118.8, 121.4, 126.7, 127.7, 128.3, 130.6, 140.0, 142.2, 152.0, 177.0. IR (film): ν 730, 910, 1033, 1055, 1278, 1395, 1456, 1733, 2973, 3452 cm<sup>-1</sup>. HRMS (ESI) *m/z* calcd. For C<sub>20</sub>H<sub>24</sub>O<sub>3</sub> (M+Na)<sup>+</sup> 335.1617, found 335.1618.

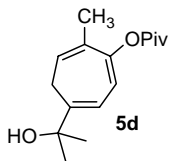

(1*E*,3*E*,6*Z*)-4-(2-hydroxypropan-2-yl)-7-methylcyclohepta-1,3,6-trienyl pivalate (**5d**).  
Yield : 87%, 46 mg, (regioisomeric ratio > 20:1), oil. <sup>1</sup>H NMR (400 MHz, CDCl<sub>3</sub>): δ 1.30 (s, 9 H), 1.39 (s, 6 H), 1.63 (s, 1 H), 1.75 (s, 3 H), 2.41 (d, *J* = 7.2 Hz, 2 H), 5.25 (t, *J* = 7.2 Hz, 1 H), 6.14 (d, *J* = 6.4 Hz, 1 H), 6.19 (d, *J* = 6.4 Hz, 1 H). <sup>13</sup>C NMR (100 MHz, CDCl<sub>3</sub>): δ 17.5, 27.2, 28.6, 29.7, 38.9, 72.7, 115.2, 119.1, 120.5, 130.5, 145.0, 151.4, 177.0. IR (film): ν 774, 912, 1051, 1278, 1479, 1743, 2973, 3397 cm<sup>-1</sup>. HRMS (ESI) *m/z* calcd. For C<sub>16</sub>H<sub>24</sub>O<sub>3</sub> (M+Na)<sup>+</sup> 287.1617, found 287.1617.

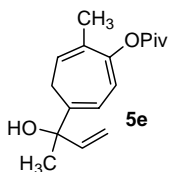

(1*E*,3*E*,6*Z*)-4-(2-hydroxybut-3-en-2-yl)-7-methylcyclohepta-1,3,6-trienyl pivalate (**5e**).

Yield : 93%, 51 mg, (regioisomeric ratio > 20:1), oil. <sup>1</sup>H NMR (400 MHz, CDCl<sub>3</sub>): δ 1.31 (s, 9 H), 1.47 (s, 3 H), 1.76 (d, *J* = 1.6 Hz, 3 H), 1.77 (s, 1 H), 2.39 (d, *J* = 7.6 Hz, 2 H), 5.13 (dd, *J* = 1.2, 10.4 Hz, 1 H), 5.22 (qt, *J* = 1.6, 7.6 Hz, 1 H), 5.30 (dd, *J* = 1.2, 17.2 Hz, 1 H), 5.96 (dd, *J* = 10.4, 17.2 Hz, 1 H), 6.18-6.21 (m, 2 H). <sup>13</sup>C NMR (100 MHz, CDCl<sub>3</sub>): δ 17.5, 27.1, 27.6, 28.5, 38.9, 75.1, 112.9, 116.7, 119.0, 121.2, 130.5, 142.3, 143.3, 151.6, 177.0. IR (film): ν 731, 839, 913, 1047, 1278, 1367, 1479, 1635, 1743, 2974, 3474 cm<sup>-1</sup>. HRMS (ESI) *m/z* calcd. For C<sub>17</sub>H<sub>24</sub>O<sub>3</sub> (M+Na)<sup>+</sup> 299.1617, found 299.1623.

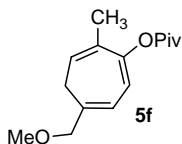

(1*E*,3*E*,6*Z*)-4-(methoxymethyl)-7-methylcyclohepta-1,3,6-trienyl pivalate (**5f**).  
Yield : 86%, 43 mg, (regioisomeric ratio = 8:1), oil. <sup>1</sup>H NMR (400 MHz, CDCl<sub>3</sub>): δ 1.30 (s, 9 H), 1.76 (s, 3 H), 2.41 (d, *J* = 7.2 Hz, 2 H), 3.31 (s, 3 H), 4.01 (s, 2 H), 5.27 (qt, *J* = 1.2, 7.2 Hz, 1 H), 6.05 (td, *J* = 1.2, 6.4 Hz, 1 H), 6.18 (d, *J* = 6.4 Hz, 1 H). <sup>13</sup>C NMR (100 MHz, CDCl<sub>3</sub>): δ 17.7, 27.1, 28.7, 38.9, 57.7, 75.2, 118.9, 120.0, 120.3, 130.8, 133.8, 152.0, 176.9. IR (film): ν 732, 910, 1056, 1276, 1479, 1745, 2819, 2926, 2974 cm<sup>-1</sup>. HRMS (ESI) *m/z* calcd. For C<sub>15</sub>H<sub>22</sub>O<sub>3</sub> (M+Na)<sup>+</sup> 273.1461, found 273.1461.

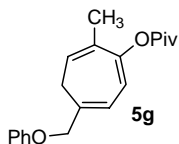

(1*E*,3*E*,6*Z*)-7-methyl-4-(phenoxyethyl)cyclohepta-1,3,6-trienyl pivalate (**5g**).

For 0.2 mmol scale, yield: 89%, 56 mg, (regioisomeric ratio = 17:1); for 3 mmol scale, yield: 81%, 758 mg, (regioisomeric ratio > 20:1). Oil.  $^1\text{H NMR}$  (400 MHz,  $\text{CDCl}_3$ ):  $\delta$  1.31 (s, 9 H), 1.78 (d,  $J = 1.2$  Hz, 3 H), 2.50 (d,  $J = 7.2$  Hz, 2 H), 4.62 (s, 2 H), 5.30 (qt,  $J = 1.2, 7.2$  Hz, 1 H), 6.18 (td,  $J = 6.4$  Hz, 1 H), 6.21 (d,  $J = 6.4$  Hz, 1 H), 6.91-6.96 (m, 3 H), 7.24-7.29 (m, 2 H).  $^{13}\text{C NMR}$  (100 MHz,  $\text{CDCl}_3$ ):  $\delta$  17.7, 27.1, 28.7, 38.9, 70.5, 114.9, 118.9, 120.1, 120.2, 120.9, 129.4, 131.0, 132.2, 152.2, 158.6, 176.9. IR (film):  $\nu$  730, 909, 1029, 1057, 1238, 1494, 1598, 1743, 2973  $\text{cm}^{-1}$ . HRMS (ESI)  $m/z$  calcd. For  $\text{C}_{20}\text{H}_{24}\text{O}_3$  ( $\text{M}+\text{Na}$ ) $^+$  335.1617, found 335.1619.

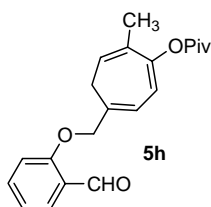

(1*E*,3*E*,6*Z*)-4-((2-formylphenoxy)methyl)-7-methylcyclohepta-1,3,6-trienyl pivalate (**5h**).

Yield : 89%, 61 mg, (regioisomeric ratio > 20:1), oil.  $^1\text{H NMR}$  (400 MHz,  $\text{CDCl}_3$ ):  $\delta$  1.32 (s, 9 H), 1.79 (d,  $J = 1.2$  Hz, 3 H), 2.52 (d,  $J = 7.2$  Hz, 2 H), 4.75 (s, 2 H), 5.33 (qt,  $J = 1.2, 7.2$  Hz, 1 H), 6.21-6.24 (m, 2 H), 6.97-7.05 (m, 2 H), 7.50-7.54 (m, 1 H), 7.84 (d,  $J = 7.6$  Hz, 1 H), 10.54 (s, 1 H).  $^{13}\text{C NMR}$  (100 MHz,  $\text{CDCl}_3$ ):  $\delta$  17.7, 27.1, 28.7, 38.9, 71.0, 112.9, 118.8, 120.1, 120.8, 121.0, 125.0, 128.4, 131.0, 131.3, 135.8, 152.6, 160.8, 176.9, 189.5. IR (film):  $\nu$  730, 757, 999, 1236, 1282, 1457, 1480, 1598, 1687, 1742, 2972  $\text{cm}^{-1}$ . HRMS (ESI)  $m/z$  calcd. For  $\text{C}_{21}\text{H}_{24}\text{O}_4$  ( $\text{M}+\text{Na}$ ) $^+$  363.1566, found 363.1569.

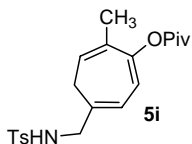

(1*E*,3*E*,6*Z*)-7-methyl-4-((tosylamino)methyl)cyclohepta-1,3,6-trienyl pivalate (**5i**).

Yield : 91%, 71 mg, (regioisomeric ratio = 10:1), oil.  $^1\text{H NMR}$  (400 MHz,  $\text{CDCl}_3$ ):  $\delta$  1.29 (s, 9 H), 1.73 (s, 3 H), 2.31 (d,  $J = 7.5$  Hz, 2 H), 2.43 (s, 3 H), 3.69 (d,  $J = 6.0$  Hz, 2 H), 4.63 (t,  $J = 6.5$  Hz, 1 H), 5.20 (qt,  $J = 1.0, 7.0$  Hz, 1 H), 5.92 (d,  $J = 6.5$  Hz, 1 H), 6.07 (d,  $J = 6.5$  Hz, 1 H), 7.30 (d,  $J = 8.5$  Hz, 2 H), 7.74 (d,  $J = 8.5$  Hz, 2 H).  $^{13}\text{C NMR}$  (125 MHz,  $\text{CDCl}_3$ ):  $\delta$  17.6, 21.5, 27.1, 29.4, 38.9, 48.5, 118.7, 120.5, 120.7, 127.1, 129.7, 131.0, 131.7, 136.8, 143.5, 152.4, 176.8. IR (film):  $\nu$  730, 911, 1049, 1093, 1157, 1279, 1324, 1479, 1742, 2973, 3280  $\text{cm}^{-1}$ . HRMS (ESI)  $m/z$  calcd. For  $\text{C}_{21}\text{H}_{27}\text{NO}_4\text{S}$  ( $\text{M}+\text{Na}$ ) $^+$  412.1553, found 412.1566.

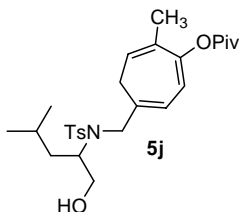

2,2-Dimethyl-propionic-acid-4-[(1-hydroxymethyl-3-methyl-butyl)-(toluene-4-sulfonyl)-amino]-methyl-7-methyl-cyclohepta-1,3,6-trienyl ester (**5j**).

Yield : 80%, 78 mg, (regioisomeric ratio > 20:1), oil.  $^1\text{H}$  NMR (400 MHz,  $\text{CDCl}_3$ ):  $\delta$  0.73-0.75 (m, 6 H), 1.14-1.38 (m, 3 H), 1.30 (s, 9 H), 1.77 (d,  $J = 1.2$  Hz, 3 H), 2.03 (s, 1 H), 2.38 (dd,  $J = 7.2, 13.2$  Hz, 1 H), 2.43 (s, 3 H), 2.51 (dd,  $J = 7.2, 13.2$  Hz, 1 H), 3.48-3.58 (m, 2 H), 3.79-3.89 (m, 1 H), 3.90 (d,  $J = 16.4$  Hz, 1H), 4.12 (d,  $J = 16.4$  Hz, 1H), 5.29 (qt,  $J = 1.2, 7.2$  Hz, 1H), 6.01 (d,  $J = 6.4$  Hz, 1 H), 6.14 (d,  $J = 6.0$  Hz, 1 H), 7.29 (d,  $J = 8.4$  Hz, 2H), 7.71 (d,  $J = 8.4$  Hz, 2H).  $^{13}\text{C}$  NMR (100 MHz,  $\text{CDCl}_3$ ):  $\delta$  17.6, 21.5, 22.3, 22.6, 24.7, 27.1, 28.7, 38.2, 38.9, 49.5, 58.4, 63.5, 118.7, 120.8, 121.0, 127.2, 129.6, 131.0, 133.2, 137.6, 143.4, 152.4, 176.8. IR (film):  $\nu$  728, 909, 1049, 1092, 1327, 1461, 1741, 2958, 3528  $\text{cm}^{-1}$ . HRMS (ESI)  $m/z$  calcd. For  $\text{C}_{27}\text{H}_{39}\text{NO}_5\text{S}$  ( $\text{M}+\text{Na}$ ) $^+$  512.2441, found 512.2453.

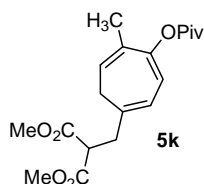

Dimethyl-2-(((1*E*,3*E*,5*Z*)-5-methyl-4-(pivaloyloxy)cyclohepta-1,3,5-trienyl)methyl)malonate (**5k**).

Yield : 85%, 60 mg, (regioisomeric ratio = 14:1), oil.  $^1\text{H}$  NMR (400 MHz,  $\text{CDCl}_3$ ):  $\delta$  1.28 (s, 9 H), 1.73 (d,  $J = 1.2$  Hz, 3 H), 2.33 (d,  $J = 7.2$  Hz, 2 H), 2.82 (d,  $J = 8.0$  Hz, 2 H), 3.58 (t,  $J = 7.6$  Hz, 1 H), 3.68 (s, 6 H), 5.21 (qt,  $J = 1.2, 7.2$  Hz, 1 H), 5.88 (td,  $J = 1.2, 6.4$  Hz, 1 H), 6.10 (d,  $J = 6.4$  Hz, 1 H).  $^{13}\text{C}$  NMR (100 MHz,  $\text{CDCl}_3$ ):  $\delta$  17.5, 27.1, 31.6, 36.6, 38.9, 51.5, 52.5, 119.2, 119.5, 120.6, 130.6, 133.0, 151.6, 169.0, 176.9. IR (film):  $\nu$  730, 912, 1056, 1228, 1276, 1435, 1736, 2955  $\text{cm}^{-1}$ . HRMS (ESI)  $m/z$  calcd. For  $\text{C}_{19}\text{H}_{26}\text{O}_6$  ( $\text{M}+\text{Na}$ ) $^+$  373.1621, found 373.1622.

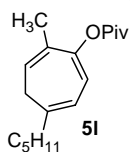

(1*E*,3*Z*,6*Z*)-7-methyl-4-pentylcyclohepta-1,3,6-trienyl pivalate (**5l**).

Yield : 81%, 45 mg, (regioisomeric ratio = 10:1), oil.  $^1\text{H}$  NMR (400 MHz,  $\text{CDCl}_3$ ):  $\delta$  0.88 (t,  $J = 7.2$  Hz, 3 H), 1.26-1.32 (m, 4 H), 1.30 (s, 9 H), 1.42-1.50 (m, 2 H), 1.76 (d,  $J = 1.2$  Hz, 3 H), 2.22 (t,  $J = 7.6$  Hz, 2 H), 2.35 (d,  $J = 7.2$  Hz, 2 H), 5.21 (qt,  $J = 1.2, 7.2$  Hz, 1H), 5.84 (d,  $J = 1.2, 6.4$  Hz, 1 H), 6.14 (d,  $J = 6.4$  Hz, 1 H).  $^{13}\text{C}$  NMR (100 MHz,  $\text{CDCl}_3$ ):  $\delta$  14.0, 17.6, 22.5, 27.2, 28.9, 31.5, 32.1, 37.8, 38.9, 118.0, 119.4, 119.6, 130.3, 139.4, 150.7, 177.1. IR (film):  $\nu$  909, 1051, 1277, 1395, 1459, 1746, 2928, 2957  $\text{cm}^{-1}$ . HRMS (ESI)  $m/z$  calcd. For  $\text{C}_{18}\text{H}_{28}\text{O}_2$  ( $\text{M}+\text{Na}$ ) $^+$  299.1981, found 299.1993.

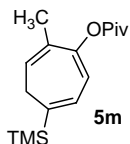

(1*E*,3*E*,6*Z*)-7-methyl-4-(trimethylsilyl)cyclohepta-1,3,6-trienyl pivalate (**5m**).

Yield : 53%, 29 mg, (regioisomeric ratio = 10:1), oil.  $^1\text{H}$  NMR (400 MHz,  $\text{CDCl}_3$ ):  $\delta$  0.01 (s, 9 H), 1.19 (s, 9 H), 1.65 (s, 3 H), 2.21 (d,  $J = 7.2$  Hz, 2 H), 5.10 (qt,  $J = 1.2, 7.2$  Hz, 1 H), 6.18 (d,  $J = 6.0$  Hz, 1 H), 6.20 (d,  $J = 6.0$  Hz, 1 H).  $^{13}\text{C}$  NMR (100 MHz,

CDCl<sub>3</sub>):  $\delta$  -1.6, 17.7, 27.2, 30.2, 39.0, 120.0, 120.8, 130.2, 130.4, 139.4, 152.7, 177.0. IR (film):  $\nu$  751, 830, 1065, 1247, 1395, 1479, 1538, 1747, 2956 cm<sup>-1</sup>. HRMS (ESI)  $m/z$  calcd. For C<sub>16</sub>H<sub>26</sub>O<sub>2</sub>Si (M+Na)<sup>+</sup> 301.1594, found 301.1601.

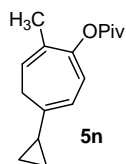

(1E,3E,6Z)-4-cyclopropyl-7-methylcyclohepta-1,3,6-trienyl pivalate (**5n**).

Yield : 64%, 31 mg, oil. <sup>1</sup>H NMR (400 MHz, CDCl<sub>3</sub>):  $\delta$  0.55-0.59 (m, 2 H), 0.75-0.80 (m, 2 H), 1.30 (s, 9 H), 1.56-1.63 (m, 1 H), 1.75 (d,  $J$  = 1.2 Hz, 3 H), 2.12 (d,  $J$  = 7.2 Hz, 2 H), 5.11 (qt,  $J$  = 1.2, 7.2 Hz, 1 H), 5.94 (d,  $J$  = 6.4 Hz, 1 H), 6.14 (d,  $J$  = 6.4 Hz, 1 H). <sup>13</sup>C NMR (100 MHz, CDCl<sub>3</sub>):  $\delta$  7.3, 16.8, 17.5, 27.2, 28.2, 38.9, 116.9, 118.6, 119.4, 130.6, 140.2, 150.5, 177.1. IR (film):  $\nu$  733, 911, 1037, 1278, 1395, 1479, 1745, 2359, 2973 cm<sup>-1</sup>. HRMS (ESI)  $m/z$  calcd. For C<sub>16</sub>H<sub>22</sub>O<sub>2</sub> (M+Na)<sup>+</sup> 269.1512, found 269.1513.

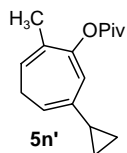

(1E,3Z,6Z)-3-cyclopropyl-7-methylcyclohepta-1,3,6-trienyl pivalate (**5n'**).

Yield : 13%, 6 mg, oil. <sup>1</sup>H NMR (400 MHz, CDCl<sub>3</sub>):  $\delta$  0.45-0.49 (m, 2 H), 0.65-0.69 (m, 2 H), 1.31 (s, 9 H), 1.47-1.53 (m, 1 H), 1.76 (s, 3 H), 2.25 (dd,  $J$  = 7.2, 7.2 Hz, 2 H), 5.24 (t,  $J$  = 7.2 Hz, 1 H), 5.36 (qt,  $J$  = 1.2, 7.2 Hz, 1 H), 6.10 (s, 1 H). <sup>13</sup>C NMR (100 MHz, CDCl<sub>3</sub>):  $\delta$  6.1, 15.5, 17.7, 26.8, 27.2, 38.9, 116.7, 120.4, 121.6, 130.0, 137.5, 151.9, 177.0. IR (film):  $\nu$  906, 1101, 1276, 1396, 1479, 1638, 1746, 2972 cm<sup>-1</sup>. HRMS (ESI)  $m/z$  calcd. For C<sub>16</sub>H<sub>22</sub>O<sub>2</sub> (M+Na)<sup>+</sup> 269.1512, found 269.1514.

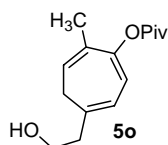

(1E,3E,6Z)-4-(2-hydroxyethyl)-7-methylcyclohepta-1,3,6-trienyl pivalate (**5o**).

Yield : 80%, 40 mg, (regioisomeric ratio = 10:1), oil. <sup>1</sup>H NMR (400 MHz, CDCl<sub>3</sub>):  $\delta$  1.31 (s, 9 H), 1.47 (s, 1 H), 1.77 (s, 3 H), 2.37 (d,  $J$  = 7.2 Hz, 2 H), 2.51 (t,  $J$  = 6.0 Hz, 2 H), 3.70 (m, 2 H), 5.26 (t,  $J$  = 7.2 Hz, 1 H), 5.95 (d,  $J$  = 6.0 Hz, 1 H), 6.18 (d,  $J$  = 6.4 Hz, 1 H). <sup>13</sup>C NMR (100 MHz, CDCl<sub>3</sub>):  $\delta$  17.6, 27.1, 31.9, 38.9, 41.0, 61.4, 119.2, 119.5, 120.7, 130.9, 134.2, 151.5, 177.1. IR (film):  $\nu$  731, 911, 1057, 1278, 1479, 1635, 1744, 2874, 2958, 3357 cm<sup>-1</sup>. HRMS (ESI)  $m/z$  calcd. For C<sub>15</sub>H<sub>22</sub>O<sub>3</sub> (M+Na)<sup>+</sup> 273.1461, found 273.1462.

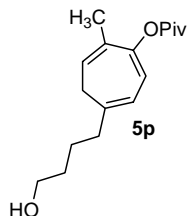

(1*E*,3*Z*,6*Z*)-4-(4-hydroxybutyl)-7-methylcyclohepta-1,3,6-trienyl pivalate (**5p**).

Yield : 68%, 38 mg, (regioisomeric ratio = 8:1), oil. <sup>1</sup>H NMR (400 MHz, CDCl<sub>3</sub>): δ 1.30 (s, 9 H), 1.49-1.58 (m, 5 H), 1.76 (s, 3 H), 2.26 (t, *J* = 6.0 Hz, 2 H), 2.36 (d, *J* = 7.2 Hz, 2 H), 3.62-3.65 (m, 2 H), 5.21 (qt, *J* = 1.2, 7.2 Hz, 1 H), 5.85 (d, *J* = 6.4 Hz, 1 H), 6.14 (d, *J* = 6.0 Hz, 1 H). <sup>13</sup>C NMR (100 MHz, CDCl<sub>3</sub>): δ 17.6, 25.3, 27.2, 32.0, 32.3, 37.5, 38.9, 62.7, 118.3, 119.4, 119.5, 130.4, 138.7, 150.9, 177.1. IR (film): ν 730, 910, 1062, 1278, 1479, 1743, 2871, 2933, 3353 cm<sup>-1</sup>. HRMS (ESI) *m/z* calcd. For C<sub>17</sub>H<sub>26</sub>O<sub>3</sub> (M+Na)<sup>+</sup> 301.1774, found 301.1774.

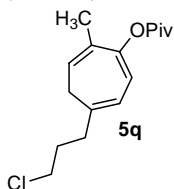

(1*E*,3*Z*,6*Z*)-4-(3-chloropropyl)-7-methylcyclohepta-1,3,6-trienyl pivalate (**5q**).

Yield : 77%, 43 mg, (regioisomeric ratio = 8:1), oil. <sup>1</sup>H NMR (400 MHz, CDCl<sub>3</sub>): δ 1.31 (s, 9 H), 1.77 (d, *J* = 1.2 Hz, 3 H), 1.91-1.97 (m, 2 H), 2.35-2.42 (m, 4 H), 3.51 (t, *J* = 6.4 Hz, 2 H), 5.22 (qt, *J* = 1.2, 7.2 Hz, 1 H), 5.89 (td, *J* = 1.2, 6.4 Hz, 1 H), 6.15 (d, *J* = 6.4 Hz, 1 H). <sup>13</sup>C NMR (100 MHz, CDCl<sub>3</sub>): δ 17.6, 27.2, 31.85, 31.91, 34.7, 38.9, 44.2, 119.2, 119.3, 119.5, 130.7, 136.7, 151.2, 177.1. IR (film): ν 732, 911, 1058, 1277, 1395, 1479, 1743, 2958 cm<sup>-1</sup>. HRMS (ESI) *m/z* calcd. For C<sub>16</sub>H<sub>23</sub>ClO<sub>2</sub> (M+Na)<sup>+</sup> 305.1278, found 305.1279.

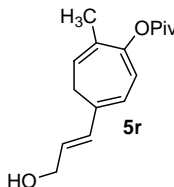

(1*E*,3*E*,6*Z*)-4-((*E*)-3-hydroxyprop-1-enyl)-7-methylcyclohepta-1,3,6-trienyl pivalate (**5r**).

Yield : 74%, 39 mg, (regioisomeric ratio = 8:1), oil. <sup>1</sup>H NMR (400 MHz, CDCl<sub>3</sub>): δ 1.31 (s, 9 H), 1.64 (s, 1 H), 1.77 (d, *J* = 1.2 Hz, 3 H), 2.64 (d, *J* = 7.2 Hz, 2 H), 4.25 (d, *J* = 6.0 Hz, 2 H), 5.30 (qt, *J* = 1.2, 7.2 Hz, 1 H), 6.06 (d, *J* = 6.8 Hz, 1 H), 6.11 (td, *J* = 6.0, 15.6 Hz, 1 H), 6.23 (d, *J* = 6.4 Hz, 1 H), 6.34 (d, *J* = 15.6 Hz, 1 H). <sup>13</sup>C NMR (100 MHz, CDCl<sub>3</sub>): δ 17.6, 27.1, 27.5, 38.9, 63.5, 119.8, 121.0, 123.1, 129.3, 131.4, 132.0, 132.2, 152.2, 177.0. IR (film): ν 729, 909, 1054, 1277, 1395, 1479, 1739, 2974, 3415 cm<sup>-1</sup>. HRMS (ESI) *m/z* calcd. For C<sub>16</sub>H<sub>22</sub>O<sub>3</sub> (M+Na)<sup>+</sup> 285.1461, found 285.1447.

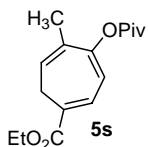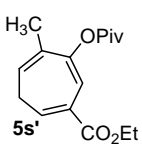

(1*E*,3*E*,5*Z*)-ethyl 5-methyl-4-(pivaloyloxy)cyclohepta-1,3,5-trienecarboxylate (**5s**).

(1*E*,4*Z*,6*E*)-ethyl 5-methyl-6-(pivaloyloxy)cyclohepta-1,4,6-trienecarboxylate (**5s'**).

Yield : 82%, 46 mg, (regioisomeric ratio = 1.4:1), oil. <sup>1</sup>H NMR (**5s**, 400 MHz, CDCl<sub>3</sub>): δ 1.28-1.32 (m, 12 H), 1.78 (d, *J* = 1.2 Hz, 3 H), 2.68 (d, *J* = 7.2 Hz, 2 H), 4.19-4.25 (m, 2 H), 5.44 (qt, *J* = 1.2, 7.2 Hz, 1 H), 6.30 (d, *J* = 6.8 Hz, 1 H), 7.16 (d, *J* = 6.4 Hz, 1 H).



$^1\text{H}$  NMR (**5s'**, 400 MHz,  $\text{CDCl}_3$ ):  $\delta$  1.28-1.32 (m, 12 H), 1.76 (d,  $J = 1.2$  Hz, 3 H), 2.42 (dd,  $J = 7.2, 7.2$  Hz, 2 H), 4.19-4.25 (m, 2 H), 5.29 (qt,  $J = 1.2, 7.2$  Hz, 1 H), 6.57 (t,  $J = 7.2$  Hz, 1 H), 6.78 (s, 1 H).  $^{13}\text{C}$  NMR (100 MHz,  $\text{CDCl}_3$ ):  $\delta$  14.2, 17.6, 17.7, 26.4, 27.09, 27.12, 27.3, 38.9, 39.0, 60.8, 117.3, 118.7, 119.2, 122.8, 123.6, 128.6, 130.4, 131.1, 131.4, 131.8, 152.9, 155.9, 165.8, 166.2, 176.5, 176.8. IR (film):  $\nu$  732, 762, 910, 1056, 1094, 1173, 1222, 1253, 1367, 1479, 1706, 1748, 2976  $\text{cm}^{-1}$ . HRMS (ESI)  $m/z$  calcd. For  $\text{C}_{16}\text{H}_{22}\text{O}_4$  ( $\text{M}+\text{Na}$ ) $^+$  301.1410, found 301.1425.

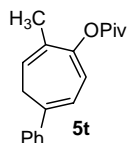

(1*E*,3*E*,6*Z*)-7-methyl-4-phenylcyclohepta-1,3,6-trienyl pivalate (**5t**).

Yield : 58%, 33 mg, oil.  $^1\text{H}$  NMR (400 MHz,  $\text{CDCl}_3$ ):  $\delta$  1.33 (s, 9 H), 1.81 (d,  $J = 1.2$  Hz, 3 H), 2.84 (d,  $J = 7.2$  Hz, 2 H), 5.35 (qt,  $J = 1.2, 7.2$  Hz, 1 H), 6.36 (d,  $J = 6.8$  Hz, 1 H), 6.41 (d,  $J = 6.8$  Hz, 1 H), 7.23-7.27 (m, 1 H), 7.31-7.36 (m, 2 H), 7.47-7.50 (m, 2 H).  $^{13}\text{C}$  NMR (100 MHz,  $\text{CDCl}_3$ ):  $\delta$  17.6, 27.2, 31.2, 39.0, 119.7, 120.1, 127.2, 127.3, 128.4, 131.1, 134.2, 140.5, 151.9, 177.0. IR (film):  $\nu$  758, 910, 1060, 1276, 1446, 1478, 1743, 2973  $\text{cm}^{-1}$ . HRMS (ESI)  $m/z$  calcd. For  $\text{C}_{19}\text{H}_{22}\text{O}_2$  ( $\text{M}+\text{Na}$ ) $^+$  305.1512, found 305.1516.

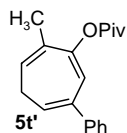

(1*E*,3*E*,6*Z*)-7-methyl-3-phenylcyclohepta-1,3,6-trienyl pivalate (**5t'**).

Yield : 17%, 10 mg, oil.  $^1\text{H}$  NMR (400 MHz,  $\text{CDCl}_3$ ):  $\delta$  1.34 (s, 9 H), 1.82 (d,  $J = 1.2$  Hz, 3 H), 2.45 (dd,  $J = 7.2, 7.2$  Hz, 2 H), 5.43 (qt,  $J = 1.6, 7.2$  Hz, 1 H), 5.73 (t,  $J = 7.2$  Hz, 1 H), 6.51 (s, 1 H), 7.24-7.28 (m, 1 H), 7.30-7.35 (m, 2 H), 7.37-7.40 (m, 2 H).  $^{13}\text{C}$  NMR (100 MHz,  $\text{CDCl}_3$ ):  $\delta$  17.7, 27.2, 27.5, 39.0, 118.7, 120.8, 121.4, 127.1, 127.4, 128.3, 130.4, 136.8, 140.4, 152.9, 176.9. IR (film):  $\nu$  764, 906, 1100, 1276, 1446, 1746, 2973  $\text{cm}^{-1}$ . HRMS (ESI)  $m/z$  calcd. For  $\text{C}_{19}\text{H}_{22}\text{O}_2$  ( $\text{M}+\text{Na}$ ) $^+$  305.1512, found 305.1516.

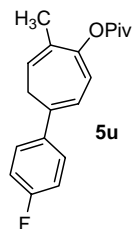

(1*E*,3*E*,6*Z*)-4-(4-fluorophenyl)-7-methylcyclohepta-1,3,6-trienyl pivalate (**5u**).

Yield : 83%, 50 mg, (regioisomeric ratio = 6:1), oil.  $^1\text{H}$  NMR (400 MHz,  $\text{CDCl}_3$ ):  $\delta$  1.33 (s, 9 H), 1.81 (d,  $J = 1.2$  Hz, 3 H), 2.80 (d,  $J = 7.6$  Hz, 2 H), 5.34 (qt,  $J = 1.2, 7.6$  Hz, 1 H), 6.33 (d,  $J = 6.8$  Hz, 1 H), 6.35 (d,  $J = 6.8$  Hz, 1 H), 6.99-7.04 (m, 2 H), 7.43-7.46 (m, 2 H).  $^{13}\text{C}$  NMR (100 MHz,  $\text{CDCl}_3$ ):  $\delta$  17.6, 27.2, 31.3, 39.0, 115.3 (d,  $J = 21.3$  Hz), 119.5, 119.6, 120.1, 128.8 (d,  $J = 7.7$  Hz), 131.2, 133.0, 136.6, 151.9, 162.1 (d,  $J = 246$  Hz), 177.0. IR (film):  $\nu$  651, 728, 907, 1130, 1510, 1602, 1741, 2978  $\text{cm}^{-1}$ . HRMS (ESI)  $m/z$  calcd. For  $\text{C}_{19}\text{H}_{21}\text{FO}_2$  ( $\text{M}+\text{Na}$ ) $^+$  323.1417, found 323.1421.

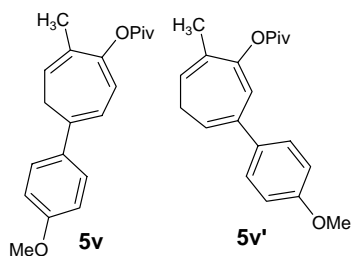

(1*E*,3*E*,6*Z*)-4-(4-methoxyphenyl)-7-methylcyclohepta-1,3,6-trienyl pivalate (**5v**).

(1*E*,3*E*,6*Z*)-3-(4-methoxyphenyl)-7-methylcyclohepta-1,3,6-trienyl pivalate (**5v'**).

Yield : 76%, 47 mg, (regioisomeric ratio = 3.6:1), oil.  $^1\text{H NMR}$  (**5v**, 400 MHz,  $\text{CDCl}_3$ ):  $\delta$  1.34 (s, 9 H), 1.81 (s, 3 H), 2.82 (d,  $J = 7.2$  Hz, 2 H), 3.82 (s, 3 H), 5.31 (qt,  $J = 1.2, 7.6$  Hz, 1 H), 6.33 (d,  $J = 6.8$  Hz, 1 H), 6.36 (d,  $J = 6.8$  Hz, 1 H), 6.86-6.89 (m, 2 H), 7.43-7.47 (m, 2 H).  $^1\text{H NMR}$  (**5v'**, 400 MHz,  $\text{CDCl}_3$ ):  $\delta$  1.35 (s, 9 H), 1.83 (s, 3 H), 2.43 (dd,  $J = 7.2$  Hz, 2 H), 3.81 (s, 3 H), 5.43 (t,  $J = 7.2$  Hz, 1 H), 5.64 (t,  $J = 7.2$  Hz, 1 H), 6.49 (s, 1 H), 6.86-6.89 (m, 2 H), 7.31-7.33 (m, 2 H).  $^{13}\text{C NMR}$  (100 MHz,  $\text{CDCl}_3$ ):  $\delta$  17.6, 27.2, 31.2, 38.9, 55.3, 113.6, 113.80, 113.84, 118.2, 119.3, 120.2, 126.2, 128.4, 128.6, 131.0, 132.9, 133.4, 151.4, 159.0, 177.1. IR (film):  $\nu$  824, 1034, 1178, 1247, 1278, 1460, 1509, 1605, 1743, 2971  $\text{cm}^{-1}$ . HRMS (ESI)  $m/z$  calcd. For  $\text{C}_{20}\text{H}_{24}\text{O}_3$  ( $\text{M}+\text{Na}$ ) $^+$  335.1617, found 335.1622.

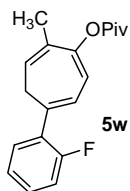

(1*E*,3*E*,6*Z*)-4-(2-fluorophenyl)-7-methylcyclohepta-1,3,6-trienyl pivalate (**5w**).

Yield : 80%, 48 mg, (regioisomeric ratio = 11:1), oil.  $^1\text{H NMR}$  (400 MHz,  $\text{CDCl}_3$ ):  $\delta$  1.33 (s, 9 H), 1.83 (d,  $J = 1.2$  Hz, 3 H), 2.76 (d,  $J = 7.6$  Hz, 2 H), 5.44 (qt,  $J = 1.2, 7.2$  Hz, 1 H), 6.32-6.35 (m, 2 H), 7.02-7.11 (m, 2 H), 7.20-7.26 (m, 1 H), 7.34 (dt,  $J = 1.6, 7.6$  Hz, 1 H).  $^{13}\text{C NMR}$  (100 MHz,  $\text{CDCl}_3$ ):  $\delta$  17.6, 27.2, 32.3 (d,  $J = 3.8$  Hz), 39.0, 115.8 (d,  $J = 22.9$  Hz), 119.6, 120.7, 122.9 (d,  $J = 3.1$  Hz), 124.0 (d,  $J = 3.0$  Hz), 128.8 (d,  $J = 7.7$  Hz), 129.5 (d,  $J = 13.0$  Hz), 130.0 (d,  $J = 2.3$  Hz), 130.5 (d,  $J = 3.8$  Hz), 130.9, 152.4, 159.9 (d,  $J = 247$  Hz), 177.0. IR (film):  $\nu$  754, 1060, 1275, 1450, 1484, 1744, 2973  $\text{cm}^{-1}$ . HRMS (ESI)  $m/z$  calcd. For  $\text{C}_{19}\text{H}_{21}\text{FO}_2$  ( $\text{M}+\text{Na}$ ) $^+$  323.1417, found 323.1418.

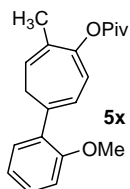

(1*E*,3*E*,6*Z*)-4-(2-methoxyphenyl)-7-methylcyclohepta-1,3,6-trienyl pivalate (**5x**).

Yield : 60%, 37 mg, (regioisomeric ratio = 5:1), oil.  $^1\text{H NMR}$  (400 MHz,  $\text{CDCl}_3$ ):  $\delta$  1.33 (s, 9 H), 1.82 (s, 3 H), 2.74 (d,  $J = 7.2$  Hz, 2 H), 3.84 (s, 3 H), 5.38 (t,  $J = 7.2$  Hz, 1 H), 6.22 (d,  $J = 6.4$  Hz, 1 H), 6.30 (d,  $J = 6.4$  Hz, 1 H), 6.87-6.93 (m, 2 H), 7.22-7.27 (m,

2 H).  $^{13}\text{C}$  NMR (100 MHz,  $\text{CDCl}_3$ ):  $\delta$  17.7, 27.2, 32.7, 38.9, 55.4, 110.7, 119.6, 120.4, 121.5, 121.8, 128.7, 130.4, 131.3, 134.6, 151.8, 156.5, 177.0. IR (film):  $\nu$  730, 909, 1027, 1248, 1280, 1491, 1745, 2972  $\text{cm}^{-1}$ . HRMS (ESI)  $m/z$  calcd. For  $\text{C}_{20}\text{H}_{24}\text{O}_3$  ( $\text{M}+\text{Na}$ ) $^+$  335.1617, found 335.1634.

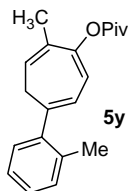

(1*E*,3*E*,6*Z*)-7-methyl-4-*o*-tolylcyclohepta-1,3,6-trienyl pivalate (**5y**).

Yield : 32%, 19 mg, oil.  $^1\text{H}$  NMR (400 MHz,  $\text{CDCl}_3$ ):  $\delta$  1.34 (s, 9 H), 1.83 (d,  $J = 1.2$  Hz, 3 H), 2.31 (s, 3 H), 2.69 (d,  $J = 7.2$  Hz, 2 H), 5.32 (qt,  $J = 1.2, 7.2$  Hz, 1 H), 6.04 (d,  $J = 6.4$  Hz, 1 H), 6.32 (d,  $J = 6.4$  Hz, 1 H), 7.12-7.15 (m, 2 H), 7.18-7.19 (m, 2 H).  $^{13}\text{C}$  NMR (100 MHz,  $\text{CDCl}_3$ ):  $\delta$  17.7, 20.7, 27.2, 33.7, 39.0, 119.6, 119.8, 122.0, 125.5, 127.2, 129.5, 130.1, 130.9, 135.4, 136.4, 142.5, 151.6, 177.1. IR (film):  $\nu$  731, 910, 1057, 1276, 1457, 1480, 1745, 2972  $\text{cm}^{-1}$ . HRMS (ESI)  $m/z$  calcd. For  $\text{C}_{20}\text{H}_{24}\text{O}_2$  ( $\text{M}+\text{Na}$ ) $^+$  319.1668, found 319.1671.

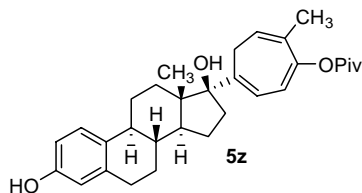

(1*E*,3*E*,6*Z*)-4-((8*R*,9*S*,13*S*,14*S*,17*R*)-7,8,9,11,12,13,14,15,16,17-decahydro-3,17-dihydroxy-13-methyl-6H-cyclopenta[*a*]phenanthren-17-yl)-7-methylcyclohepta-1,3,6-trienyl pivalate (**5z**).

Yield : 86%, 82 mg, (regioisomeric ratio > 20:1), solid, mp: 142-143  $^{\circ}\text{C}$ .  $^1\text{H}$  NMR (400 MHz,  $\text{CDCl}_3$ ):  $\delta$  0.98 (s, 3 H), 1.11-1.19 (m, 1 H), 1.24-1.56 (m, 5 H), 1.32 (s, 9 H), 1.67-2.21 (m, 9 H), 1.78 (s, 3 H), 2.74-2.82 (m, 2 H), 2.99 (s, 1 H), 5.30 (t,  $J = 6.8$  Hz, 1 H), 5.53 (s, 1 H), 5.90 (d,  $J = 2.4$  Hz, 1 H), 6.27 (d,  $J = 6.4$  Hz, 1 H), 6.50 (d,  $J = 2.4$  Hz, 1 H), 6.59 (dd,  $J = 2.8, 8.4$  Hz, 1 H), 7.06 (d,  $J = 8.4$  Hz, 1 H).  $^{13}\text{C}$  NMR (100 MHz,  $\text{CDCl}_3$ ):  $\delta$  14.5, 17.5, 23.5, 26.4, 27.1, 27.4, 29.5, 30.6, 33.9, 38.7, 39.0, 39.4, 43.3, 47.4, 48.3, 86.3, 112.7, 115.1, 119.3, 120.1, 121.3, 126.3, 130.3, 132.3, 137.8, 144.2, 151.6, 153.5, 177.6. IR (film):  $\nu$  785, 909, 1052, 1283, 1378, 1450, 1500, 1611, 1726, 2360, 2872, 2930, 3441  $\text{cm}^{-1}$ . HRMS (ESI)  $m/z$  calcd. For  $\text{C}_{31}\text{H}_{40}\text{O}_4$  ( $\text{M}+\text{Na}$ ) $^+$  499.2818, found 499.2834.

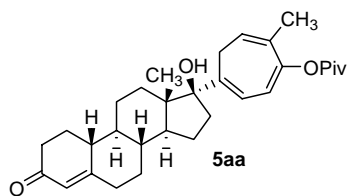

(1*E*,3*E*,6*Z*)-4-((8*R*,9*S*,10*R*,13*S*,14*S*,17*R*)-2,3,6,7,8,9,10,11,12,13,14,15,16,17-tetradecahydro-17-hydroxy-13-methyl-3-oxo-1*H*-cyclopenta[*a*]phenanthren-17-yl)-7-methylcyclohepta-1,3,6-trienyl pivalate (**5aa**).

Yield : 92%, 88 mg, (regioisomeric ratio > 20:1), oil. <sup>1</sup>H NMR (400 MHz, CDCl<sub>3</sub>): δ 0.71-0.79 (m, 1 H), 1.01-1.11 (m, 2 H), 1.03 (s, 3 H), 1.20-1.33 (m, 1 H), 1.31 (s, 9 H), 1.35-1.55 (m, 4 H), 1.64-1.98 (m, 7 H), 1.76 (s, 3 H), 2.02-2.09 (m, 2 H), 2.18-2.31 (m, 3 H), 2.35-2.49 (m, 2 H), 2.96 (s, 1 H), 5.27 (t, *J* = 6.8 Hz, 1 H), 5.81 (s, 1 H), 5.85 (d, *J* = 6.4 Hz, 1 H), 6.22 (d, *J* = 6.8 Hz, 1 H). <sup>13</sup>C NMR (100 MHz, CDCl<sub>3</sub>): δ 14.5, 17.5, 23.6, 26.3, 26.5, 27.1, 30.5, 30.7, 33.6, 35.4, 36.4, 38.5, 38.9, 41.1, 42.4, 47.1, 48.0, 49.0, 86.0, 119.1, 120.2, 121.2, 124.5, 130.4, 144.1, 151.7, 166.5, 177.1, 199.9. IR (film): ν 729, 911, 1007, 1027, 1053, 1208, 1261, 1332, 1395, 1452, 1478, 1661, 1742, 2869, 2930, 3454 cm<sup>-1</sup>. HRMS (ESI) *m/z* calcd. For C<sub>31</sub>H<sub>42</sub>O<sub>4</sub> (M+Na)<sup>+</sup> 501.2975, found 501.2990.

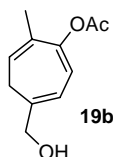

(1*E*,3*E*,6*Z*)-4-(hydroxymethyl)-7-methylcyclohepta-1,3,6-trienyl acetate (**19b**).

Yield : 71%, 28 mg, (regioisomeric ratio > 20:1), oil. <sup>1</sup>H NMR (500 MHz, CDCl<sub>3</sub>) δ 1.58 (s, 1 H), 1.79 (s, 3 H), 2.21 (s, 3 H), 2.43 (d, *J* = 7.50 Hz, 2 H), 4.25 (s, 2 H), 5.29 (qt, *J* = 1.00, 7.50 Hz, 1 H), 6.09 (td, *J* = 1.50, 7.50 Hz, 1 H), 6.24 (d, *J* = 6.50 Hz, 1 H). <sup>13</sup>C NMR (125 MHz, CDCl<sub>3</sub>) δ 17.7, 20.8, 28.9, 66.0, 118.2, 119.3, 120.3, 130.8, 137.0, 151.6, 169.3. IR (film) ν: 697, 804, 829, 884, 924, 1010, 1058, 1122, 1216, 1370, 1436, 1637, 1683, 1746, 2926, 3422. HRMS (ESI) *m/z* calcd. For C<sub>11</sub>H<sub>14</sub>O<sub>3</sub> (M+Na)<sup>+</sup> 217.0835, found 217.0837.

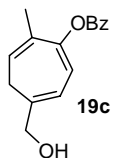

(1*E*,3*E*,6*Z*)-4-(hydroxymethyl)-7-methylcyclohepta-1,3,6-trienyl benzoate (**19c**).

Yield : 58%, 30 mg, (regioisomeric ratio > 20:1), oil. <sup>1</sup>H NMR (400 MHz, CDCl<sub>3</sub>): δ 1.74 (s, 1 H), 1.82 (d, *J* = 1.2 Hz, 3 H), 2.51 (d, *J* = 7.2 Hz, 2 H), 4.28 (s, 2 H), 5.34 (qt, *J* = 1.2, 7.2 Hz, 1 H), 6.15 (td, *J* = 1.2, 6.4 Hz, 1 H), 6.39 (d, *J* = 6.4 Hz, 1 H), 7.47-7.52 (m, 2 H), 7.60-7.64 (m, 1 H), 8.14-8.17 (m, 2 H). <sup>13</sup>C NMR (100 MHz, CDCl<sub>3</sub>): δ 17.8, 28.9, 66.0, 118.2, 119.5, 120.5, 128.5, 129.5, 130.0, 130.9, 133.4, 137.2, 151.8, 165.1. IR (film): ν 707, 908, 1023, 1133, 1456, 1724, 2923, 3319 cm<sup>-1</sup>. HRMS (ESI) *m/z* calcd. For C<sub>16</sub>H<sub>16</sub>O<sub>3</sub> (M+Na)<sup>+</sup> 279.0991, found 279.0998.

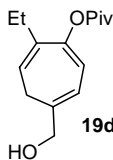

(1*E*,3*E*,6*Z*)-7-ethyl-4-(hydroxymethyl)cyclohepta-1,3,6-trienyl pivalate (**19d**).

Yield : 87%, 44 mg, (regioisomeric ratio > 20:1), oil. <sup>1</sup>H NMR (400 MHz, CDCl<sub>3</sub>): δ 0.98 (t, *J* = 7.2 Hz, 3 H), 1.31 (s, 9 H), 1.85 (broad, 1 H), 2.10 (q, *J* = 7.2 Hz, 2 H), 2.43

(d,  $J = 7.2$  Hz, 2 H), 4.24 (s, 2 H), 5.28 (t,  $J = 7.2$  Hz, 1 H), 6.06 (td,  $J = 1.2, 6.4$  Hz, 1 H), 6.22 (d,  $J = 6.4$  Hz, 1 H).  $^{13}\text{C}$  NMR (100 MHz,  $\text{CDCl}_3$ ):  $\delta$  13.5, 25.0, 27.4, 29.0, 39.2, 66.1, 118.3, 119.3, 119.9, 136.9, 137.8, 151.7, 177.4. IR (film):  $\nu$  3361, 2967, 1745, 1278, 1125, 912  $\text{cm}^{-1}$ . HRMS (ESI)  $m/z$  calcd. For  $\text{C}_{15}\text{H}_{22}\text{O}_3$  ( $\text{M}+\text{Na}$ ) $^+$  273.1461, found 273.1473.

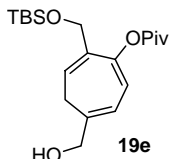

(1*E*,3*E*,6*Z*)-7-((tert-butyldimethylsilyloxy)methyl)-4-(hydroxymethyl)cyclohepta-1,3,6-trienyl pivalate (**19e**).

Yield : 92%, 67 mg, (regioisomeric ratio > 20:1), oil.  $^1\text{H}$  NMR (400 MHz,  $\text{CDCl}_3$ ):  $\delta$  0.02 (s, 6 H), 0.87 (s, 9 H), 1.30 (s, 9 H), 1.66-1.64 (m, 1 H), 2.49 (d,  $J = 7.6$  Hz, 2 H), 4.20 (s, 2 H), 4.24 (d,  $J = 5.2$  Hz, 2 H), 5.53 (t,  $J = 7.2$  Hz, 1 H), 6.07 (d,  $J = 6.4$  Hz, 1 H), 6.22 (d,  $J = 6.4$  Hz, 1 H).  $^{13}\text{C}$  NMR (125 MHz,  $\text{CDCl}_3$ ):  $\delta$  -5.3, 18.3, 25.8, 27.1, 28.5, 39.0, 62.0, 66.0, 118.3, 119.3, 120.1, 134.7, 137.0, 150.0, 176.9. IR (film):  $\nu$  1125, 1277, 1478, 1745, 2956, 3409,  $\text{cm}^{-1}$ . HRMS (ESI)  $m/z$  calcd for  $\text{C}_{20}\text{H}_{34}\text{O}_4\text{Si}$  ( $\text{M}+\text{Na}$ ) $^+$  389.2118, found 389.2116.

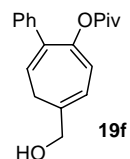

(1*E*,3*E*,6*Z*)-4-(hydroxymethyl)-7-phenylcyclohepta-1,3,6-trienyl pivalate (**19f**).

Yield : 81%, 48 mg, (regioisomeric ratio = 20:1), oil.  $^1\text{H}$  NMR (400 MHz,  $\text{CDCl}_3$ ):  $\delta$  0.89 (s, 9 H), 1.59 (broad, 1 H), 2.64 (d,  $J = 7.5$  Hz, 2 H), 4.29 (d,  $J = 1.5$  Hz, 2 H), 5.54 (t,  $J = 7.5$  Hz, 1 H), 6.19 (td,  $J = 1.5, 6.5$  Hz, 1 H), 6.49 (d,  $J = 6.5$  Hz, 1 H), 7.21-7.34 (m, 5 H).  $^{13}\text{C}$  NMR (100 MHz,  $\text{CDCl}_3$ ):  $\delta$  26.6, 29.3, 38.5, 65.9, 118.4, 120.8, 122.0, 127.4, 127.8, 129.2, 137.6, 137.8, 138.2, 150.1, 176.7. IR (film):  $\nu$  3356, 2966, 1744, 1278, 1130, 1013, 765, 731, 698  $\text{cm}^{-1}$ . HRMS (ESI)  $m/z$  calcd. For  $\text{C}_{19}\text{H}_{22}\text{O}_3$  ( $\text{M}+\text{Na}$ ) $^+$  321.1461, found 321.1468.

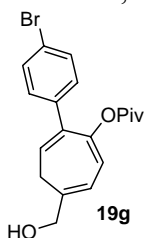

(1*E*,3*E*,6*Z*)-7-(4-bromophenyl)-4-(hydroxymethyl)cyclohepta-1,3,6-trienyl pivalate (**19g**).

Yield : 76%, 57 mg, (regioisomeric ratio > 20:1), oil.  $^1\text{H}$  NMR (400 MHz,  $\text{CDCl}_3$ ):  $\delta$  0.93 (s, 9 H), 1.58 (s, 1 H), 2.63 (d,  $J = 7.6$  Hz, 2 H), 4.30 (s, 2 H), 5.53 (t,  $J = 7.6$  Hz, 1 H), 6.19 (d,  $J = 6.0$  Hz, 1 H), 6.49 (d,  $J = 6.0$  Hz, 1 H), 7.12 (d,  $J = 8.0$  Hz, 2 H), 7.41 (d,  $J = 8.0$  Hz, 2 H).  $^{13}\text{C}$  NMR (100 MHz,  $\text{CDCl}_3$ ):  $\delta$  26.7, 29.3, 38.6, 65.9, 118.4, 121.3, 121.5, 122.3, 130.8, 131.0, 136.5, 136.8, 138.3, 149.5, 176.6. IR (film):  $\nu$  1131,

1263, 1484, 1742, 2967, 3386  $\text{cm}^{-1}$ . HRMS (ESI)  $m/z$  calcd for  $\text{C}_{19}\text{H}_{21}\text{BrO}_3$  ( $\text{M}+\text{Na}$ )<sup>+</sup> 399.0566, found 399.0565.

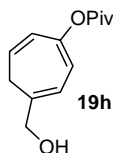

(1E,3E,6Z)-4-(hydroxymethyl)cyclohepta-1,3,6-trienyl pivalate (**19h**).

Yield : 16%, 7 mg, (regioisomeric ratio > 20:1), oil. <sup>1</sup>H NMR (400 MHz,  $\text{CDCl}_3$ ):  $\delta$  1.29 (s, 9 H), 1.61 (s, 1 H), 2.52 (d,  $J = 7.2$  Hz, 2 H), 4.25 (s, 2 H), 5.49 (td,  $J = 7.2, 9.6$  Hz, 1 H), 5.95 (dd,  $J = 1.6, 9.6$  Hz, 1 H), 6.16 (td,  $J = 1.2, 6.4$  Hz, 1 H), 6.26 (dd,  $J = 1.6, 6.4$  Hz, 1 H). <sup>13</sup>C NMR (100 MHz,  $\text{CDCl}_3$ ):  $\delta$  27.1, 29.2, 38.9, 66.3, 118.8, 119.2, 122.9, 124.4, 134.7, 151.0, 177.3. IR (film):  $\nu$  732, 907, 1053, 1112, 1278, 1410, 1478, 1747, 2971, 3365  $\text{cm}^{-1}$ . HRMS (ESI)  $m/z$  calcd. For  $\text{C}_{13}\text{H}_{18}\text{O}_3$  ( $\text{M}+\text{Na}$ )<sup>+</sup> 245.1148, found 245.1160.

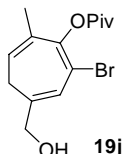

2,2-Dimethyl-propionic

acid

2-bromo-4-hydroxymethyl-7-methyl-cyclohepta-1,3,6-trienyl ester (**19j**).

Yield : 34%, 21 mg, (regioisomeric ratio > 20:1), oil. <sup>1</sup>H NMR (500 MHz,  $\text{CDCl}_3$ )  $\delta$  1.37 (s, 9 H), 1.76 - 1.83 (m, 3 H), 2.49 (br, 2 H), 4.26 (s, 2 H), 5.42 (tq,  $J = 7.10, 1.60$  Hz, 1 H), 6.29 (t,  $J = 1.56$  Hz, 1 H). <sup>13</sup>C NMR ( $\text{CDCl}_3$ , 125MHz):  $\delta$  18.3, 27.5, 29.0, 39.6, 65.2, 116.1, 122.6, 123.5, 131.0, 140.5, 148.8, 175.8. IR (film):  $\nu$  3448, 2975, 2933, 2873, 2360, 1750, 1632, 1479, 1460, 1397, 1368, 1276, 1242, 1140, 1107, 1089, 1026, 915, 887, 845, 808, 784, 759, 732  $\text{cm}^{-1}$ . HRMS (ESI) for  $\text{C}_{14}\text{H}_{19}\text{BrO}_3$  ( $\text{M}+\text{Na}$ ), 337.0410 (calc.), found 337.0408.

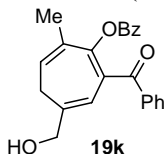

2-benzoyl-4-(hydroxymethyl)-7-methylcyclohepta-1,3,6-trienyl benzoate (**19k**).

Yield : 62%, 45 mg, (regioisomeric ratio = 5:1), oil. <sup>1</sup>H NMR (400MHz,  $\text{CDCl}_3$ )  $\delta$  1.80 (s, 3 H), 1.84 (s, 1 H), 2.70 (d,  $J = 6.8$  Hz, 2 H), 4.34 (s, 2 H), 5.55 (t,  $J = 7.2$  Hz, 1 H), 6.51 (s, 1 H), 7.22-7.32 (m, 5 H), 7.44-7.50(m, 1 H), 7.64-7.70 (m, 2 H), 7.76-7.82 (m, 2 H). <sup>13</sup>C NMR (100MHz,  $\text{CDCl}_3$ )  $\delta$  18.0, 29.4, 66.1, 118.7, 123.3, 128.4, 128.5, 128.6, 129.1, 129.9, 130.7, 131.1, 133.2, 133.6, 137.5, 138.4, 150.8, 164.3, 197.0. IR (film):  $\nu$  708, 735, 1023, 1058, 1115, 1144, 1177, 1264, 1316, 1450, 1597, 1661, 1735, 2924, 3409  $\text{cm}^{-1}$ . HRMS (ESI)  $m/z$  calcd. For  $\text{C}_{23}\text{H}_{20}\text{O}_4$  ( $\text{M}+\text{Na}$ )<sup>+</sup> 383.1253, found 383.1254.

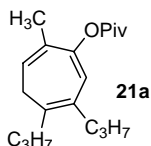

(1*E*,3*Z*,6*Z*)-7-methyl-3,4-dipropylcyclohepta-1,3,6-trienyl pivalate (**21a**).

Yield : 21%, 12 mg, oil. <sup>1</sup>H NMR (400 MHz, CDCl<sub>3</sub>): δ 0.85 (t, *J* = 7.2 Hz, 3 H), 0.91 (t, *J* = 7.2 Hz, 3 H), 1.31 (s, 9 H), 1.35-1.48 (m, 4 H), 1.74 (s, 3 H), 2.12-2.19 (m, 4 H), 2.31 (d, *J* = 7.6 Hz, 2 H), 5.32 (t, *J* = 7.6 Hz, 1 H), 6.14 (s, 1 H). <sup>13</sup>C NMR (100 MHz, CDCl<sub>3</sub>): δ 13.8, 14.1, 17.3, 23.4, 23.6, 27.2, 33.2, 34.1, 36.1, 38.9, 121.4, 123.9, 129.4, 133.2, 150.1, 177.2. IR (film): ν 733, 908, 1066, 1277, 1396, 1746, 2871, 2958 cm<sup>-1</sup>. HRMS (ESI) *m/z* calcd. For C<sub>19</sub>H<sub>30</sub>O<sub>2</sub> (M+Na)<sup>+</sup> 313.2138, found 313.2147.

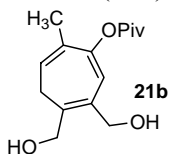

(1*E*,3*Z*,6*Z*)-7-methyl-3,4-dihydroxymethyl-1,3,6-trienyl pivalate (**21b**).

Yield : 80%, 43 mg, oil. <sup>1</sup>H NMR (400 MHz, CDCl<sub>3</sub>): δ 1.32 (s, 9 H), 1.77 (d, *J* = 1.2 Hz, 3 H), 2.43 (d, *J* = 7.2 Hz, 2 H), 2.73 (s, 2 H), 4.277 (s, 2 H), 4.283 (s, 2 H), 5.38 (qt, *J* = 1.2, 7.2 Hz, 1 H), 6.29 (s, 1 H). <sup>13</sup>C NMR (100 MHz, CDCl<sub>3</sub>): δ 17.4, 27.2, 31.4, 39.0, 62.2, 62.8, 120.8, 122.2, 130.2, 131.7, 132.5, 152.2, 177.2. IR (film): ν 731, 908, 1002, 1076, 1278, 1396, 1479, 1744, 2874, 2971, 3338 cm<sup>-1</sup>. HRMS (ESI) *m/z* calcd. For C<sub>15</sub>H<sub>22</sub>O<sub>4</sub> (M+Na)<sup>+</sup> 289.1410, found 289.1421.

nOe

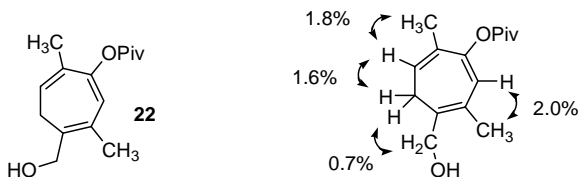

(1*E*,3*E*,6*Z*)-4-(hydroxymethyl)-3,7-dimethylcyclohepta-1,3,6-trienyl pivalate (**22**).

Yield : 68%, 34 mg, (regioisomeric ratio = 5:1), oil. <sup>1</sup>H NMR (400 MHz, CDCl<sub>3</sub>): δ 1.31 (s, 9 H), 1.62 (broad, 1 H), 1.76 (d, *J* = 1.2 Hz, 3 H), 1.89 (s, 3 H), 2.47 (d, *J* = 7.6 Hz, 2 H), 4.25 (s, 2 H), 5.42 (qt, *J* = 1.2, 7.6 Hz, 1 H), 6.14 (s, 1 H). <sup>13</sup>C NMR (100 MHz, CDCl<sub>3</sub>): δ 17.4, 17.6, 27.2, 30.3, 38.9, 62.8, 122.2, 124.2, 127.4, 129.90, 129.94, 151.2, 177.0. IR (film): ν 906, 1004, 1075, 1278, 1396, 1459, 1479, 1638, 1745, 2971, 3349 cm<sup>-1</sup>. HRMS (ESI) *m/z* calcd. For C<sub>15</sub>H<sub>22</sub>O<sub>3</sub> (M+Na)<sup>+</sup> 273.1461, found 273.1469.

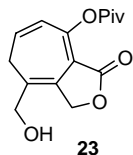

(3*aZ*,6*Z*,8*Z*)-3,5-dihydro-4-(hydroxymethyl)-1-oxo-1H-cyclohepta[*c*]furan-8-yl pivalate (**23**).

Yield : 71%, 39 mg, oil. <sup>1</sup>H NMR (400 MHz, CDCl<sub>3</sub>): δ 1.36 (s, 9 H), 2.54 (d, *J* = 7.2 Hz, 2 H), 2.80 (t, *J* = 5.6 Hz, 1 H), 4.29 (d, *J* = 4.8 Hz, 2 H), 5.00 (s, 2 H), 5.58 (td, *J* = 7.6, 9.6 Hz, 1 H), 6.16 (d, *J* = 9.6 Hz, 1 H). <sup>13</sup>C NMR (100 MHz, CDCl<sub>3</sub>): δ 27.0, 28.8,

39.1, 63.6, 68.3, 116.6, 123.8, 124.8, 125.2, 130.0, 153.4, 168.7, 176.6. IR (film):  $\nu$  906, 1100, 1364, 1746, 2360, 2971, 3461  $\text{cm}^{-1}$ . HRMS (ESI)  $m/z$  calcd. For  $\text{C}_{15}\text{H}_{18}\text{O}_5$   $(\text{M}+\text{Na})^+$  301.1046, found 301.1056.



References:

- 1) Zhao, L.; Lu, X.; Xu, W. *J. Org. Chem.* **2005**, *70*, 4059.
- 2) Kabbaj, Y.; Lazrek, H. B.; Barascut, J. L.; Imbach, J. L. *Nucleosides Nucleotides Nucleic Acids* **2005**, *24*, 161.
- 3) Trost, B. M.; Lee, D. C. *J. Org. Chem.* **1989**, *54*, 2271.
- 4) McDougal, P. G.; Rico, J. G.; Oh, Y.-I.; Condon, B. D. *J. Org. Chem.* **1986**, *51*, 3388.
- 5) Marshall, J. A.; Piettre, A.; Paige, M. A.; Valeriote, F. *J. Org. Chem.* **2003**, *68*, 1771.
- 6) Yang, X.; Zhai, H.; Li, Z. *Org. Lett.* **2008**, *10*, 2457.
- 7) Brancour, C.; Fukuyama, T.; Ohta, Y.; Ryu, I.; Dhimane, A. L.; Fensterbank, L.; Malacria, M. *Chem. Commun.* **2010**, *46*, 5470.

Copies of proton and carbon NMR spectra for substrates and products.

Note: See reference (*Angew. Chem. Int. Ed.*, **2011**, *50*, 8153-8156.) for  $^1\text{H}$  and  $^{13}\text{C}$  NMR spectra of compounds **1a-1o** and **2a-2o**.

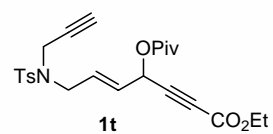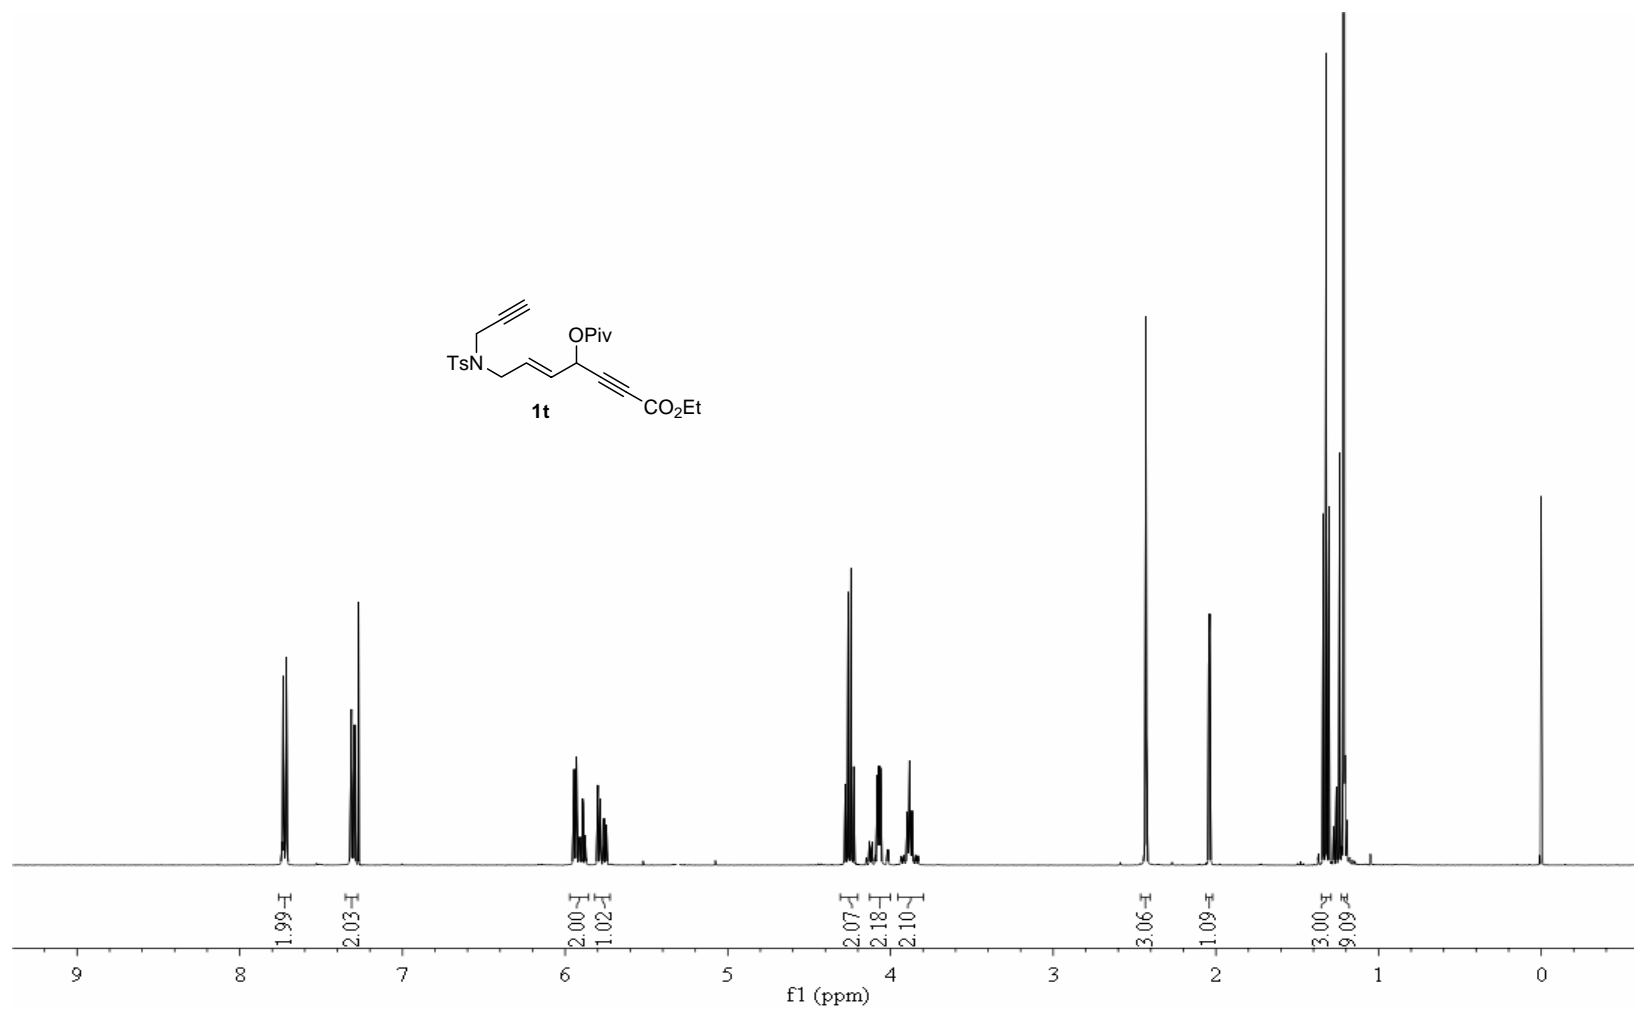

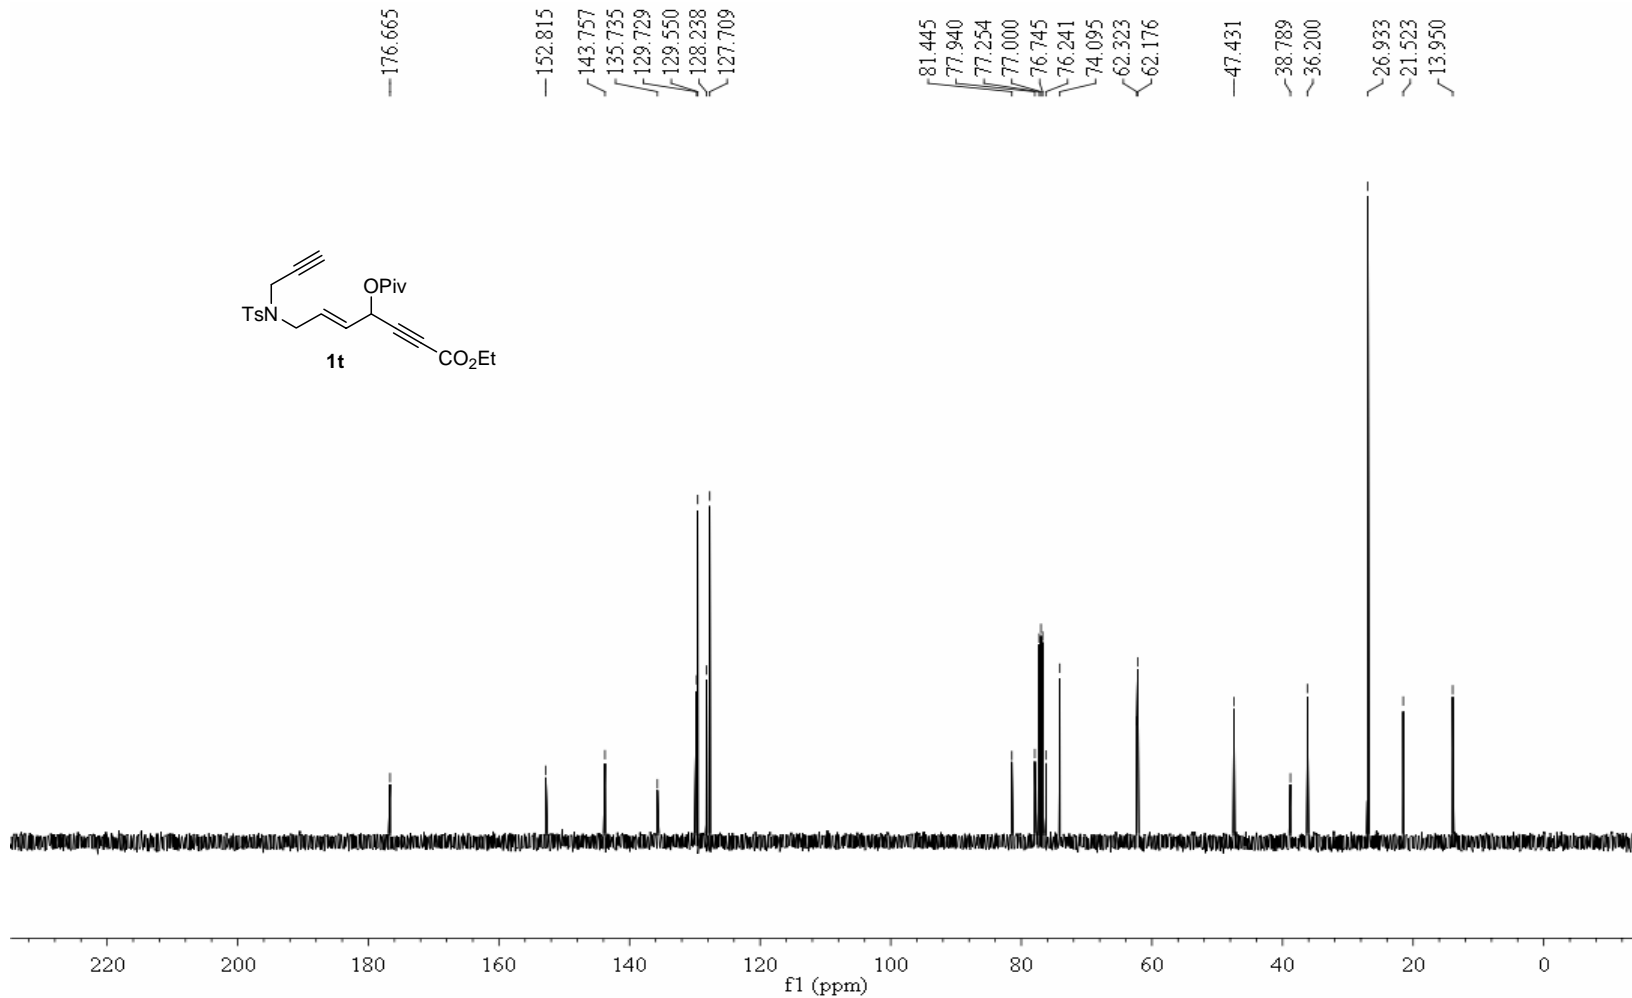

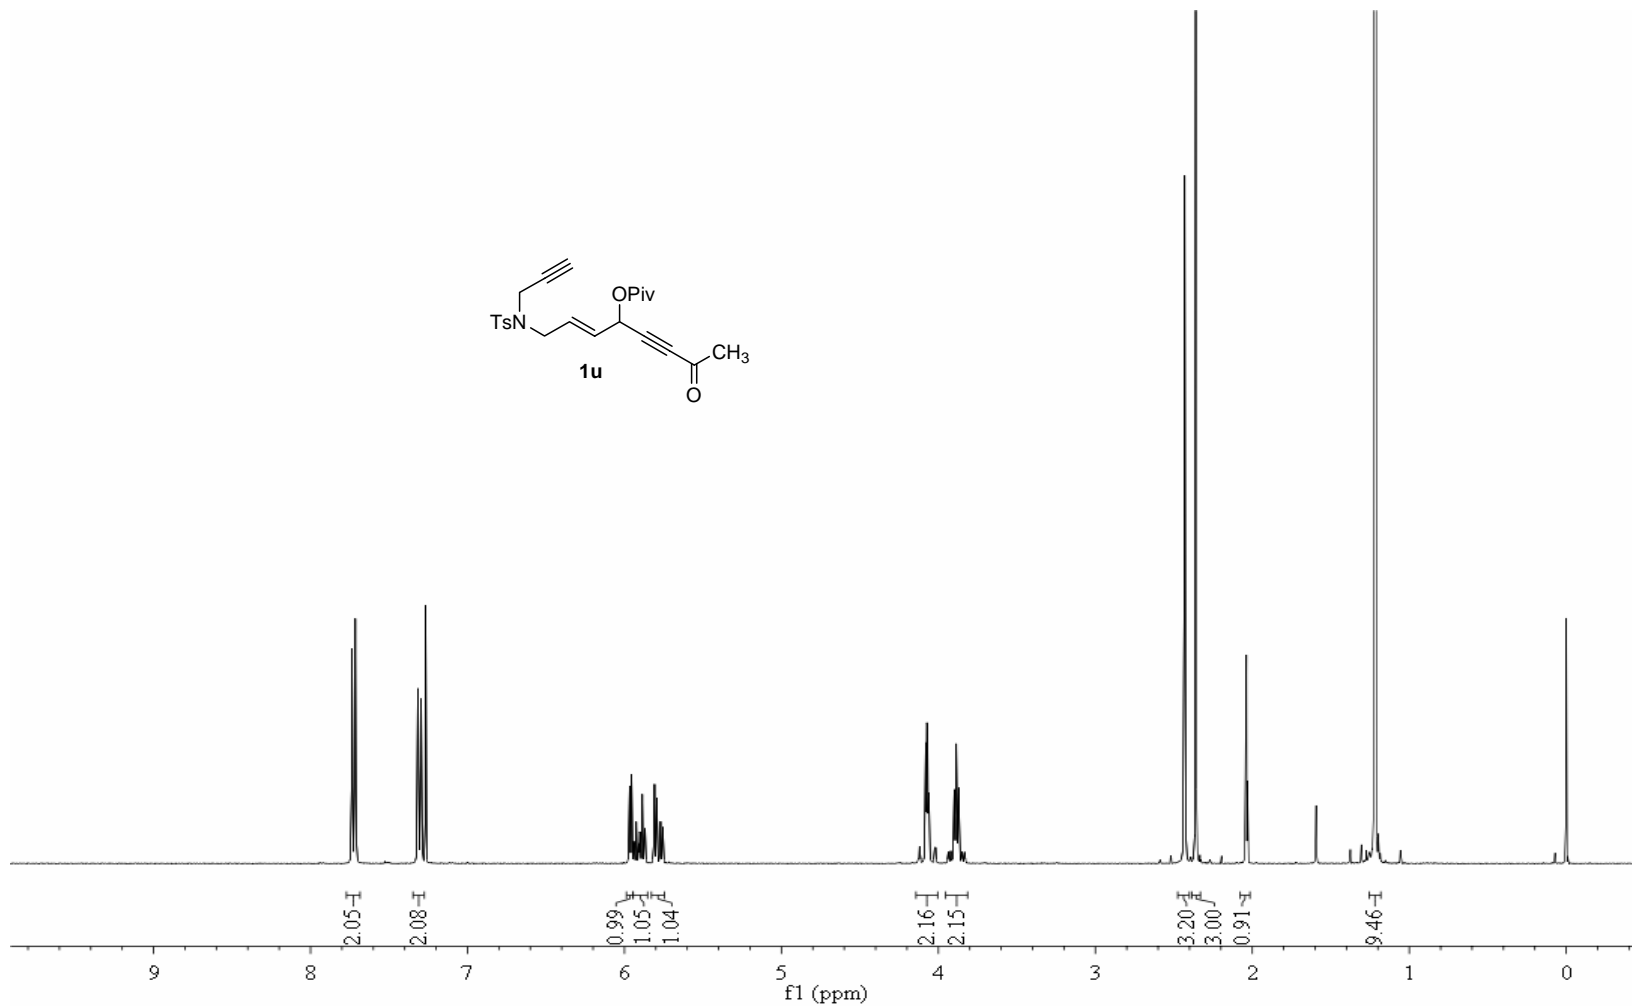

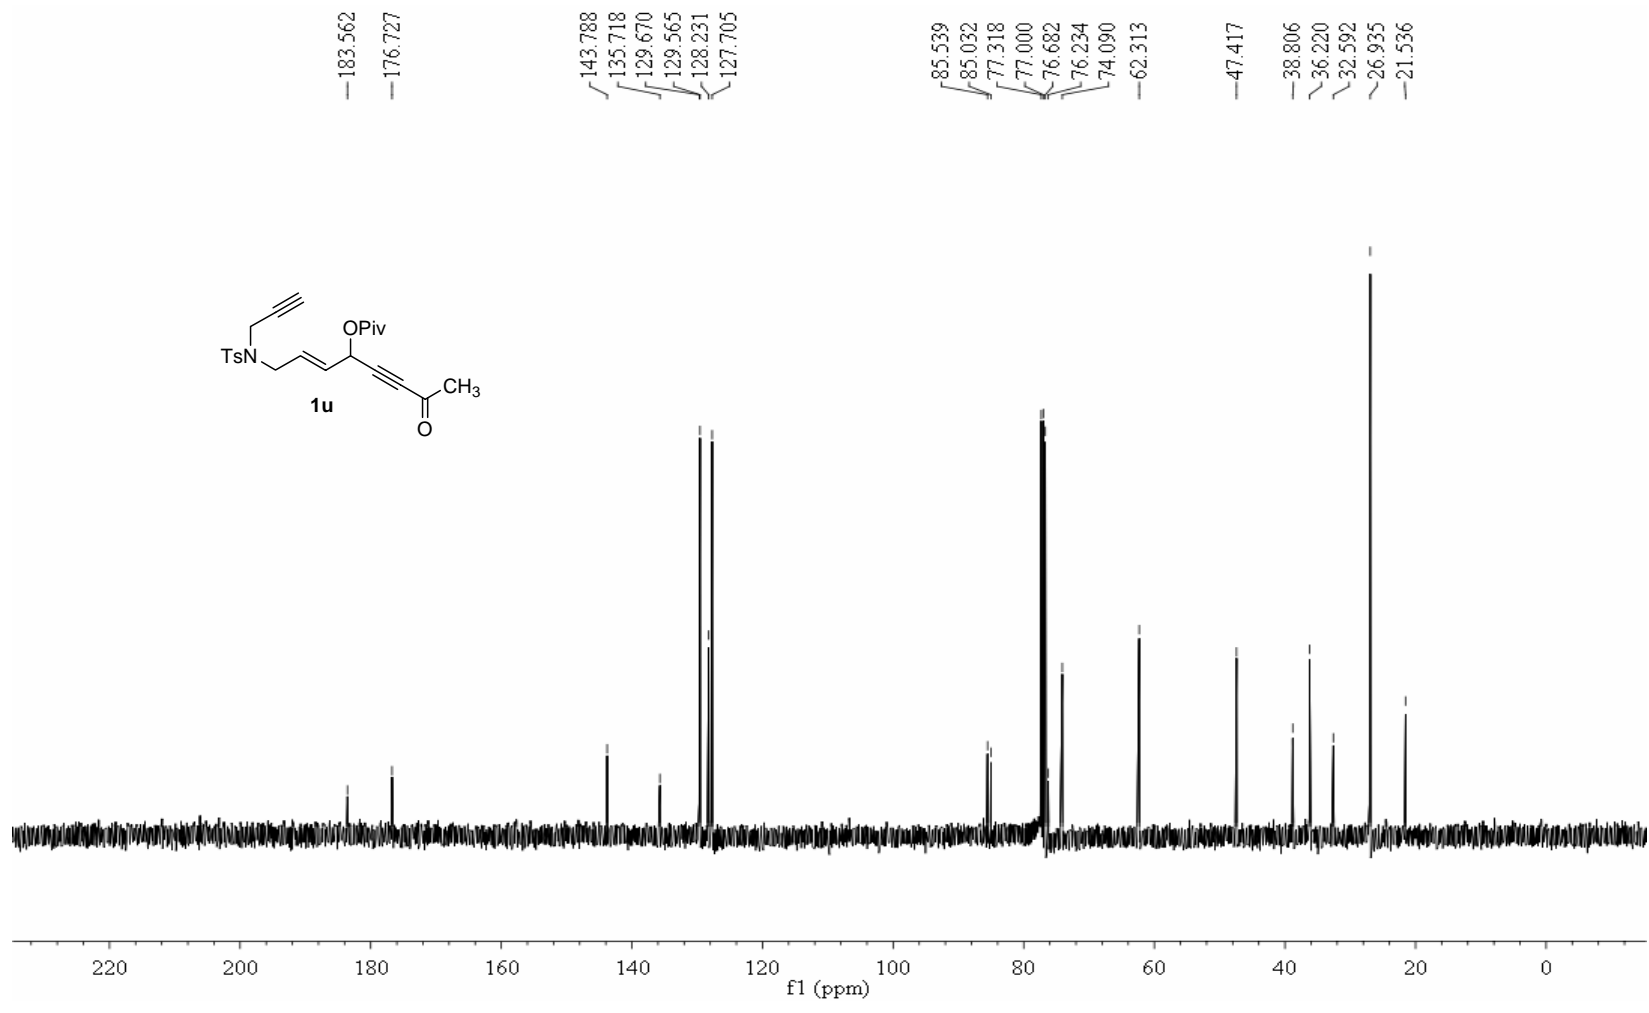

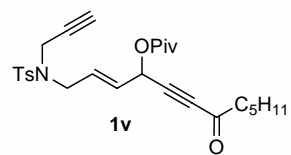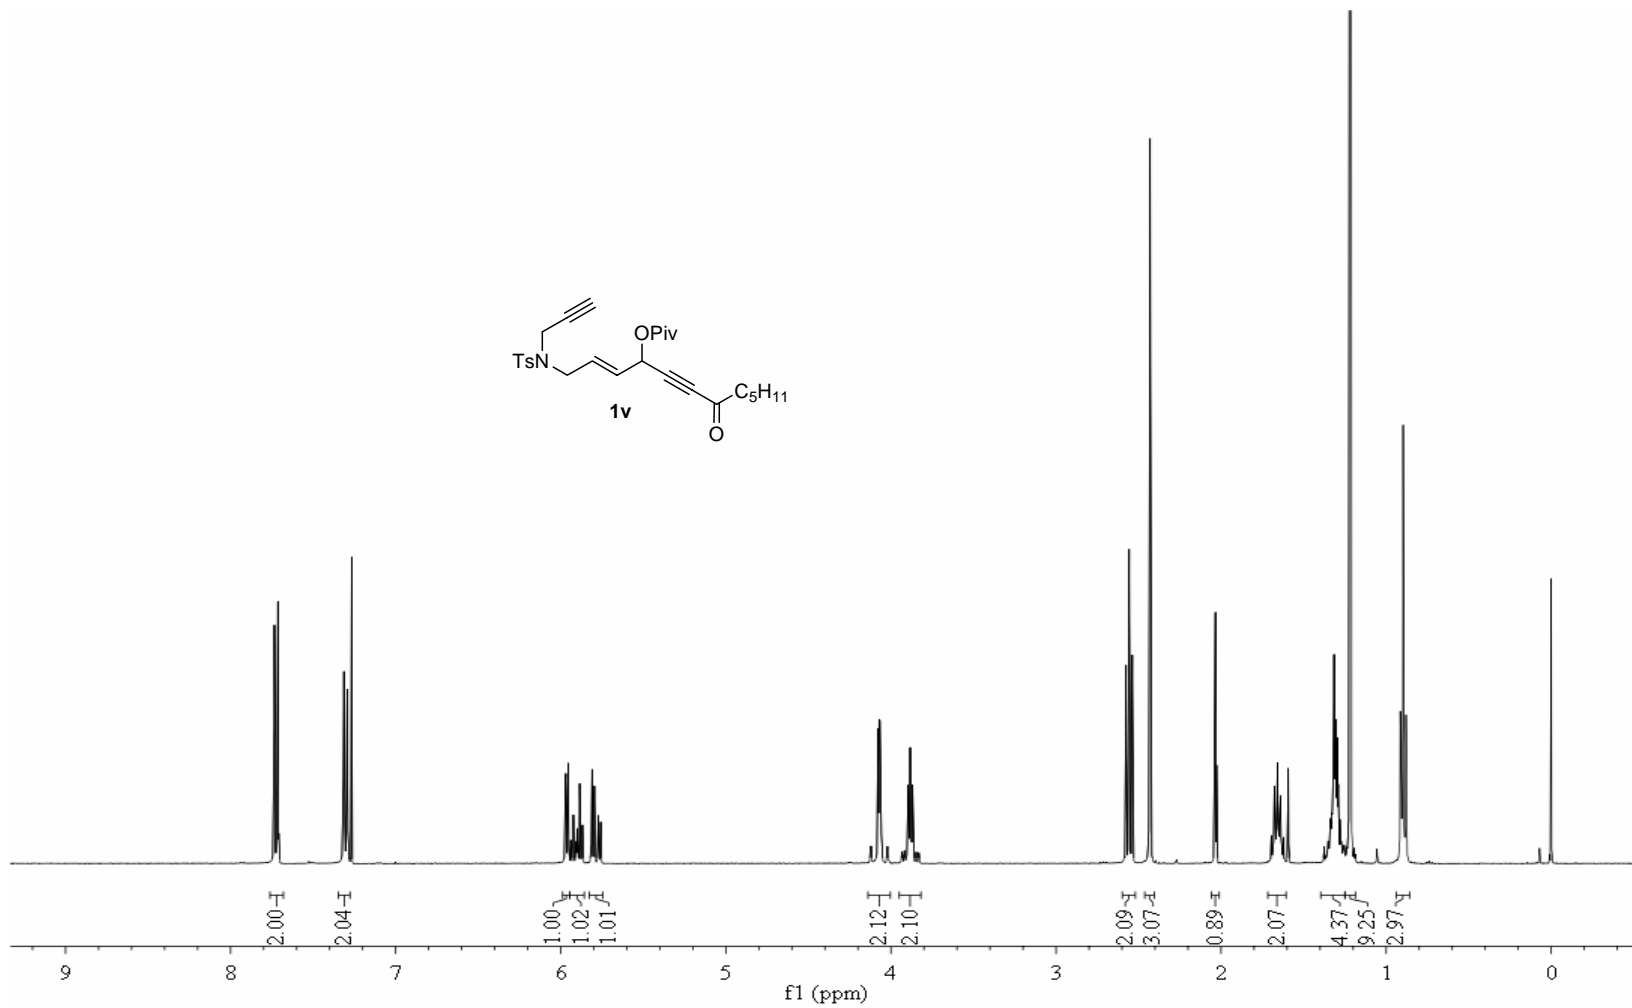

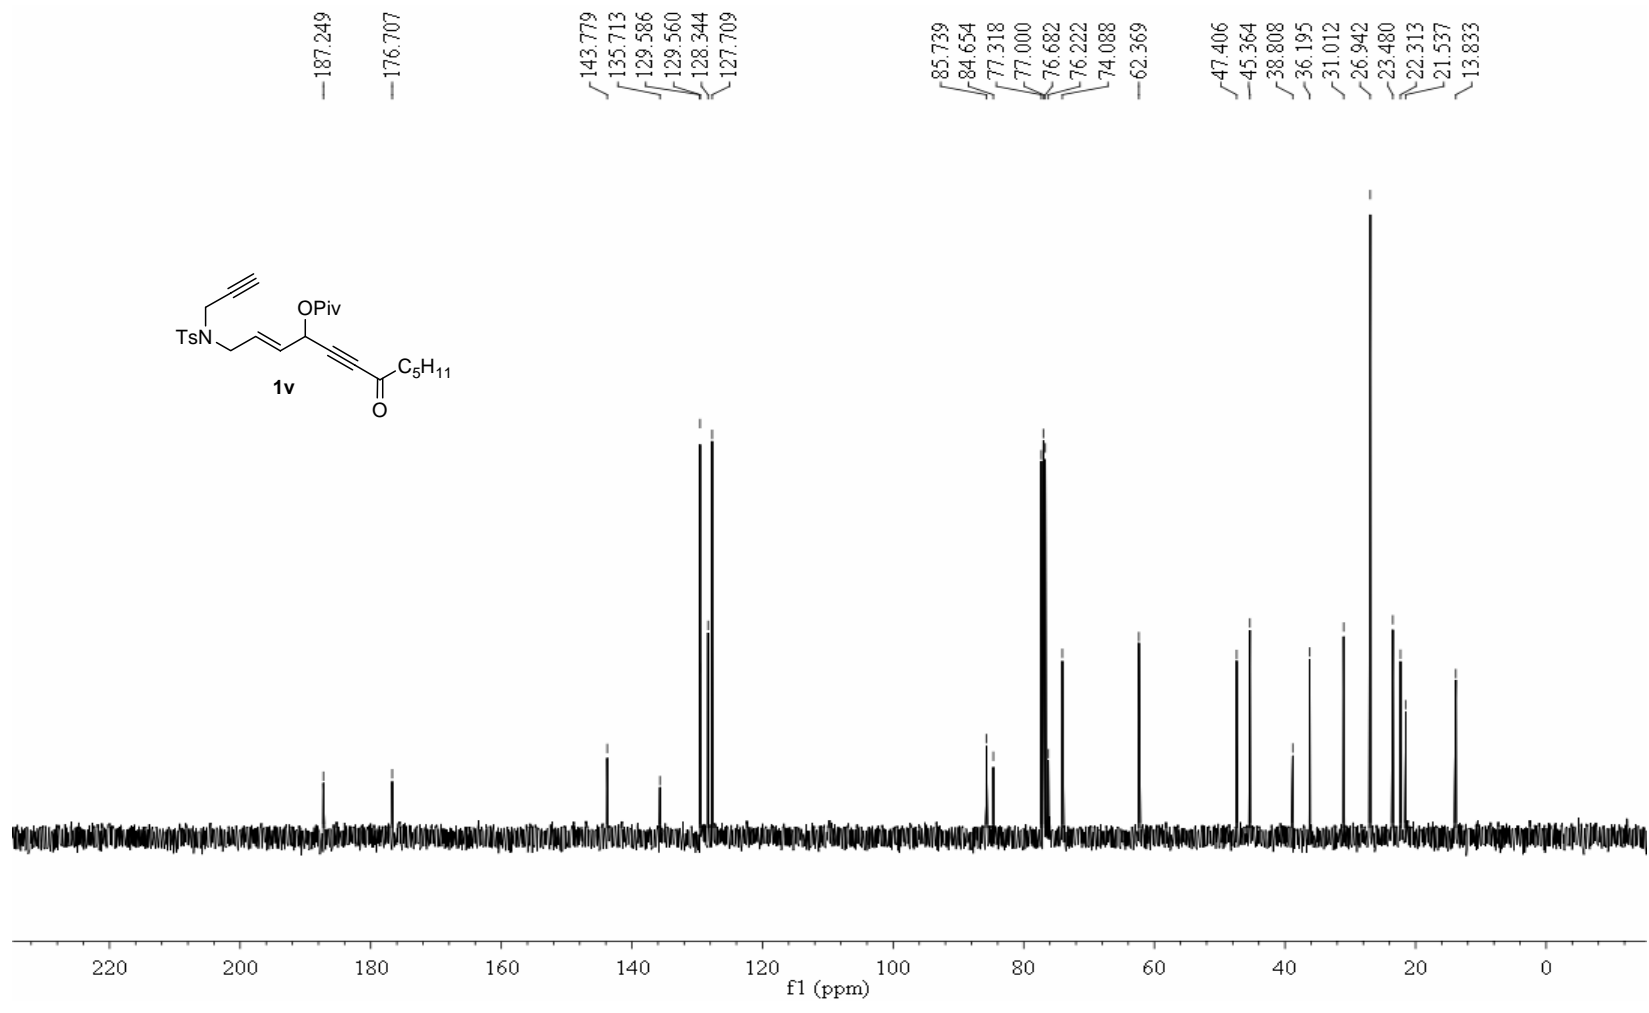



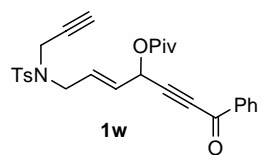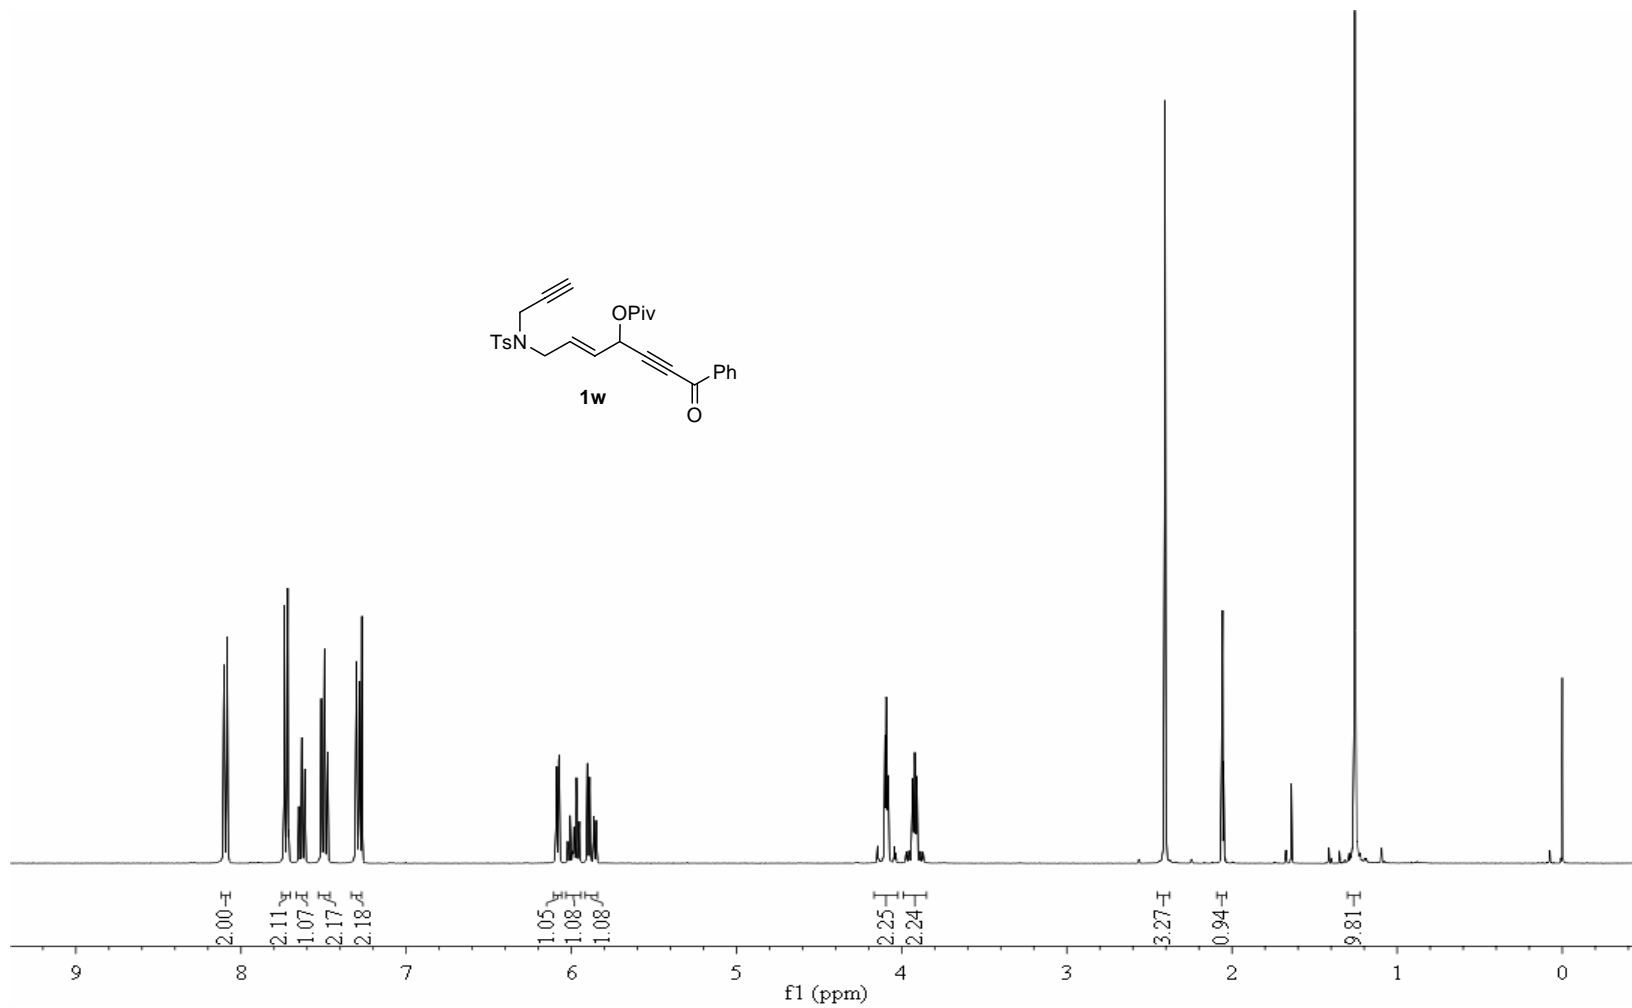

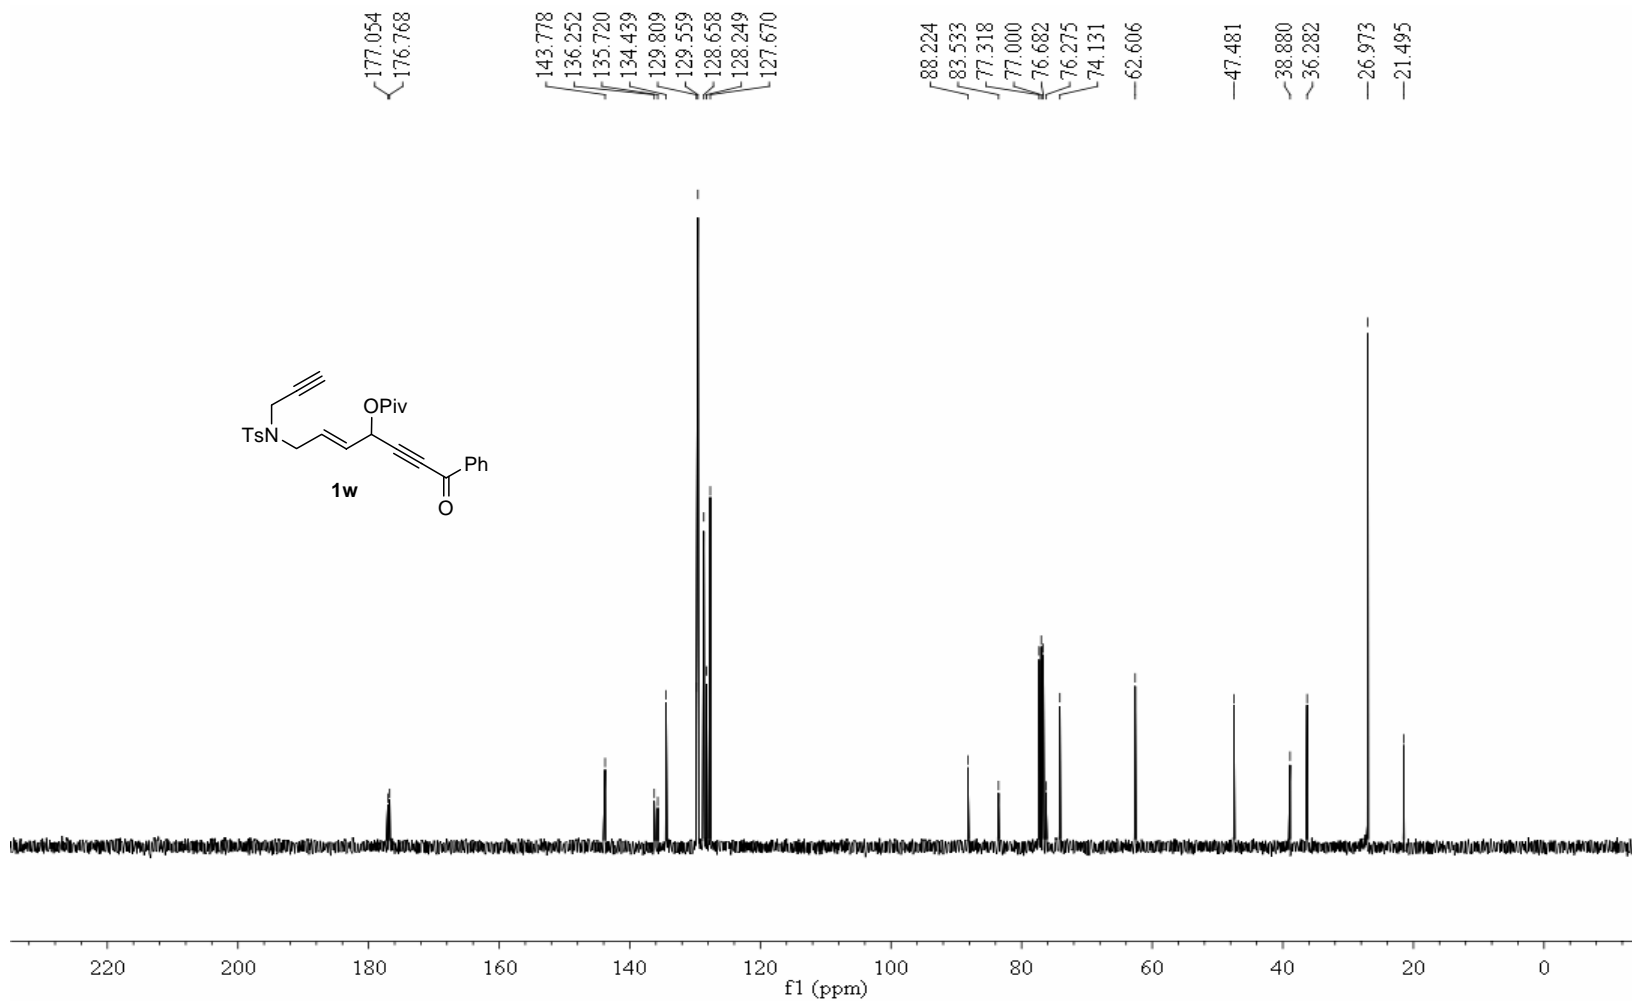

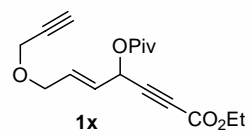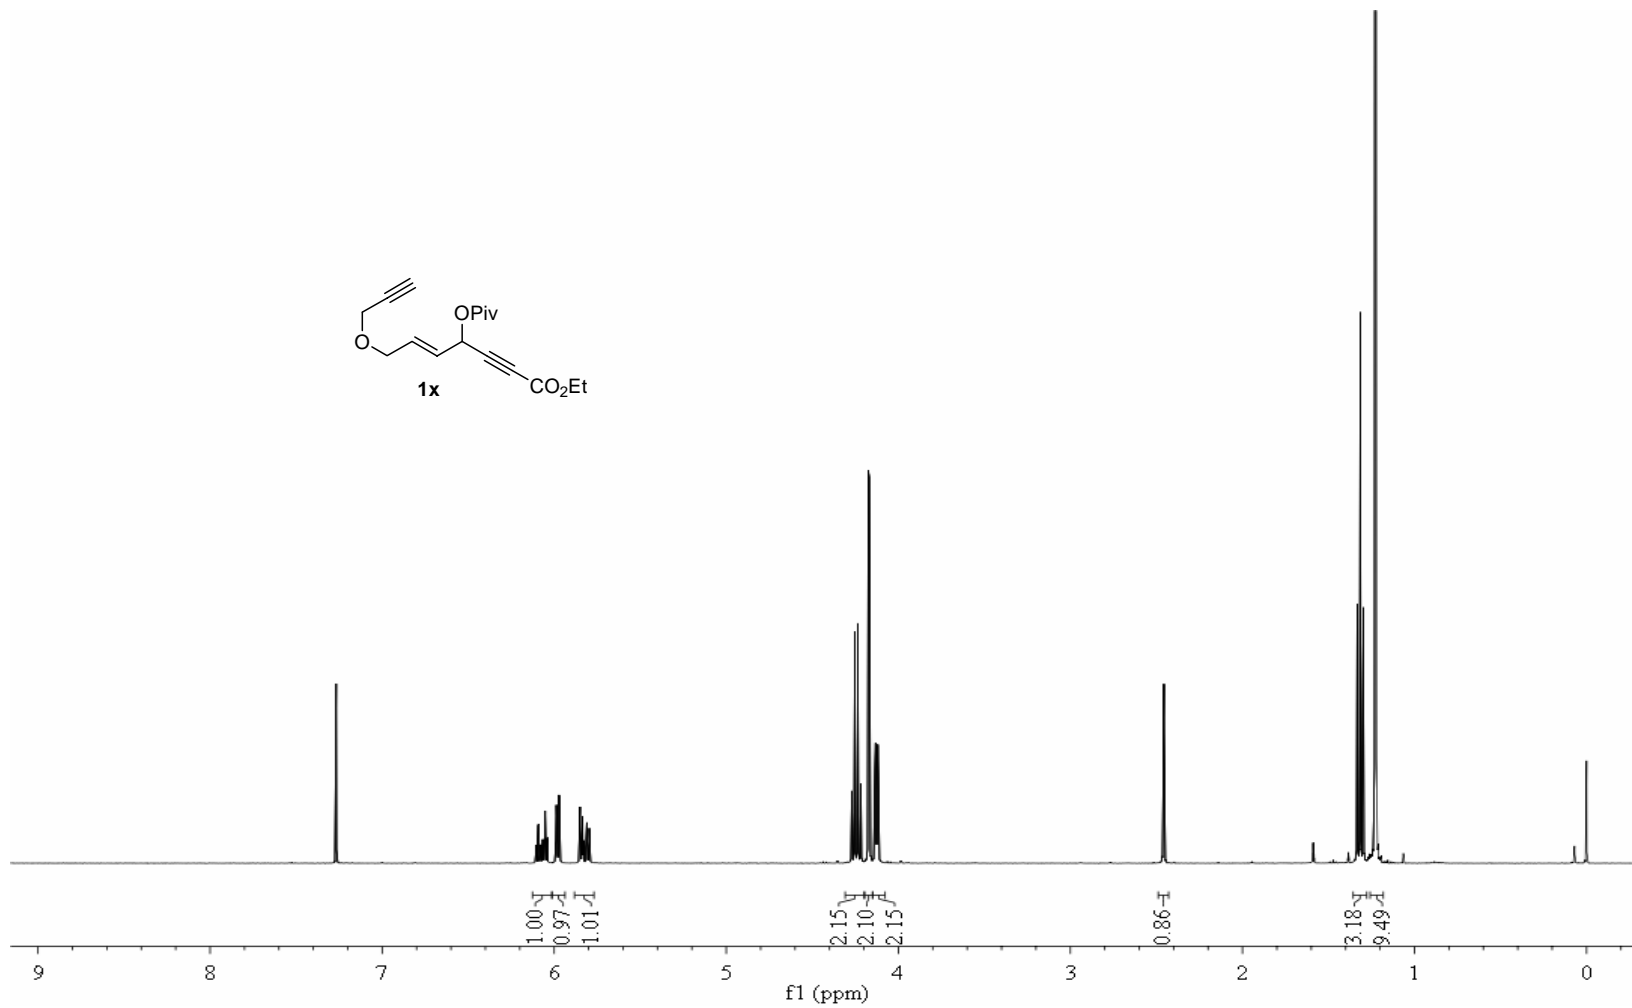

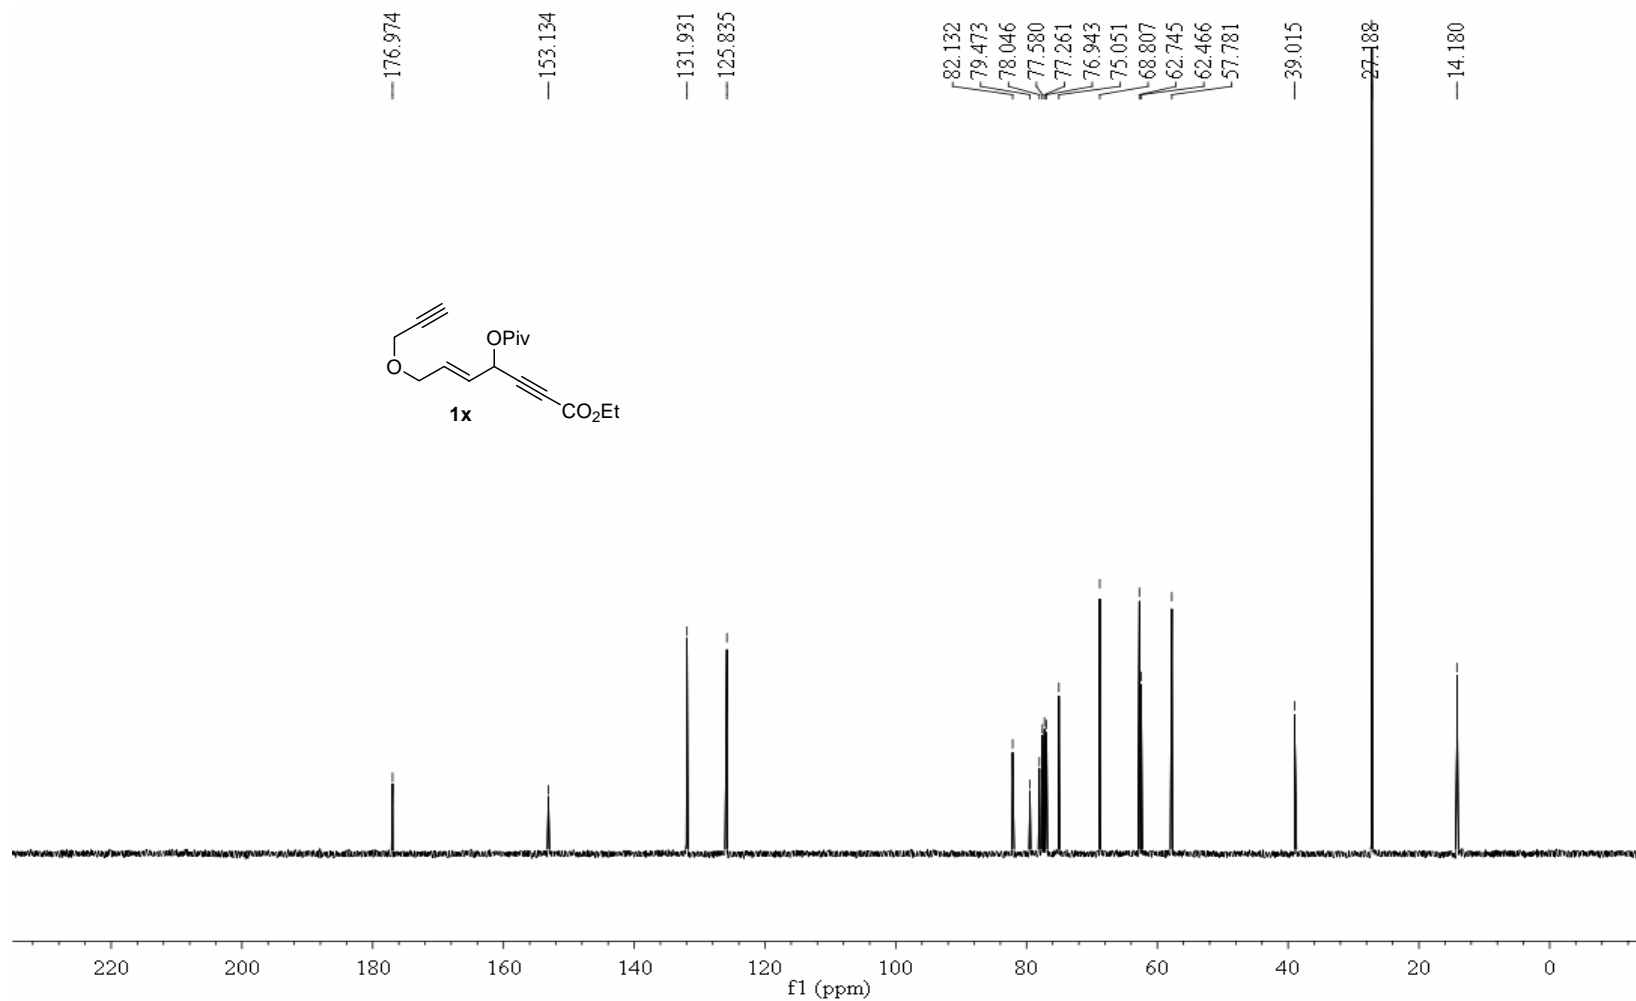

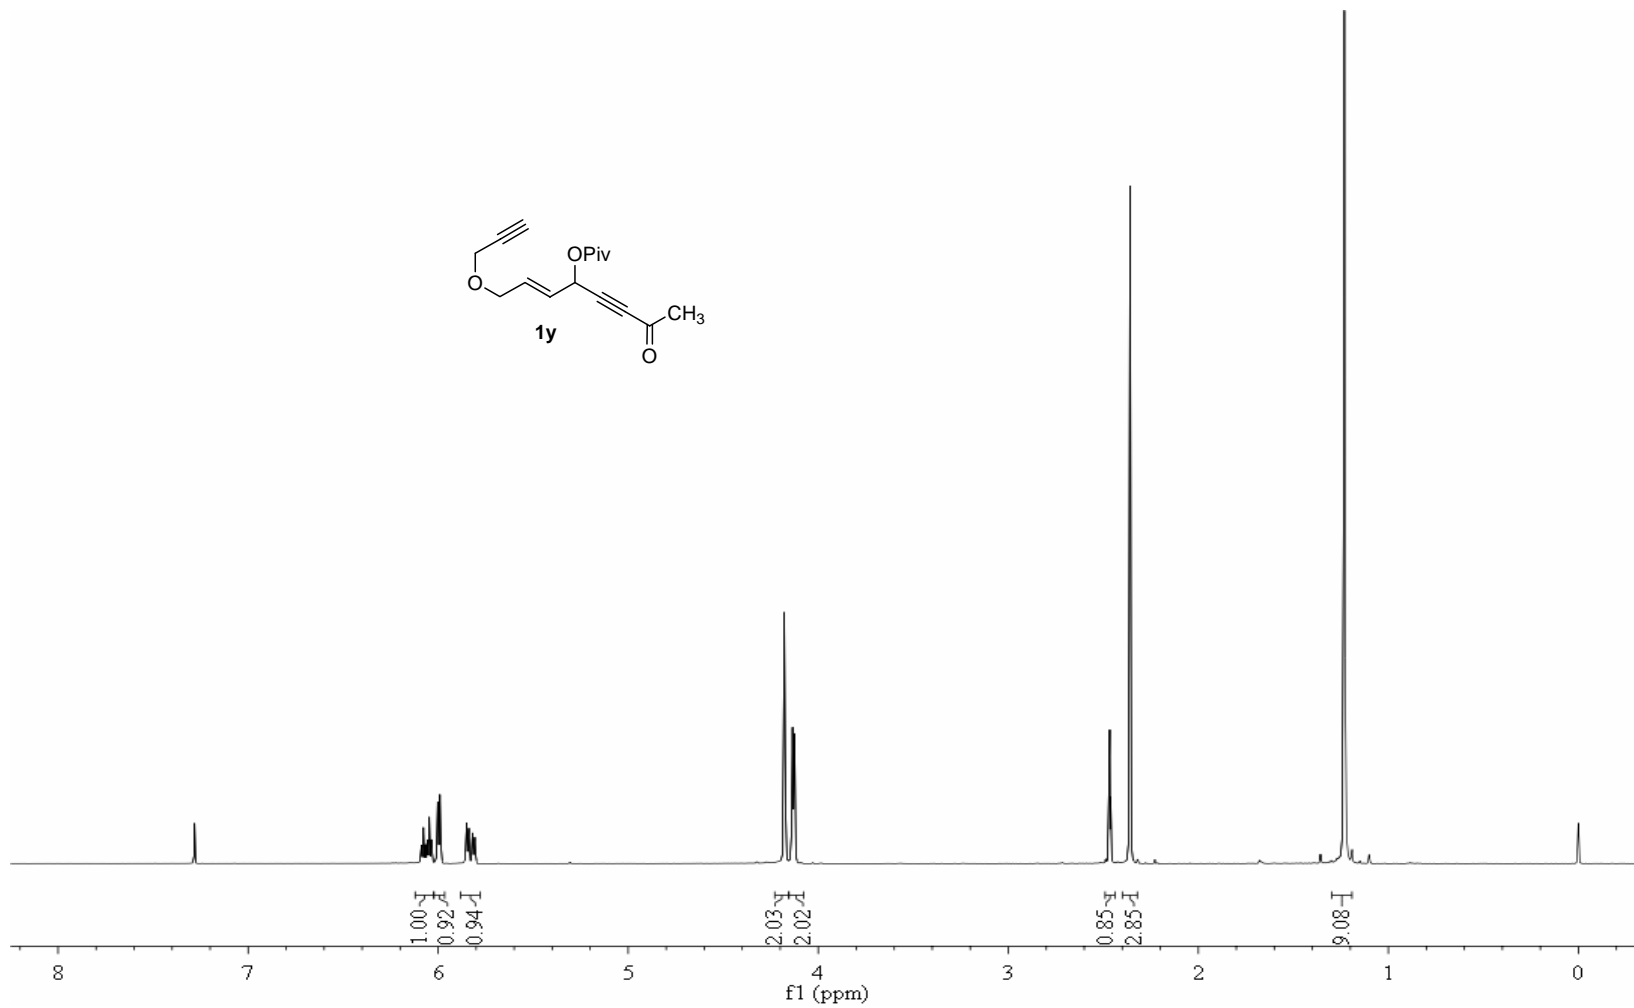

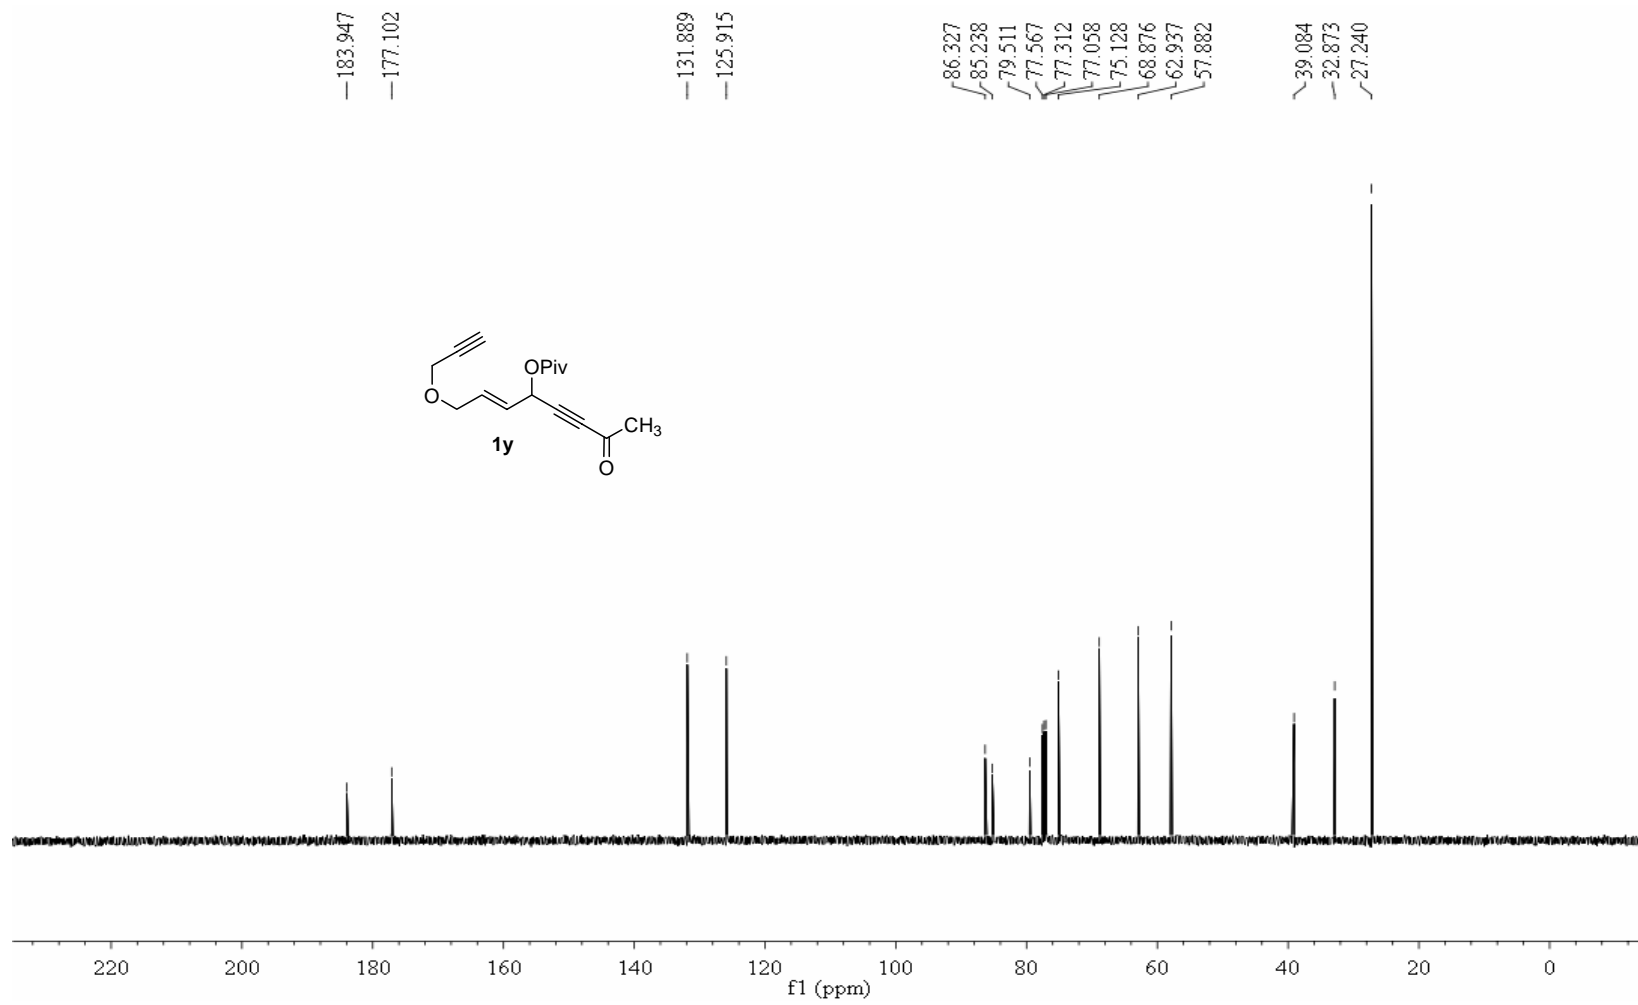

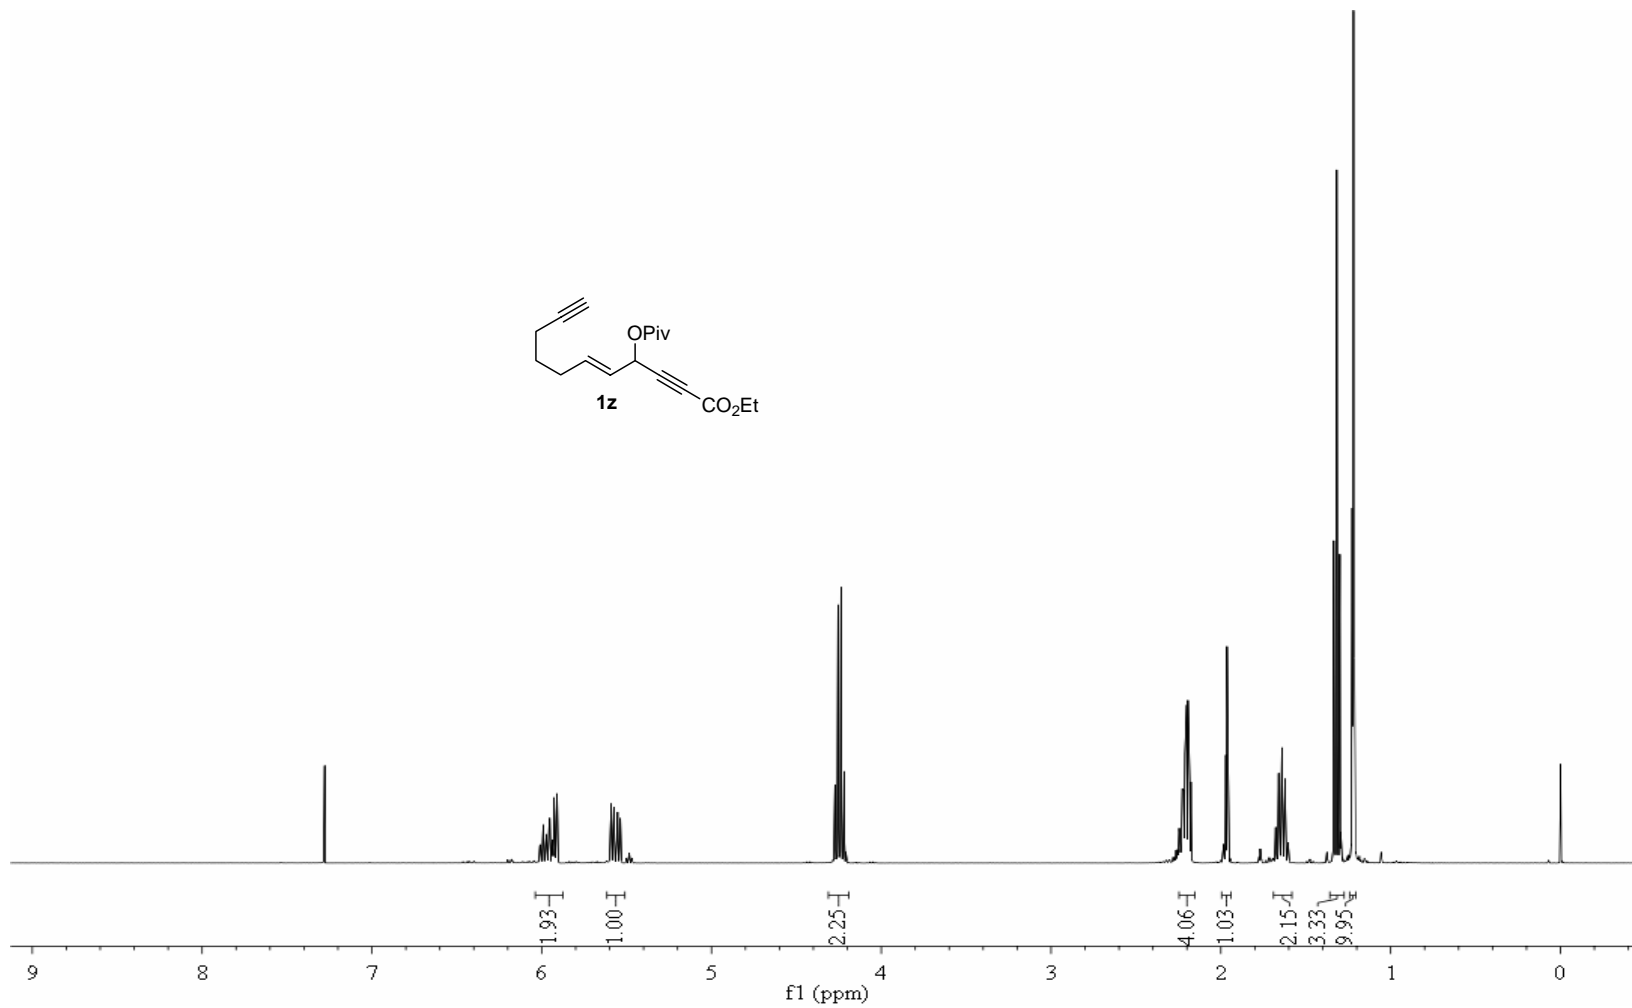

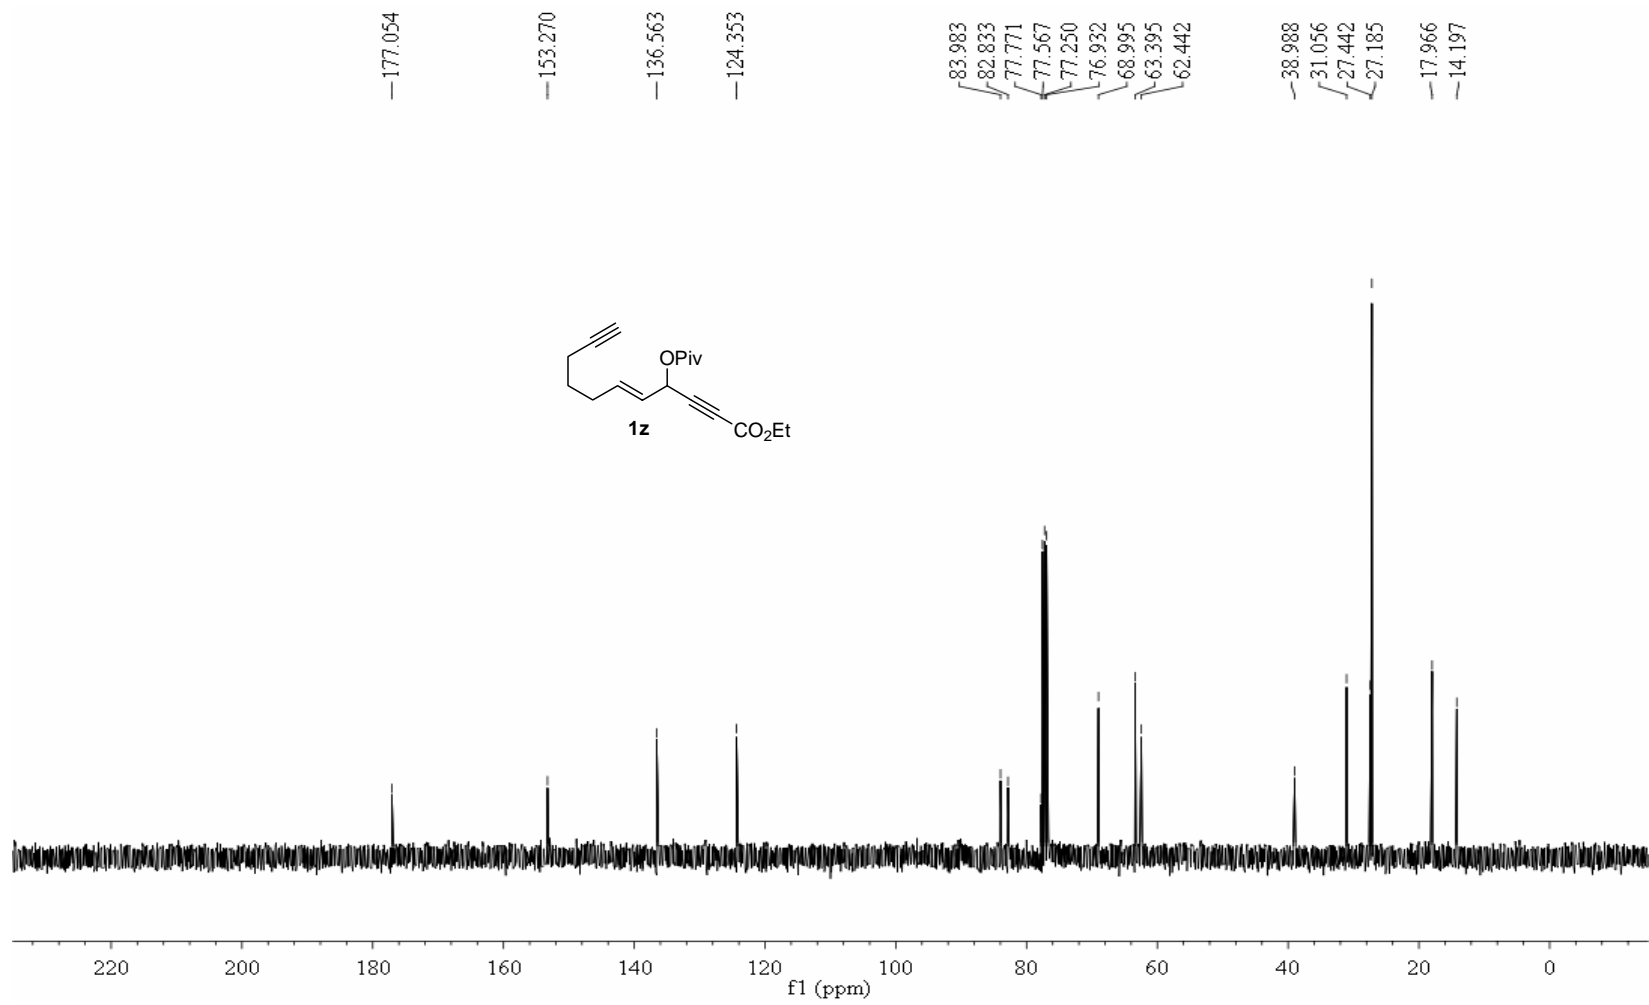



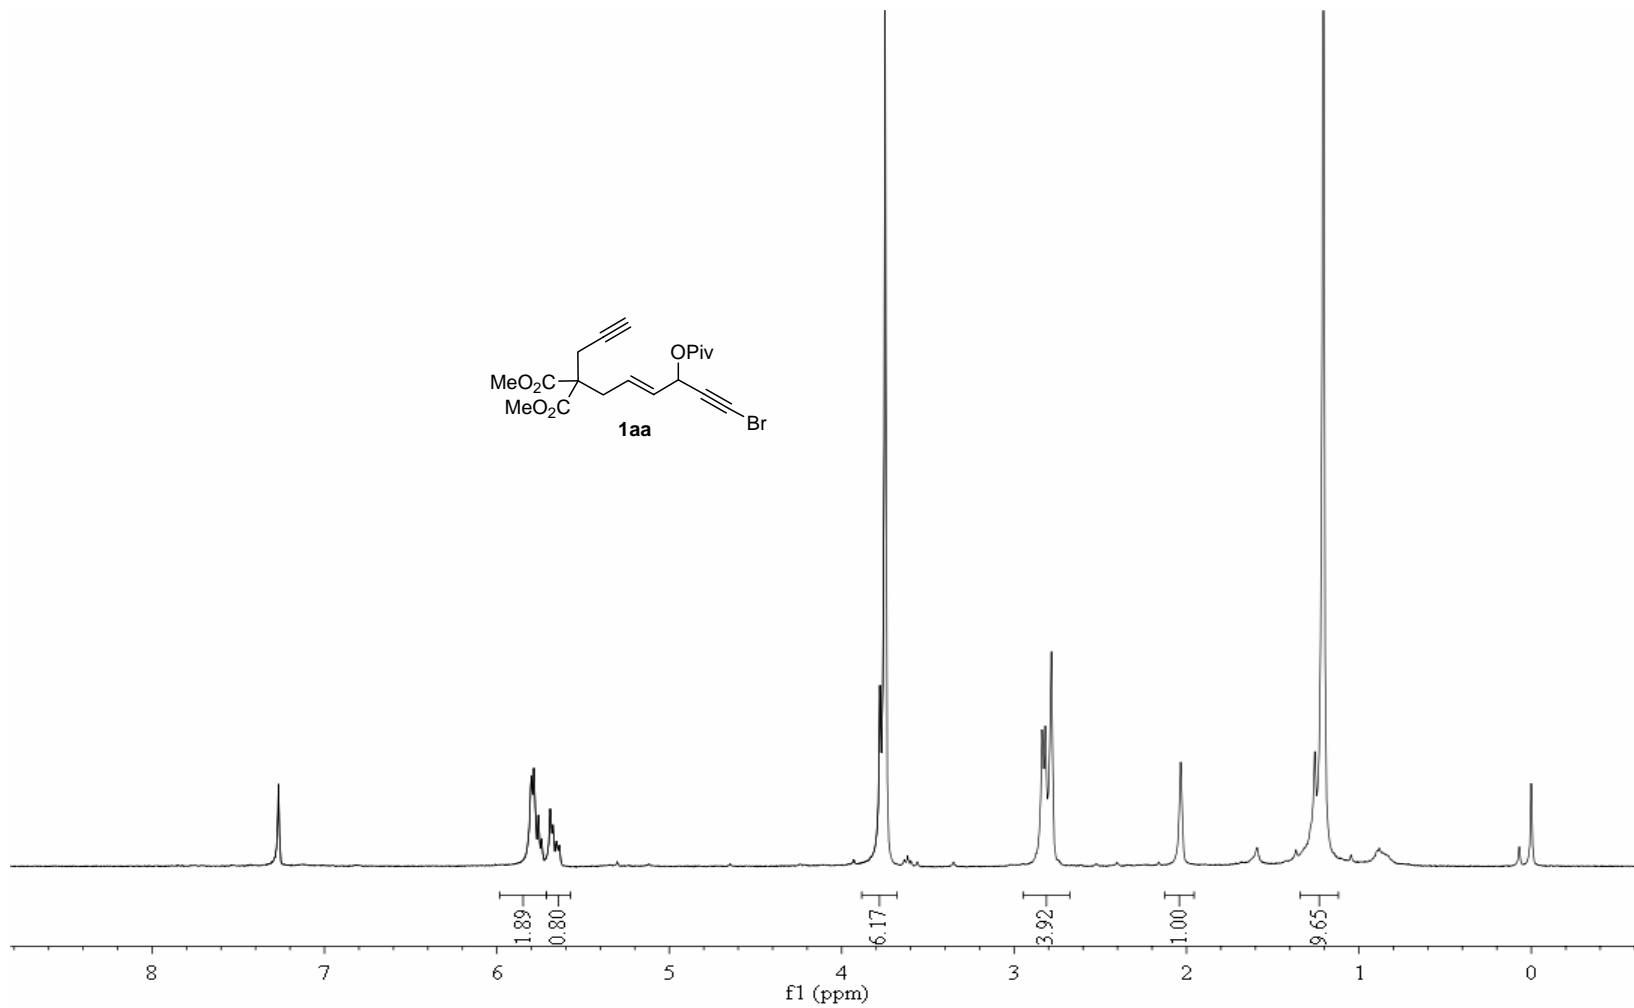

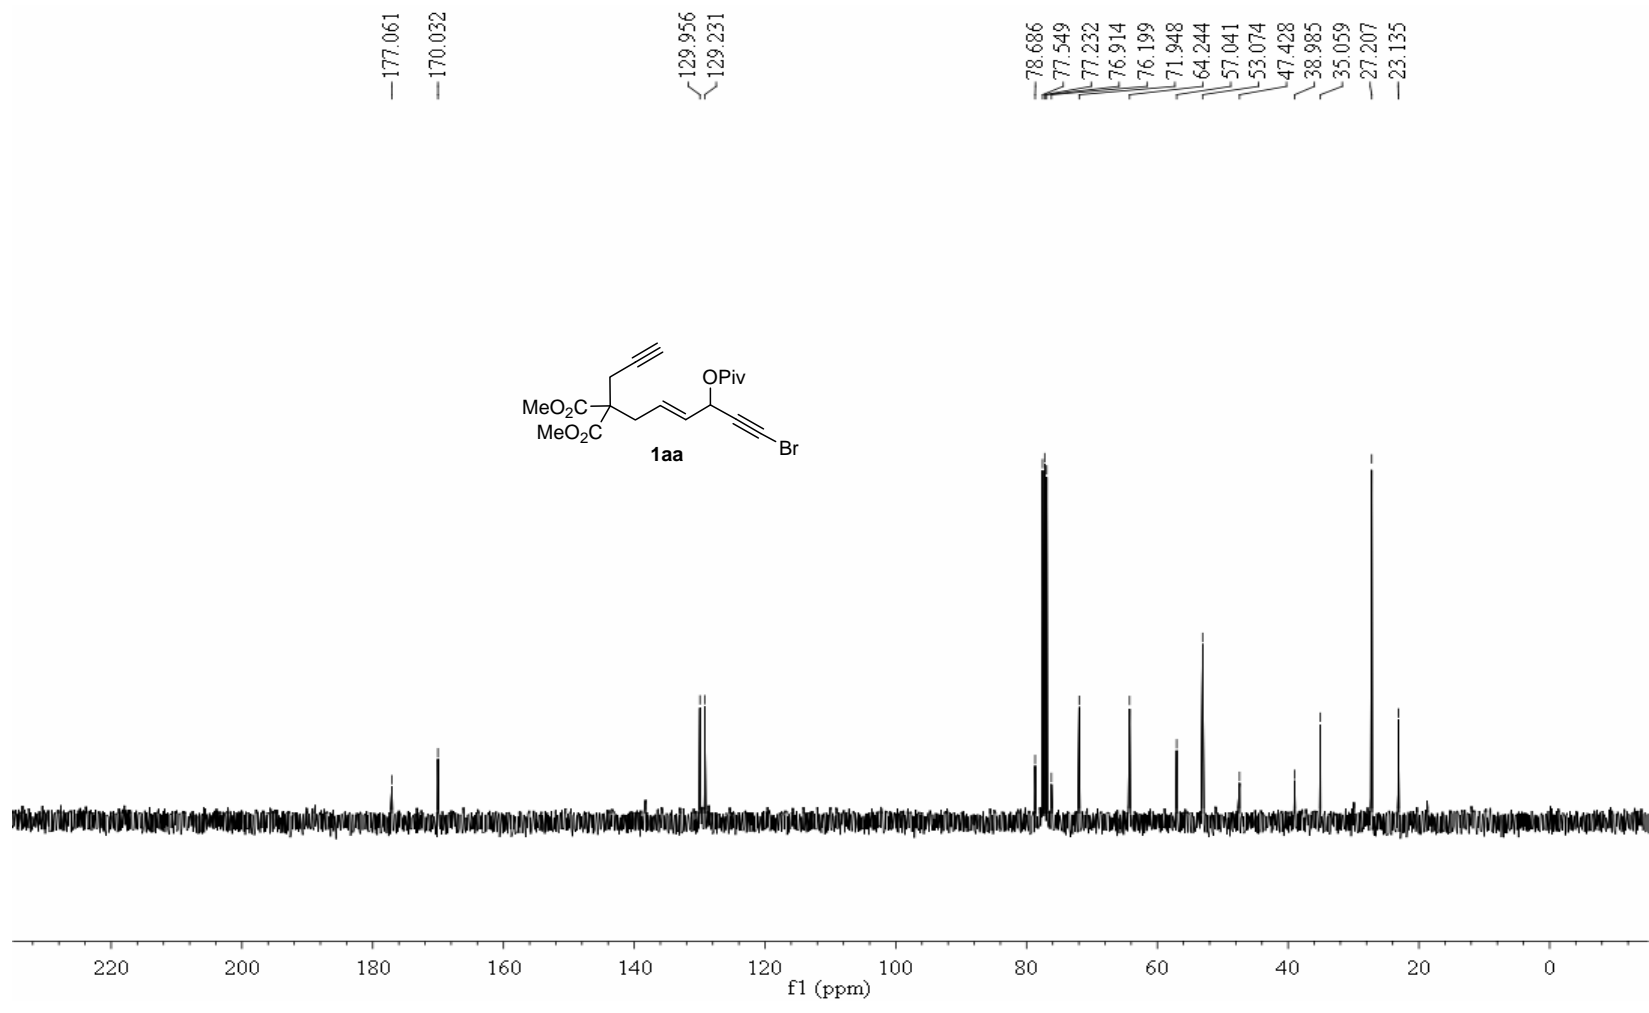

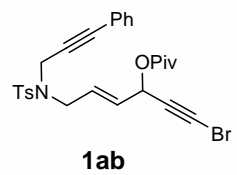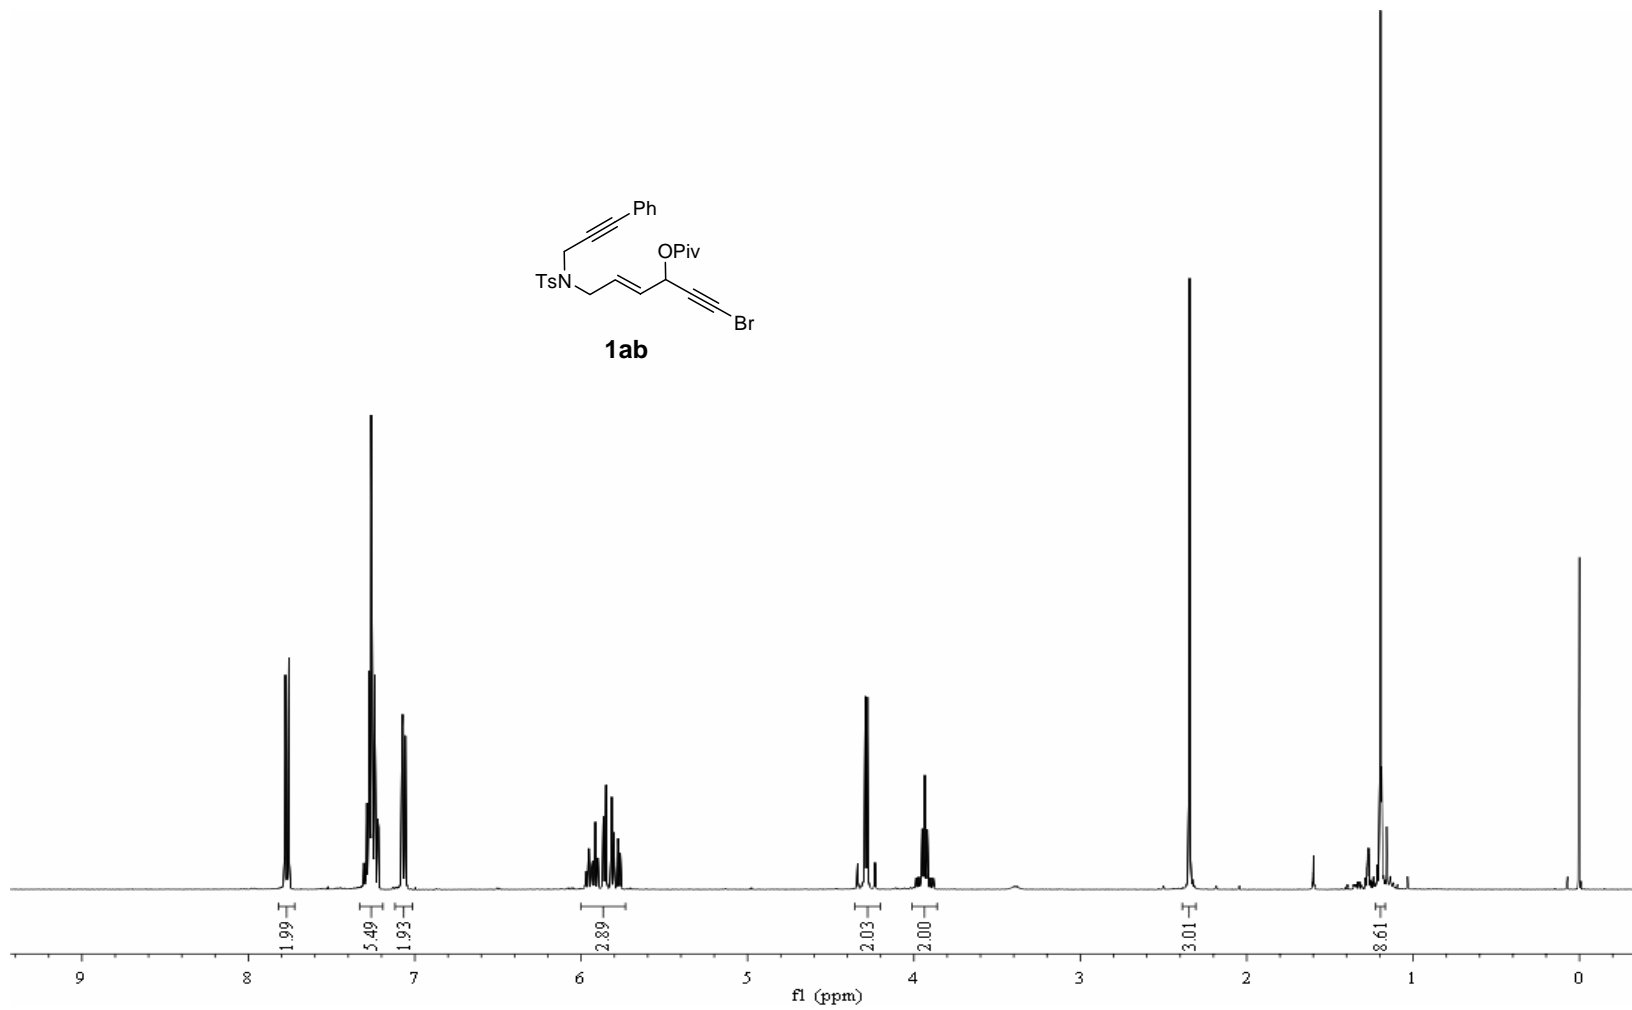

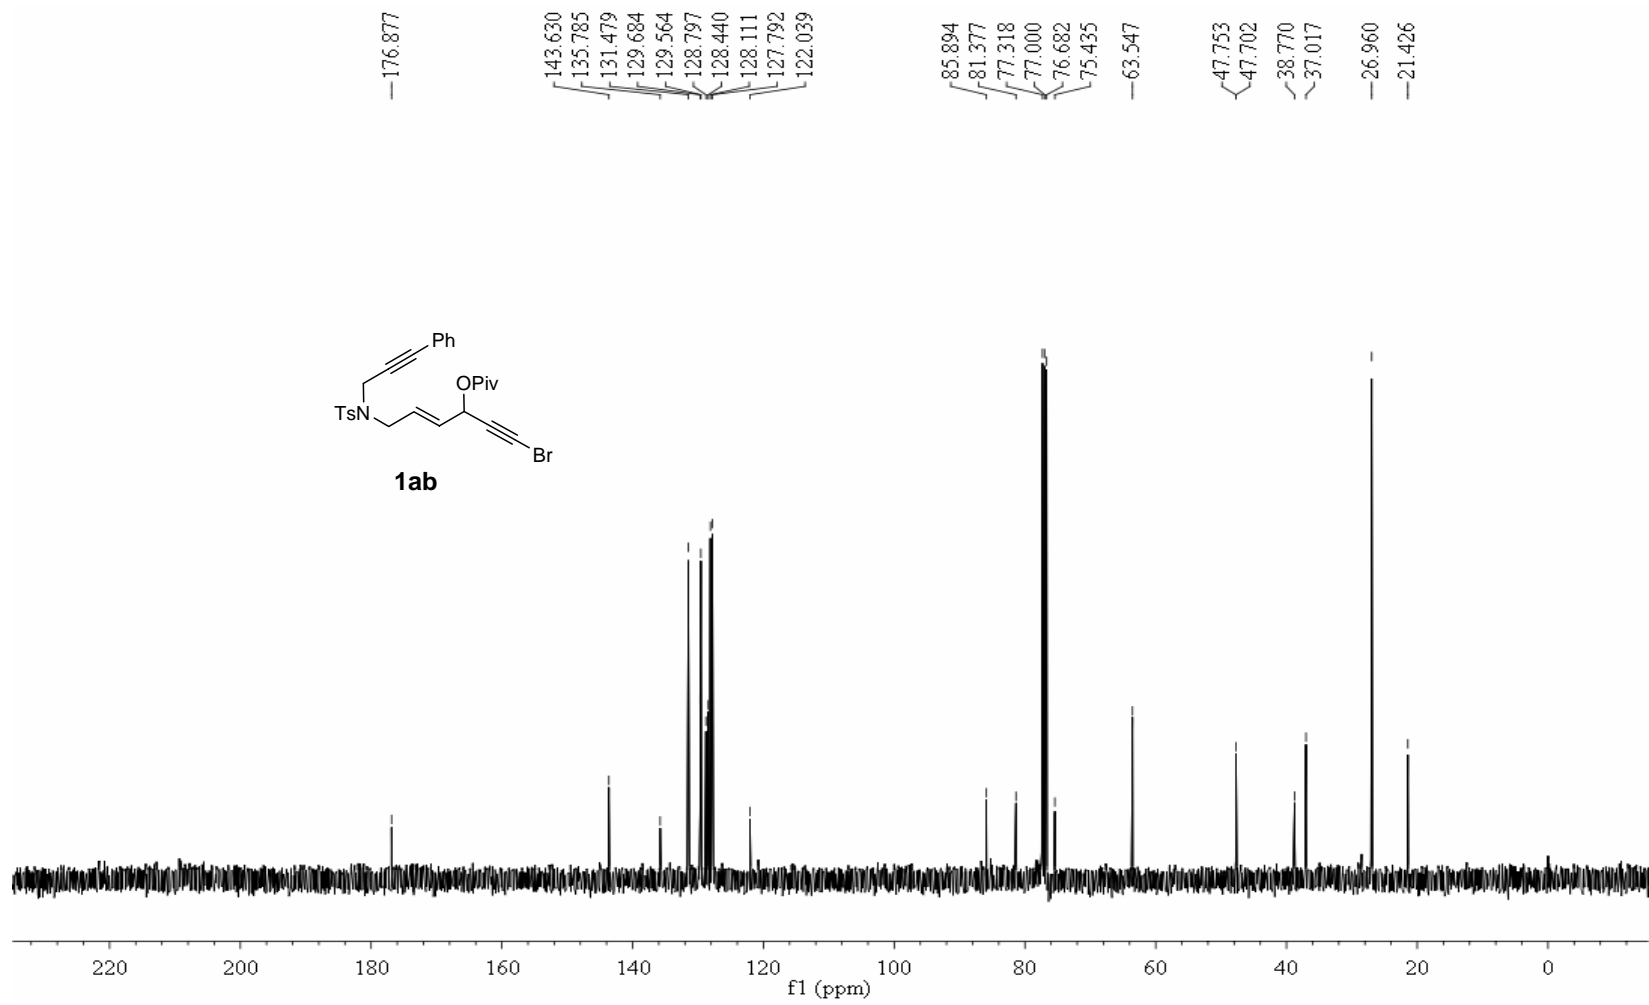

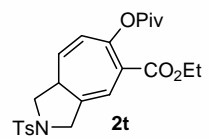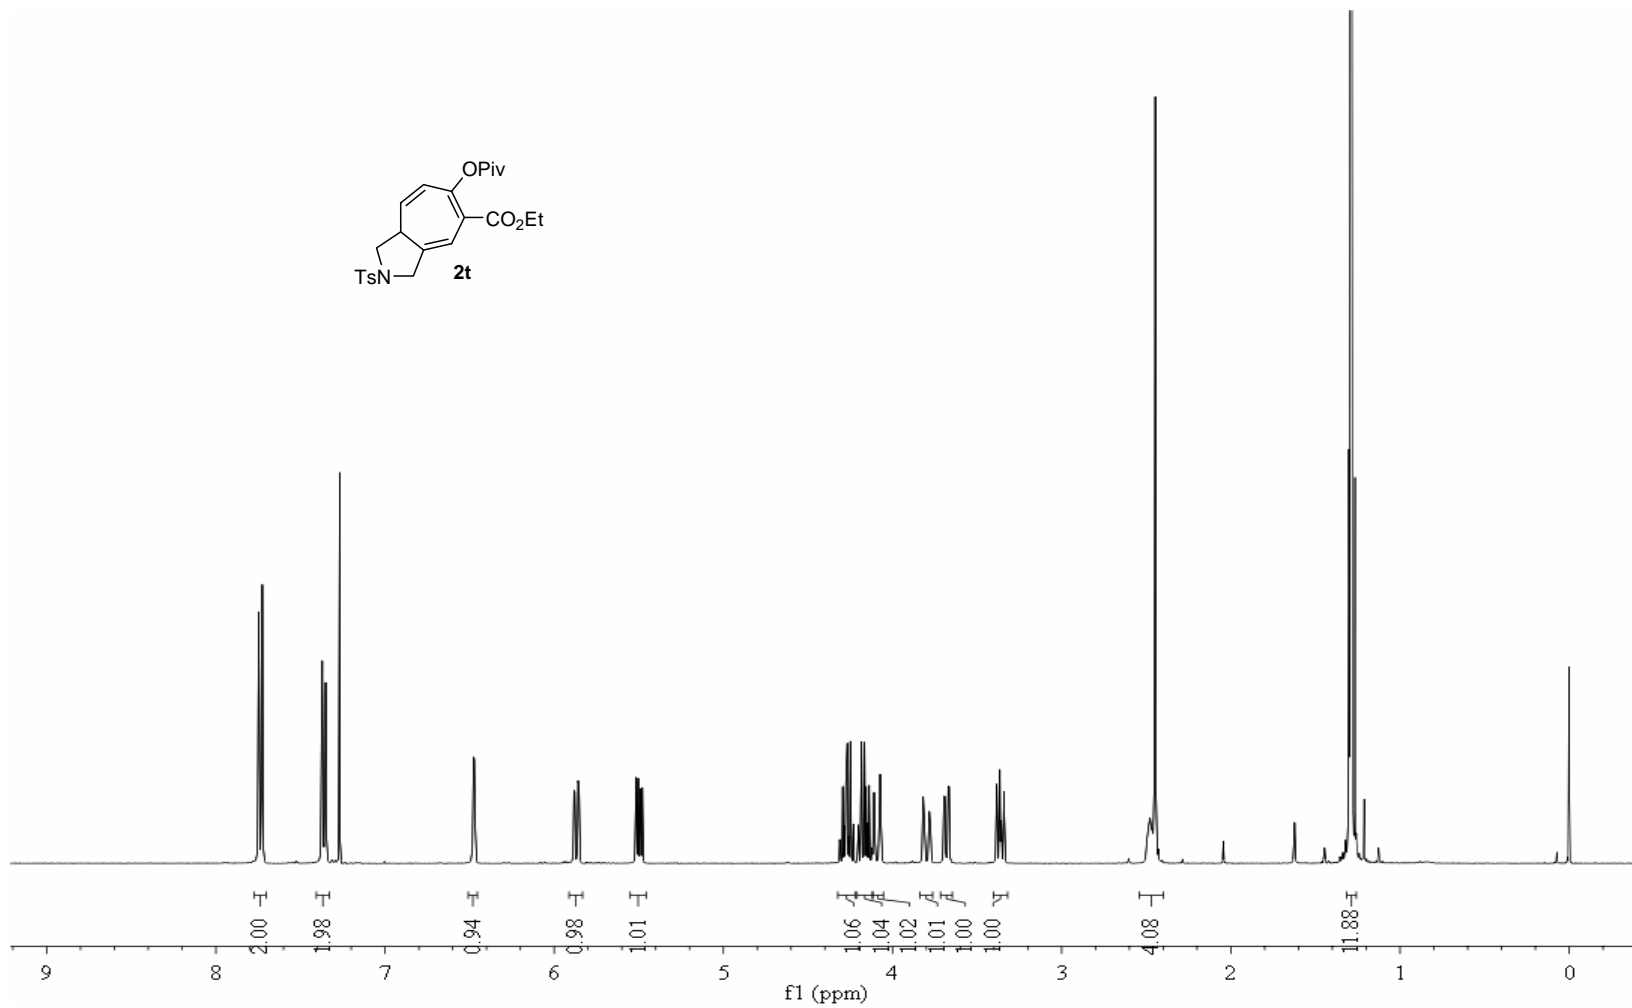

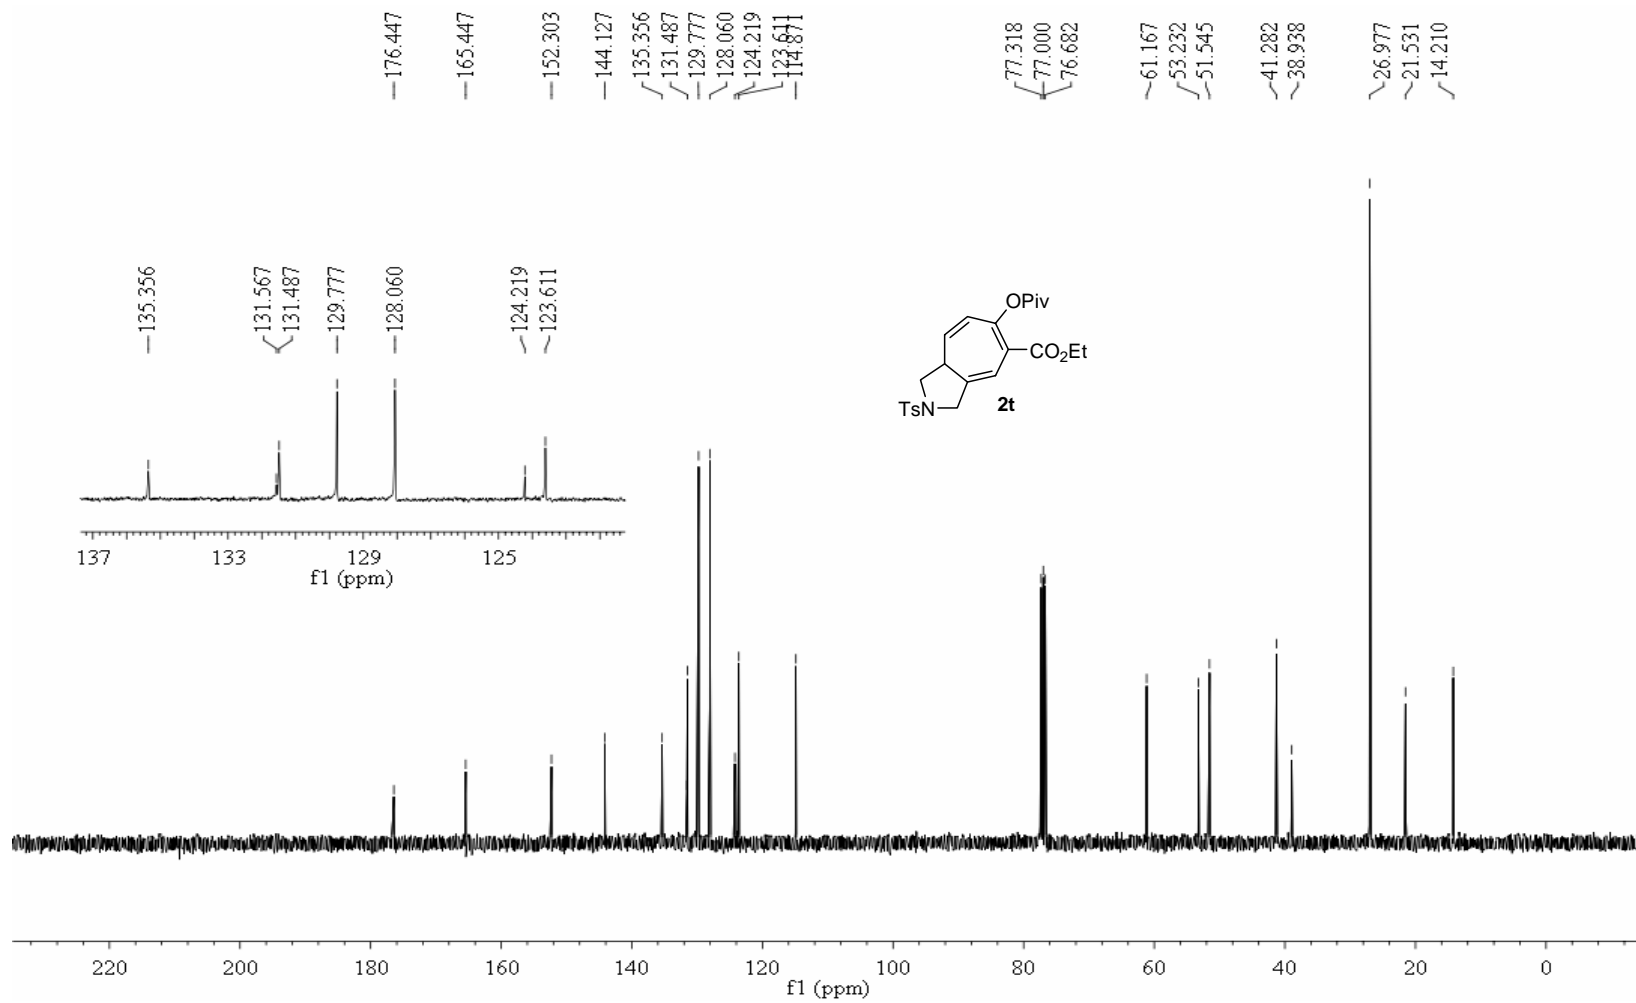

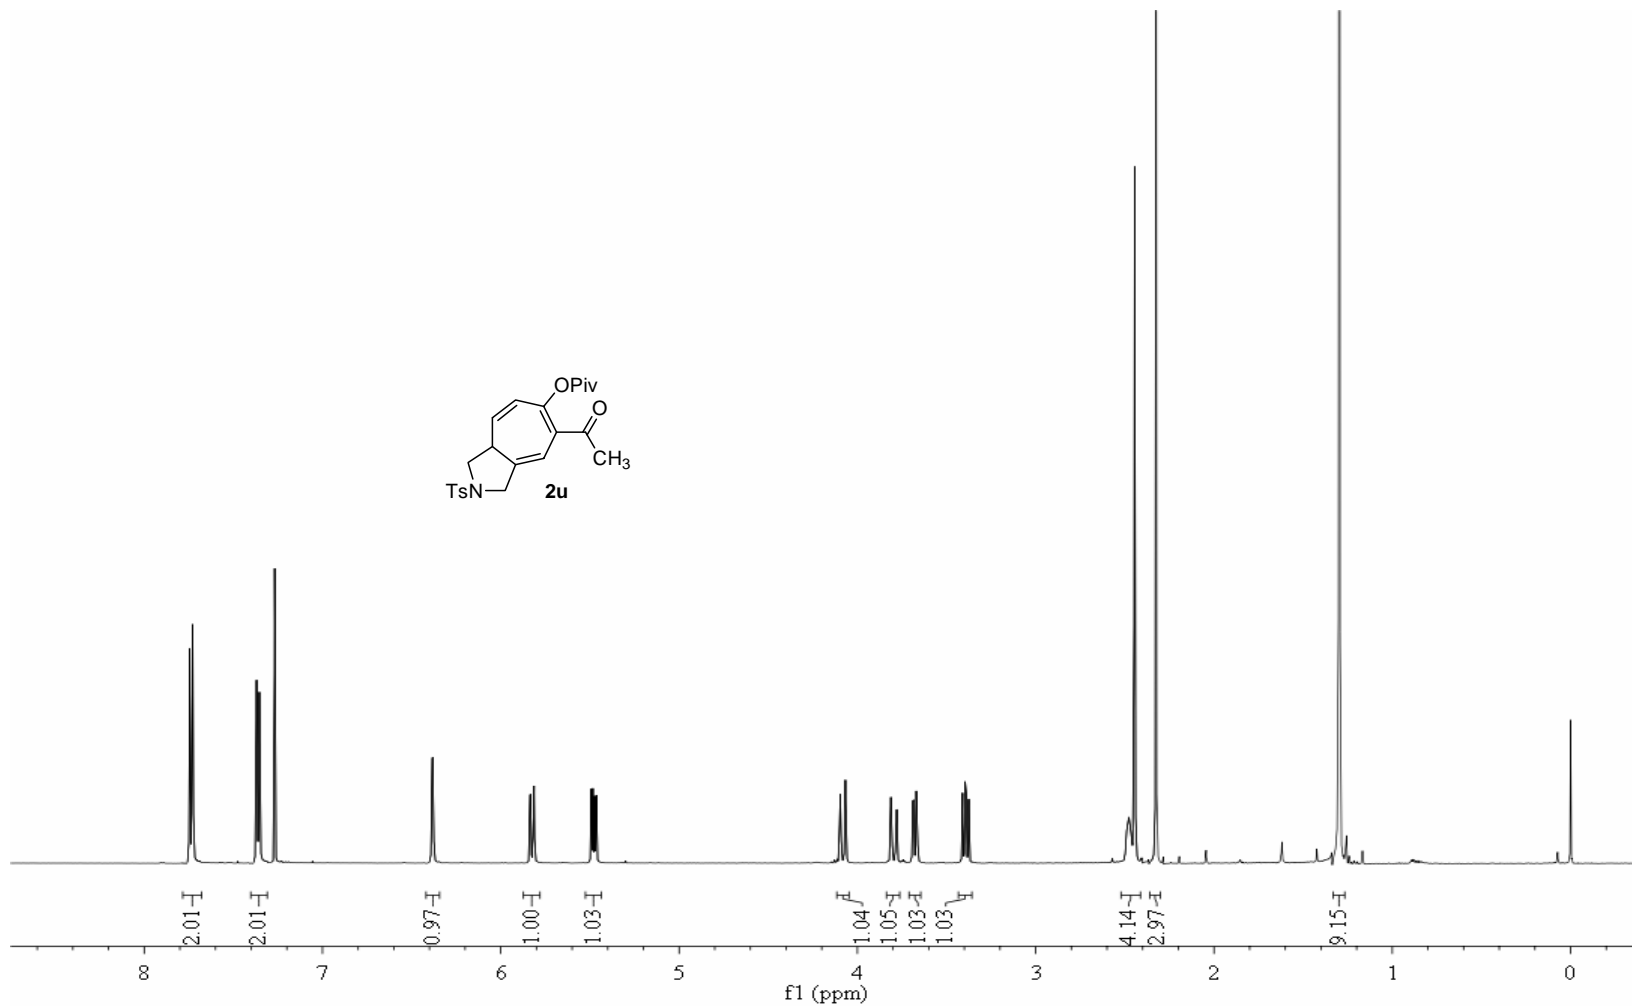

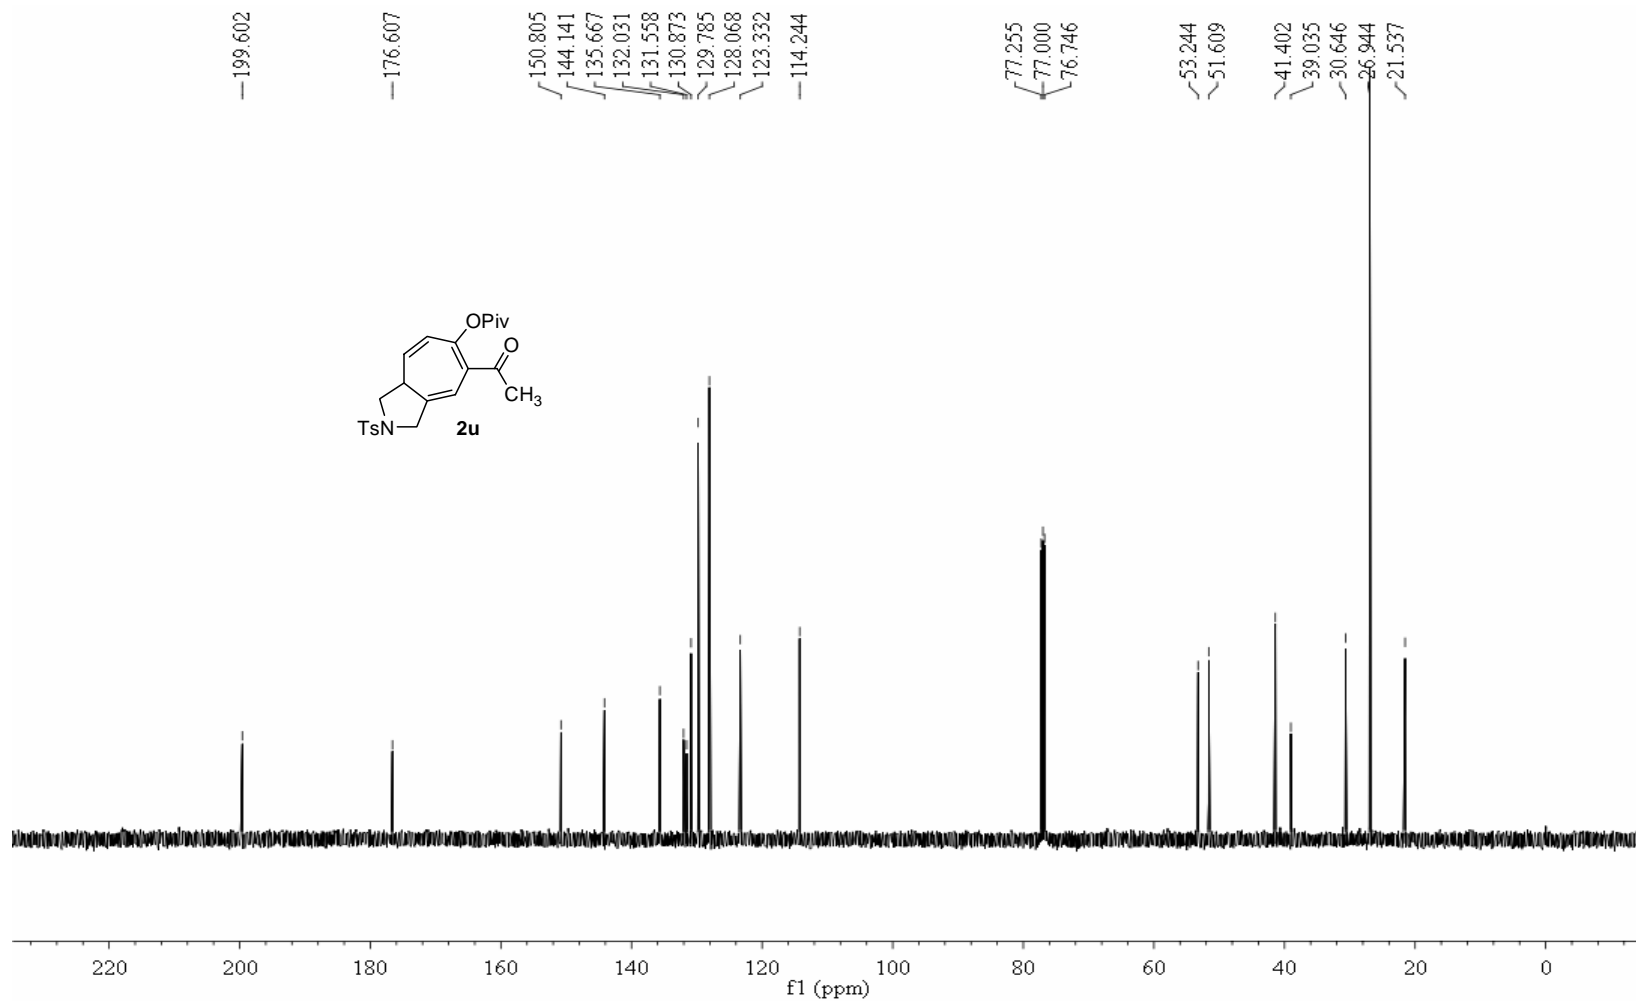



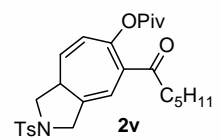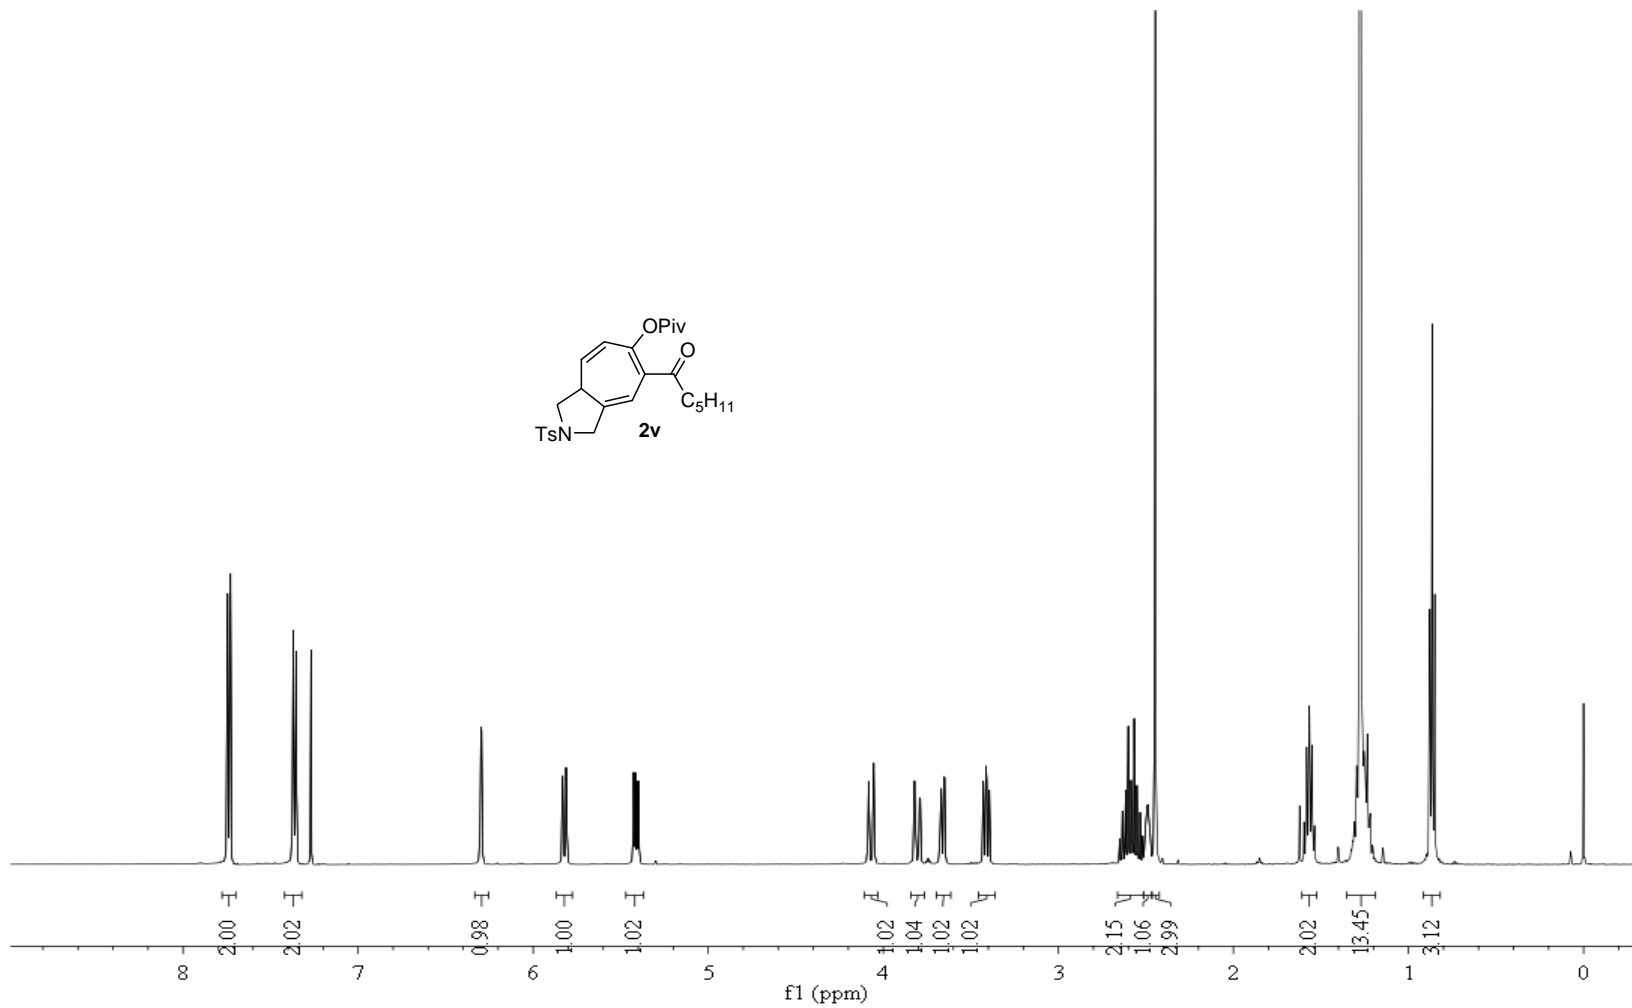

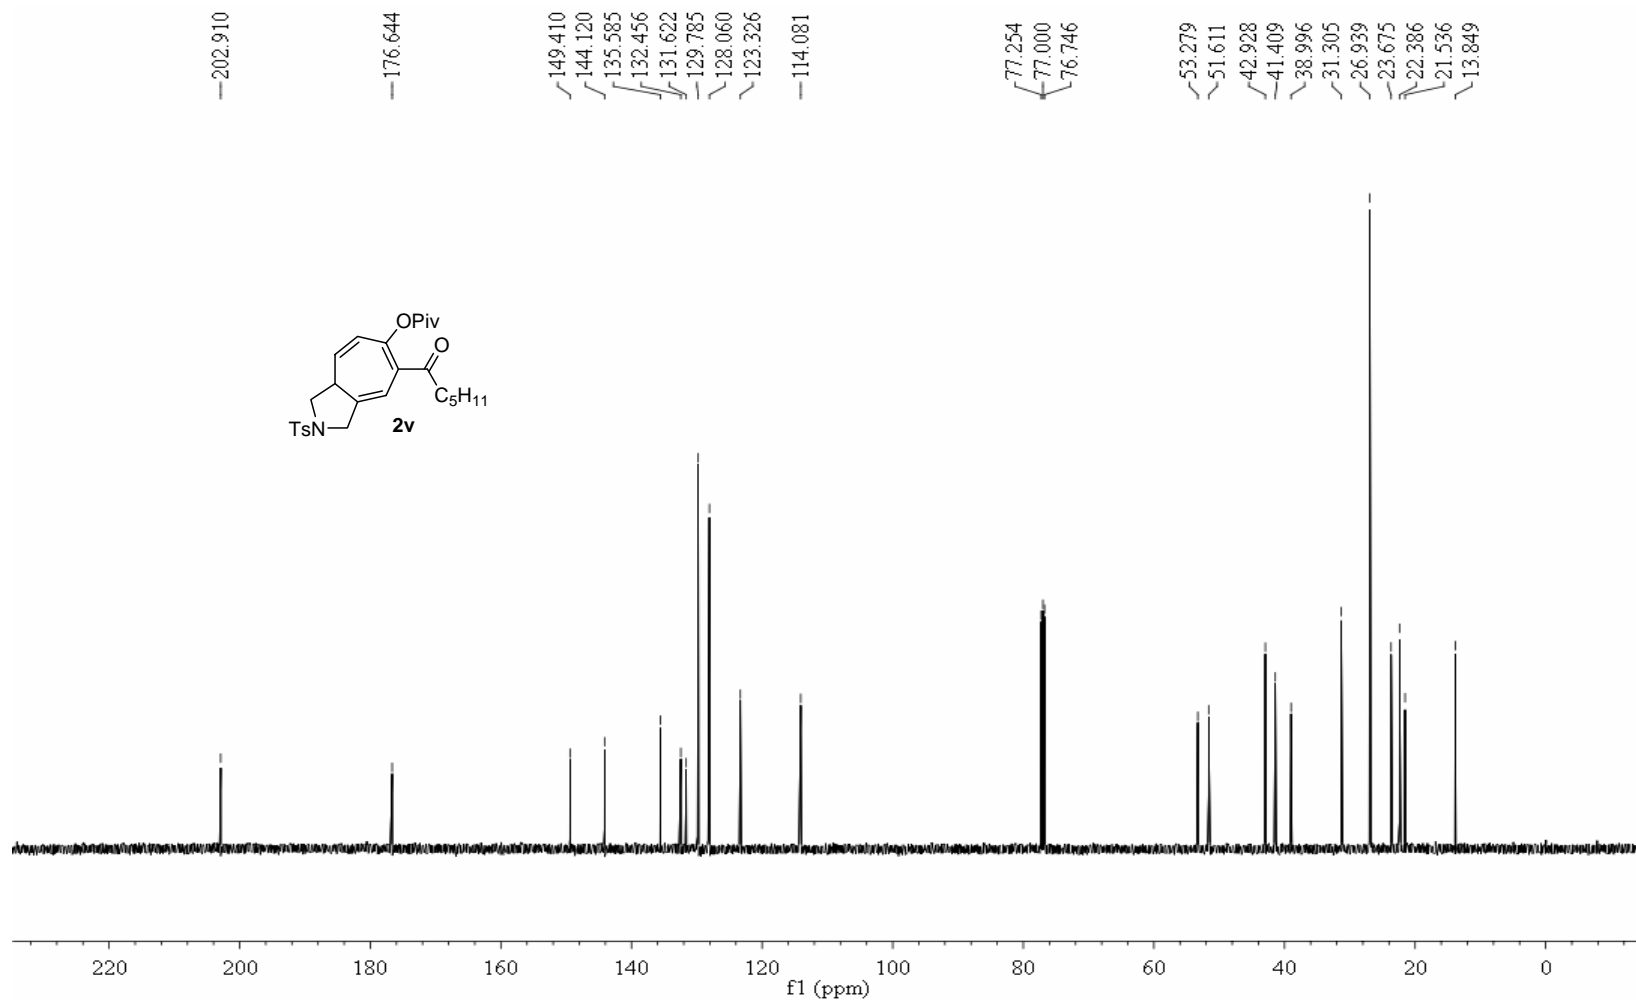

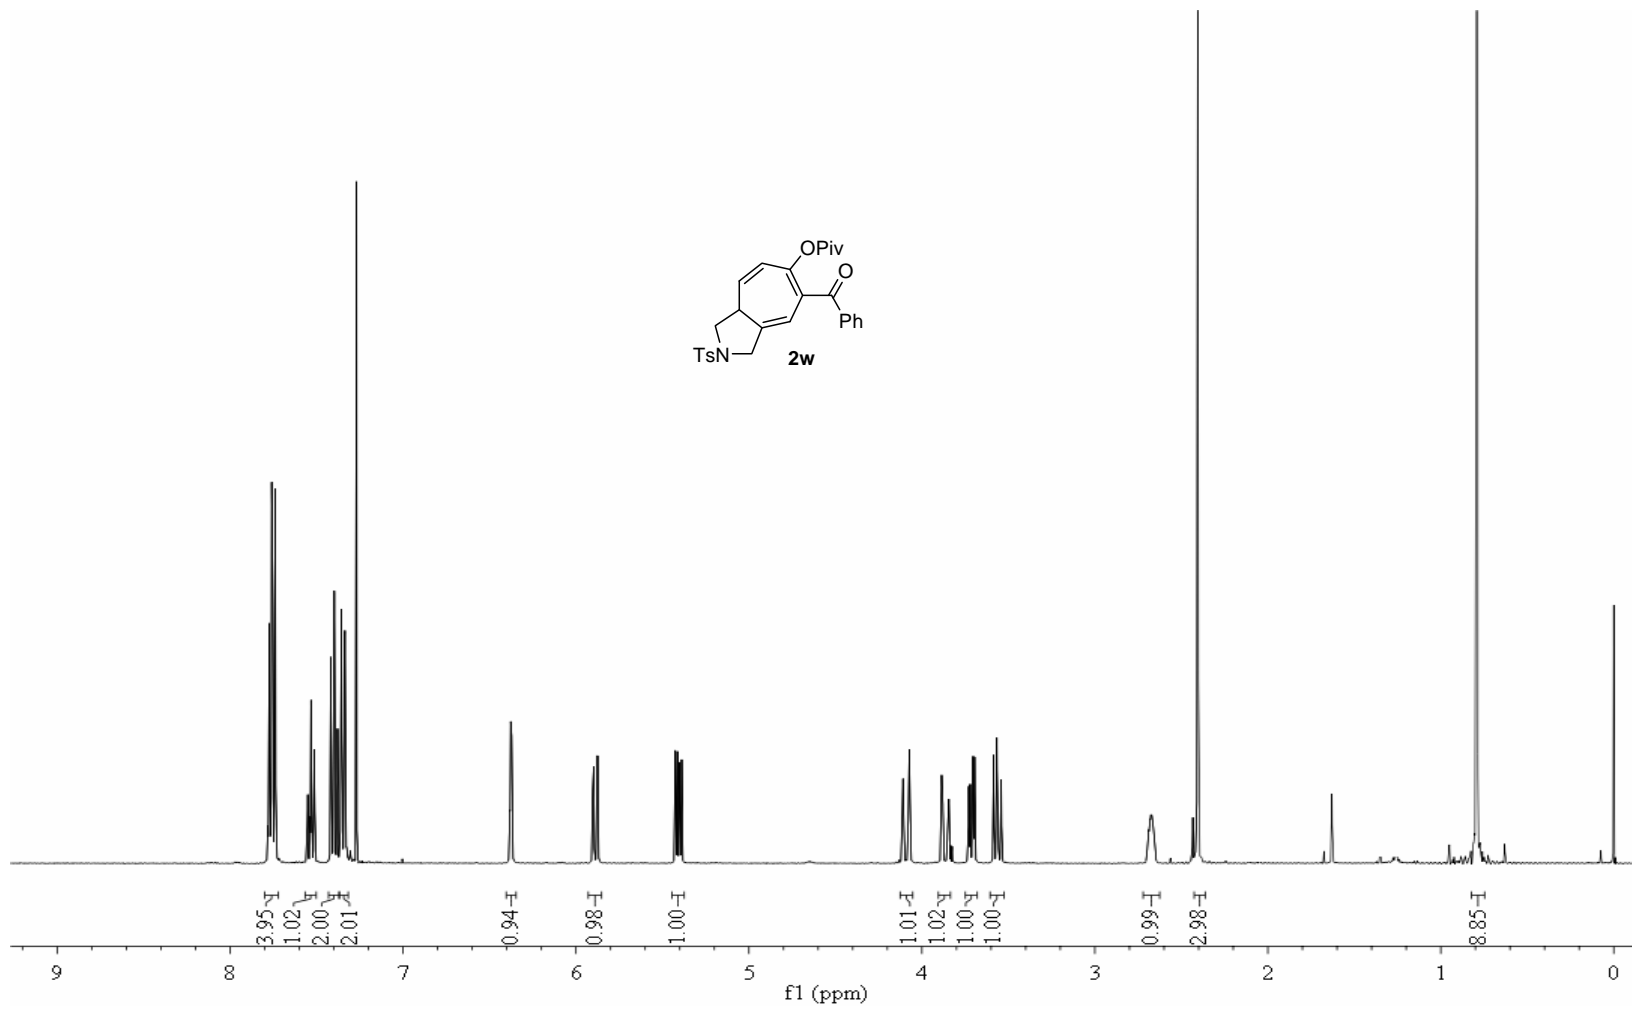

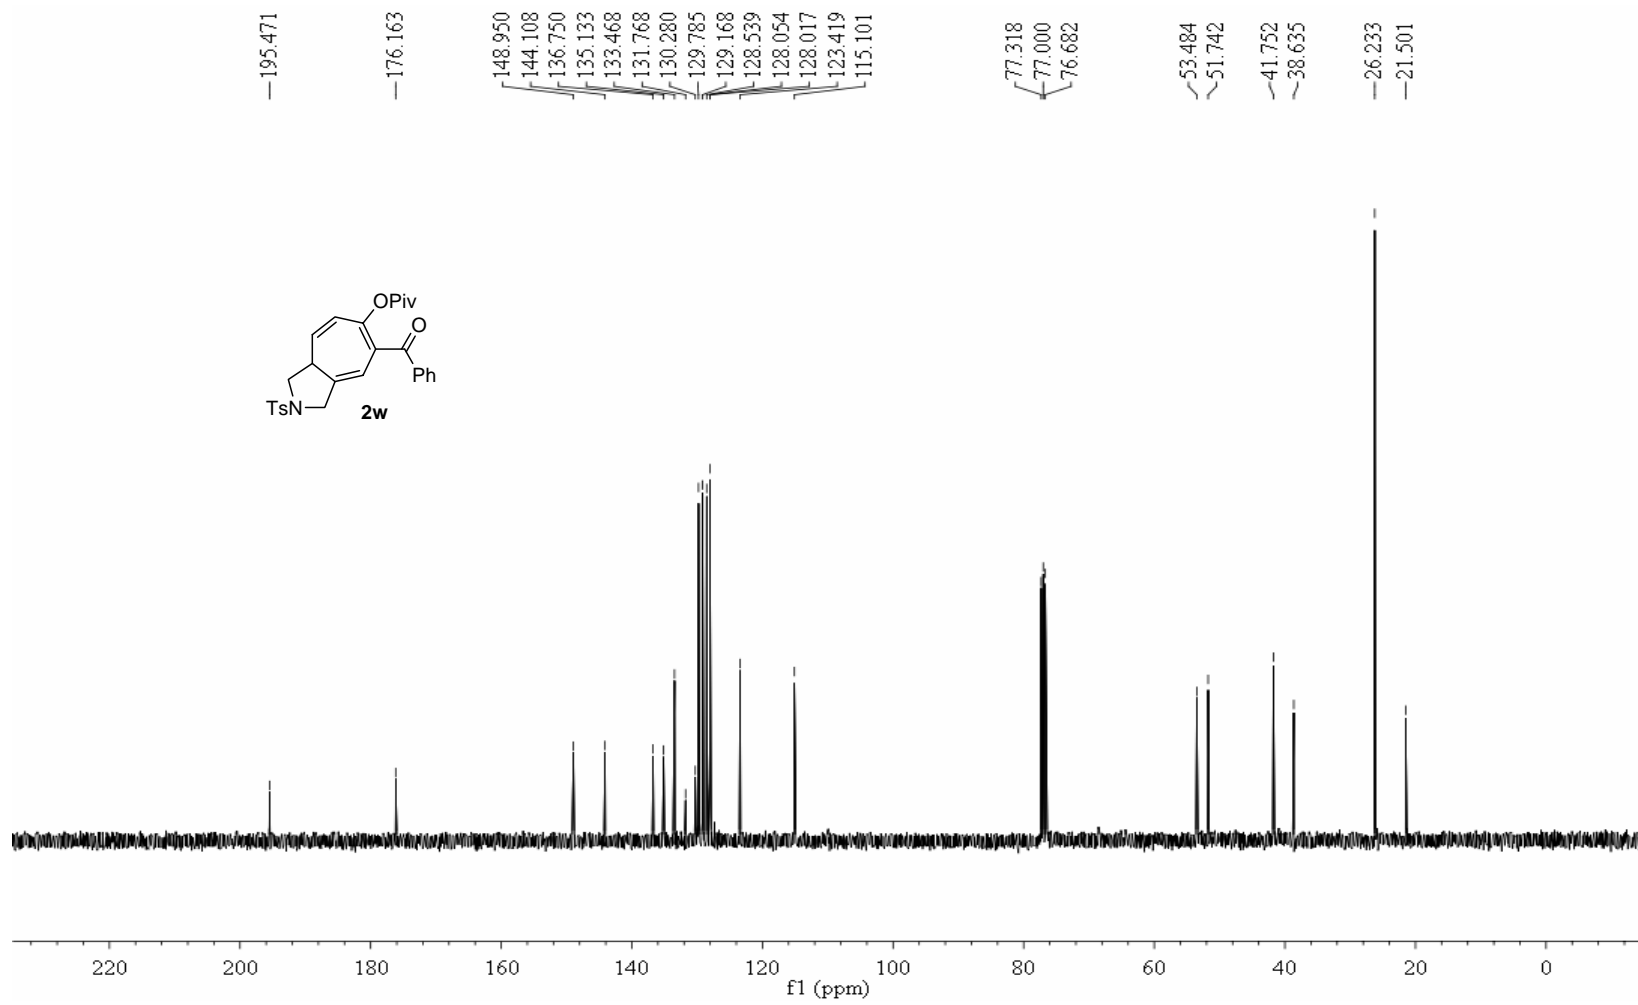

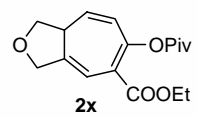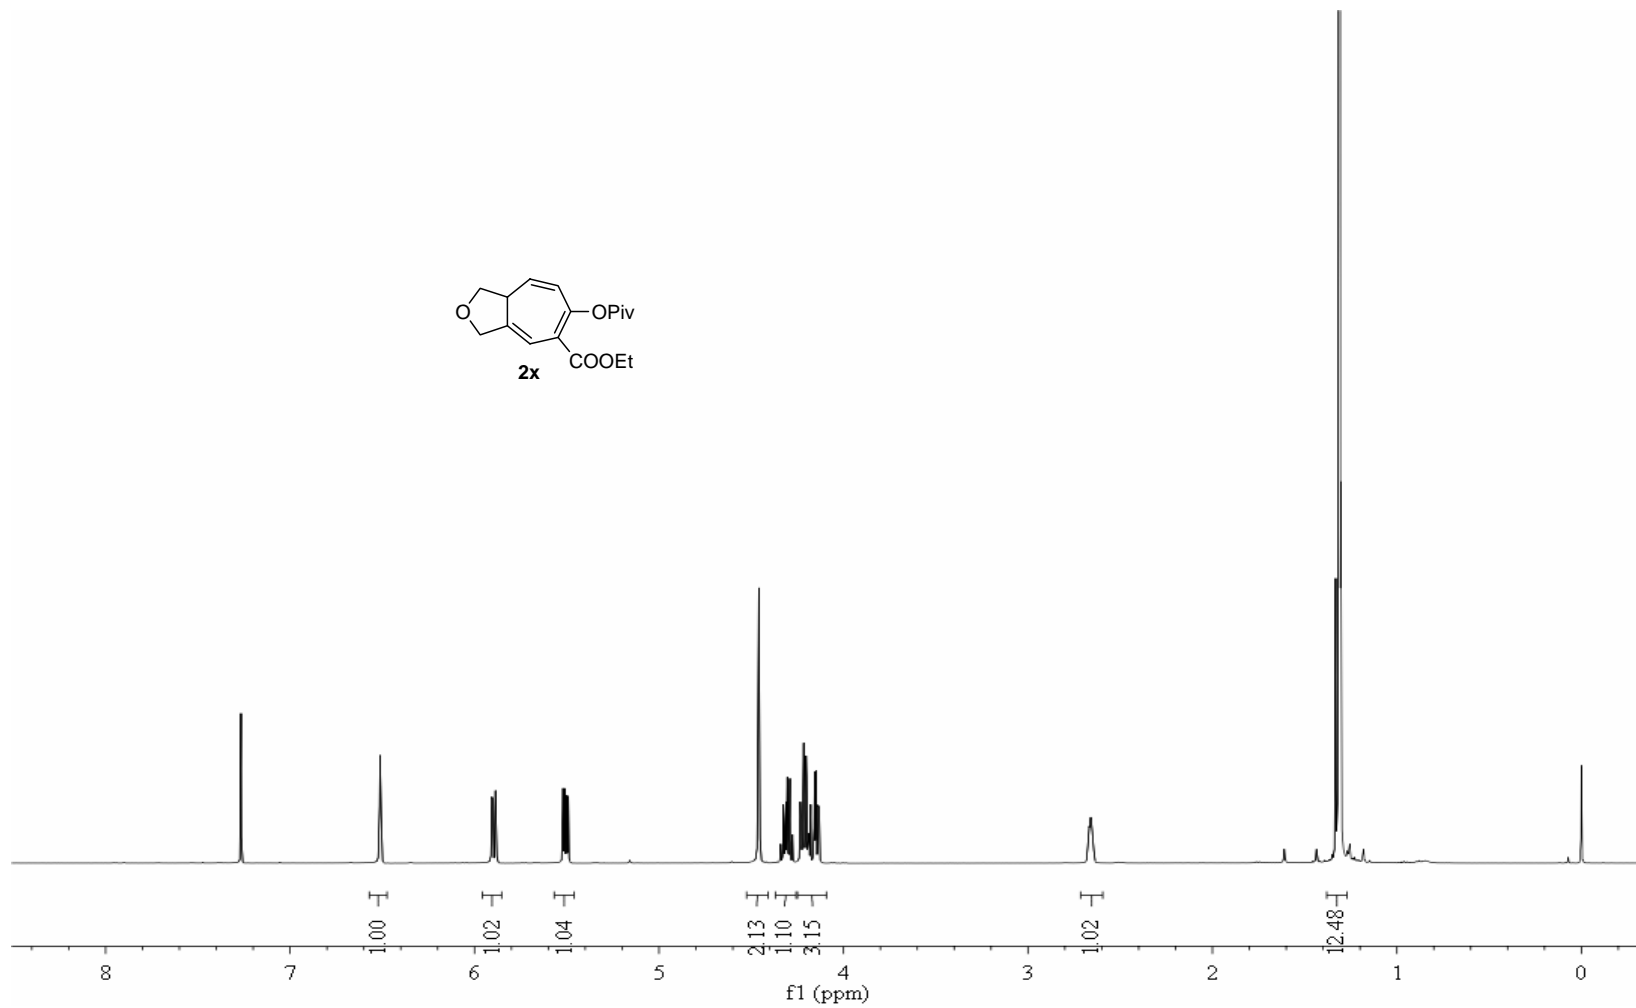

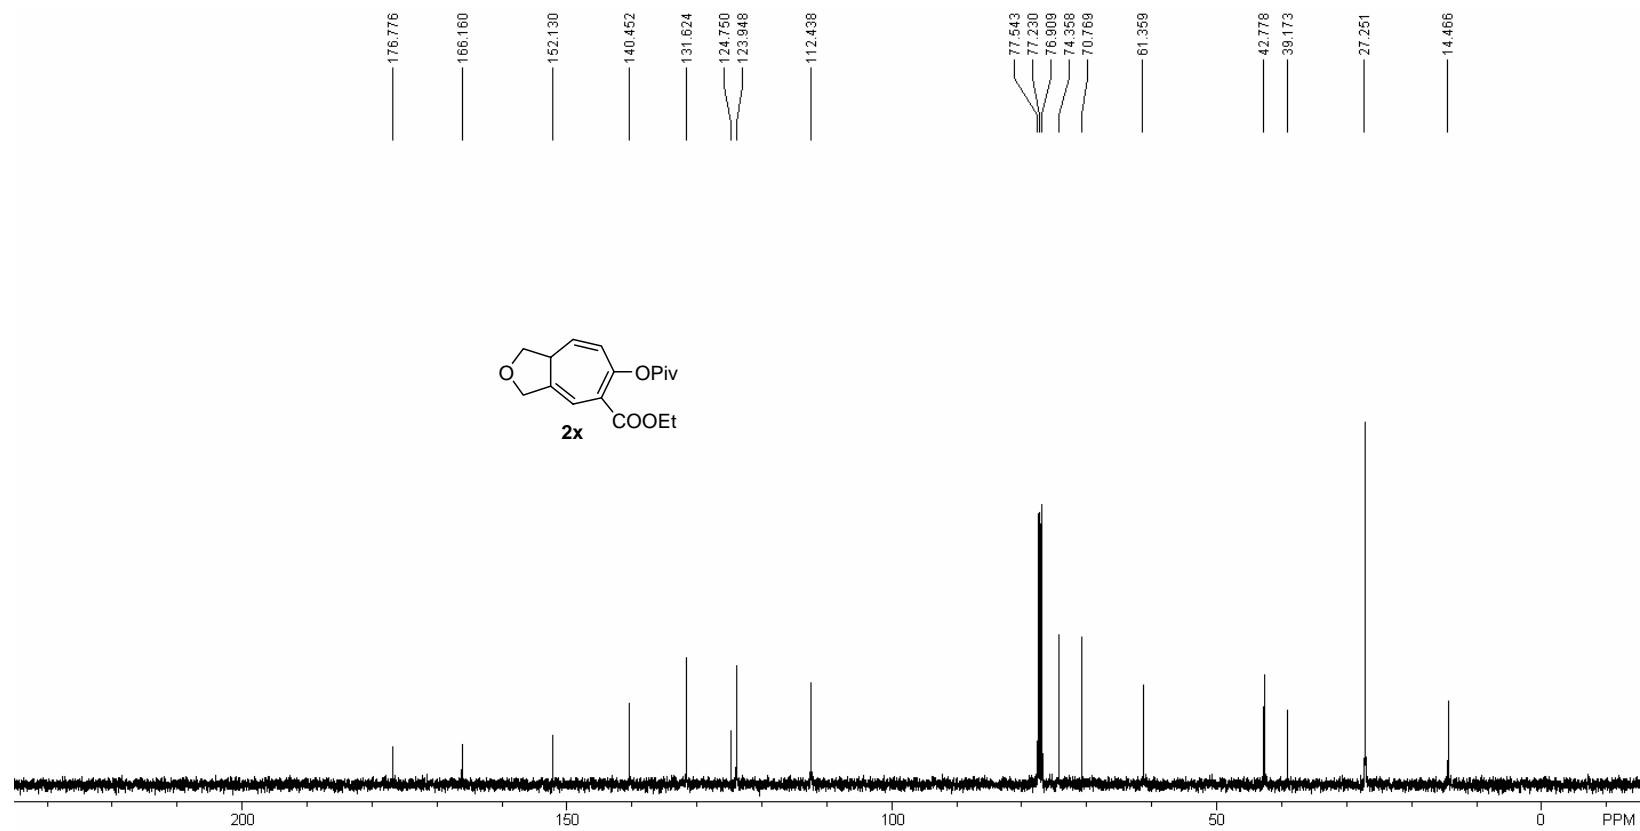

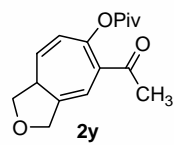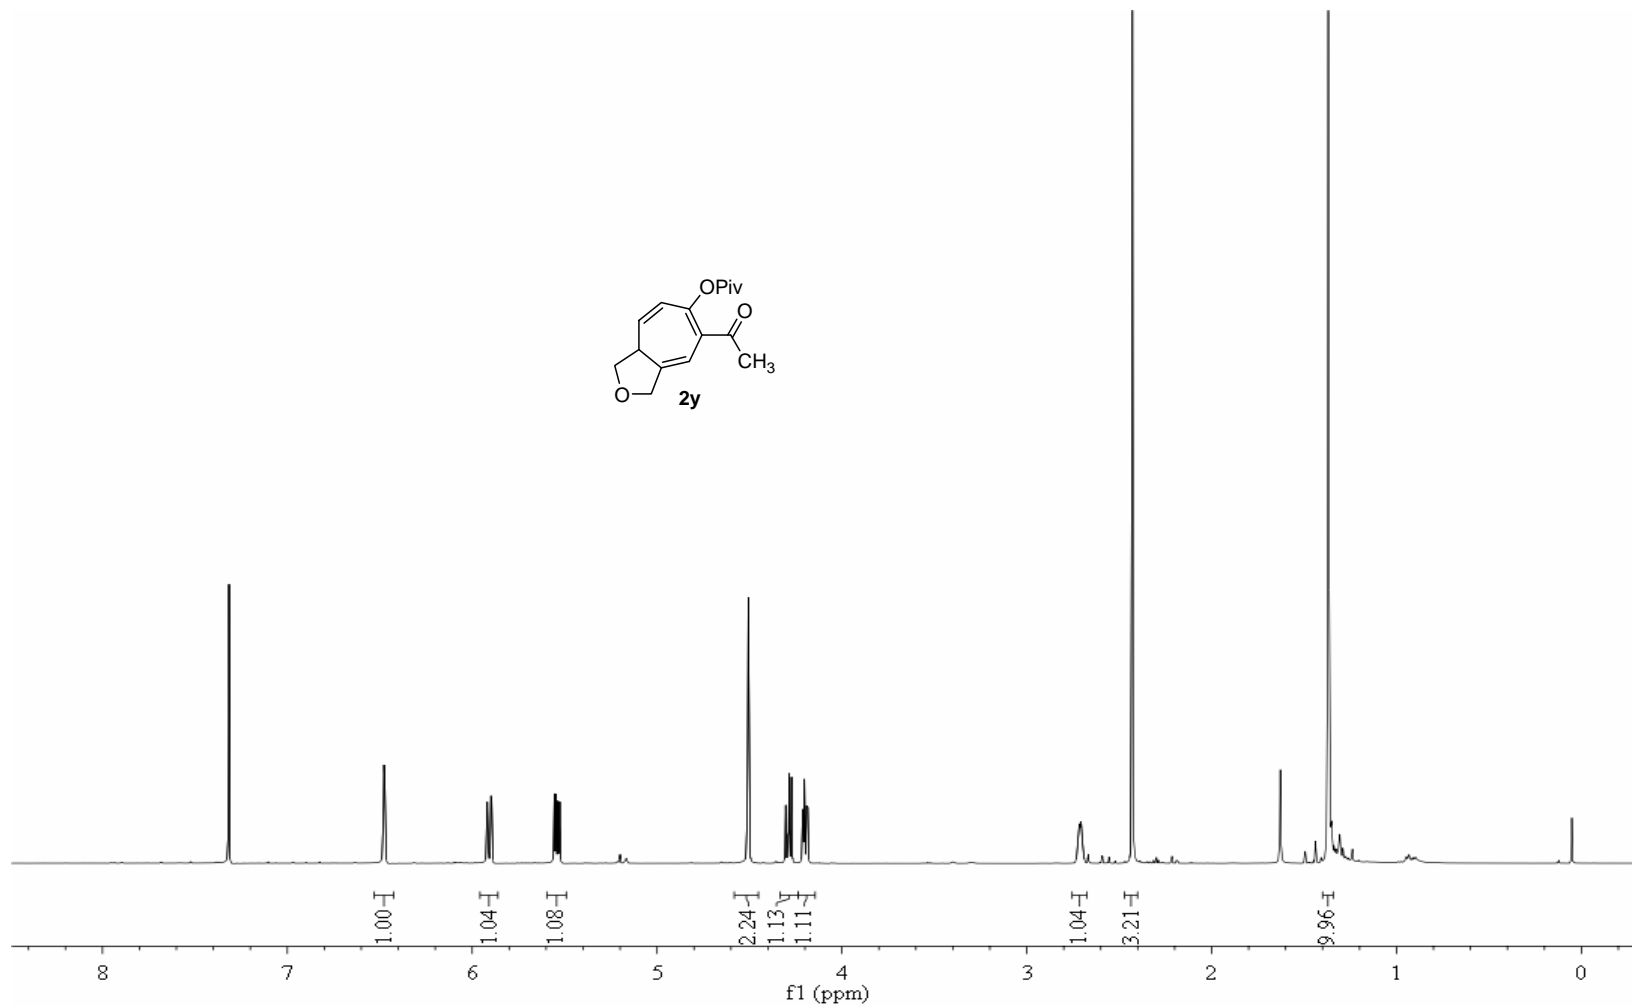

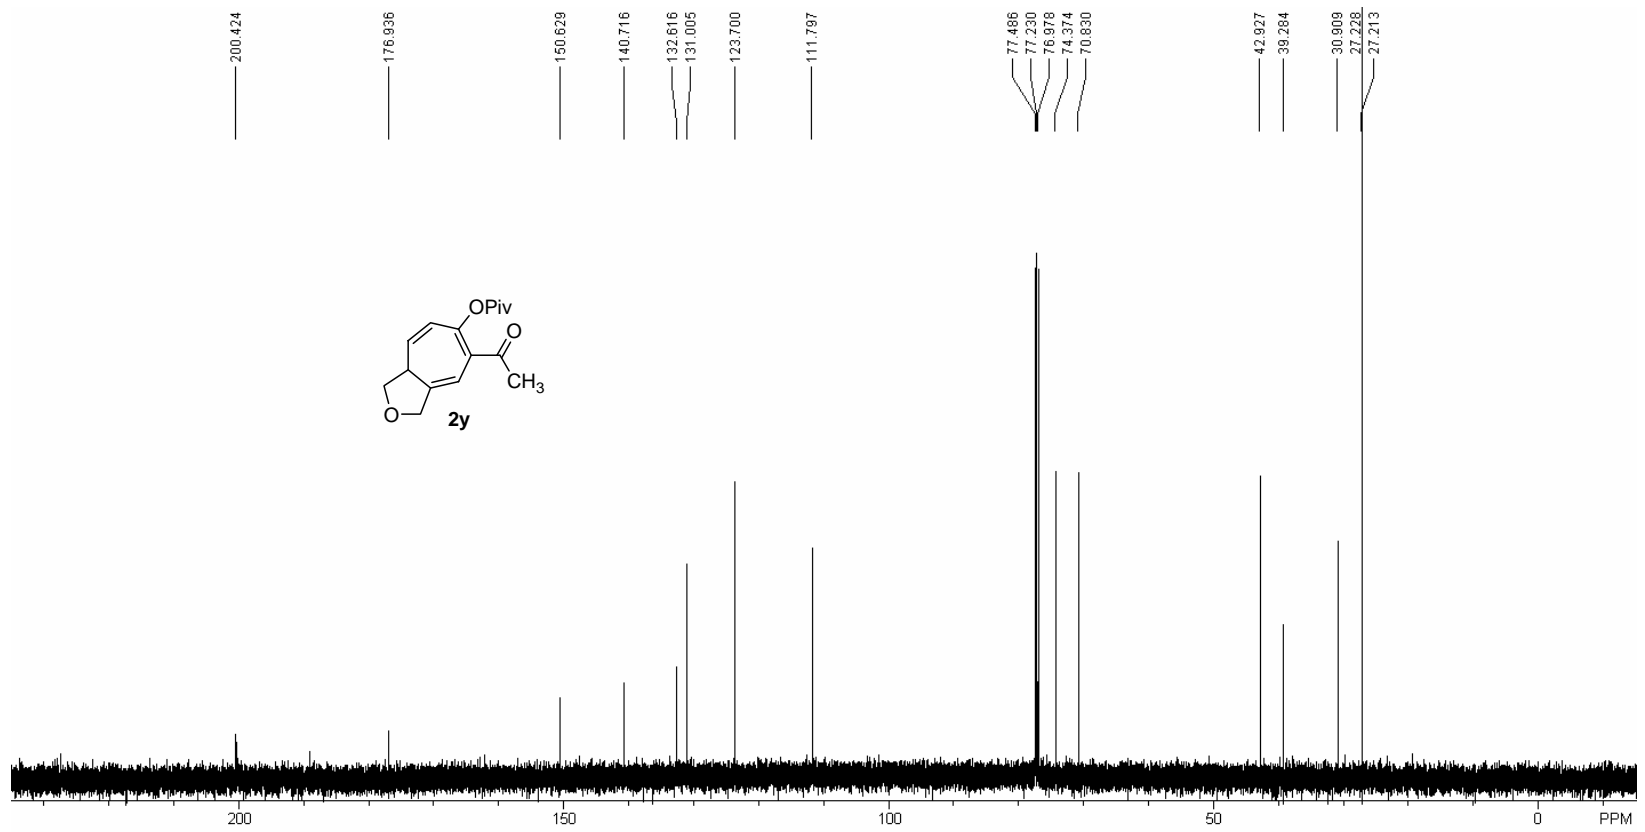



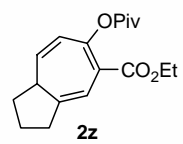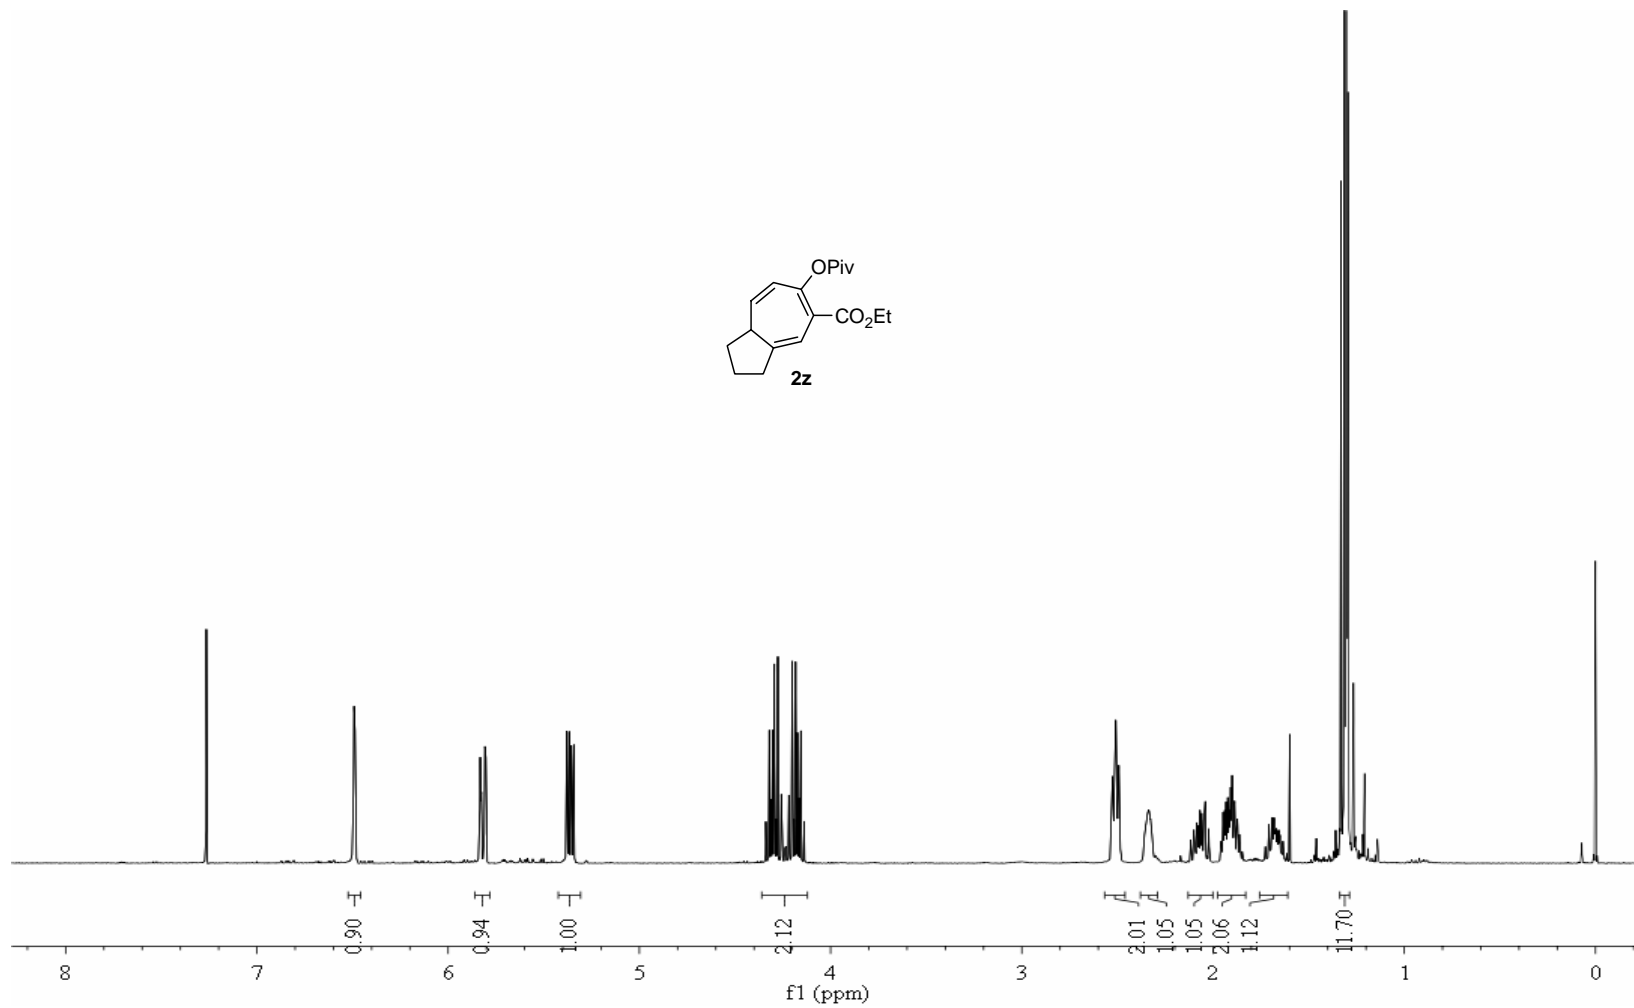

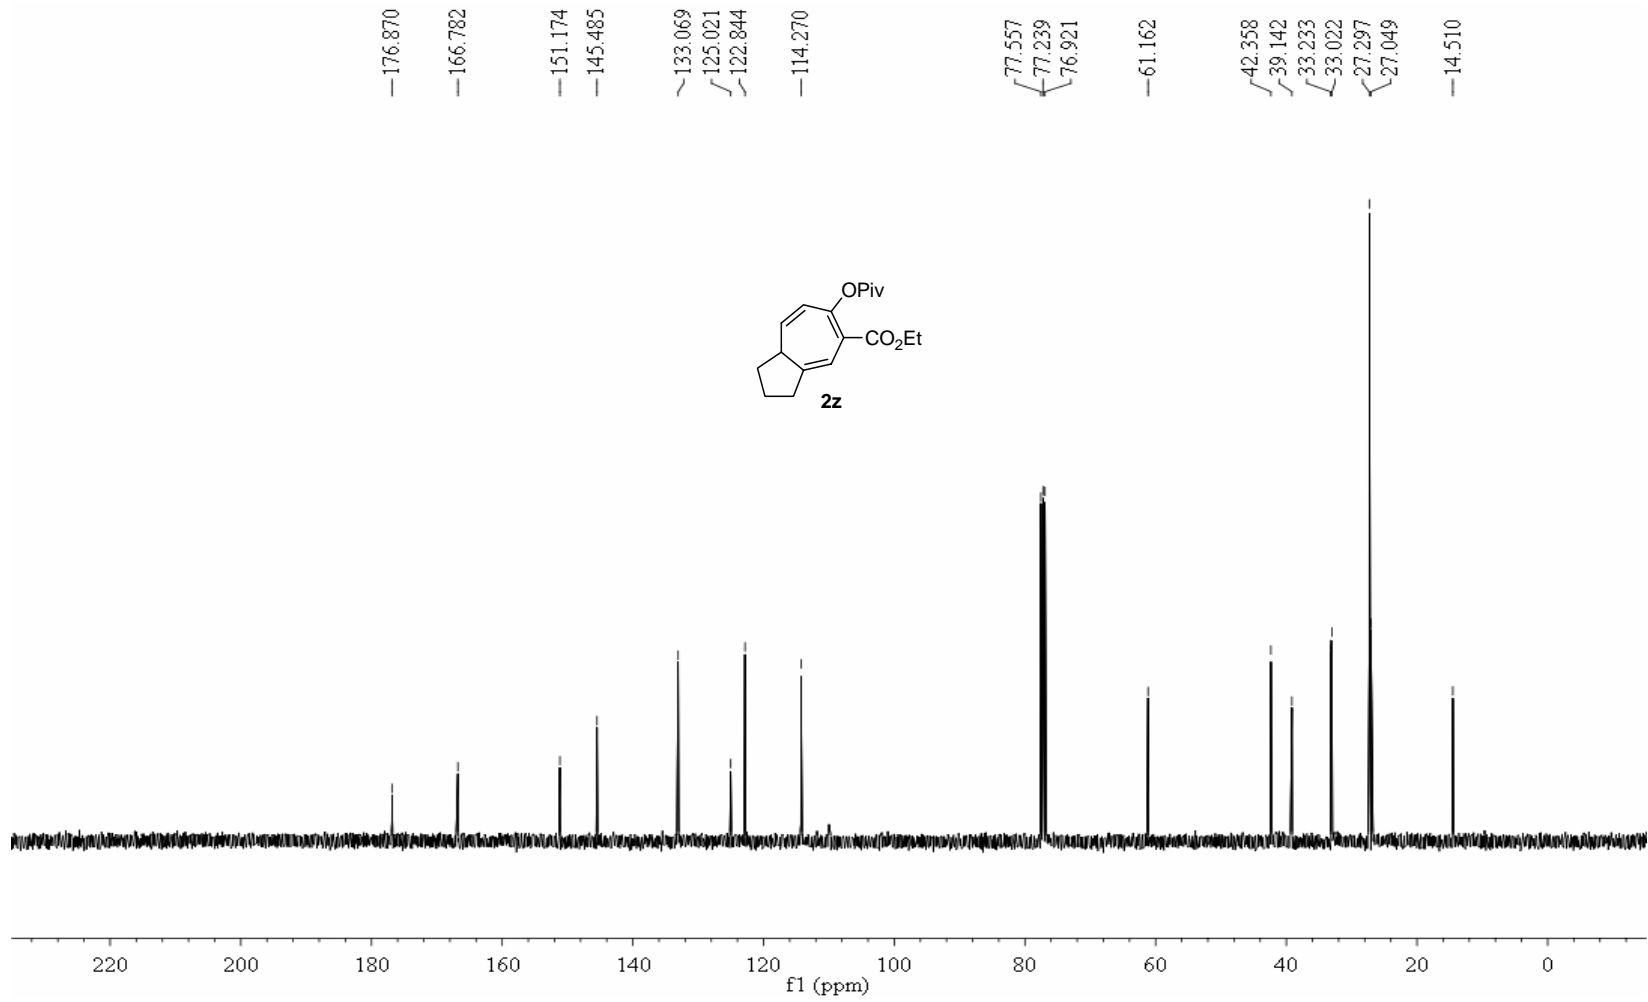

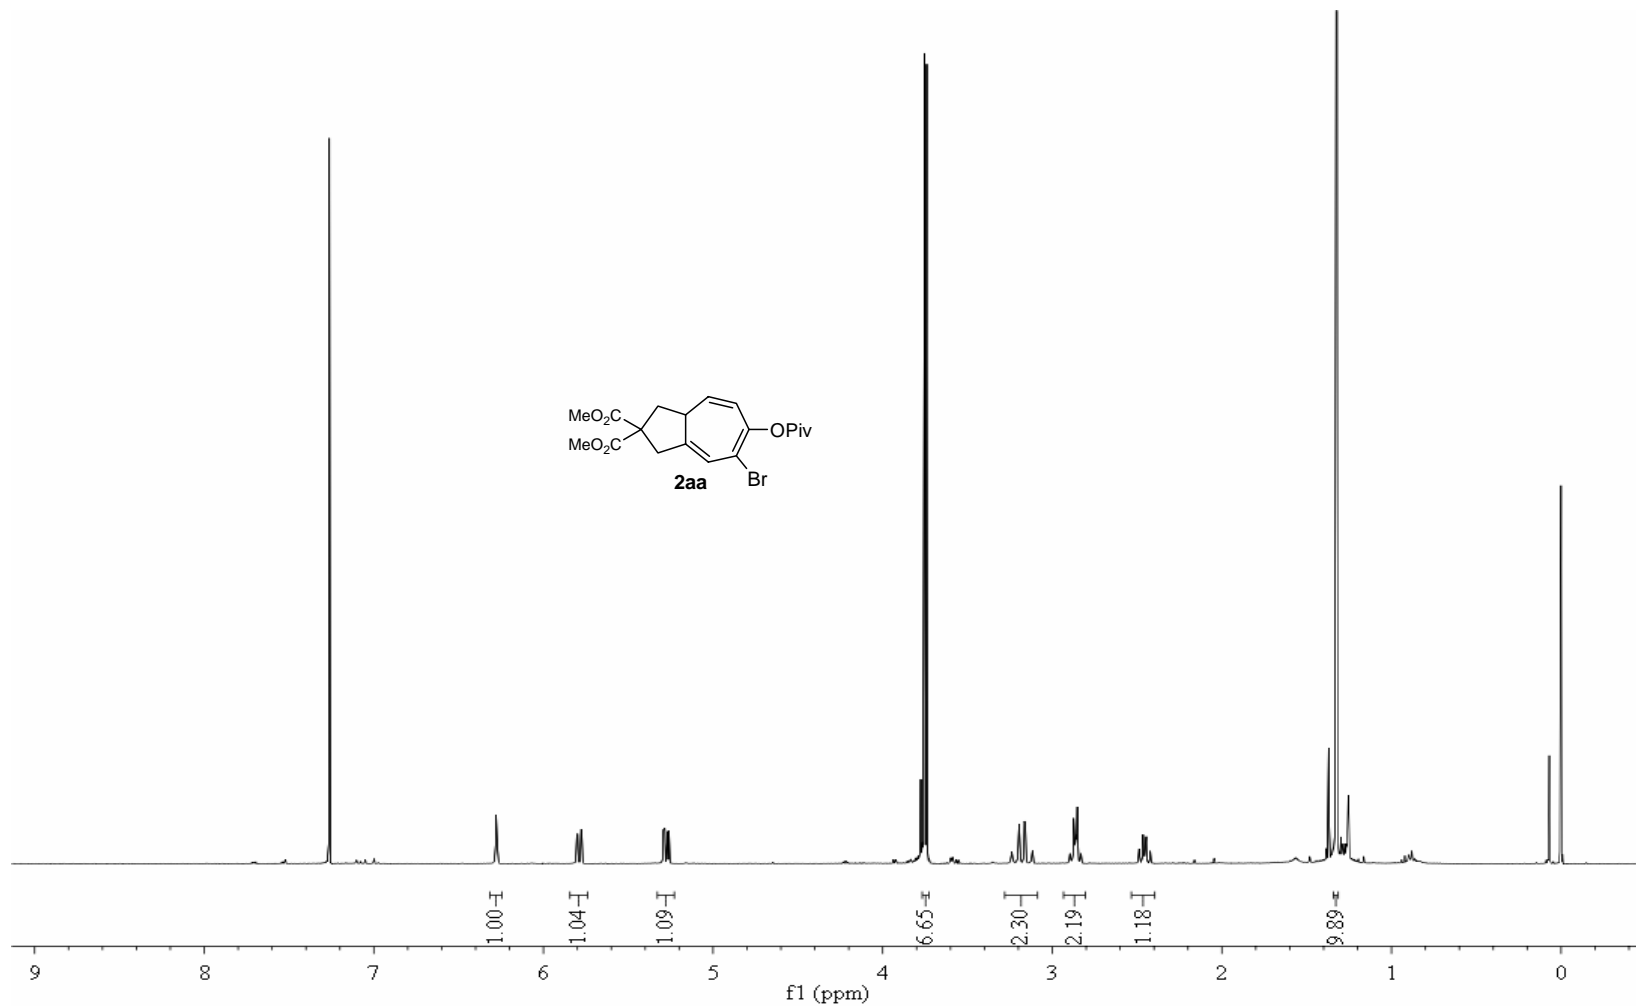

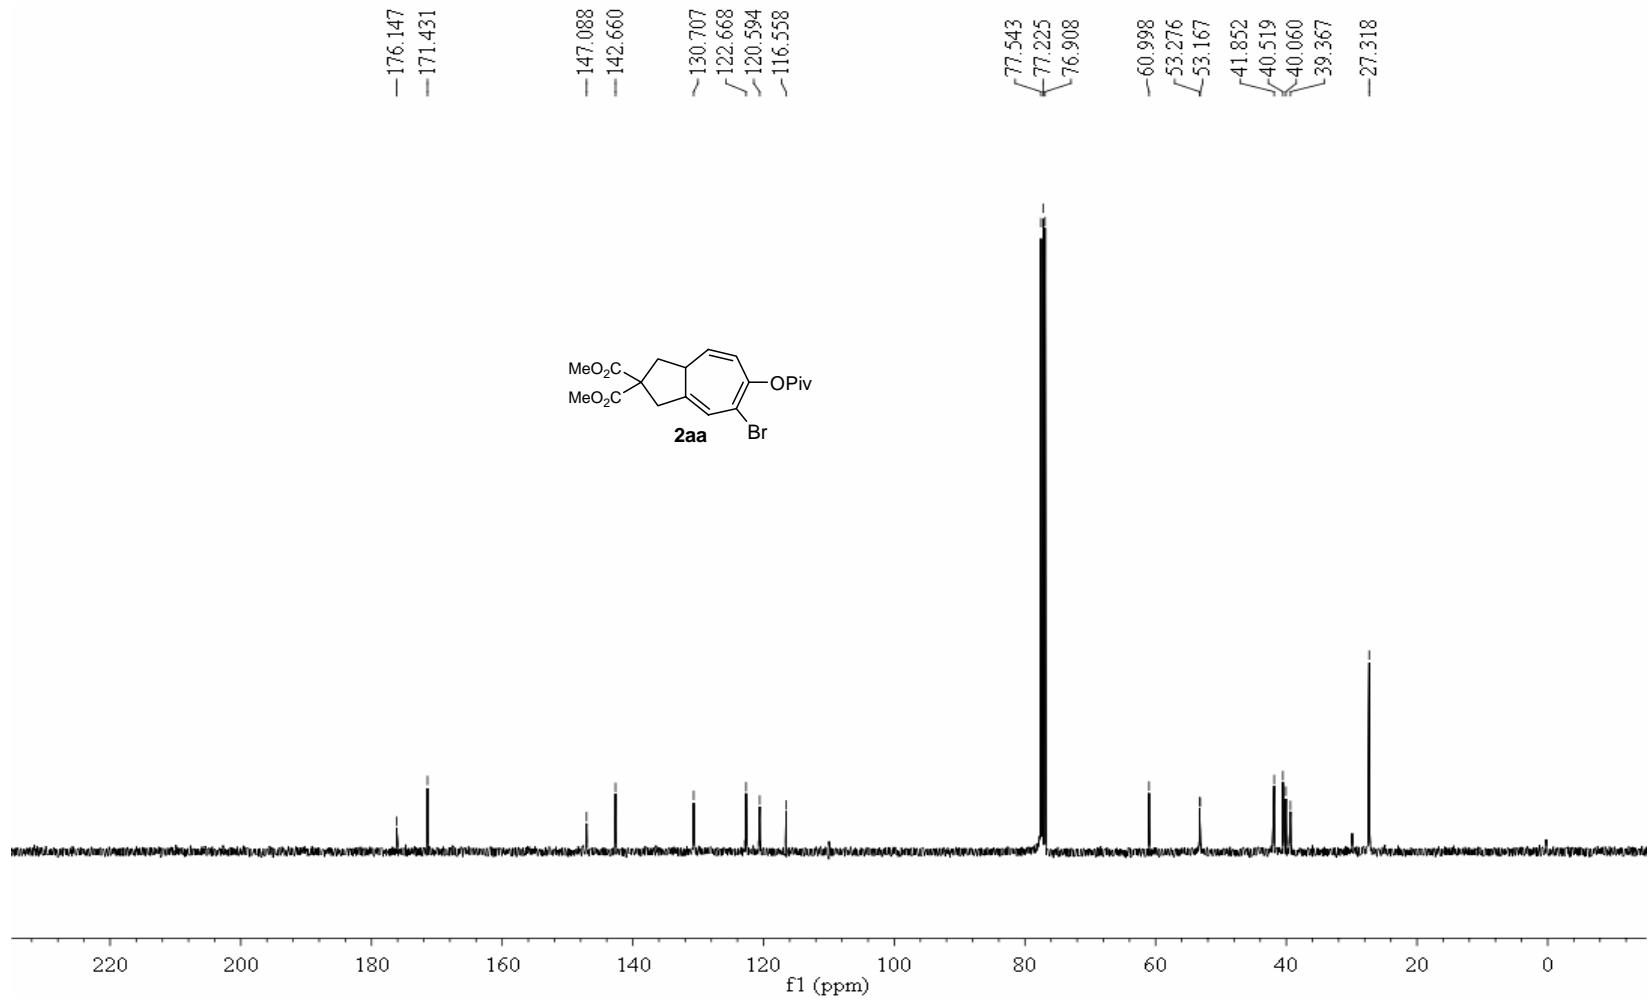

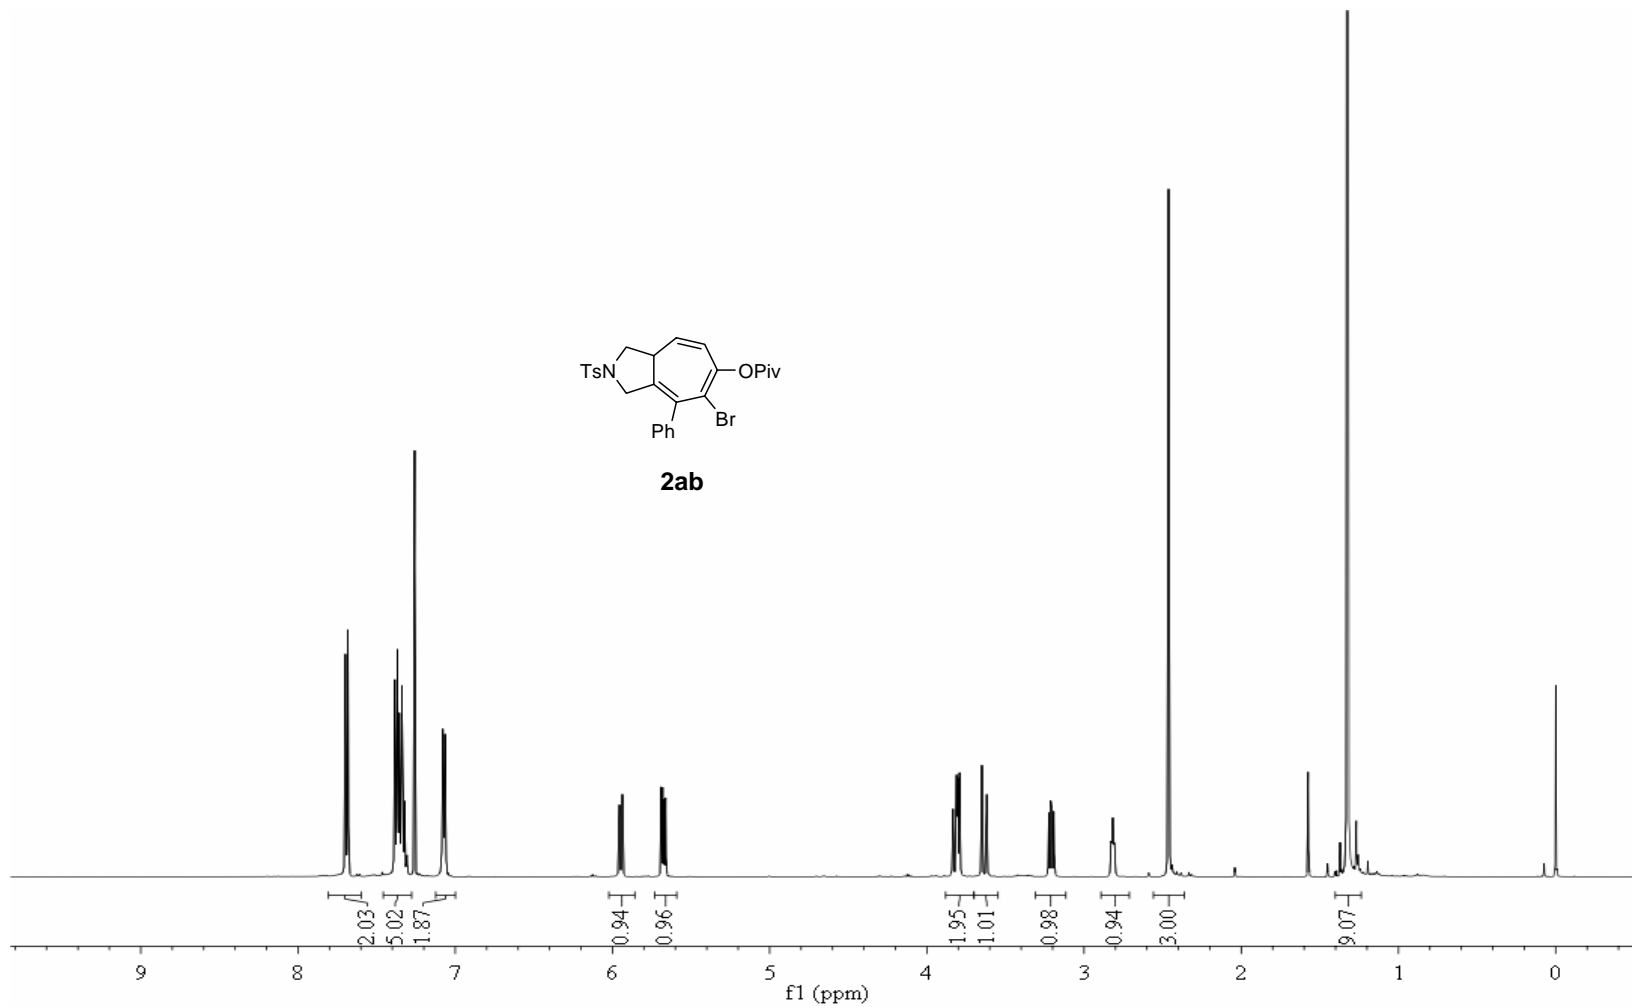

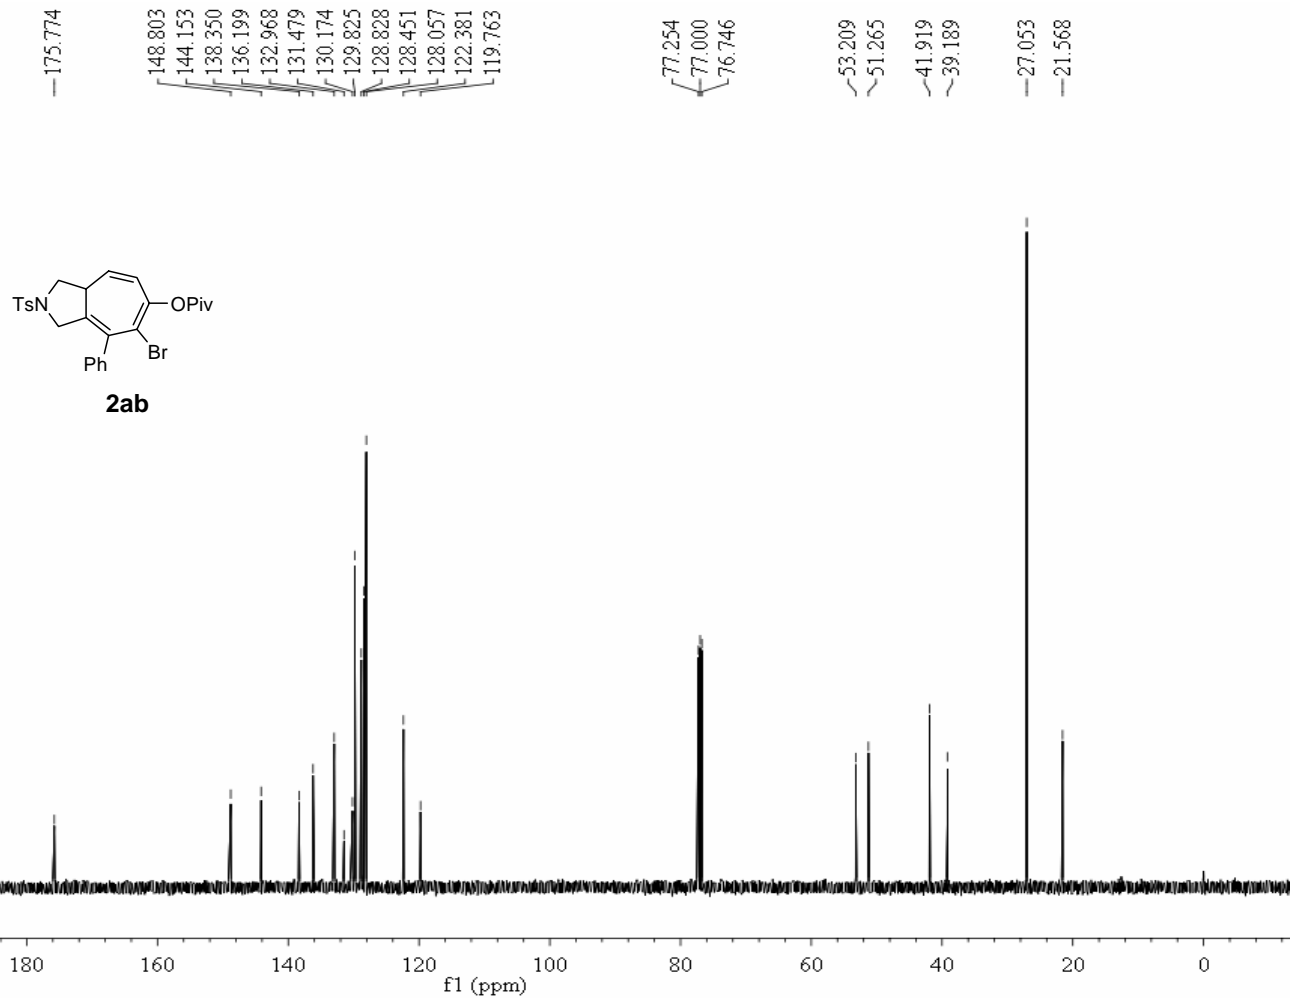

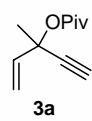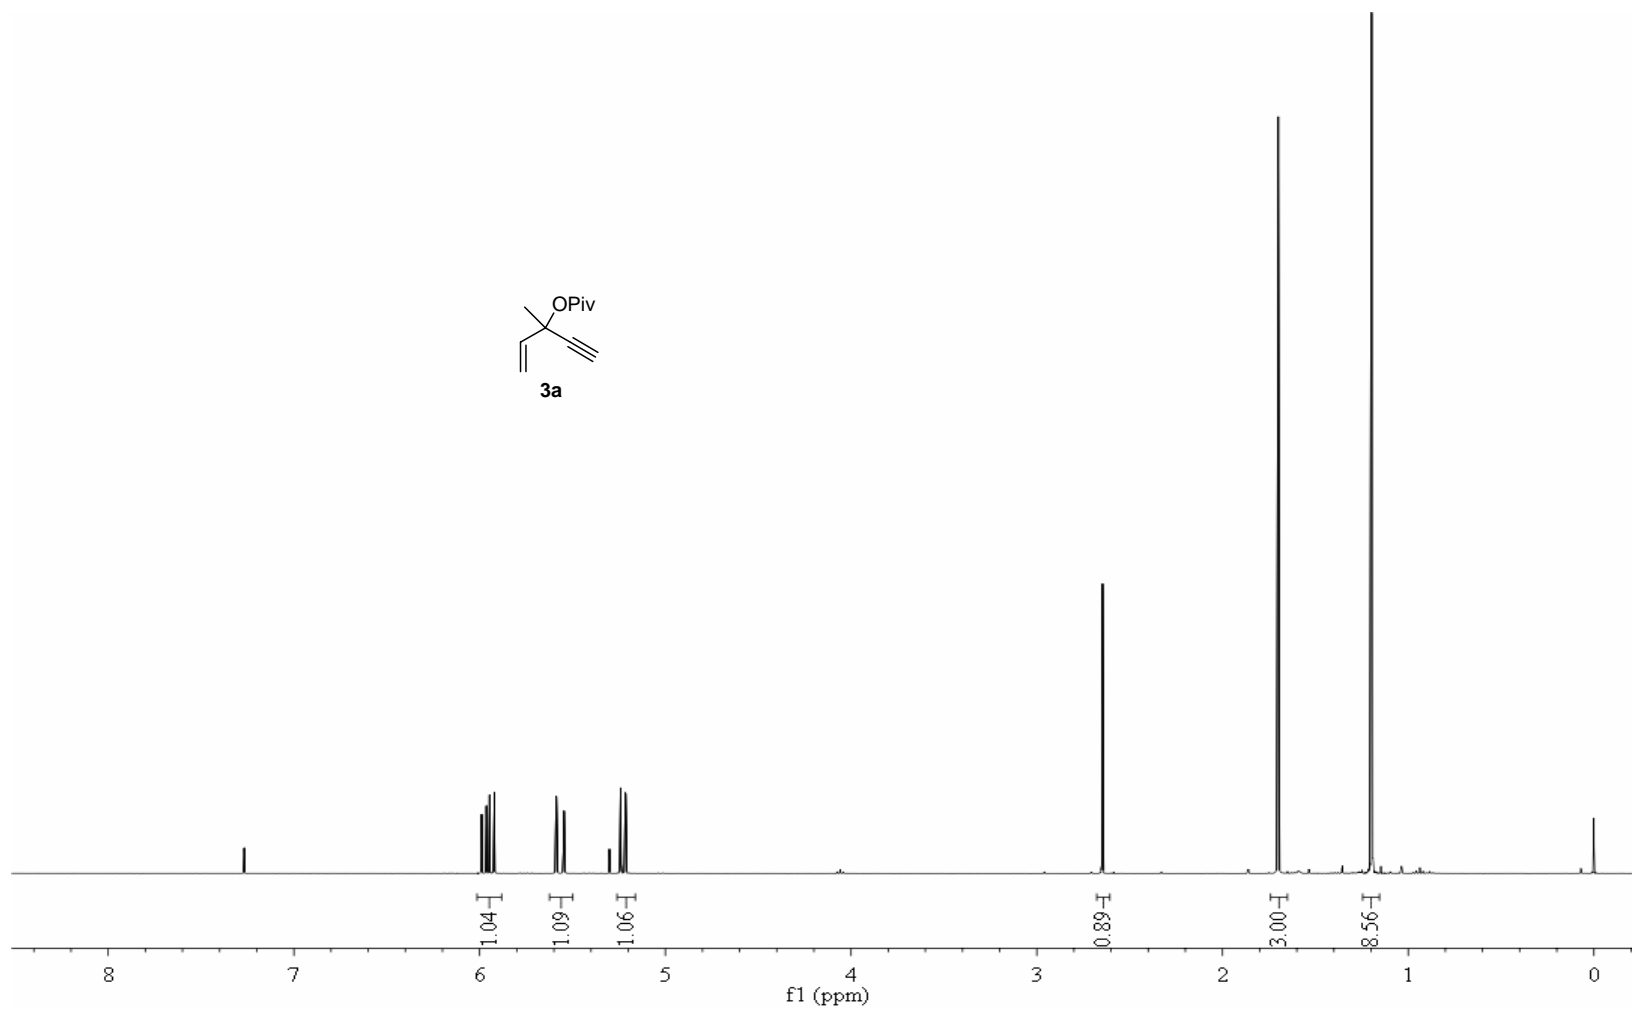

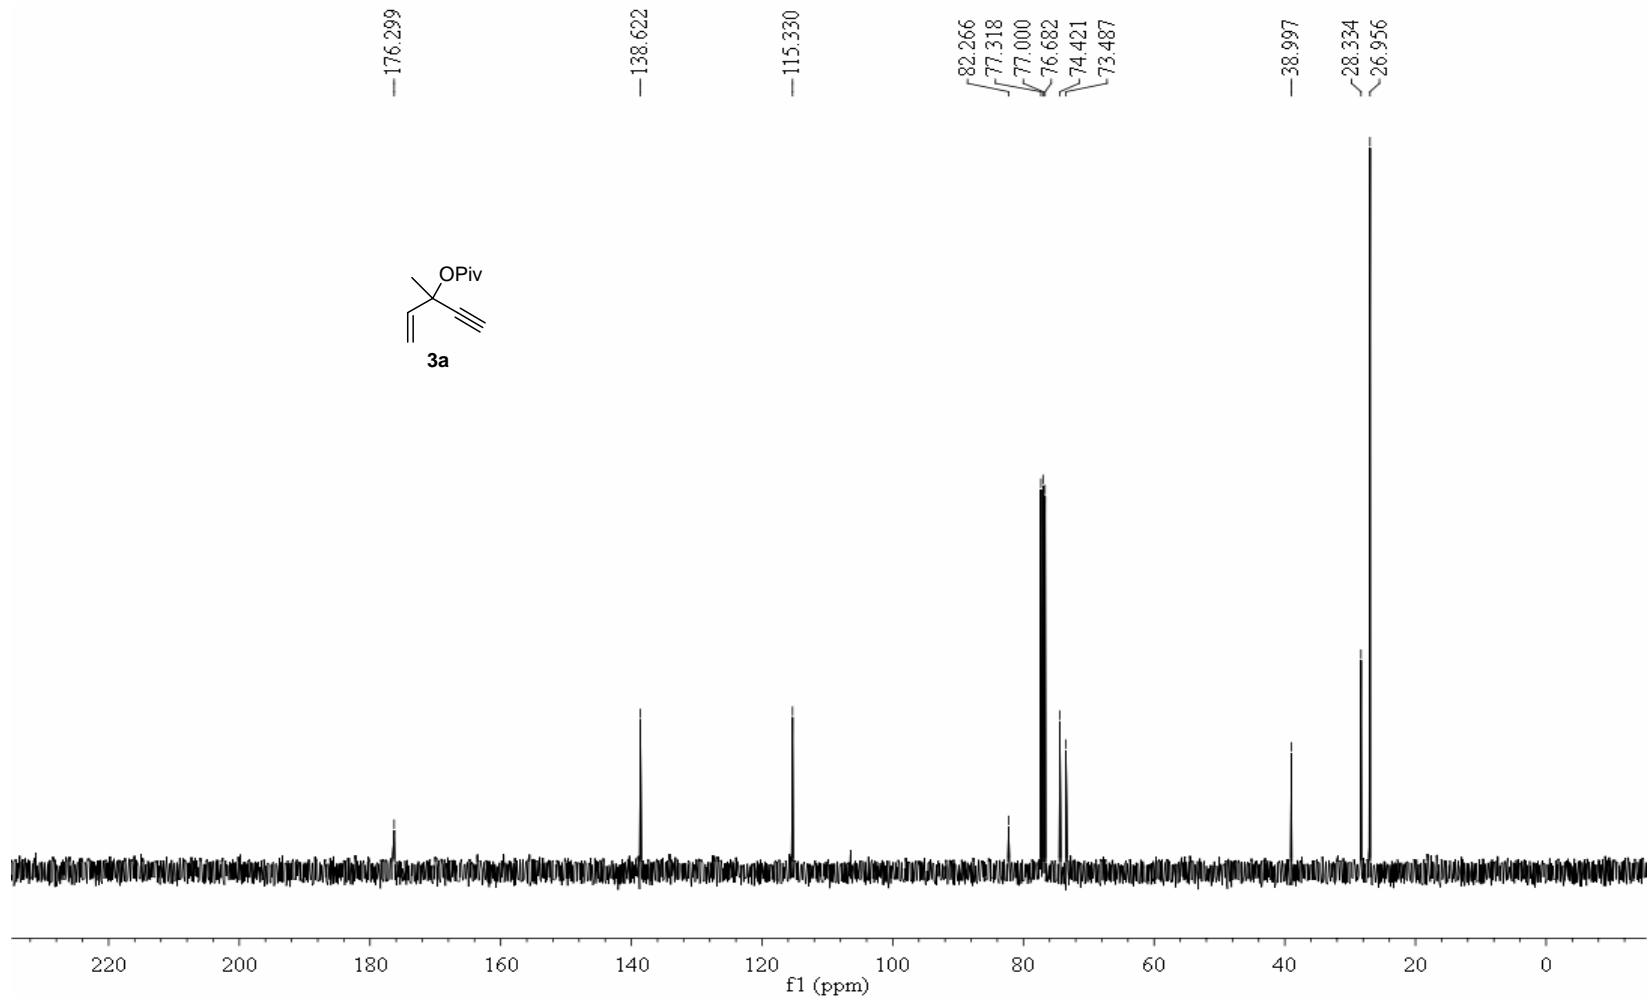



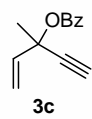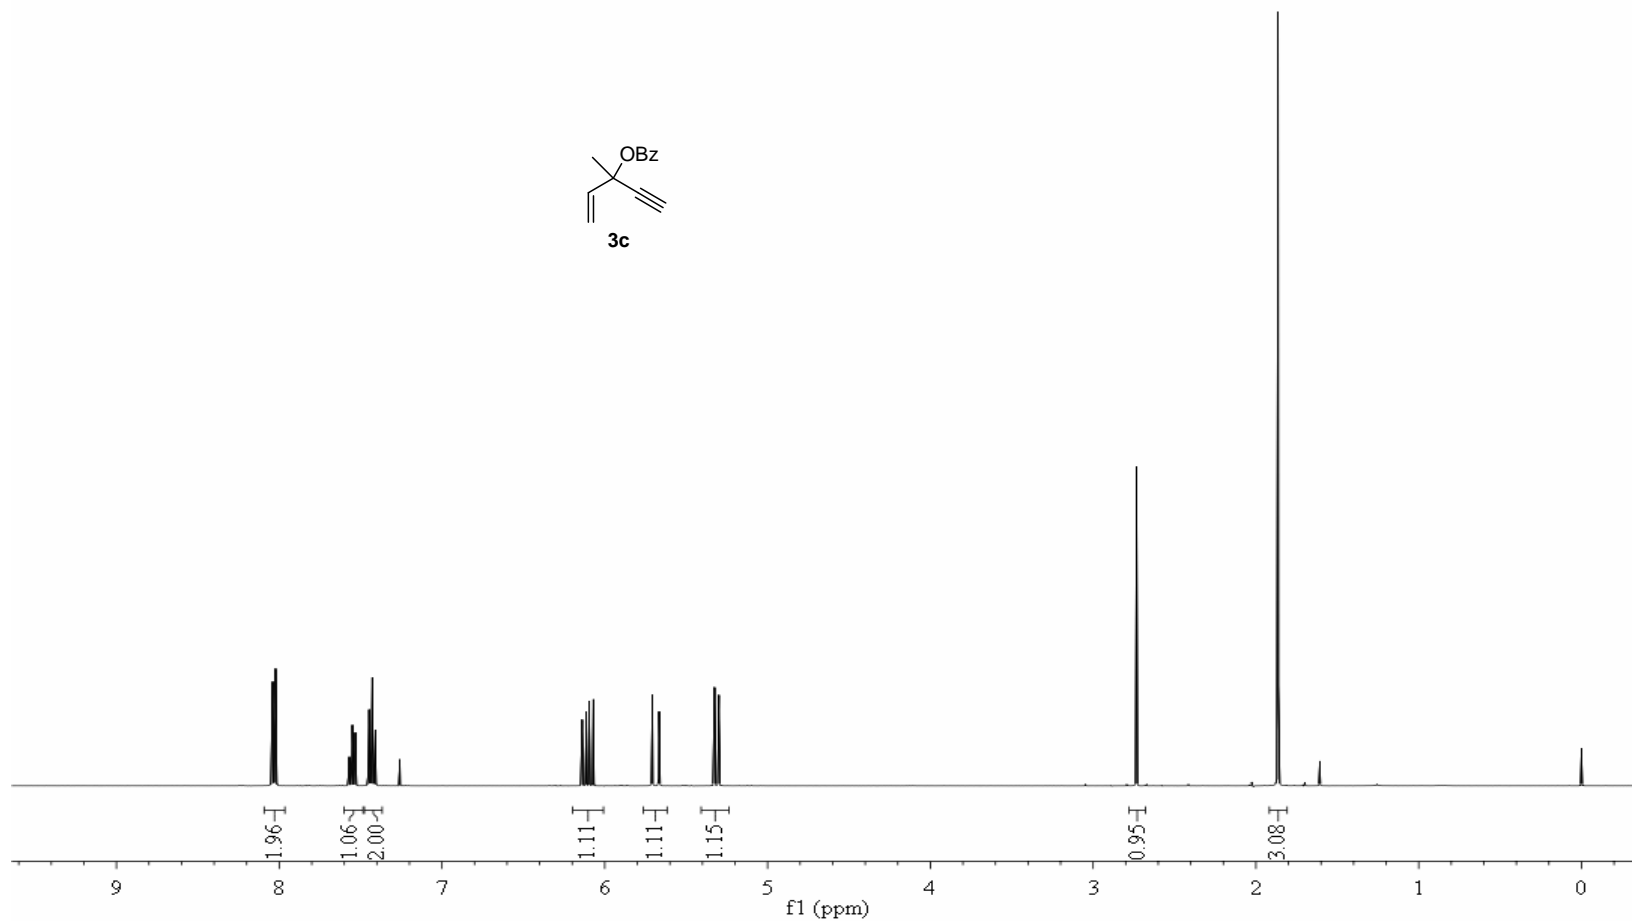

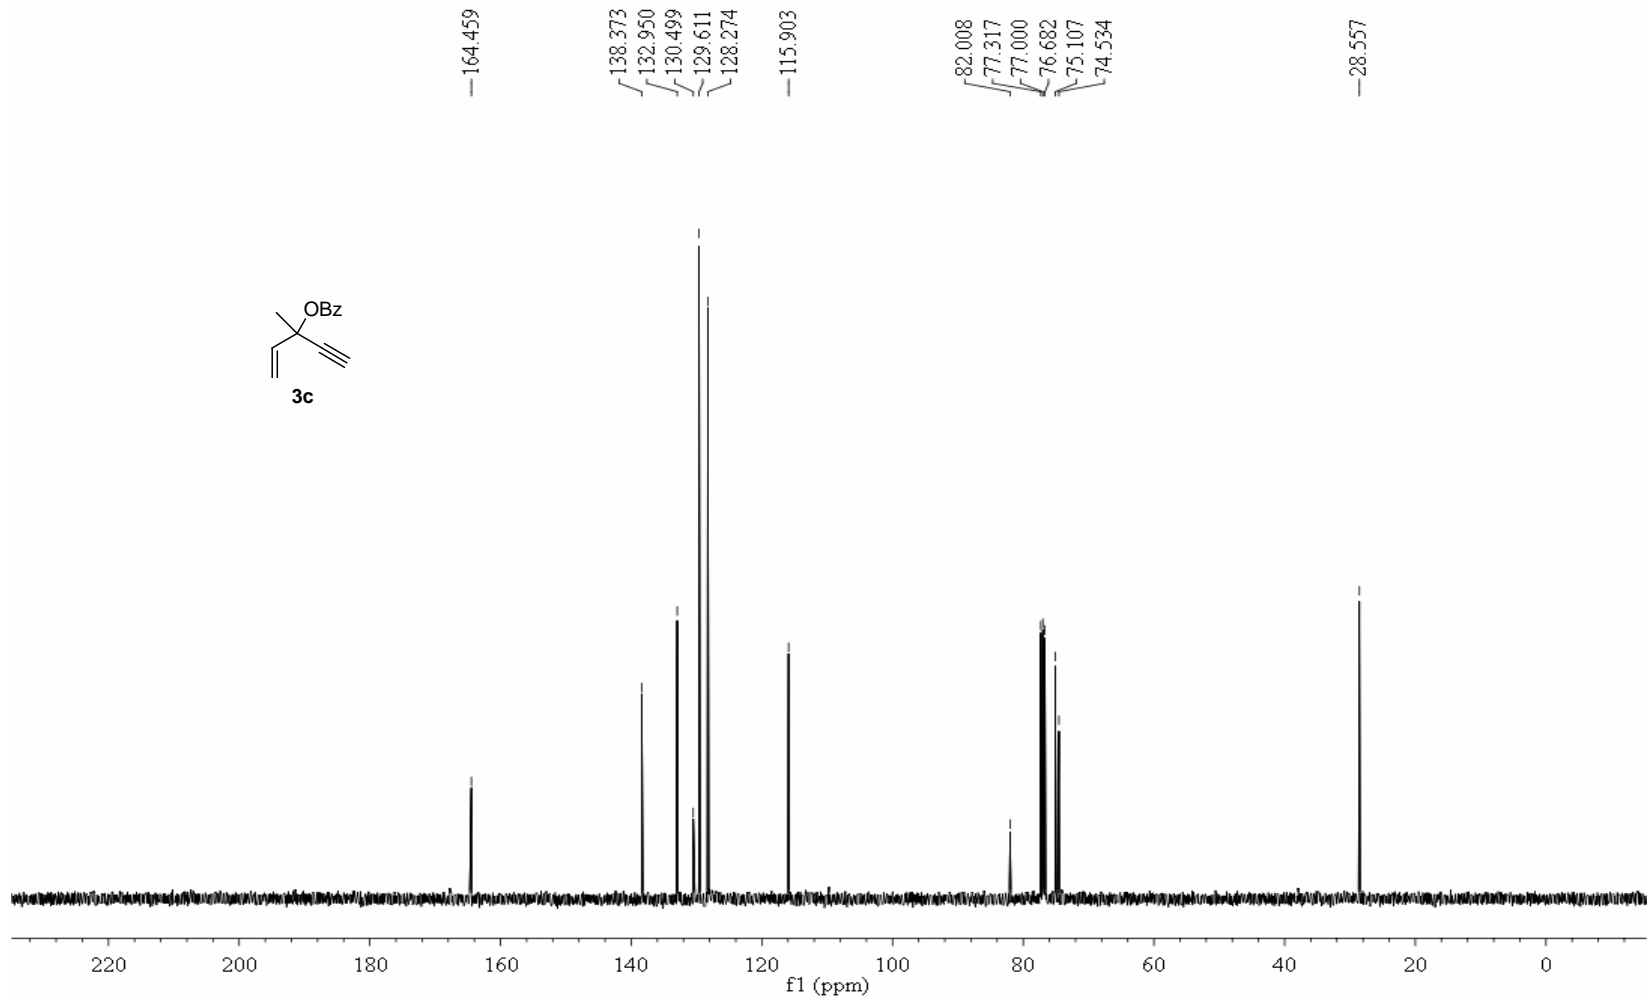

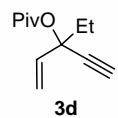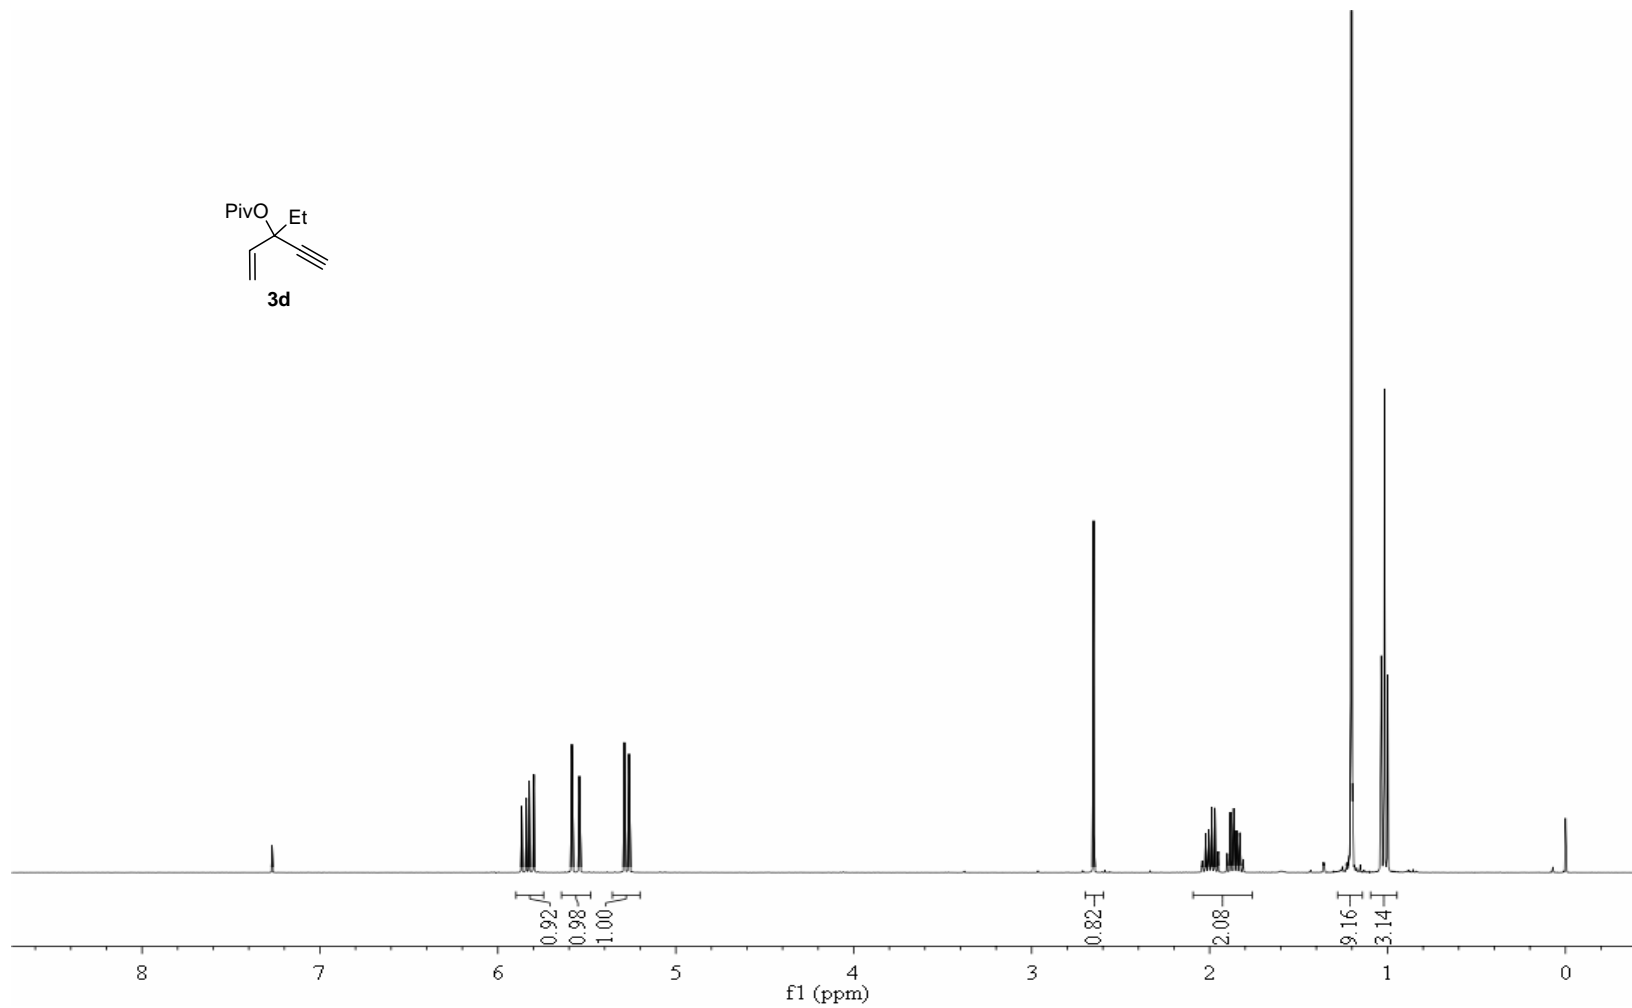

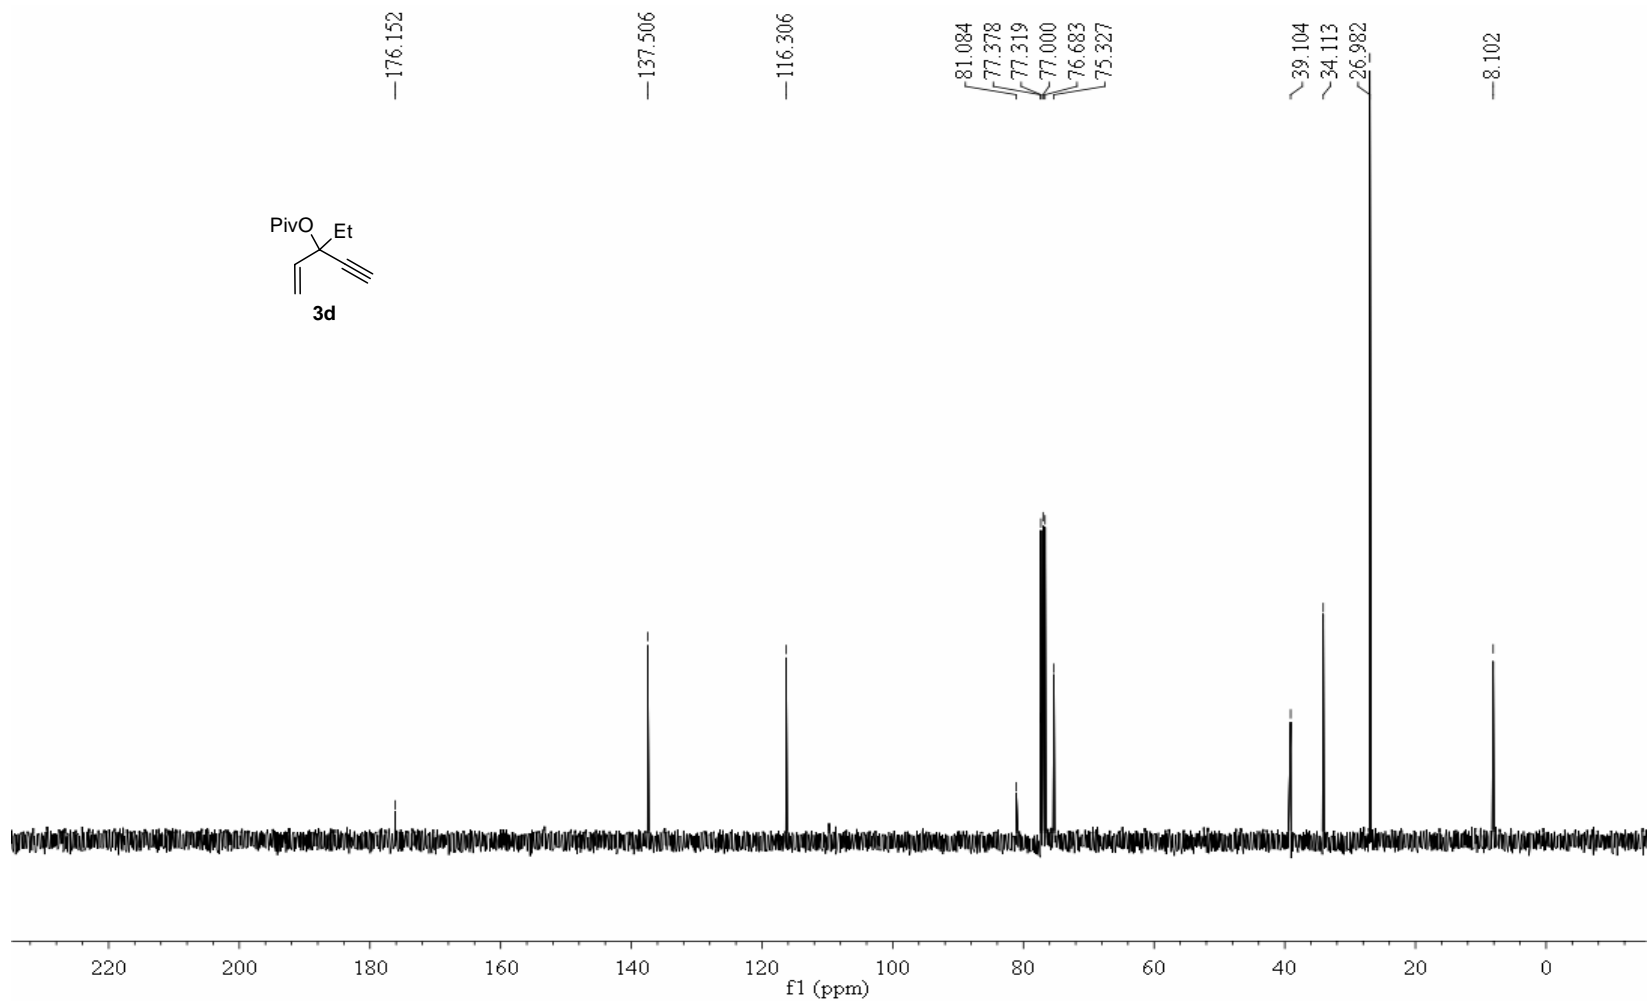

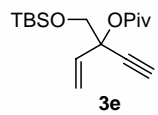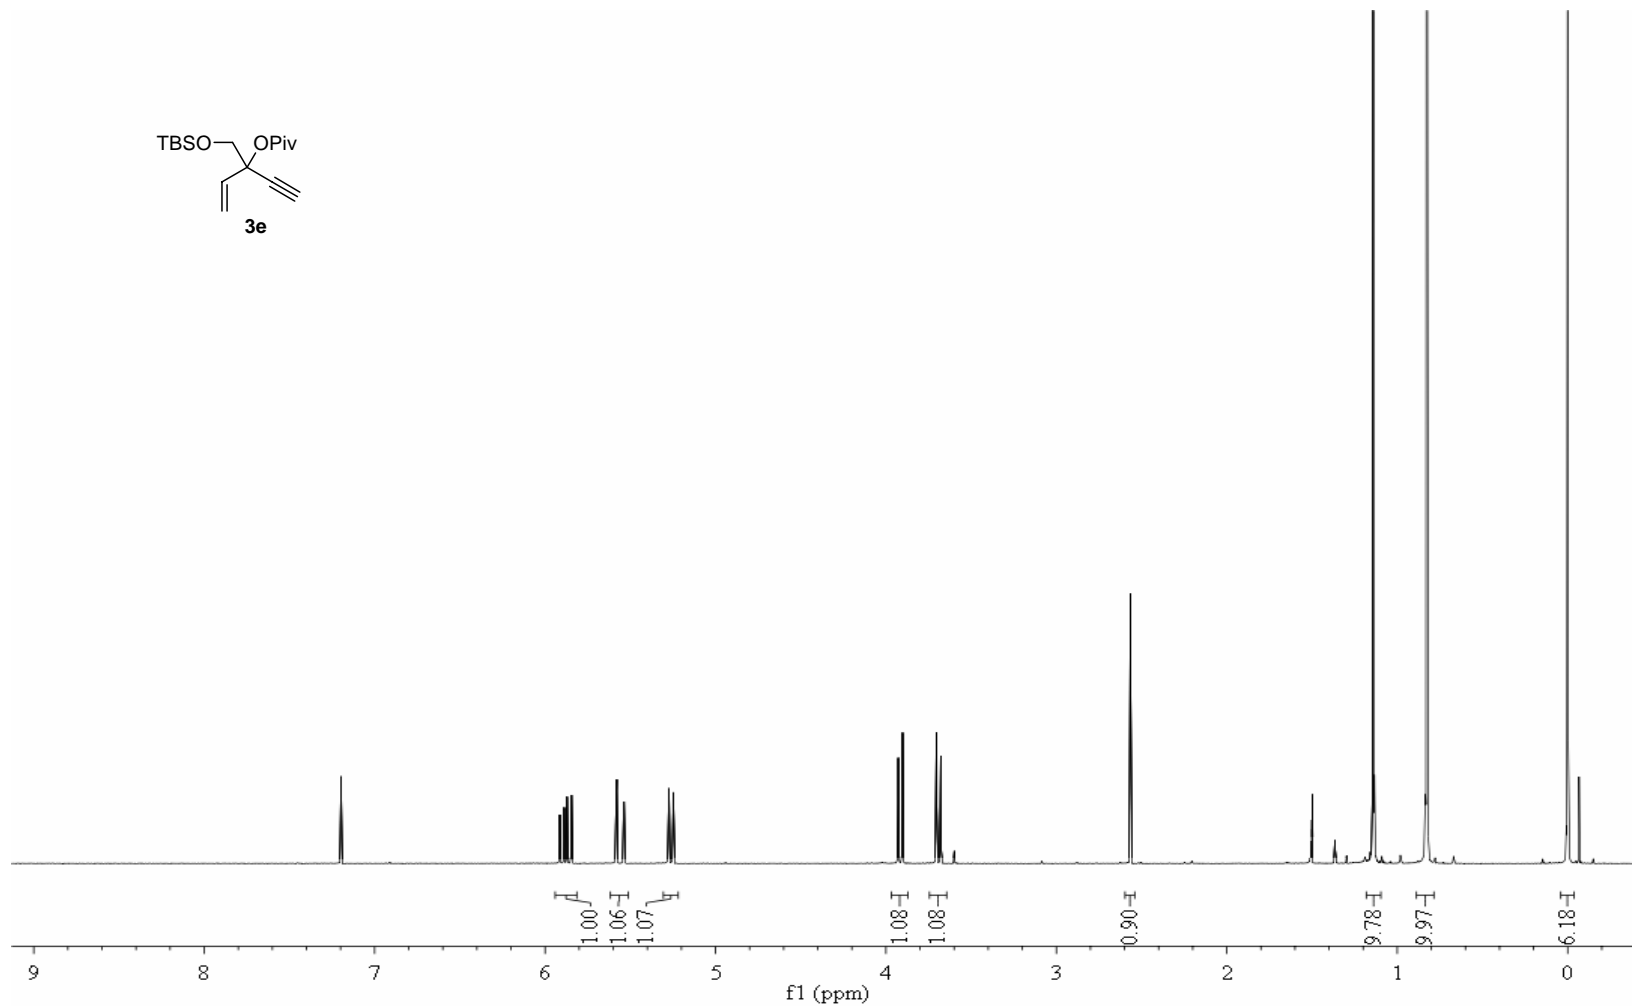

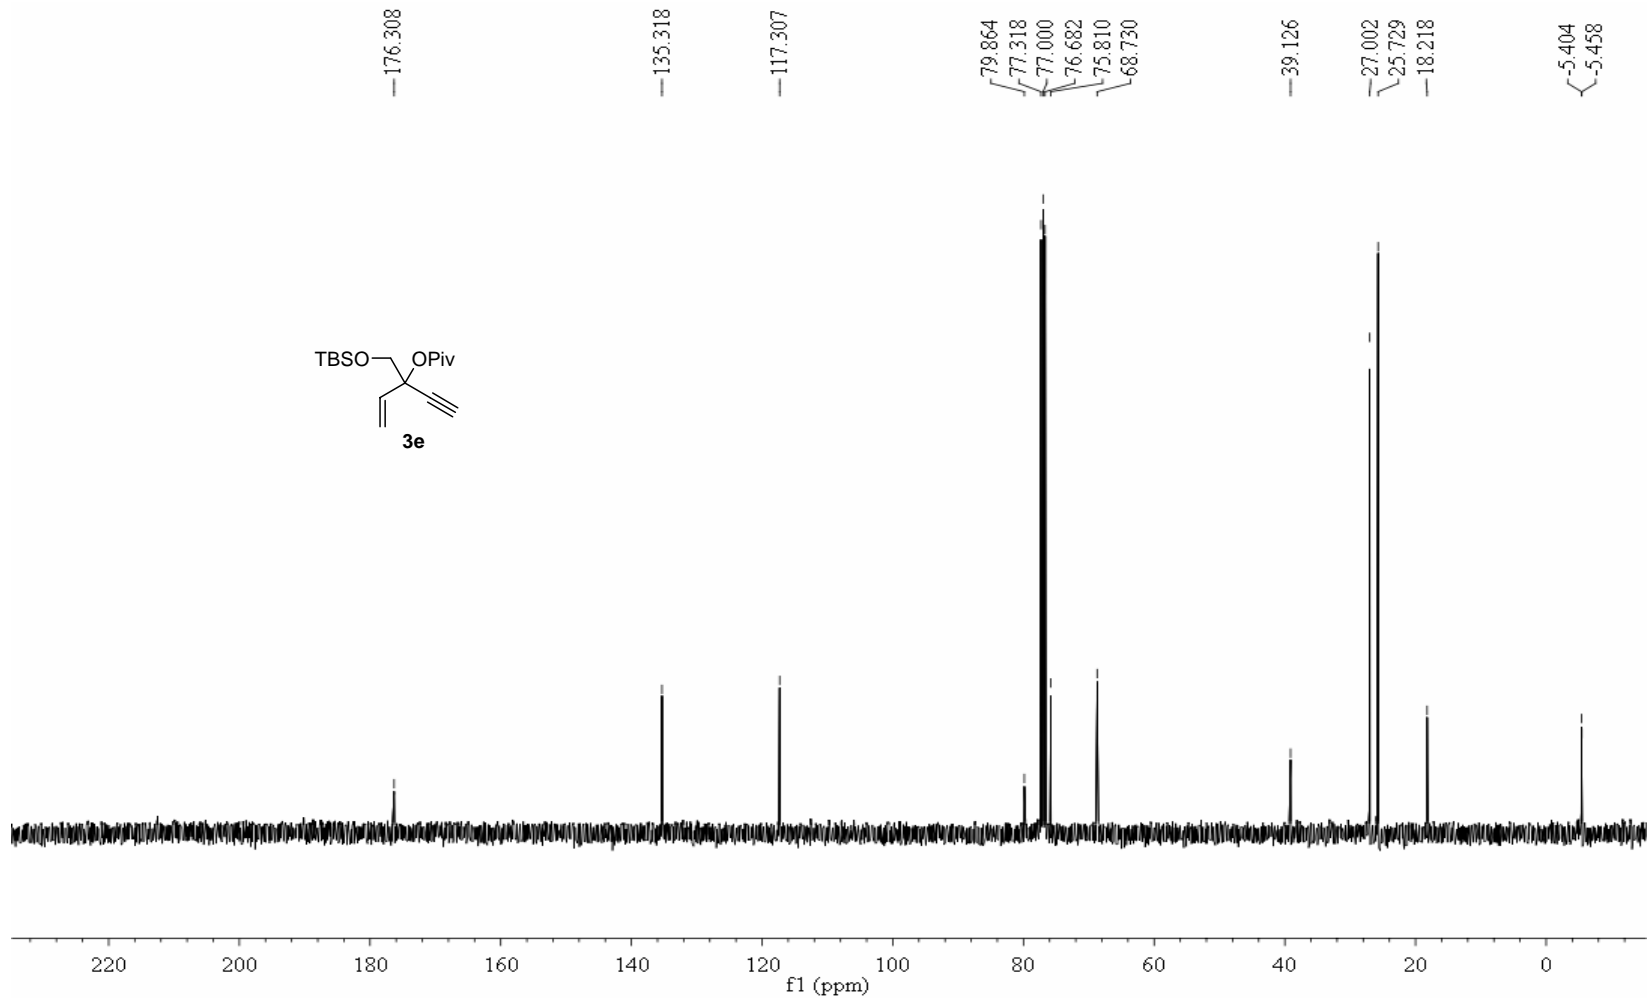

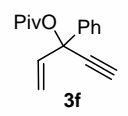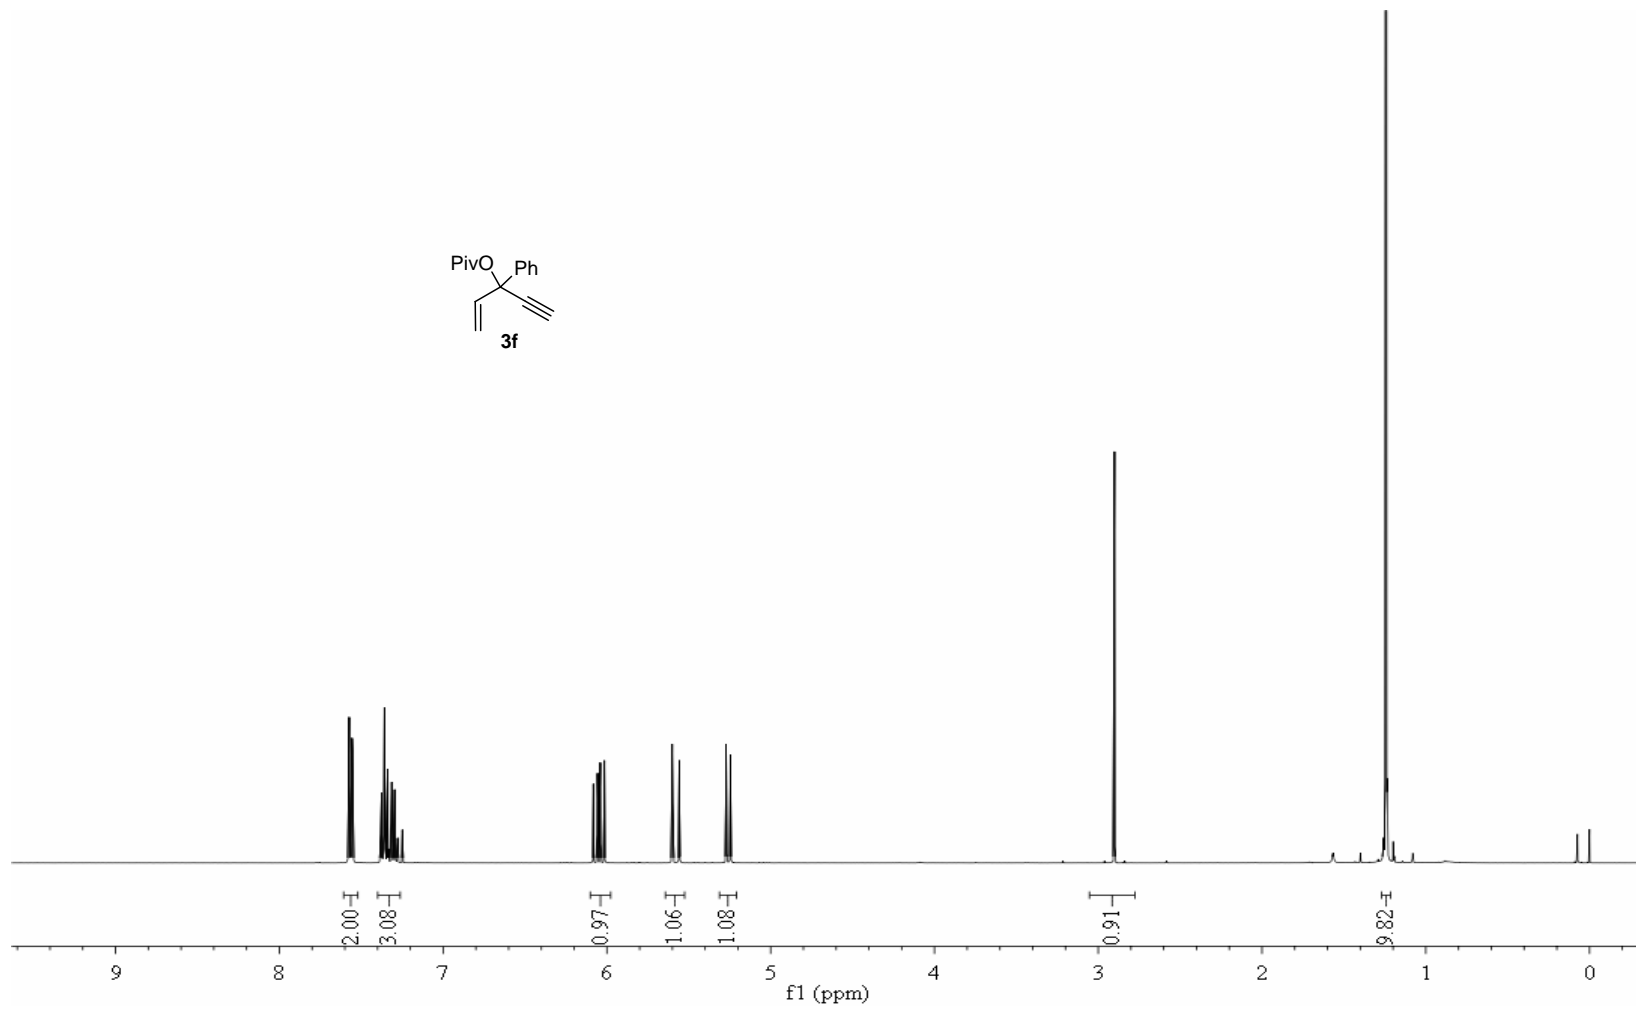

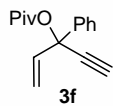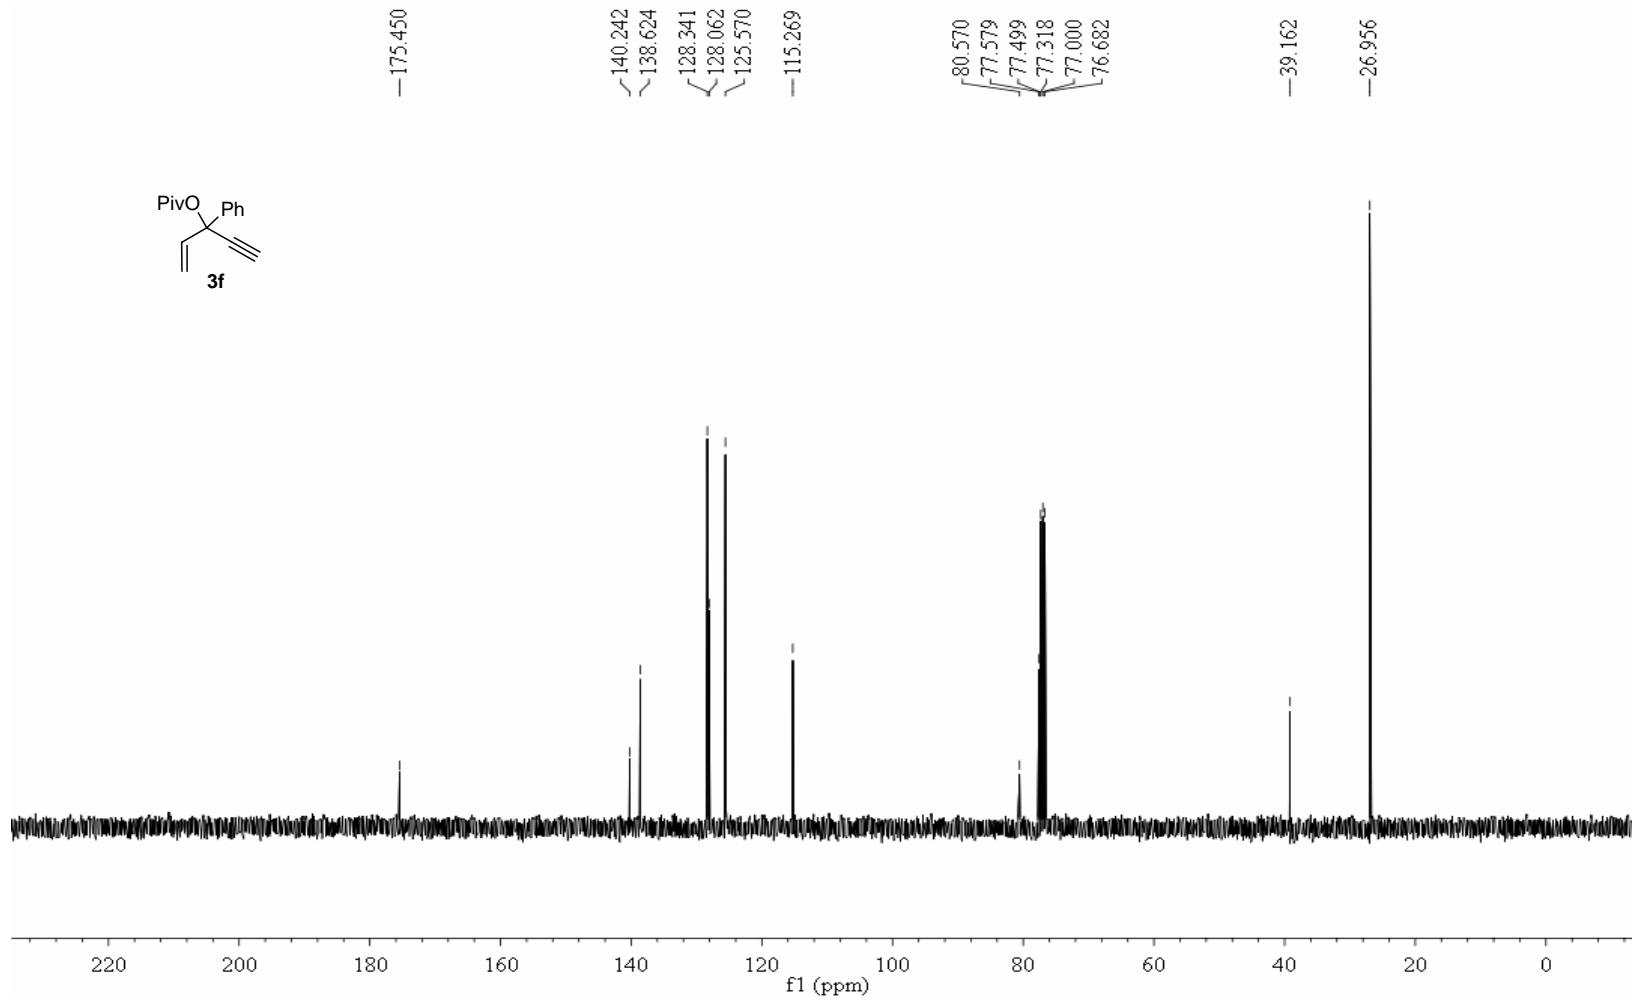



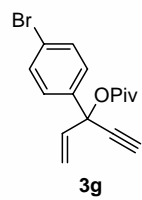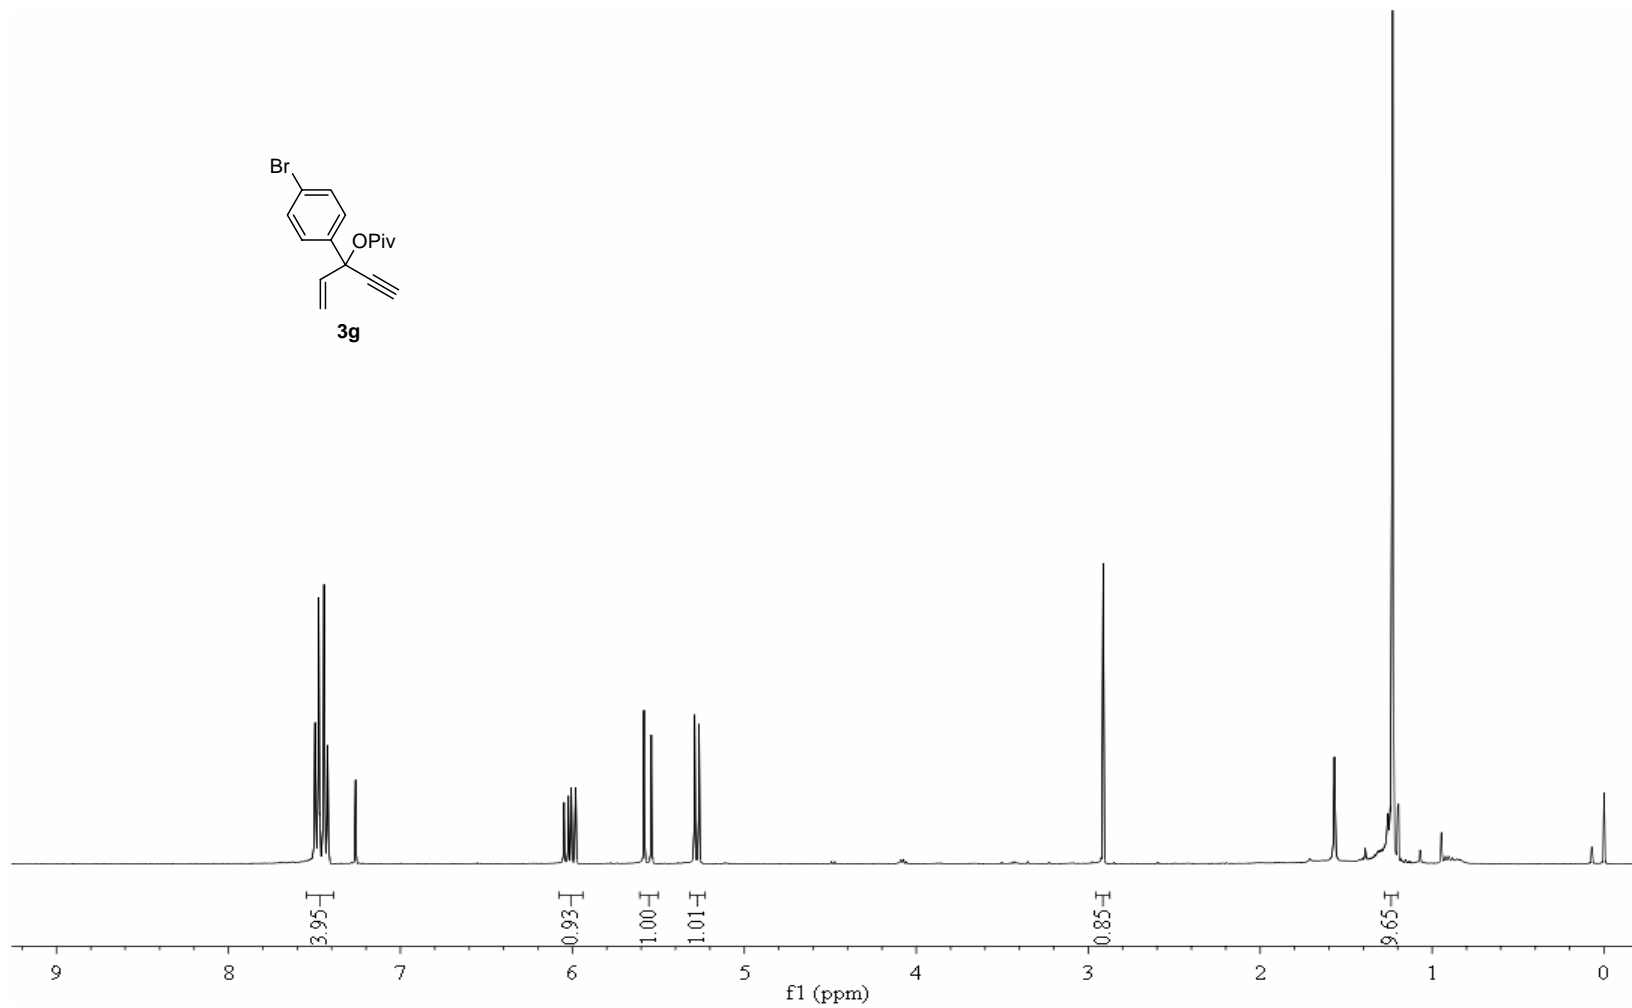

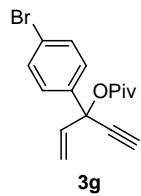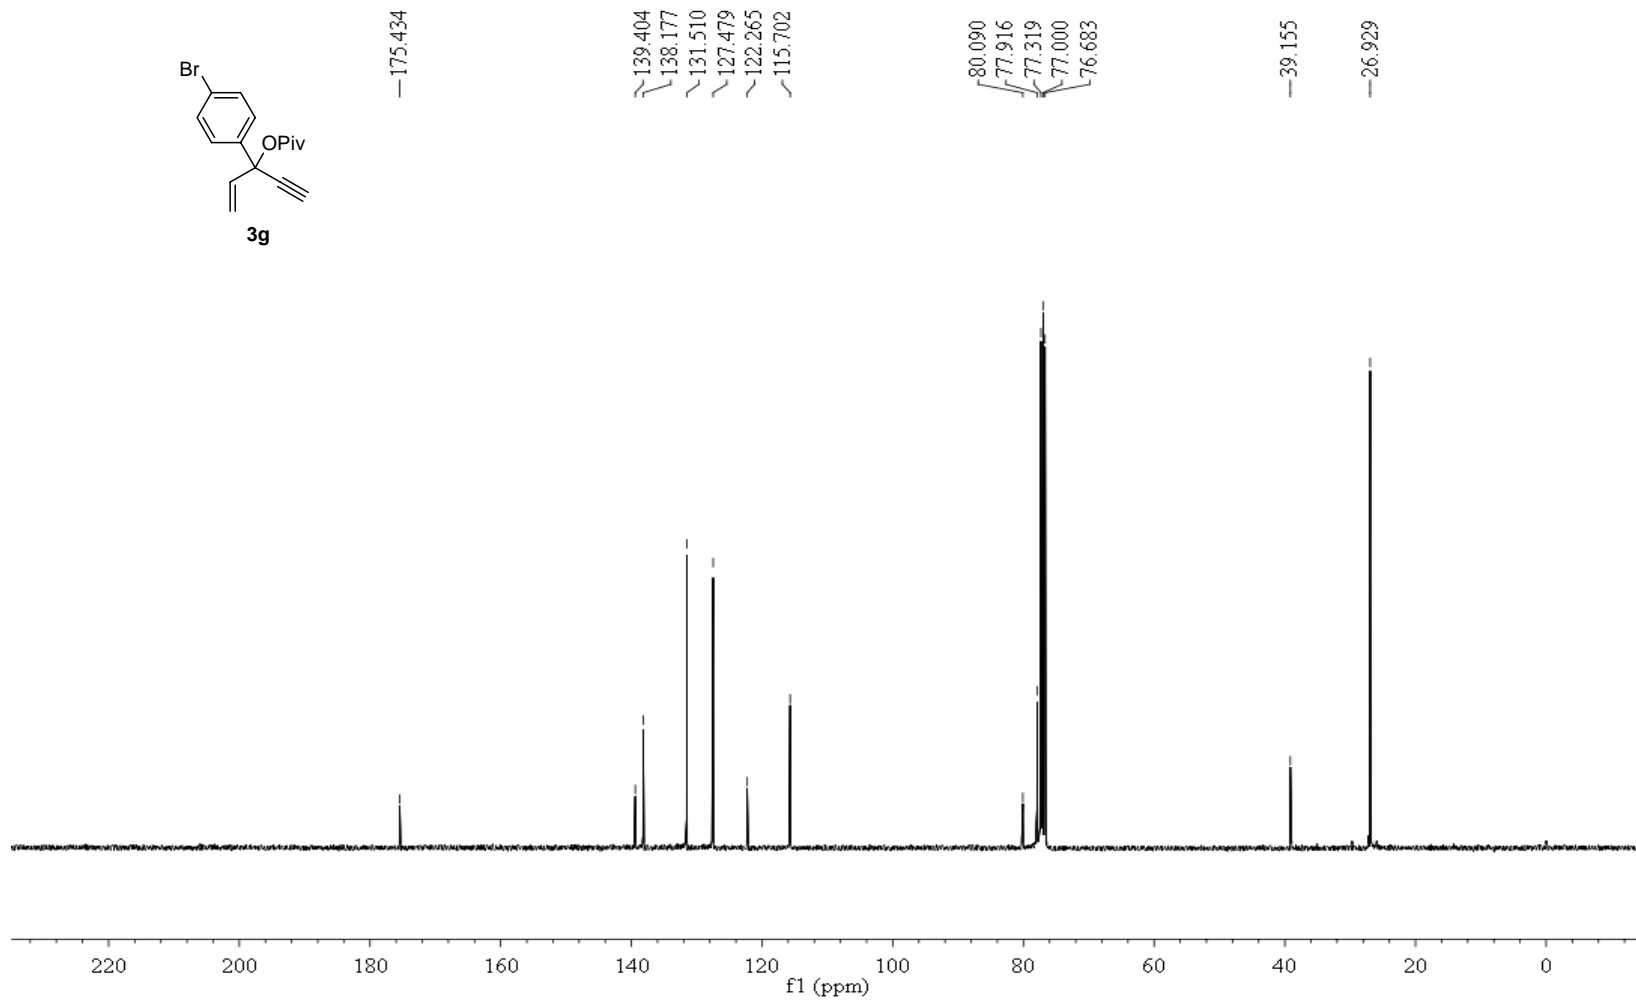

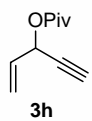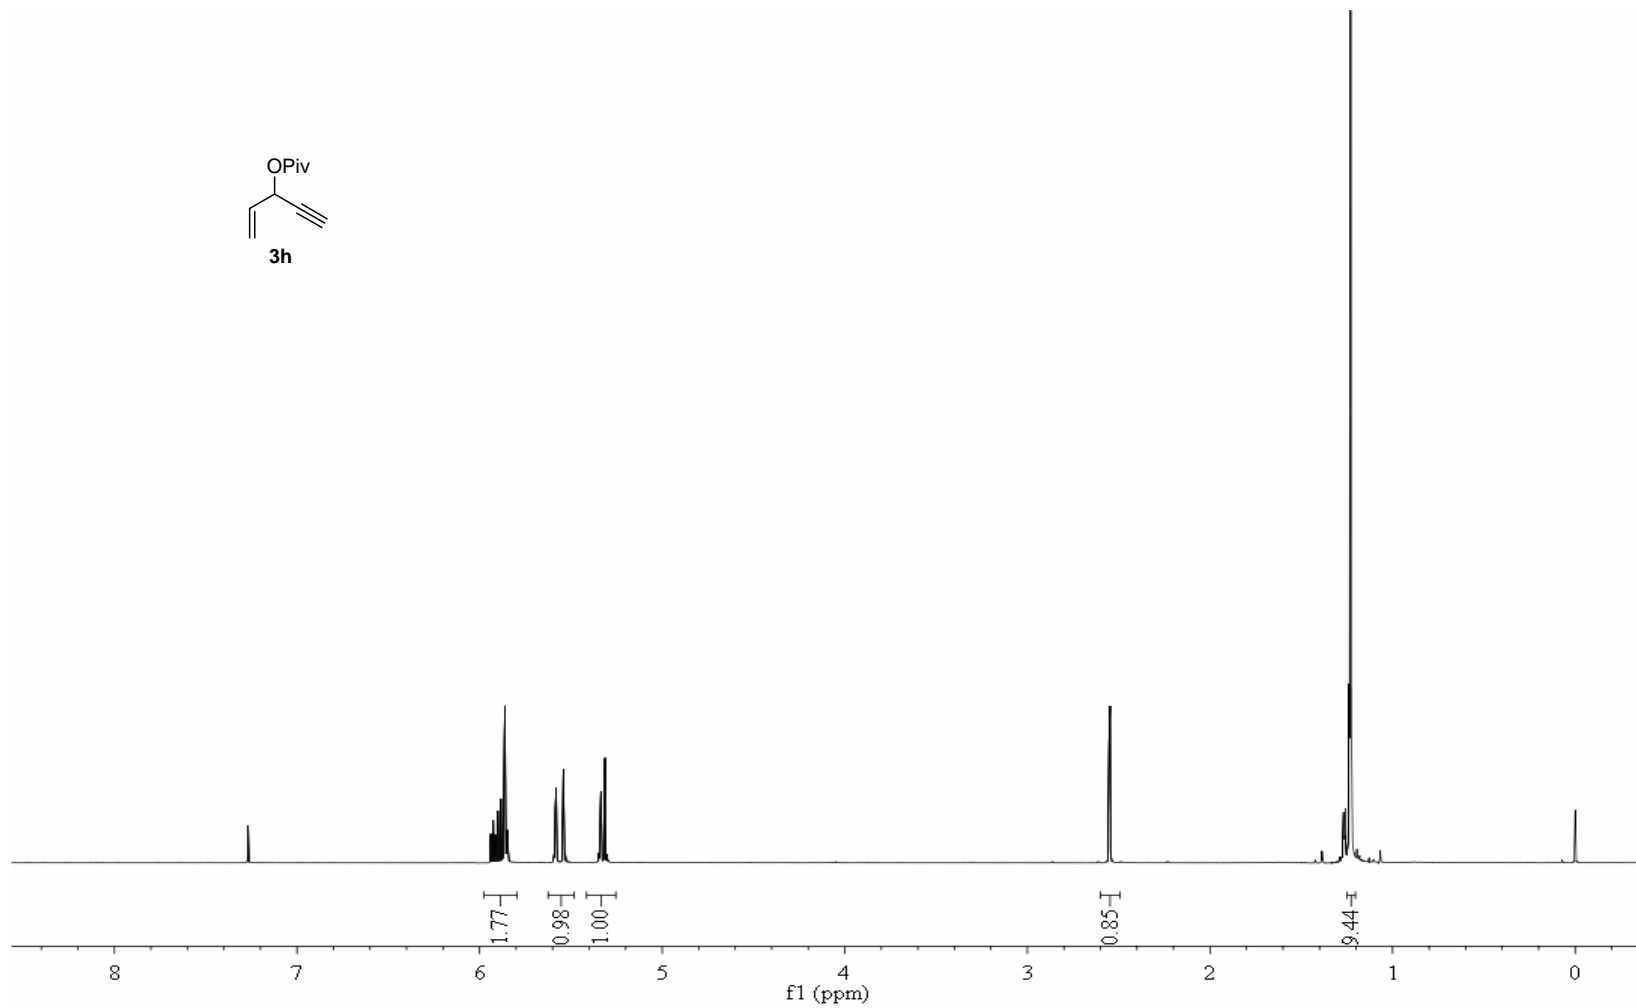

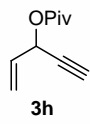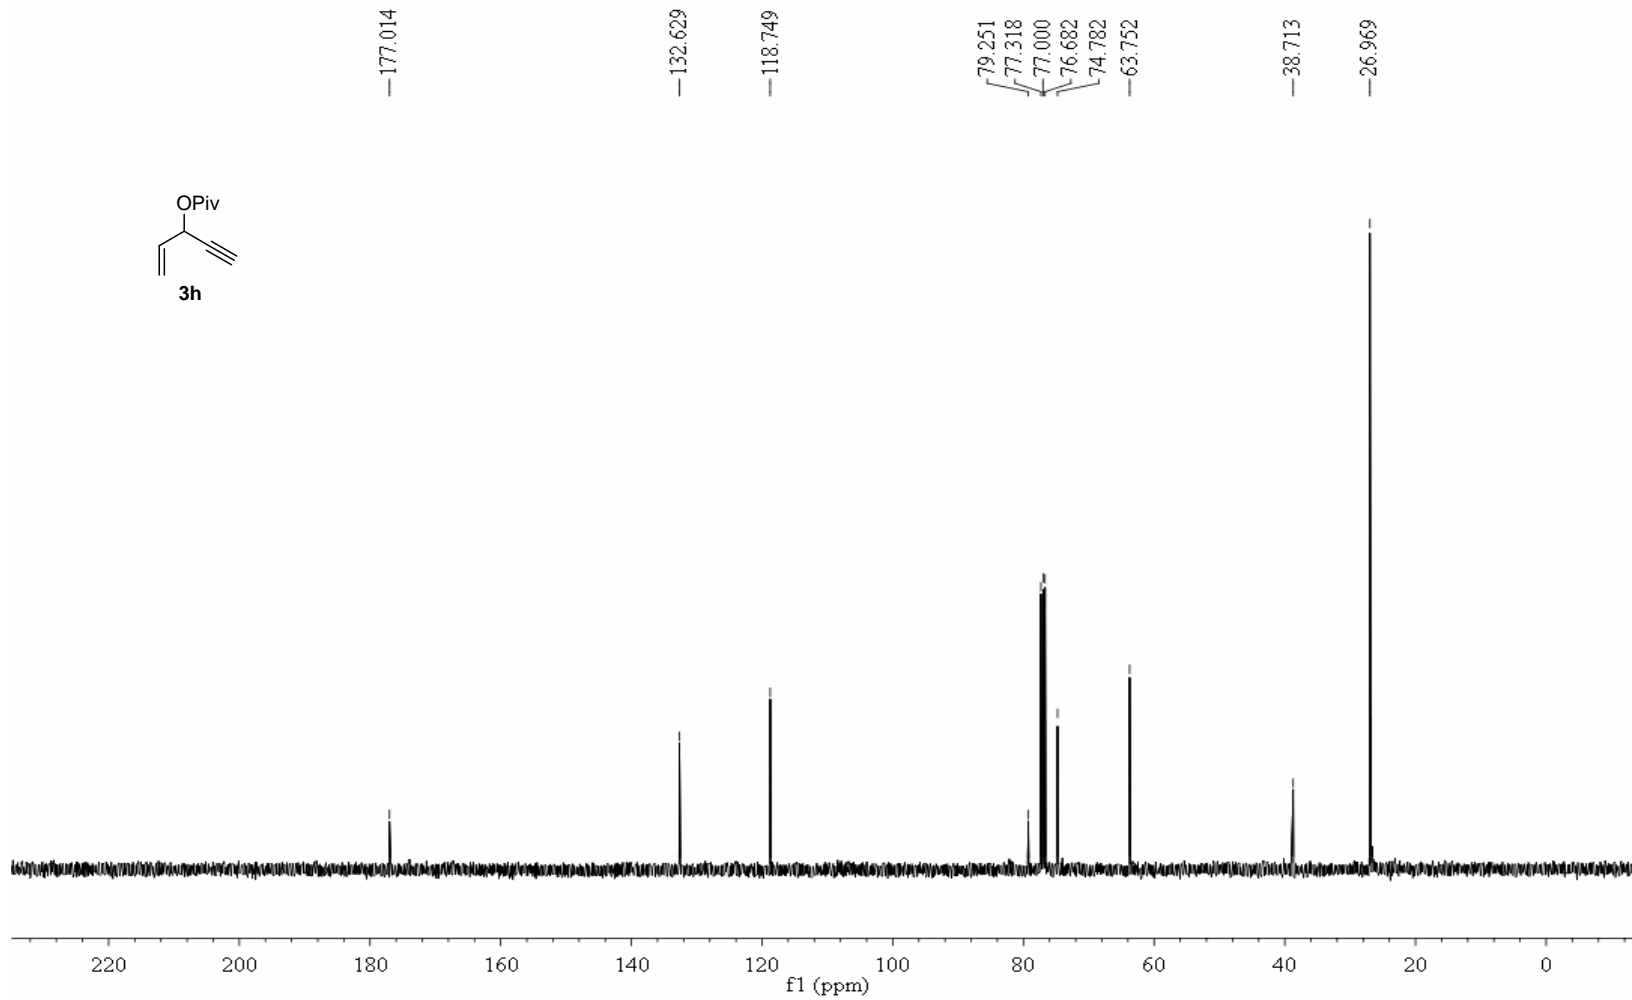

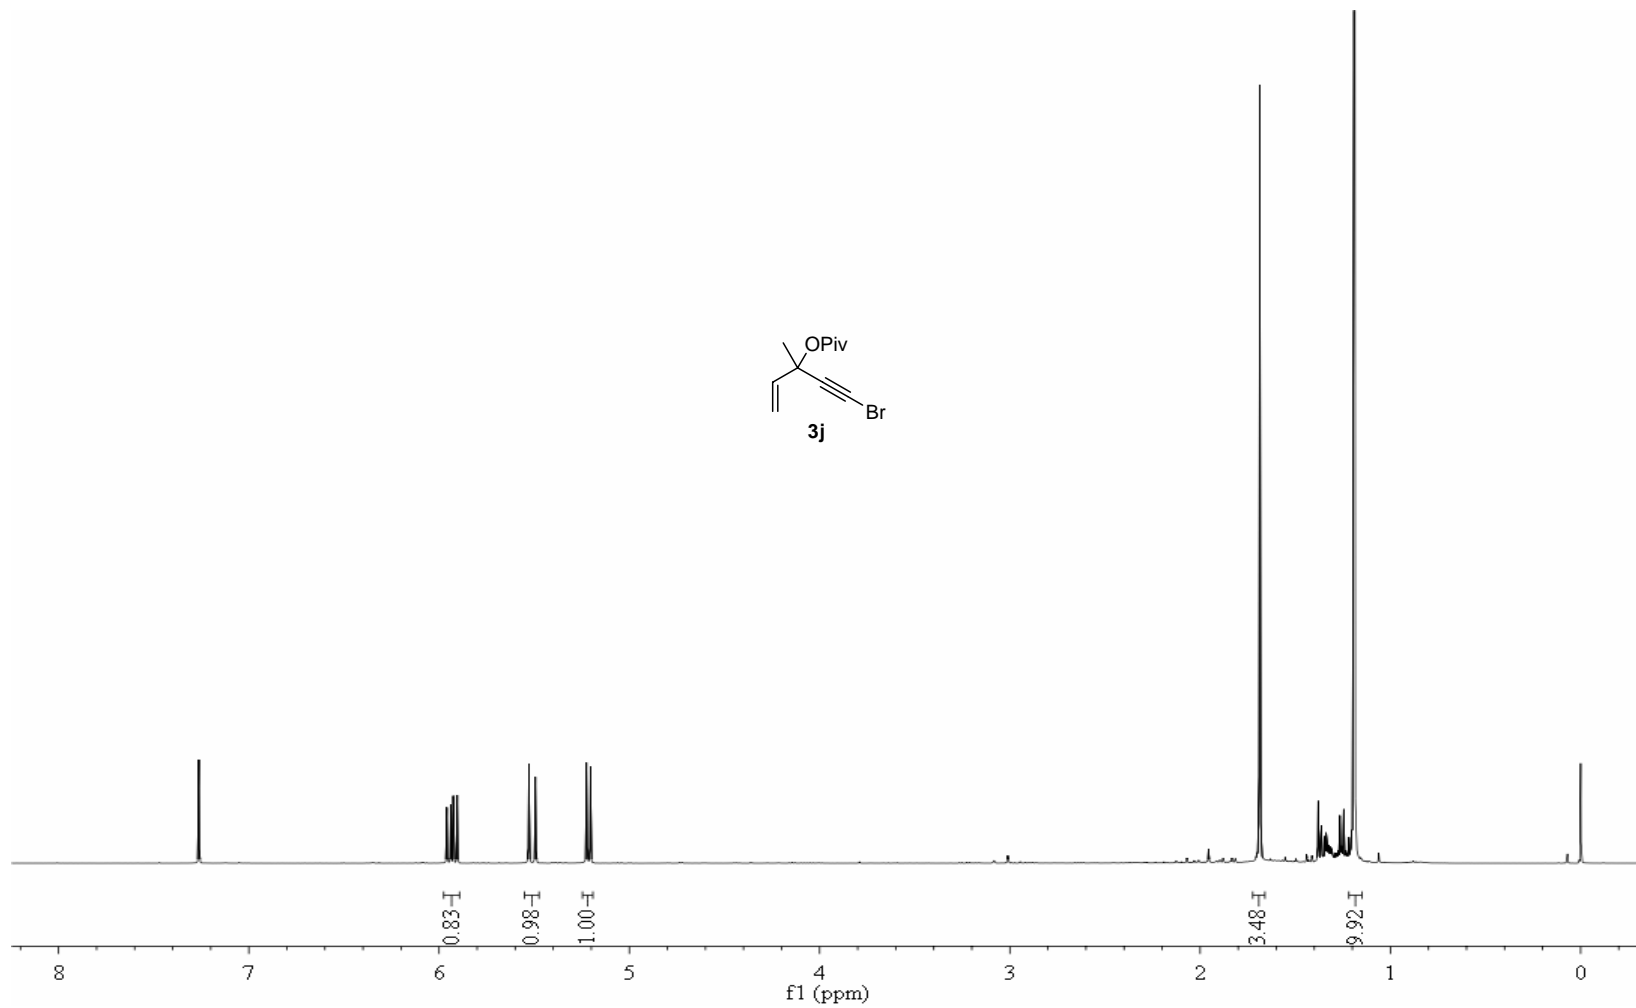

S101

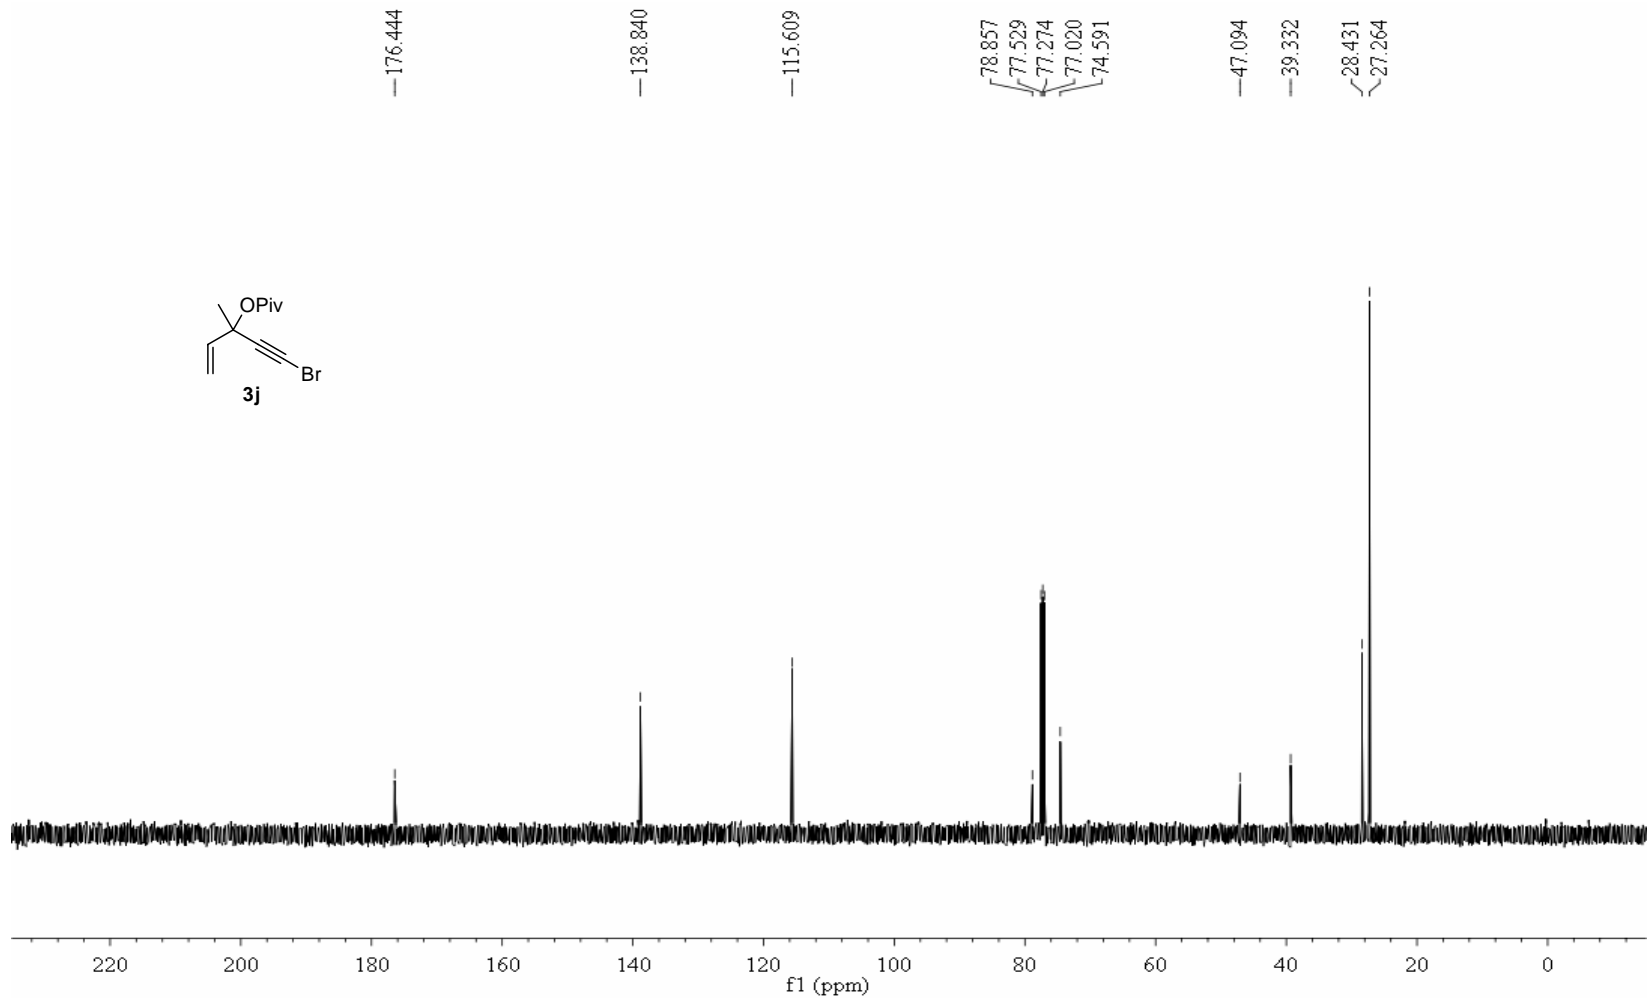

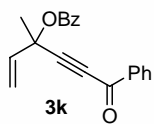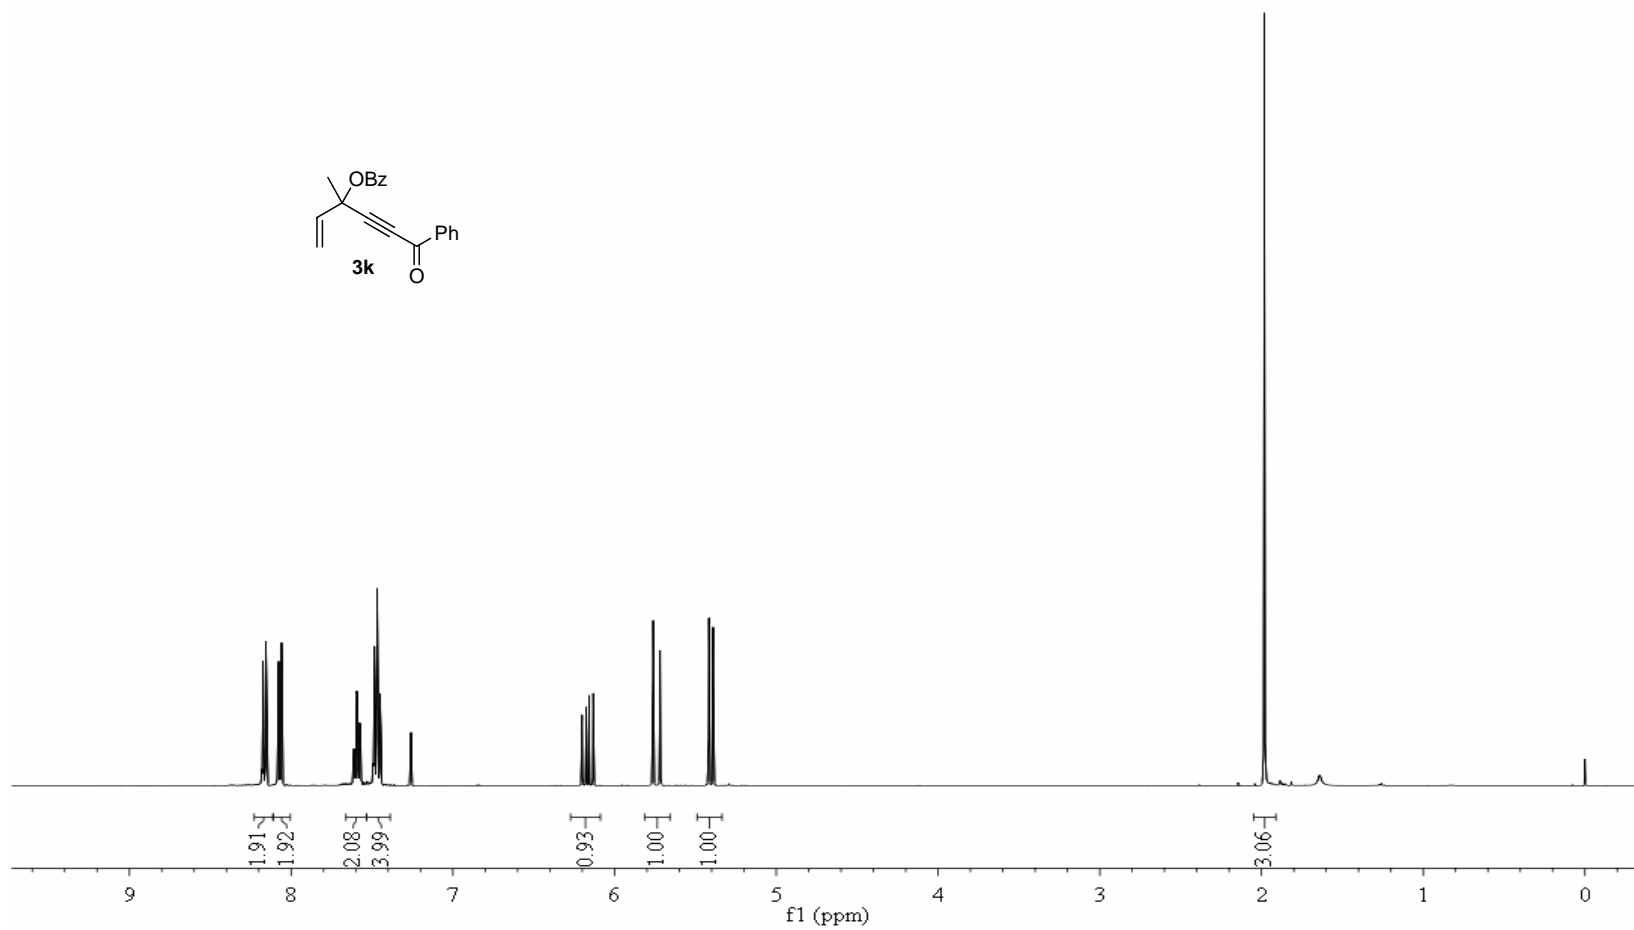

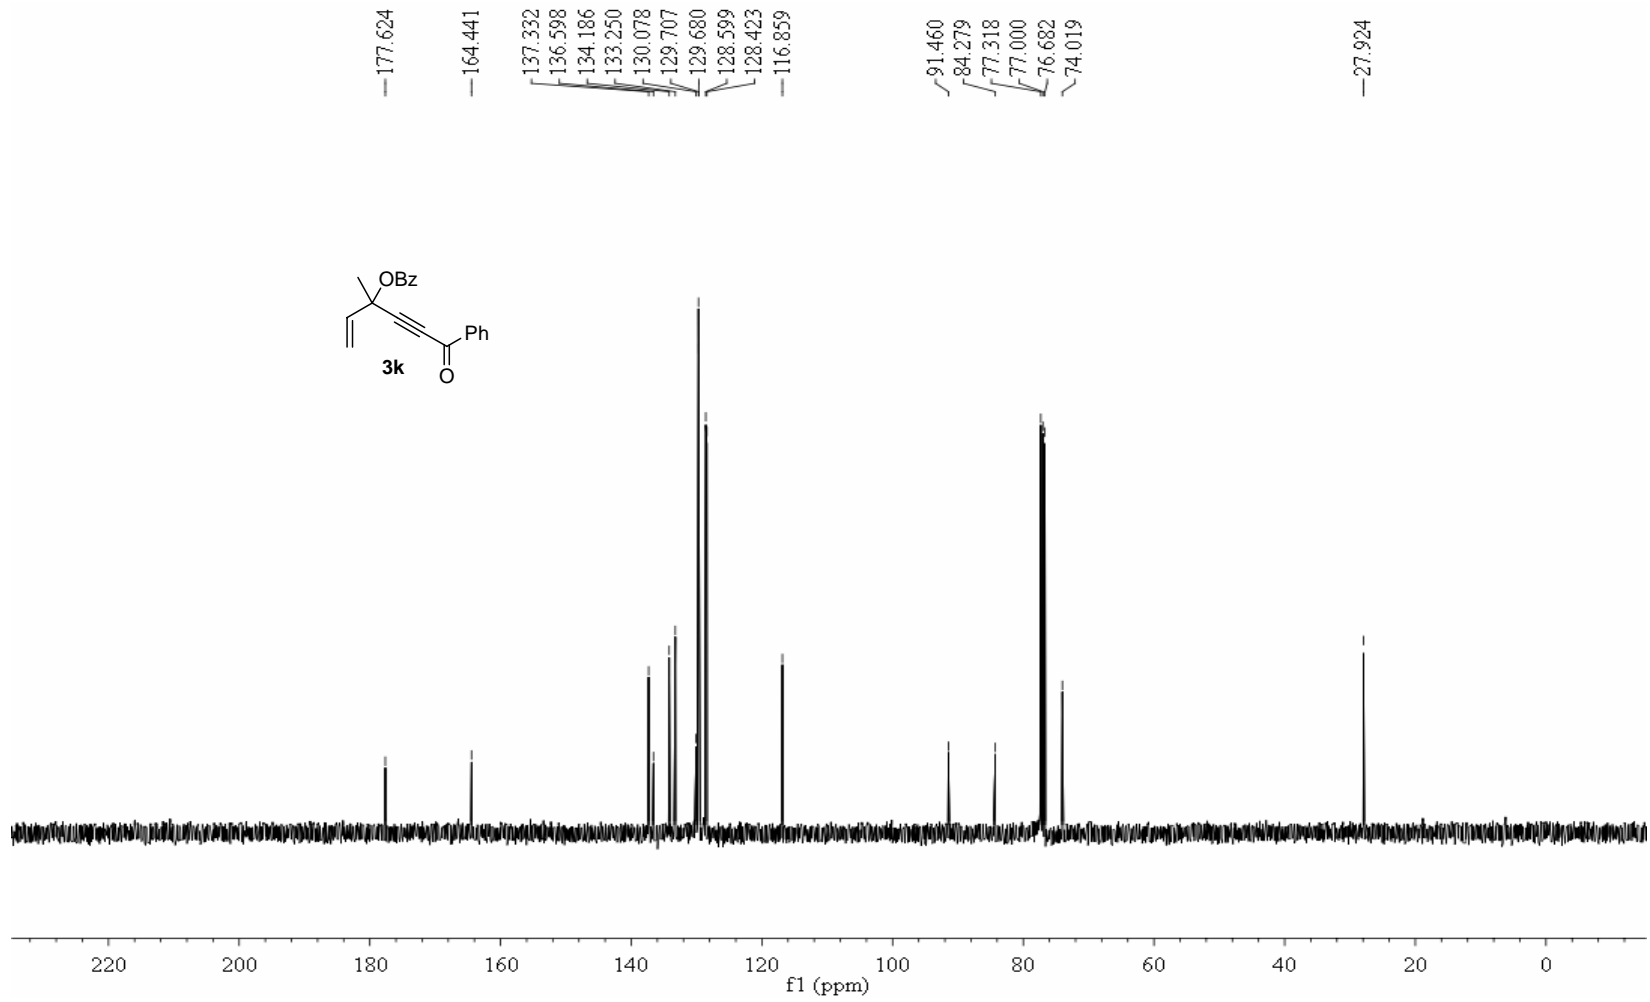



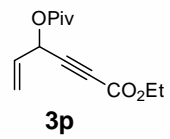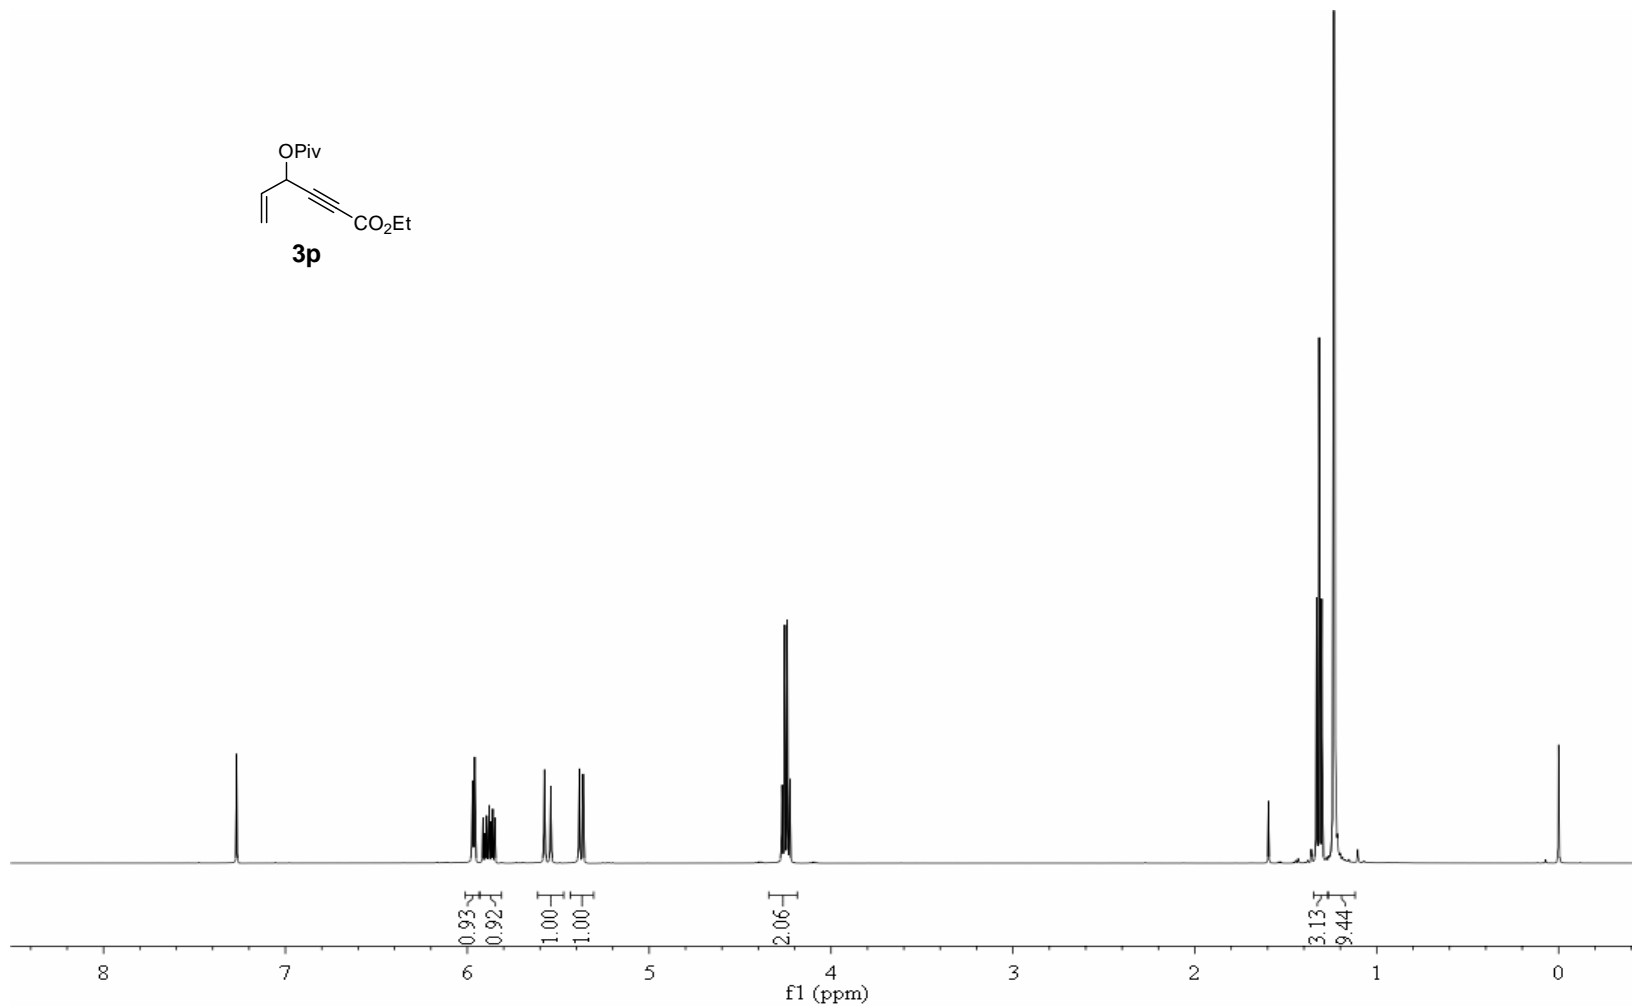

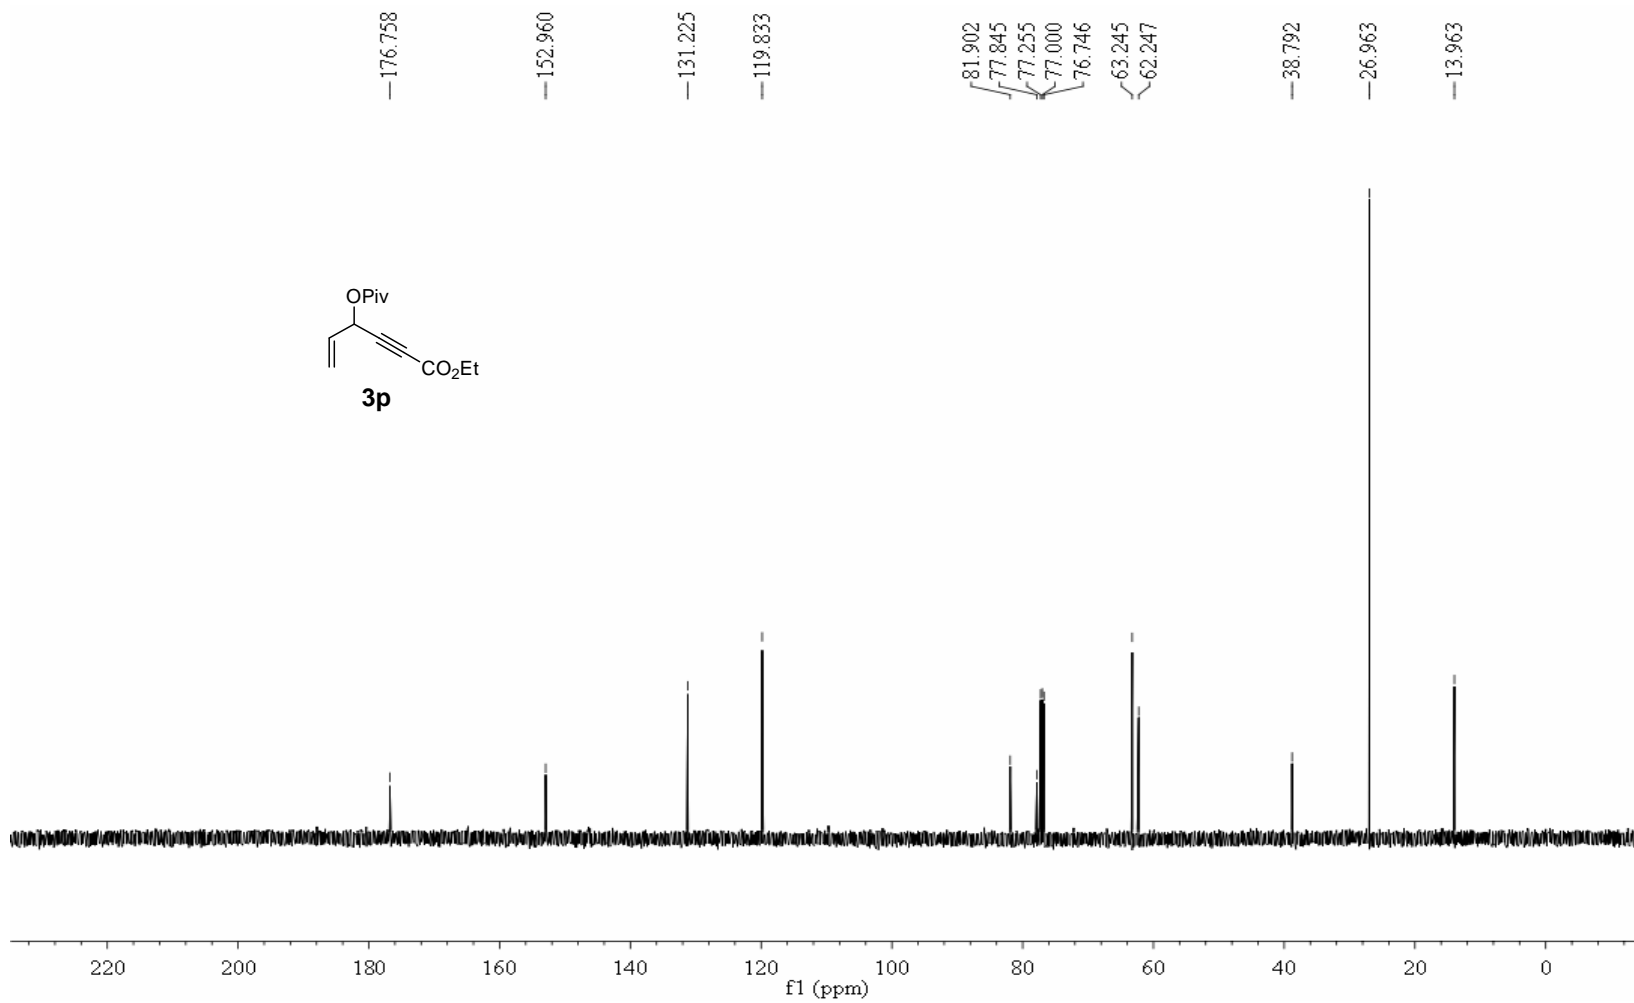

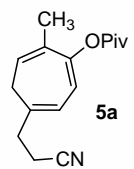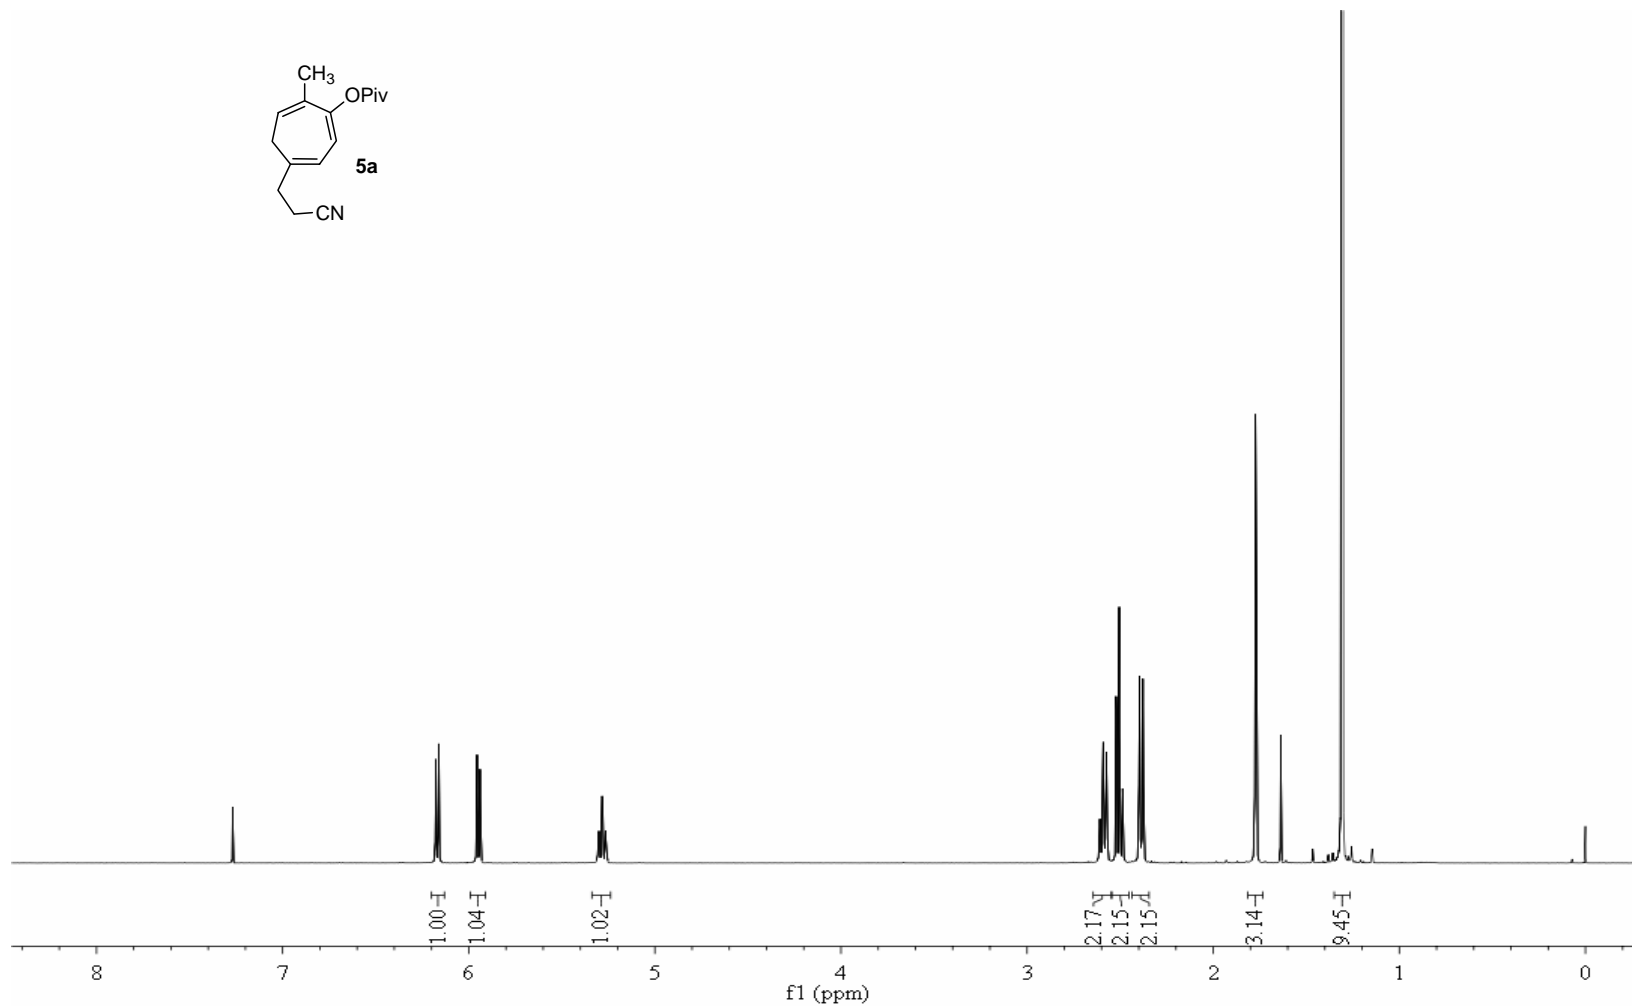

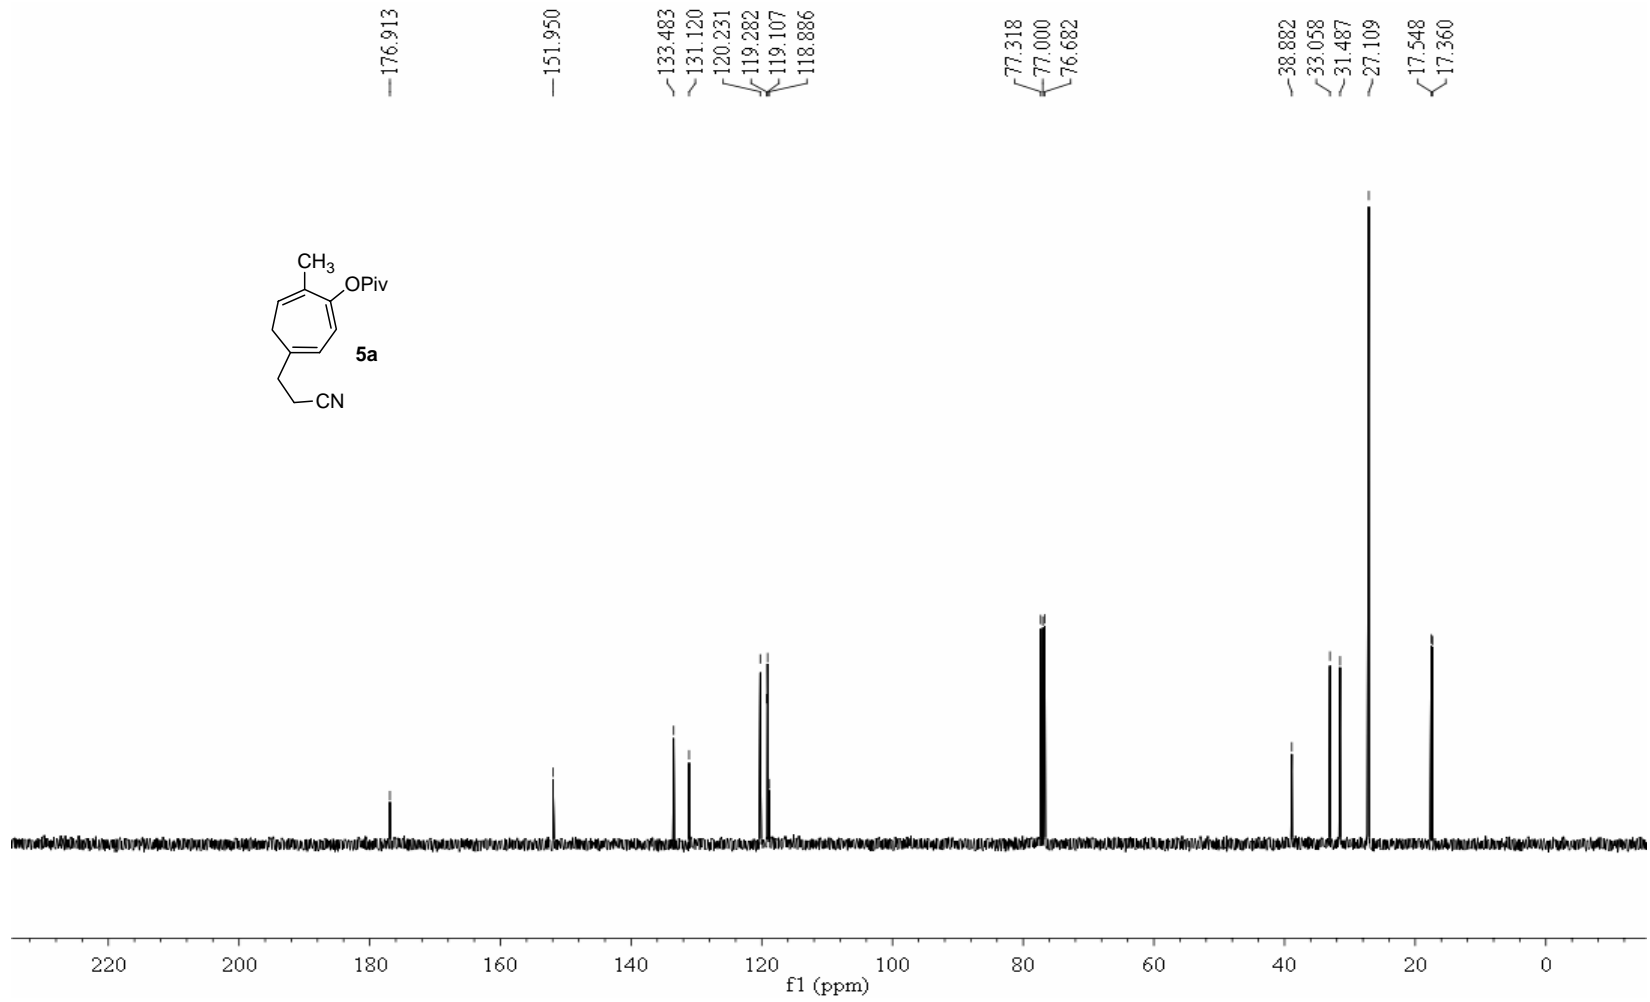

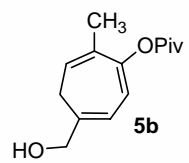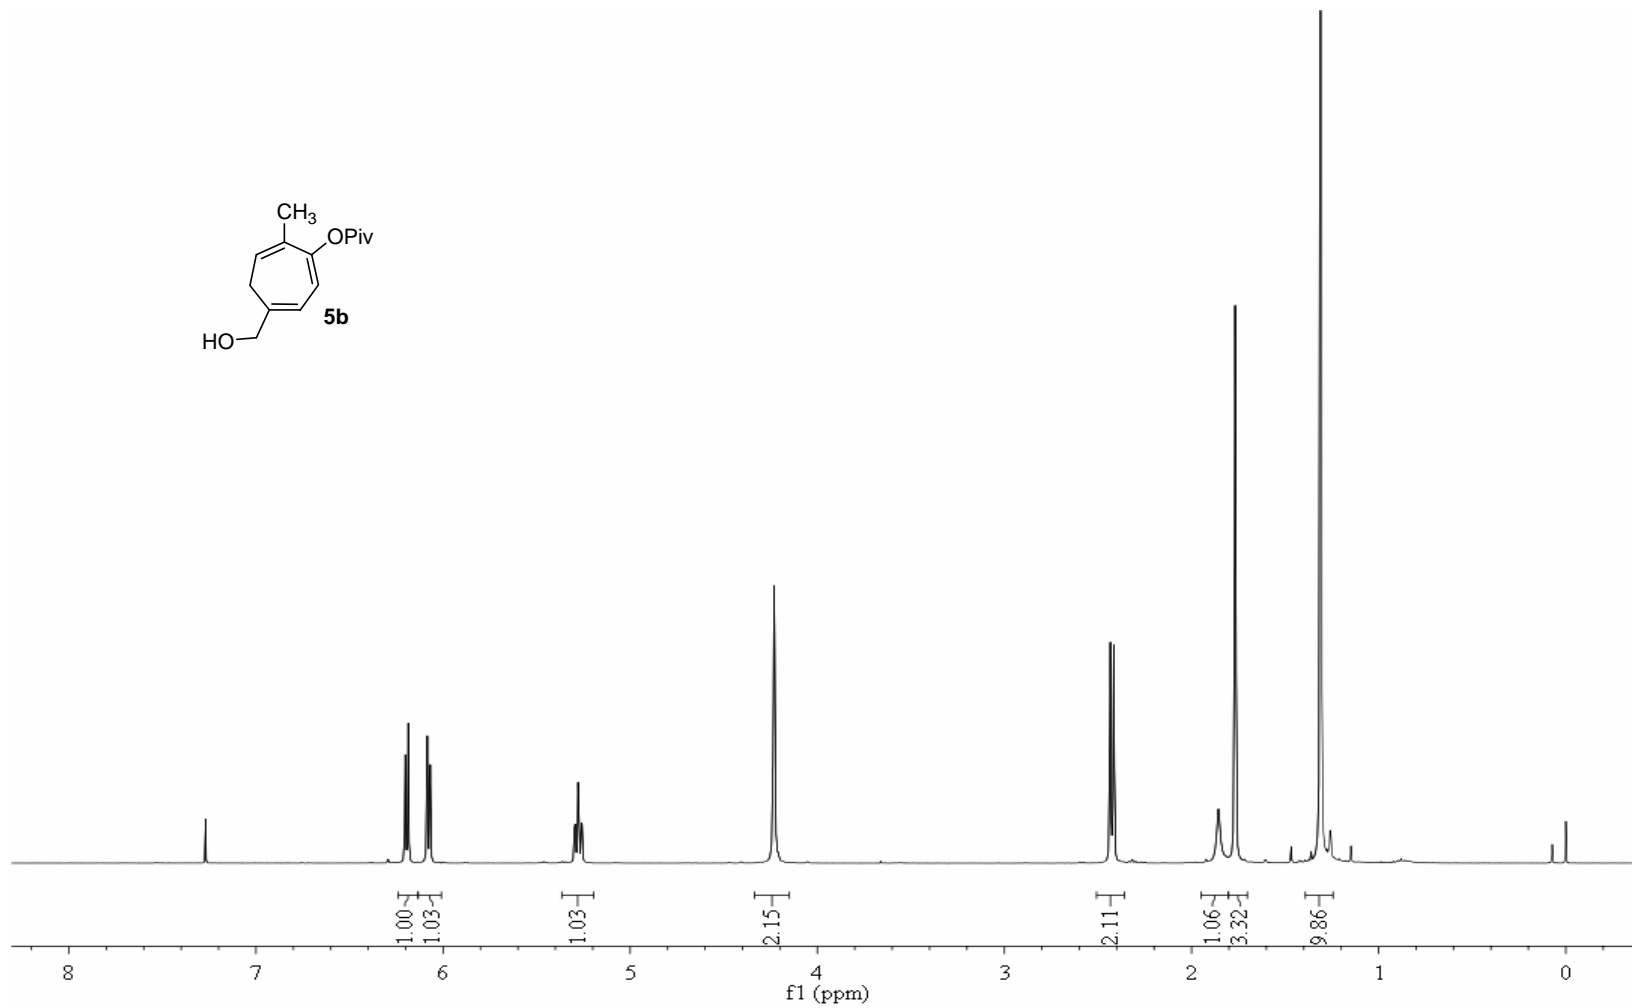

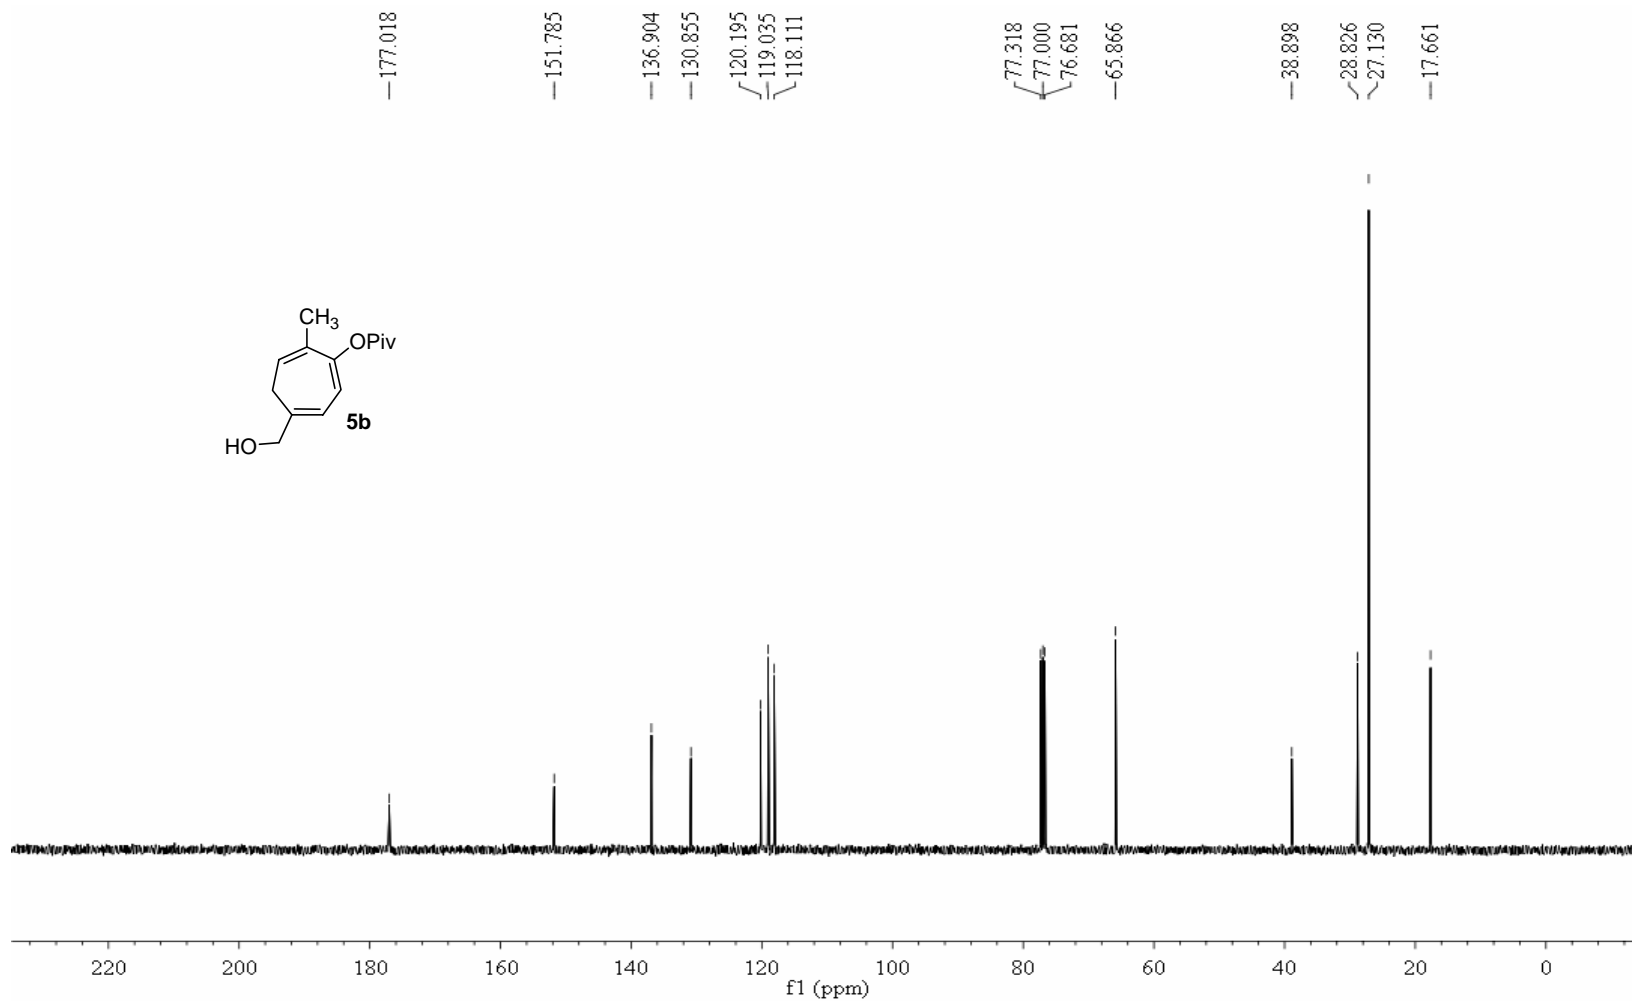

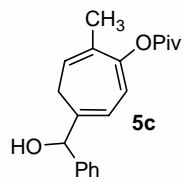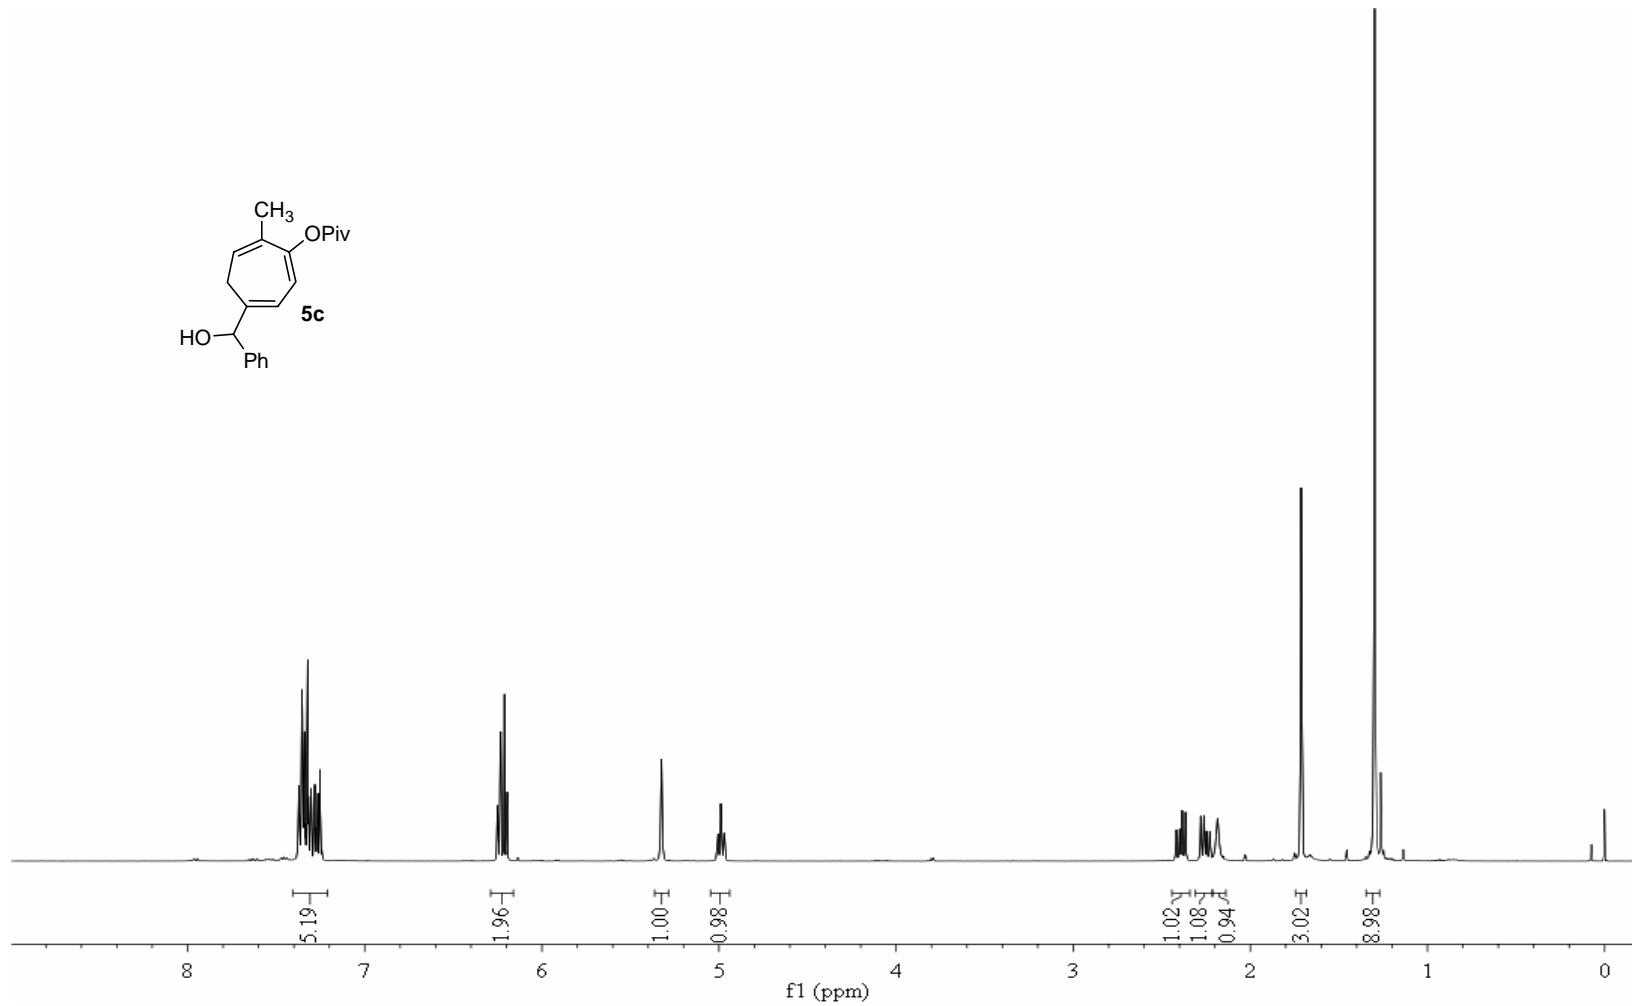

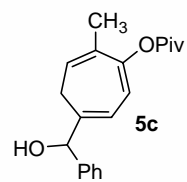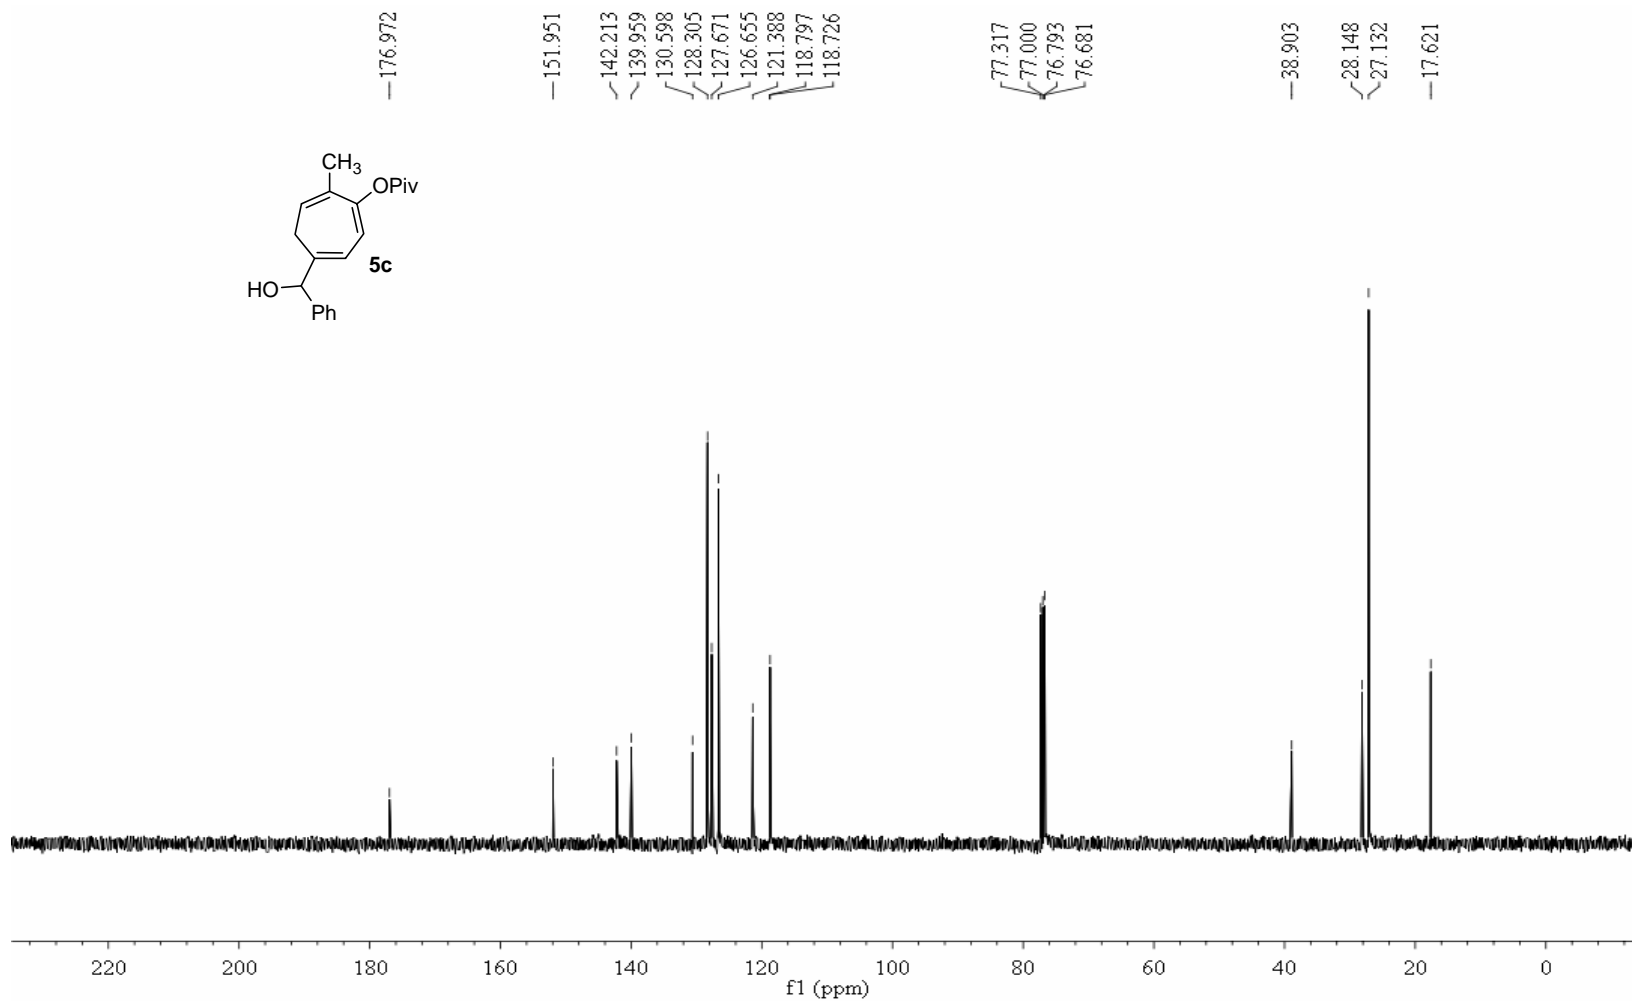



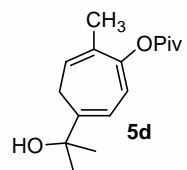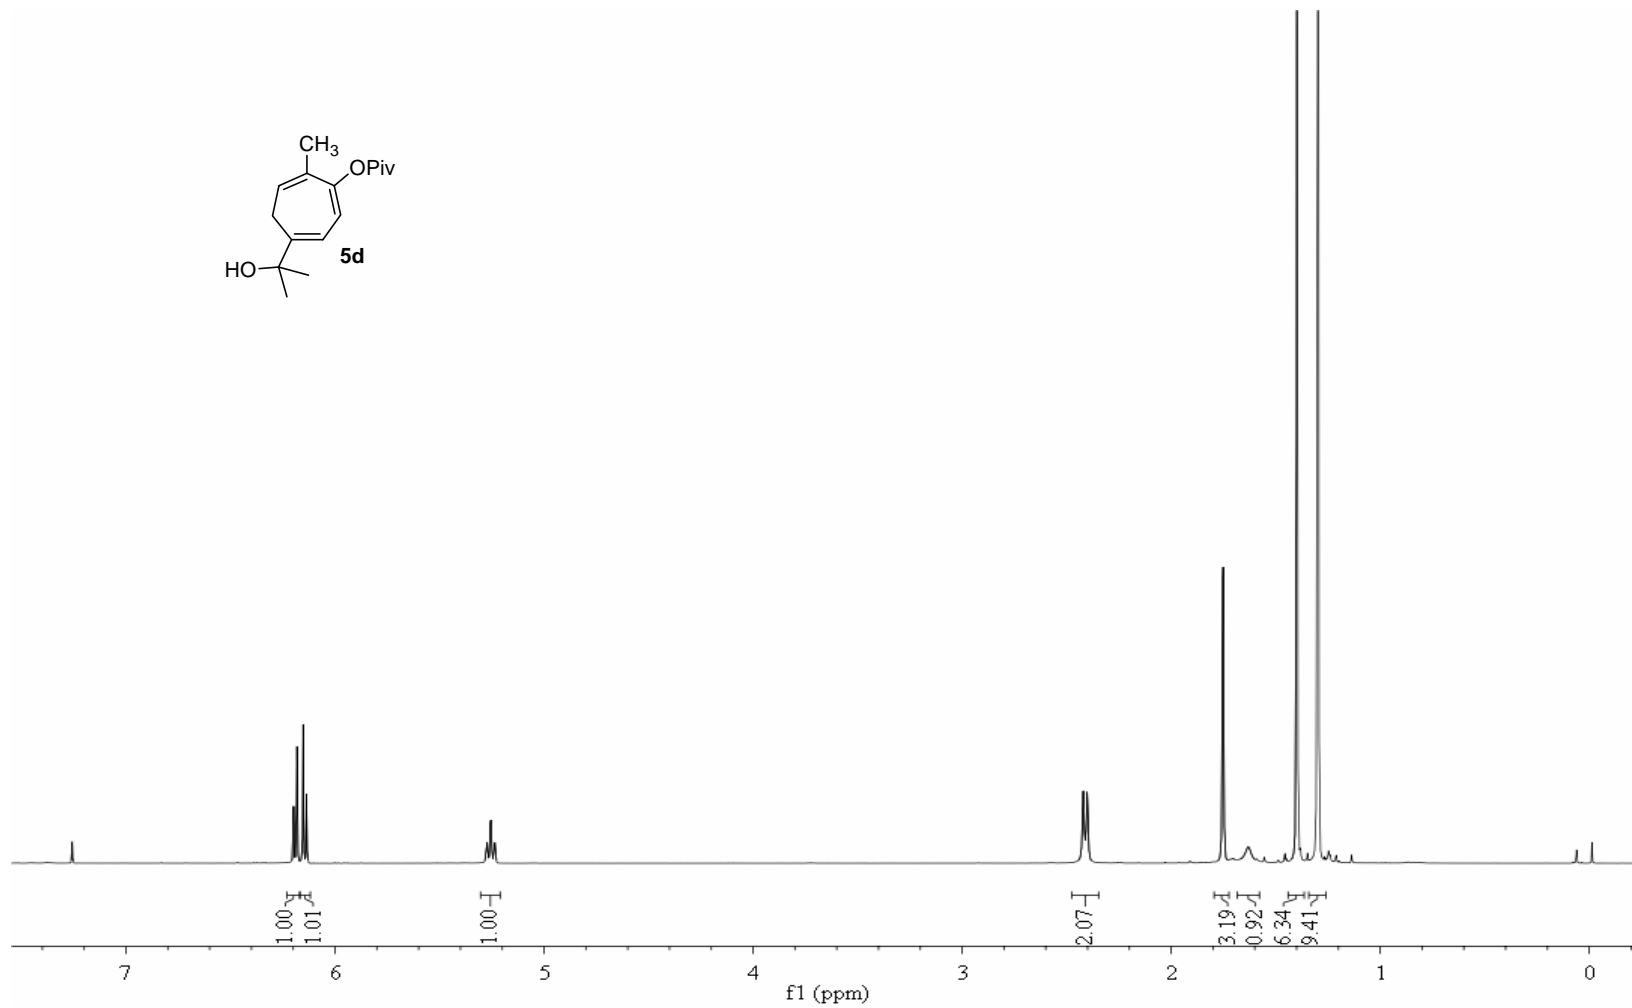

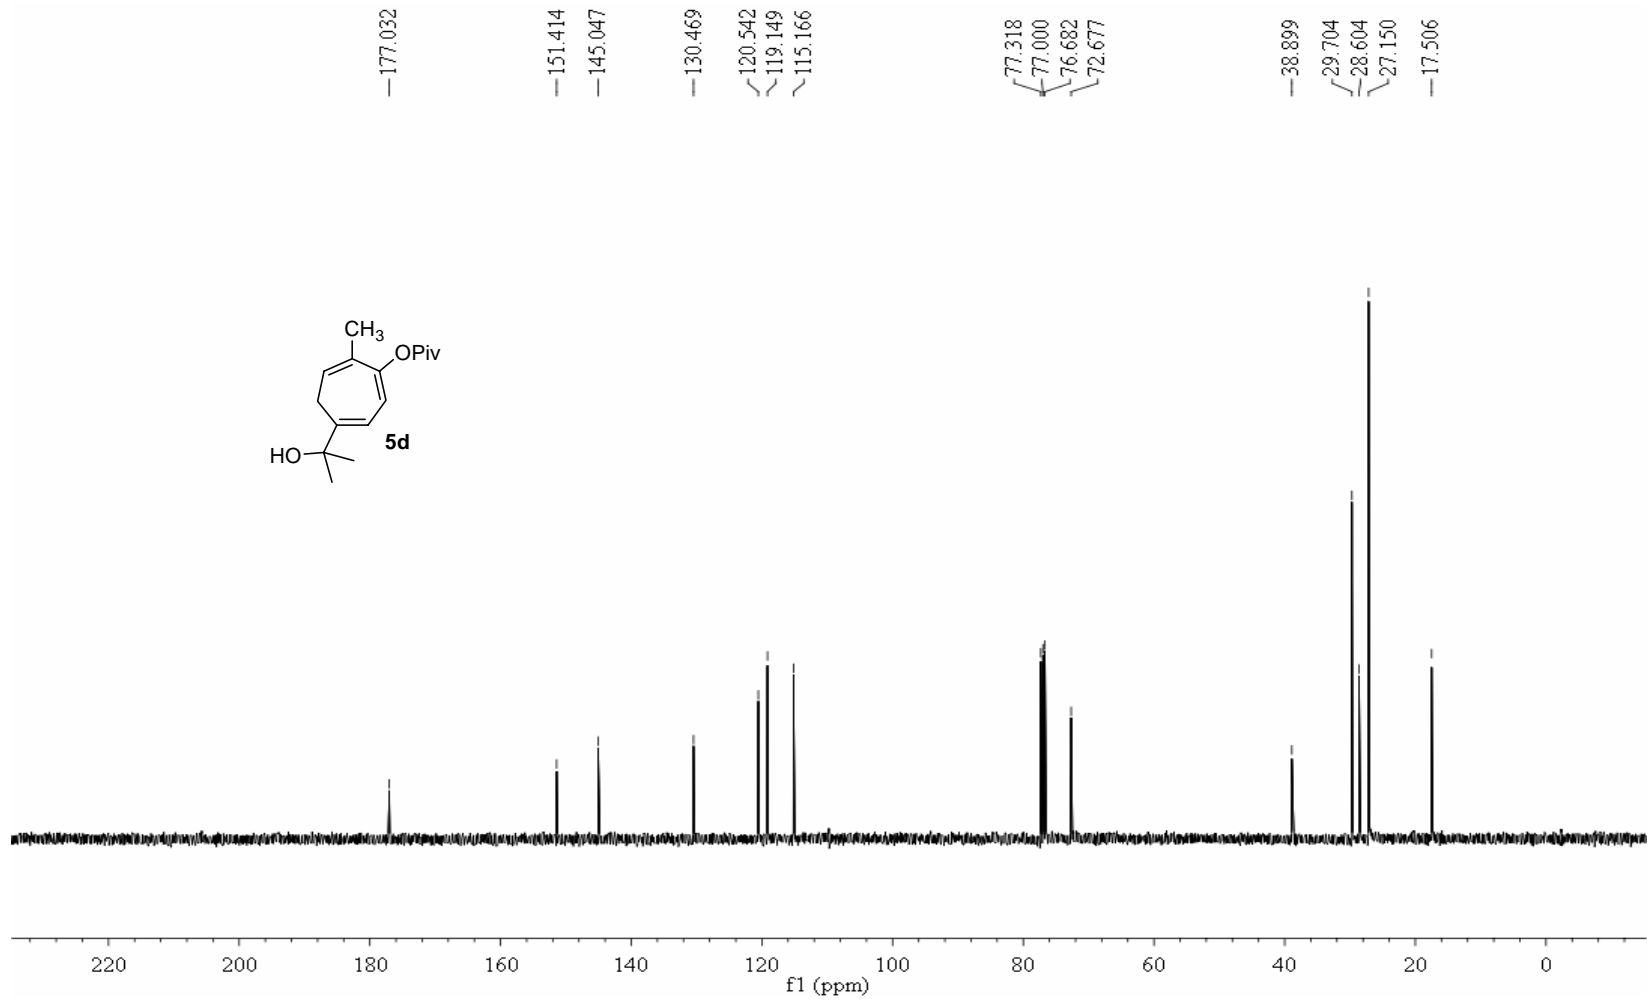

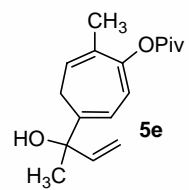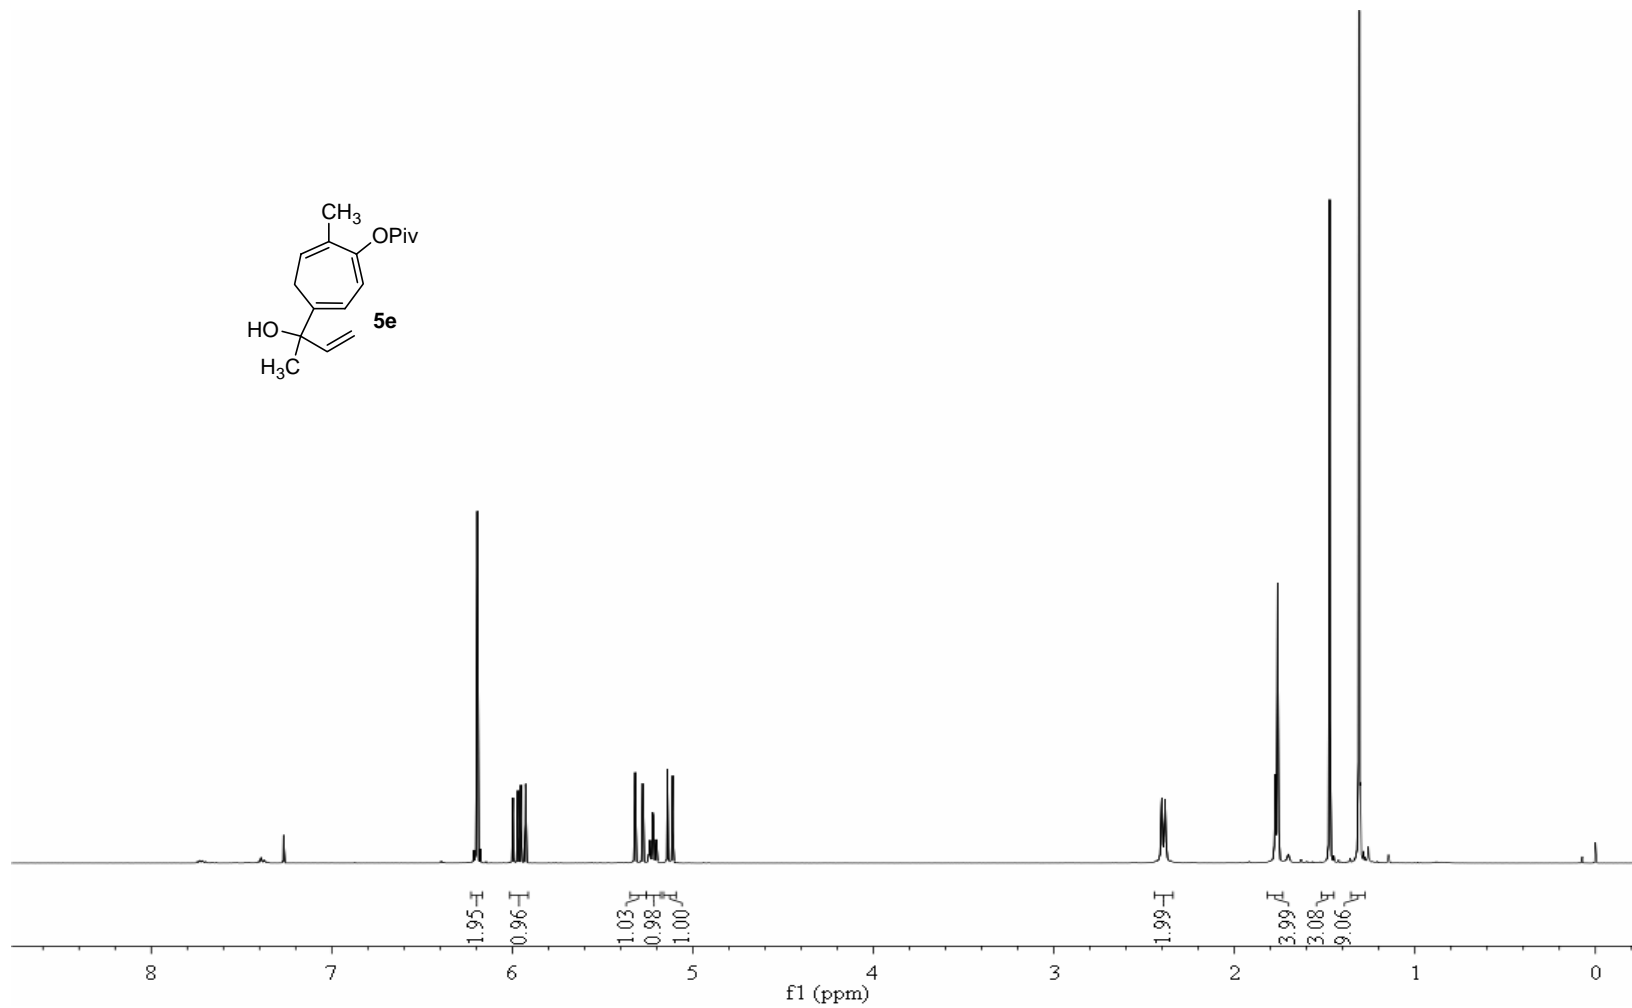

S115

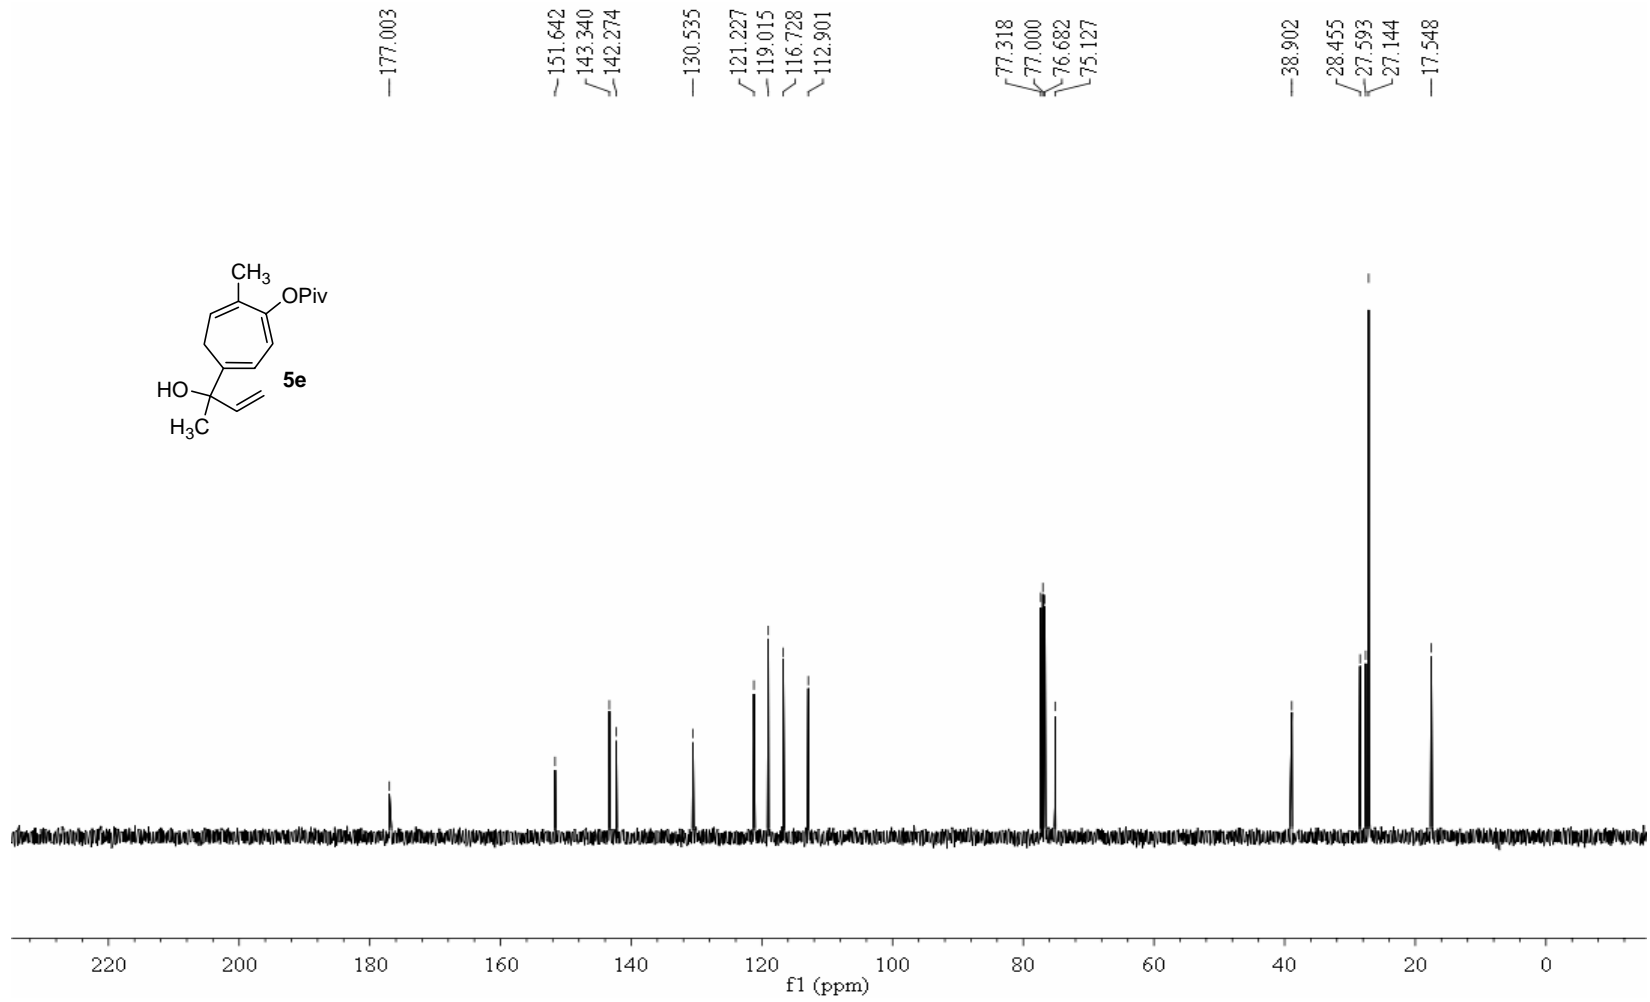

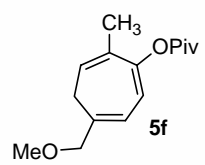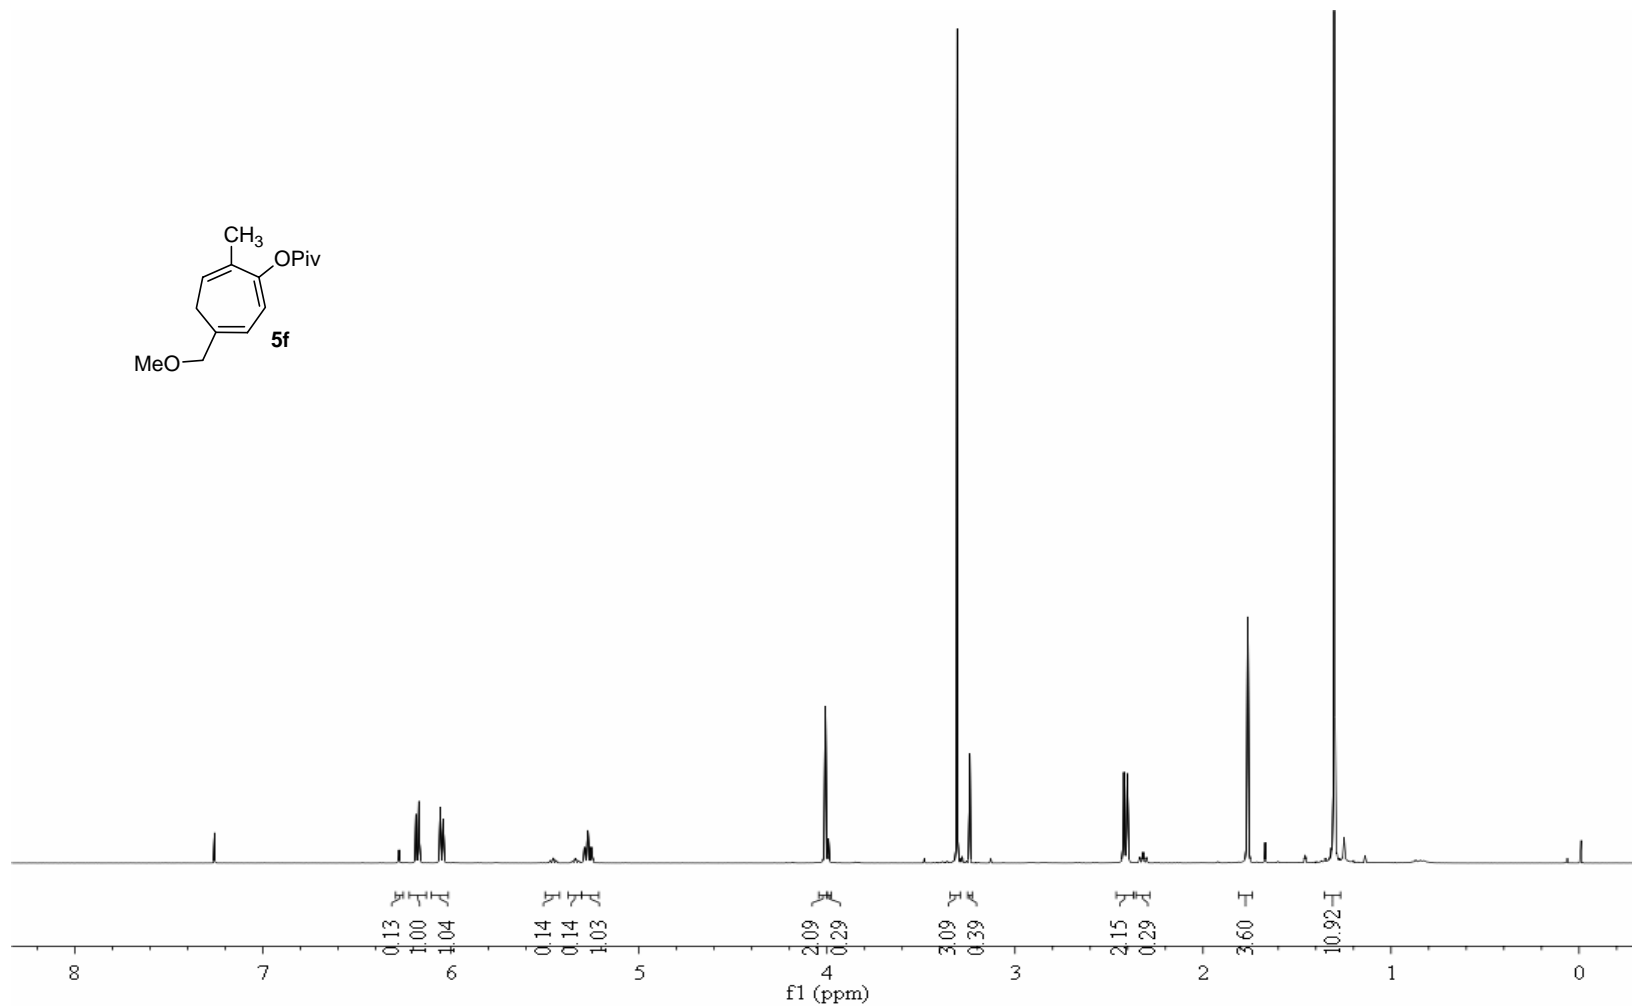

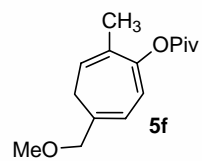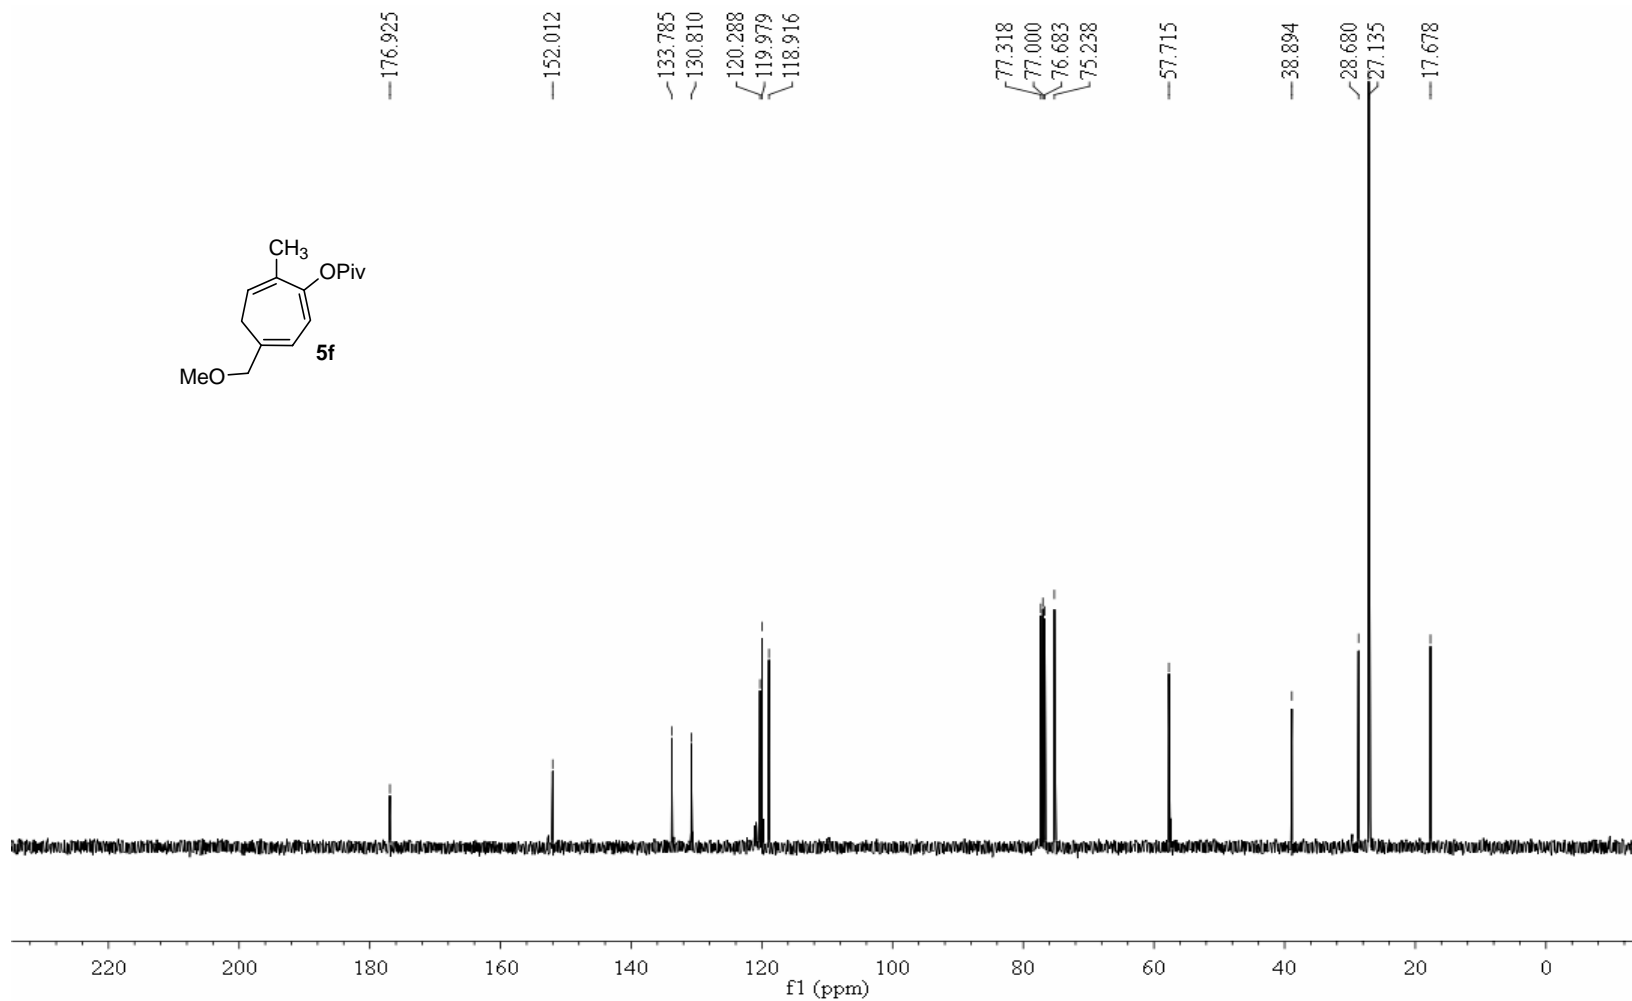

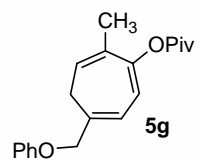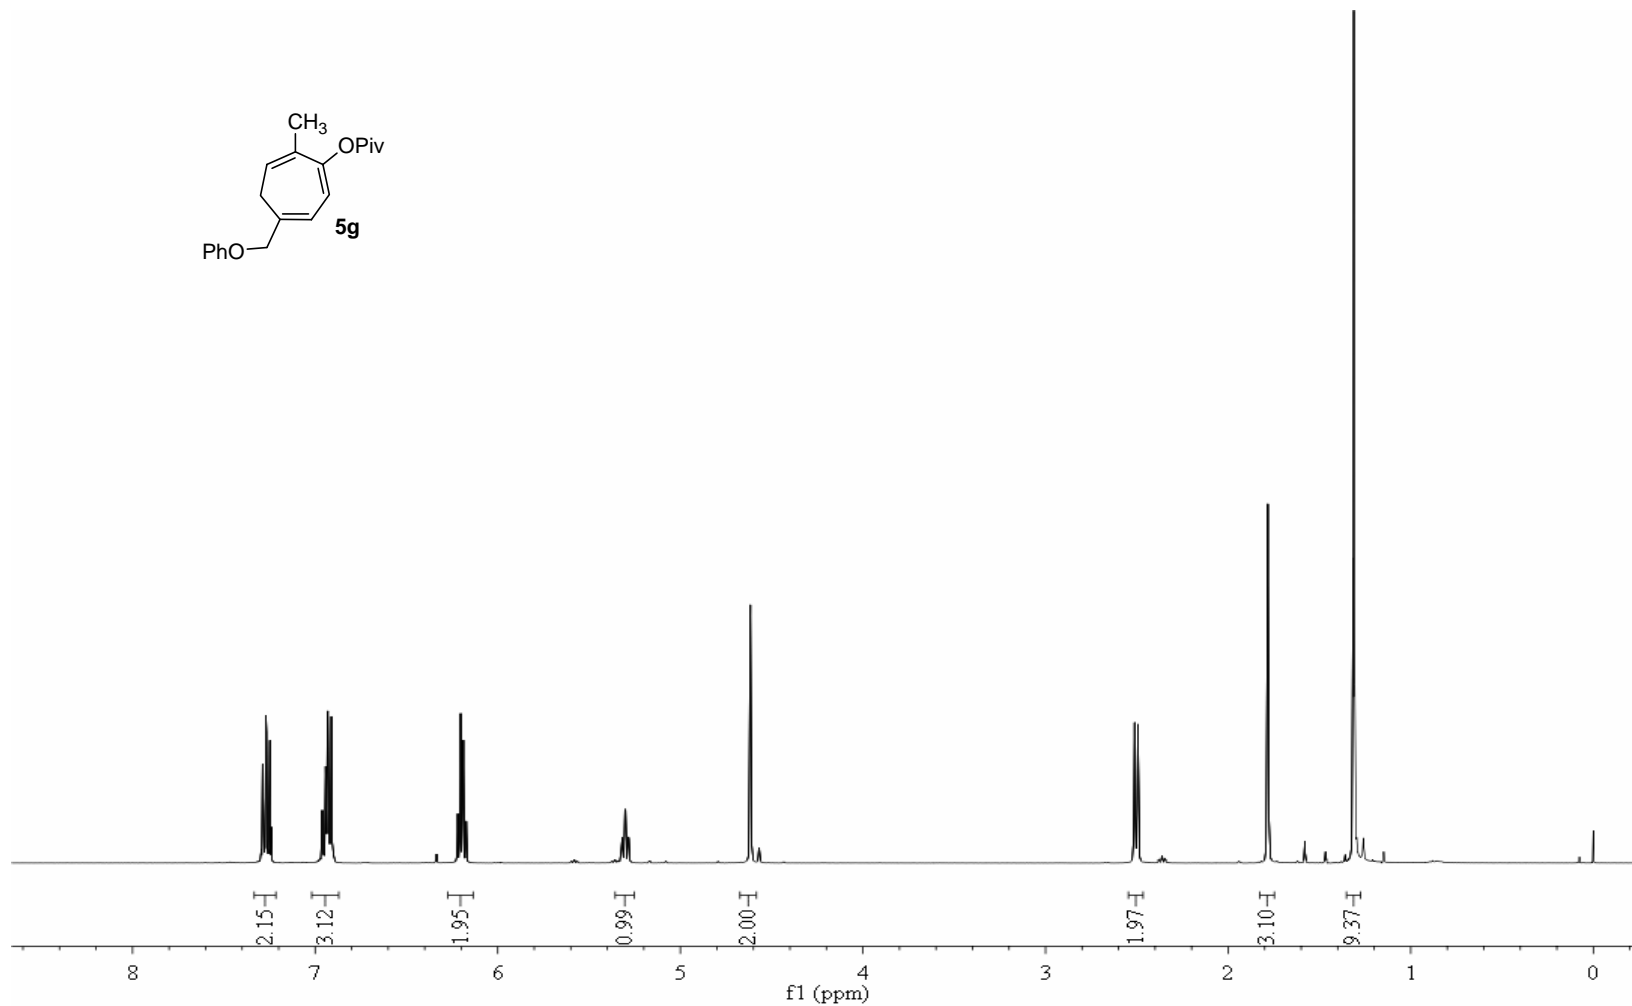

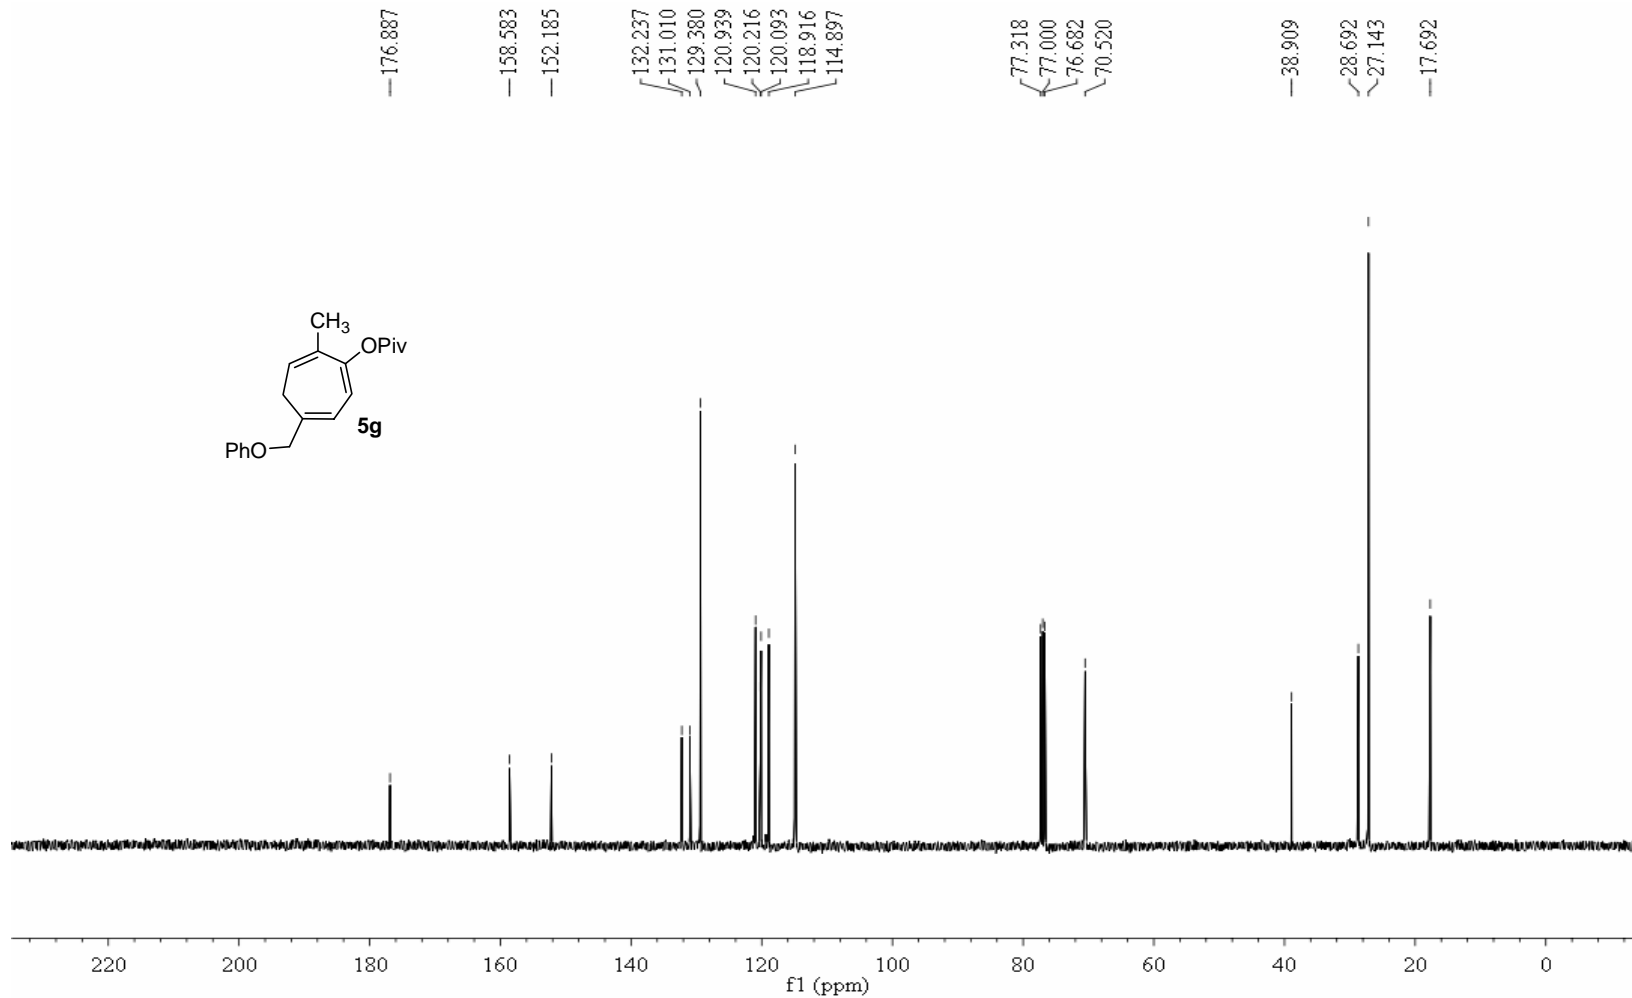



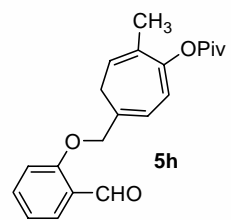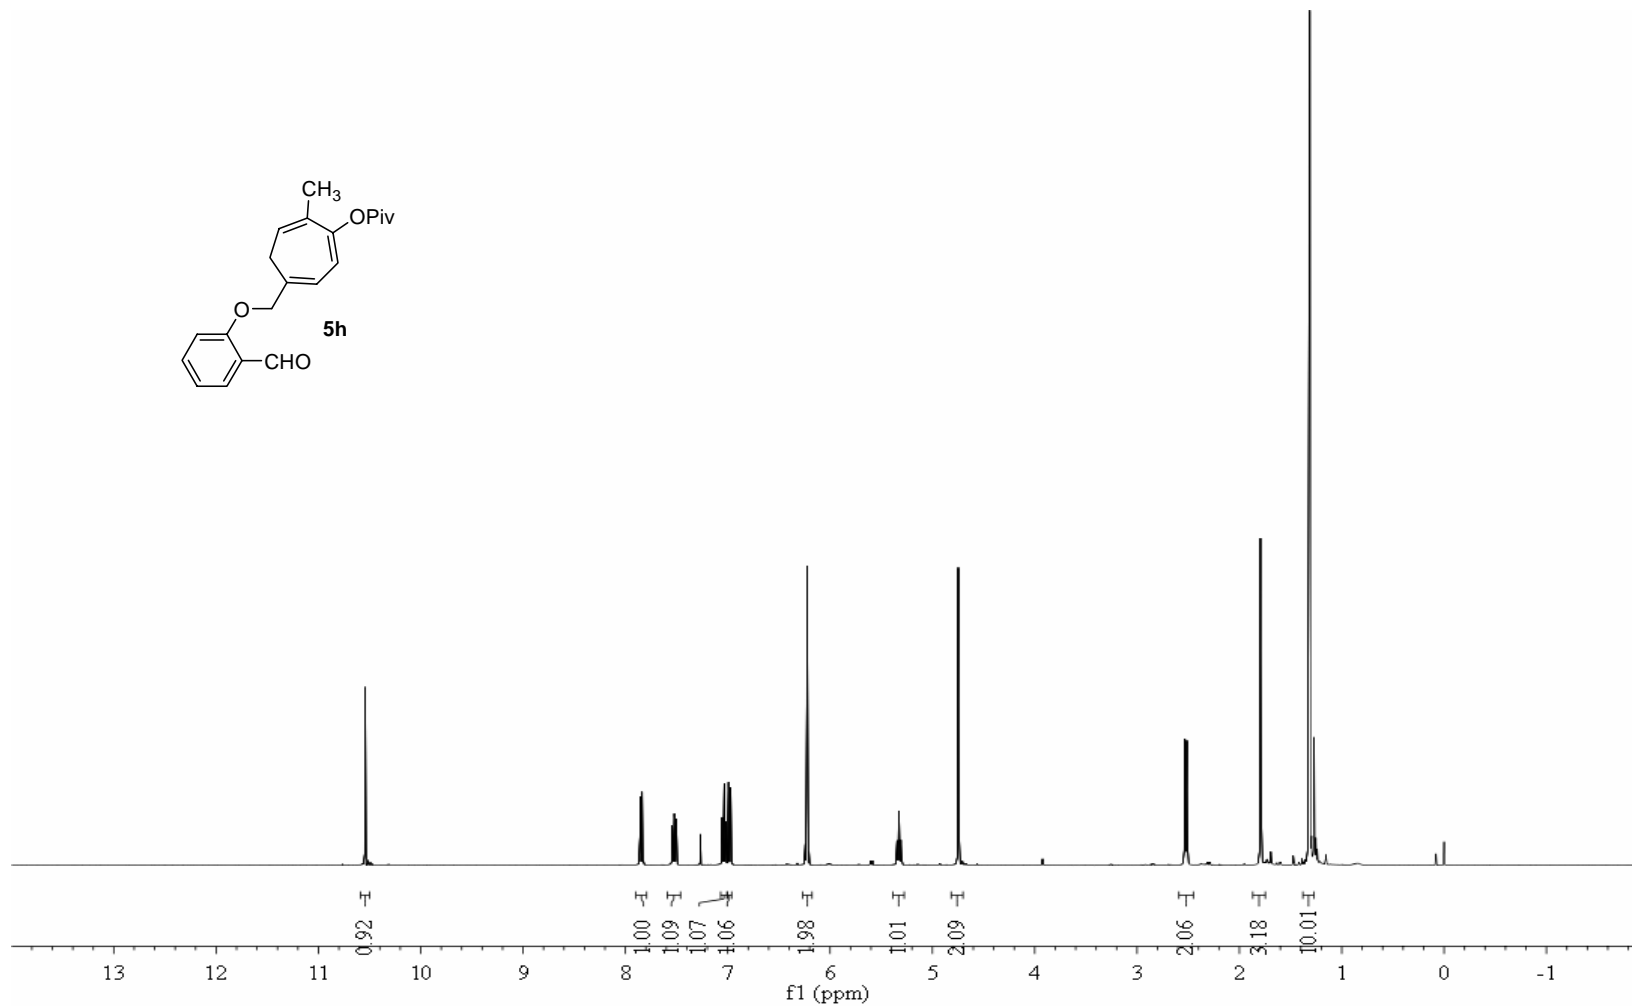

S121

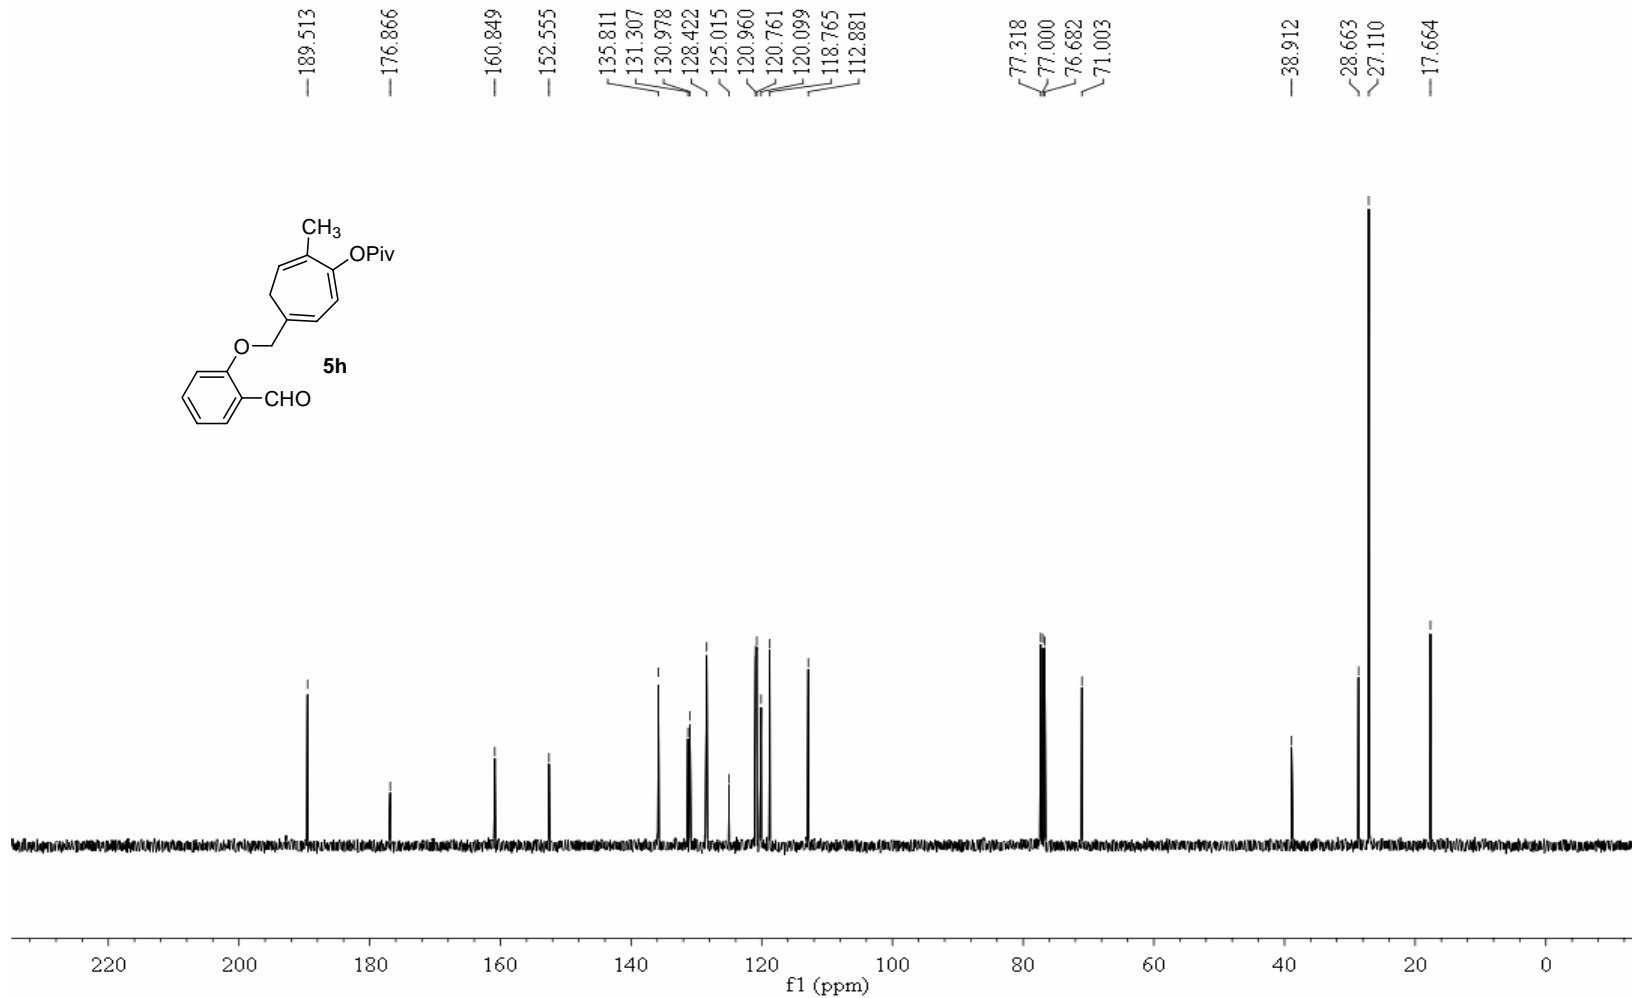

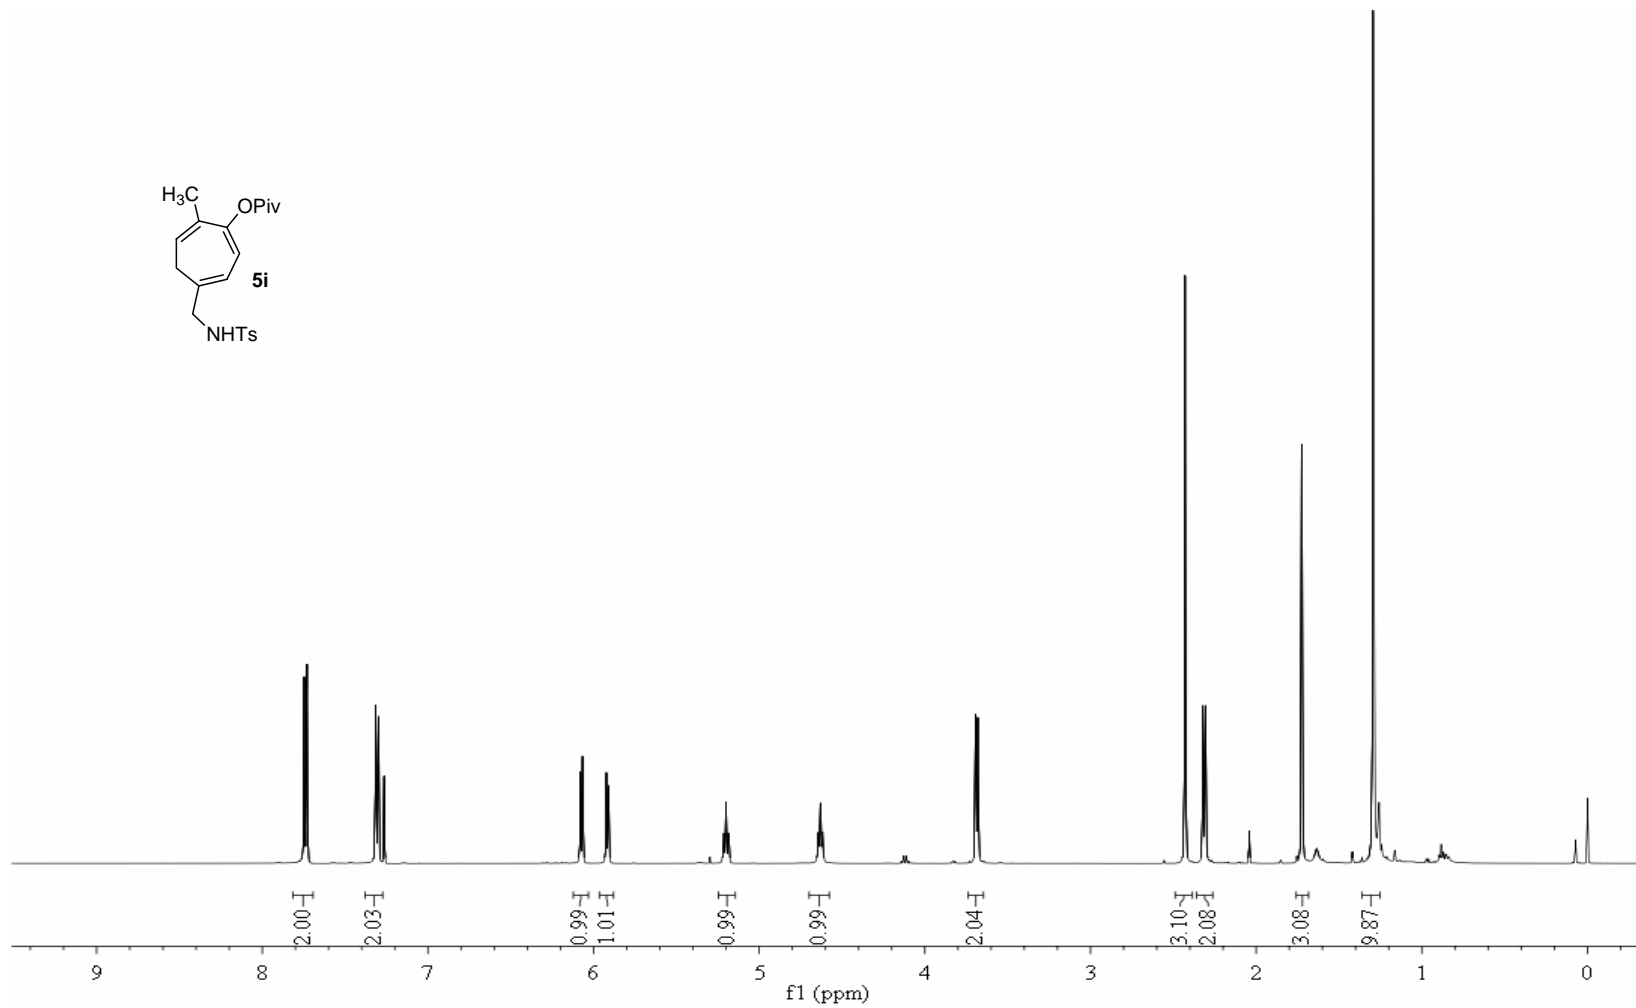

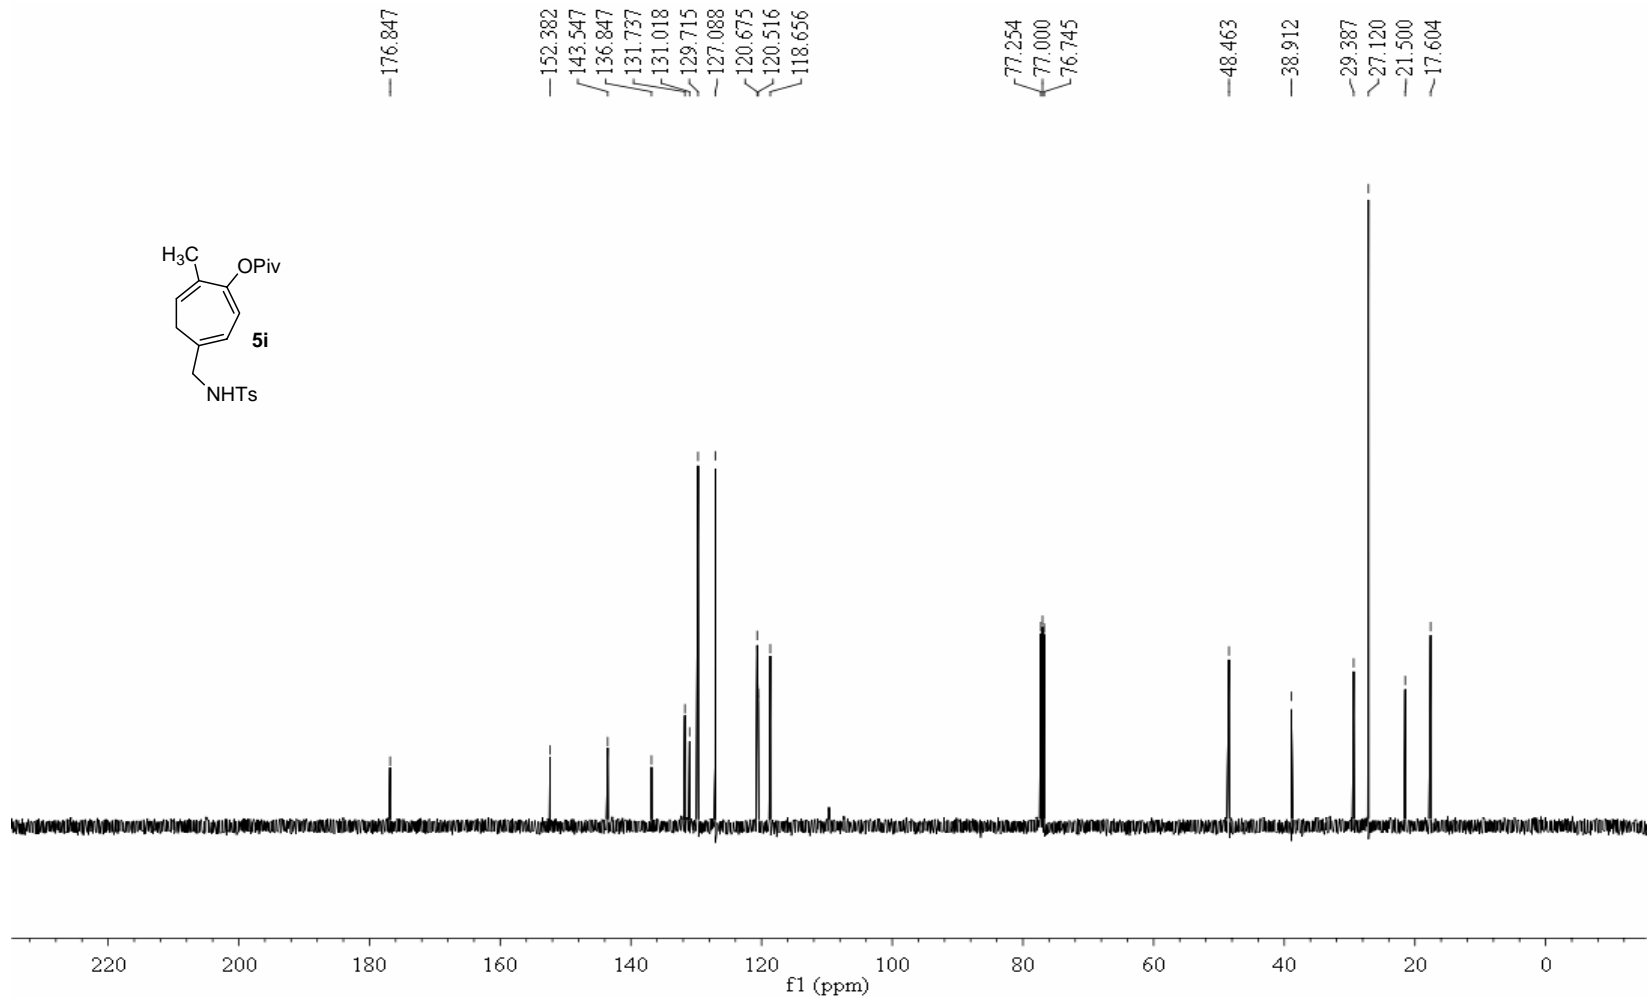

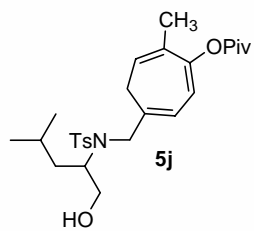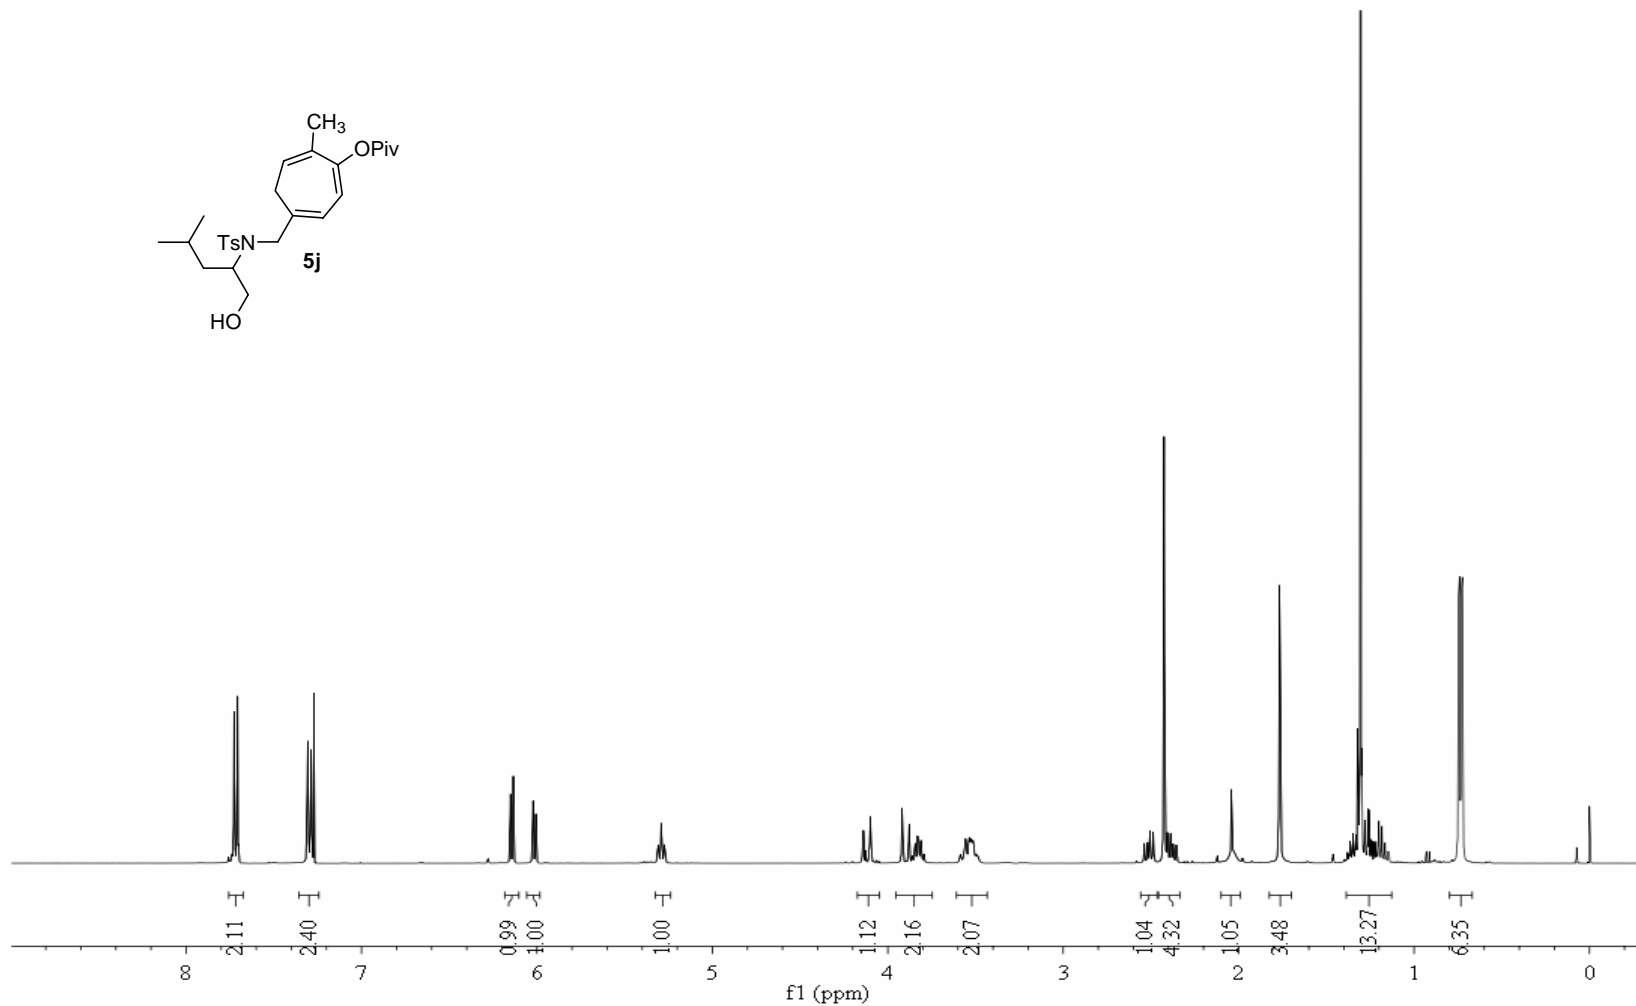

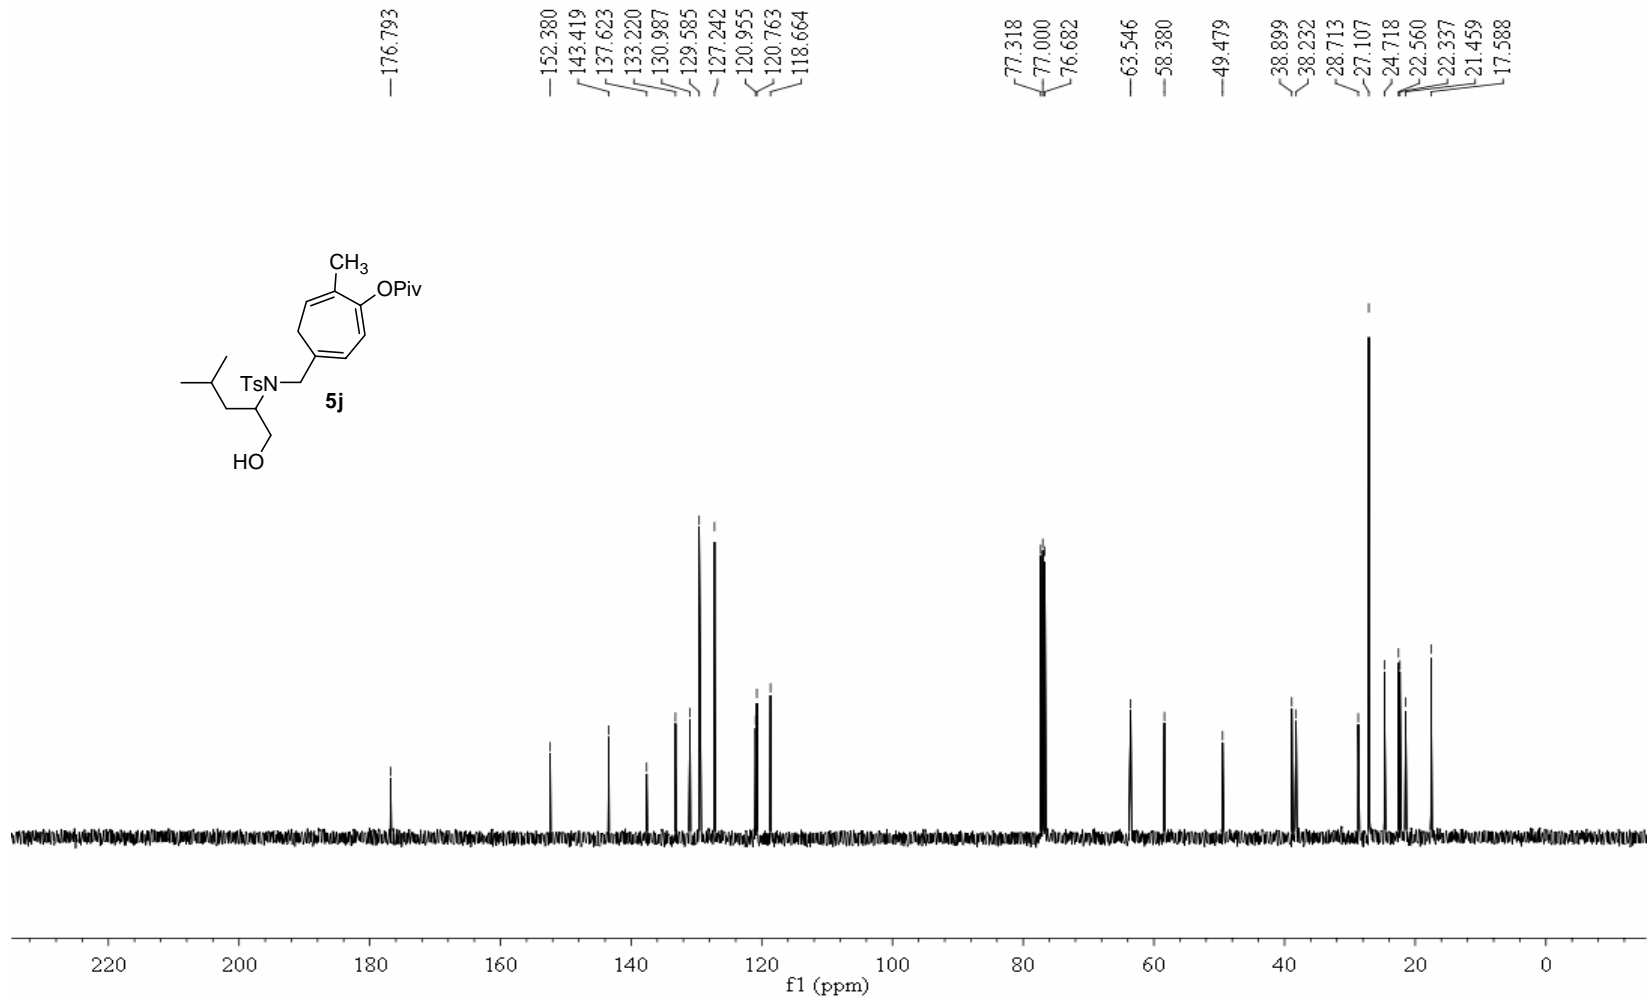

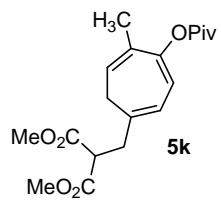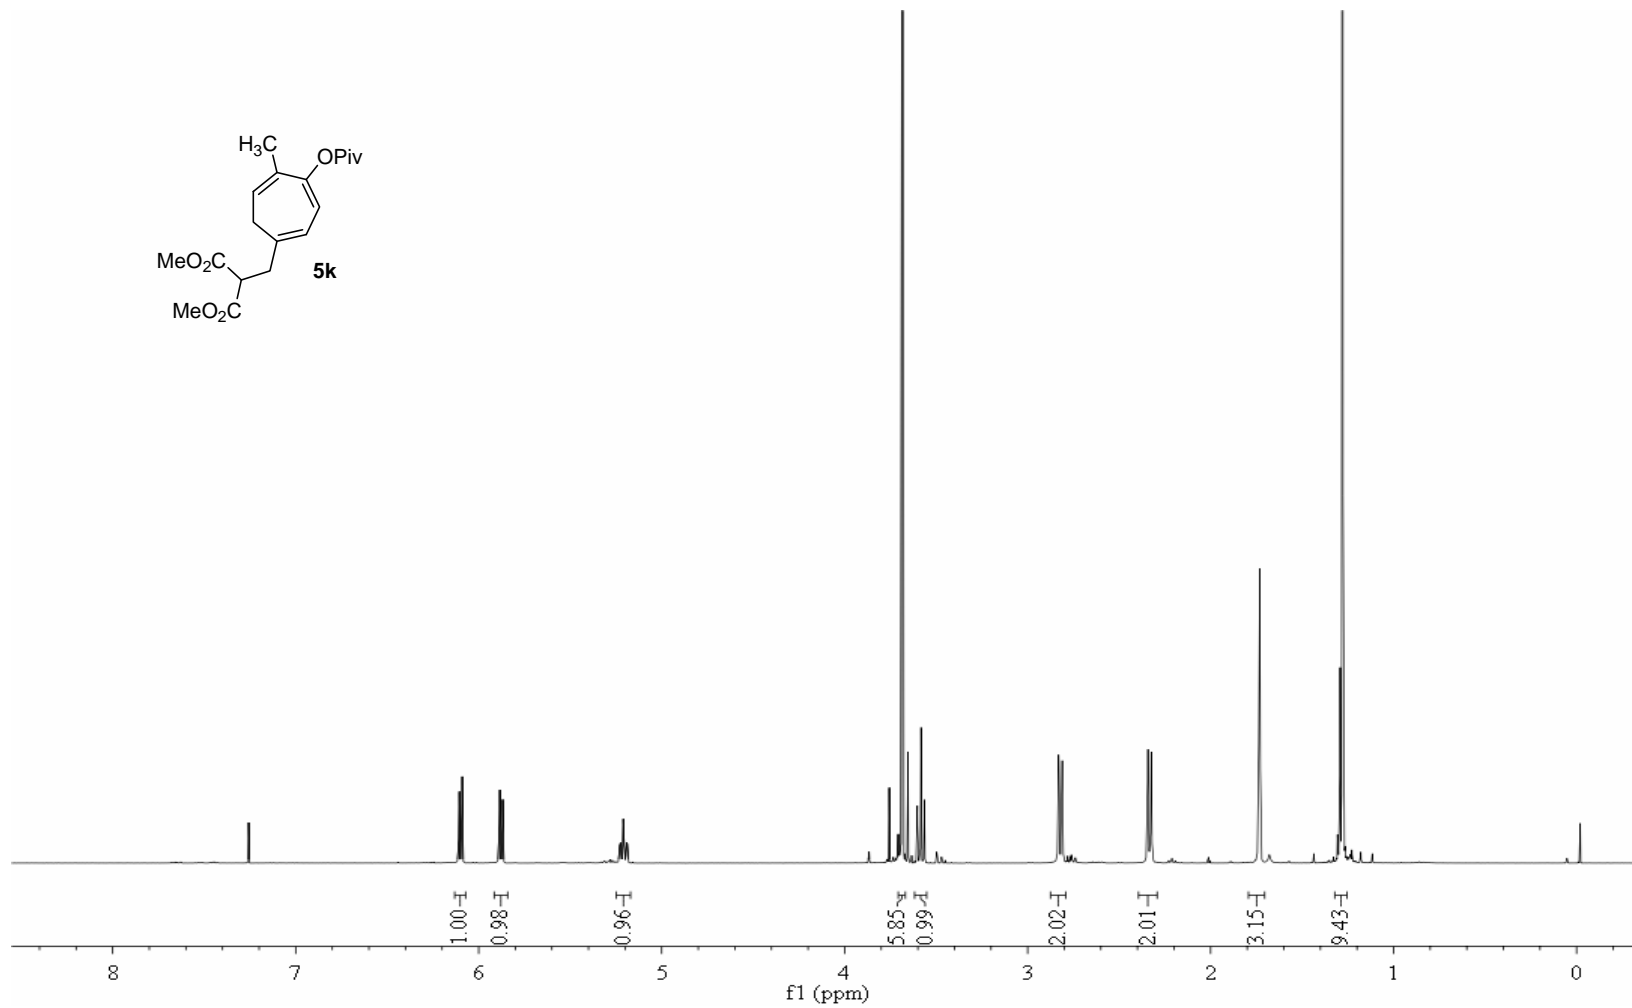

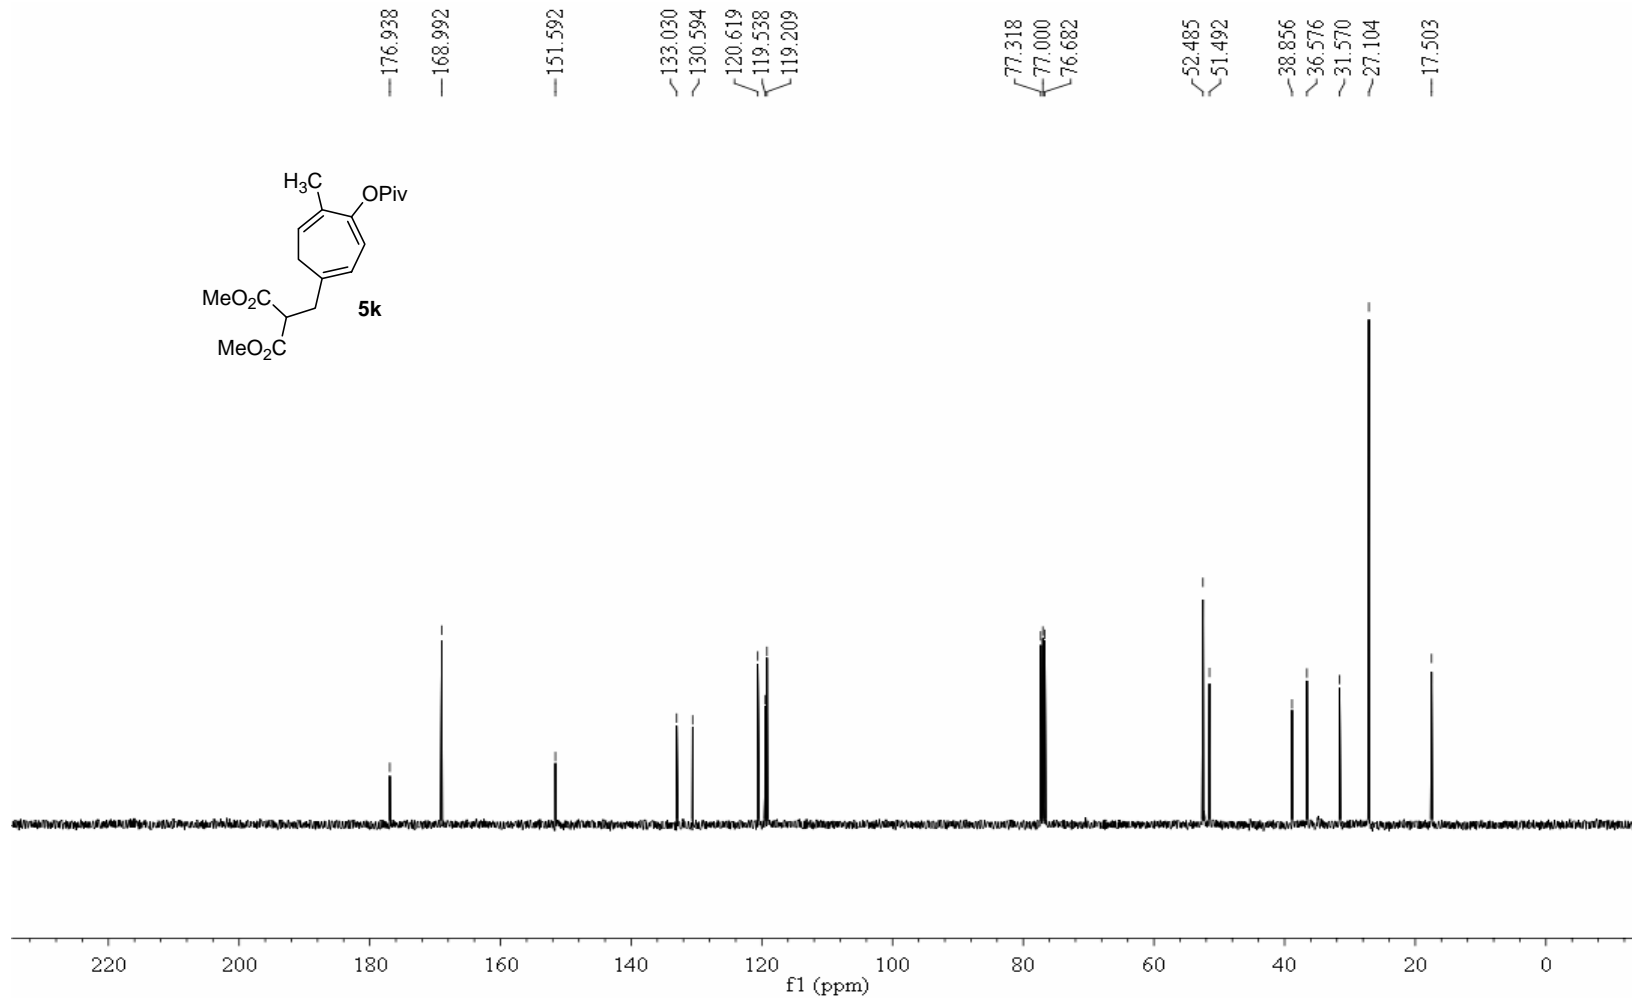



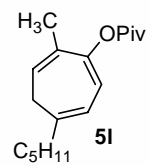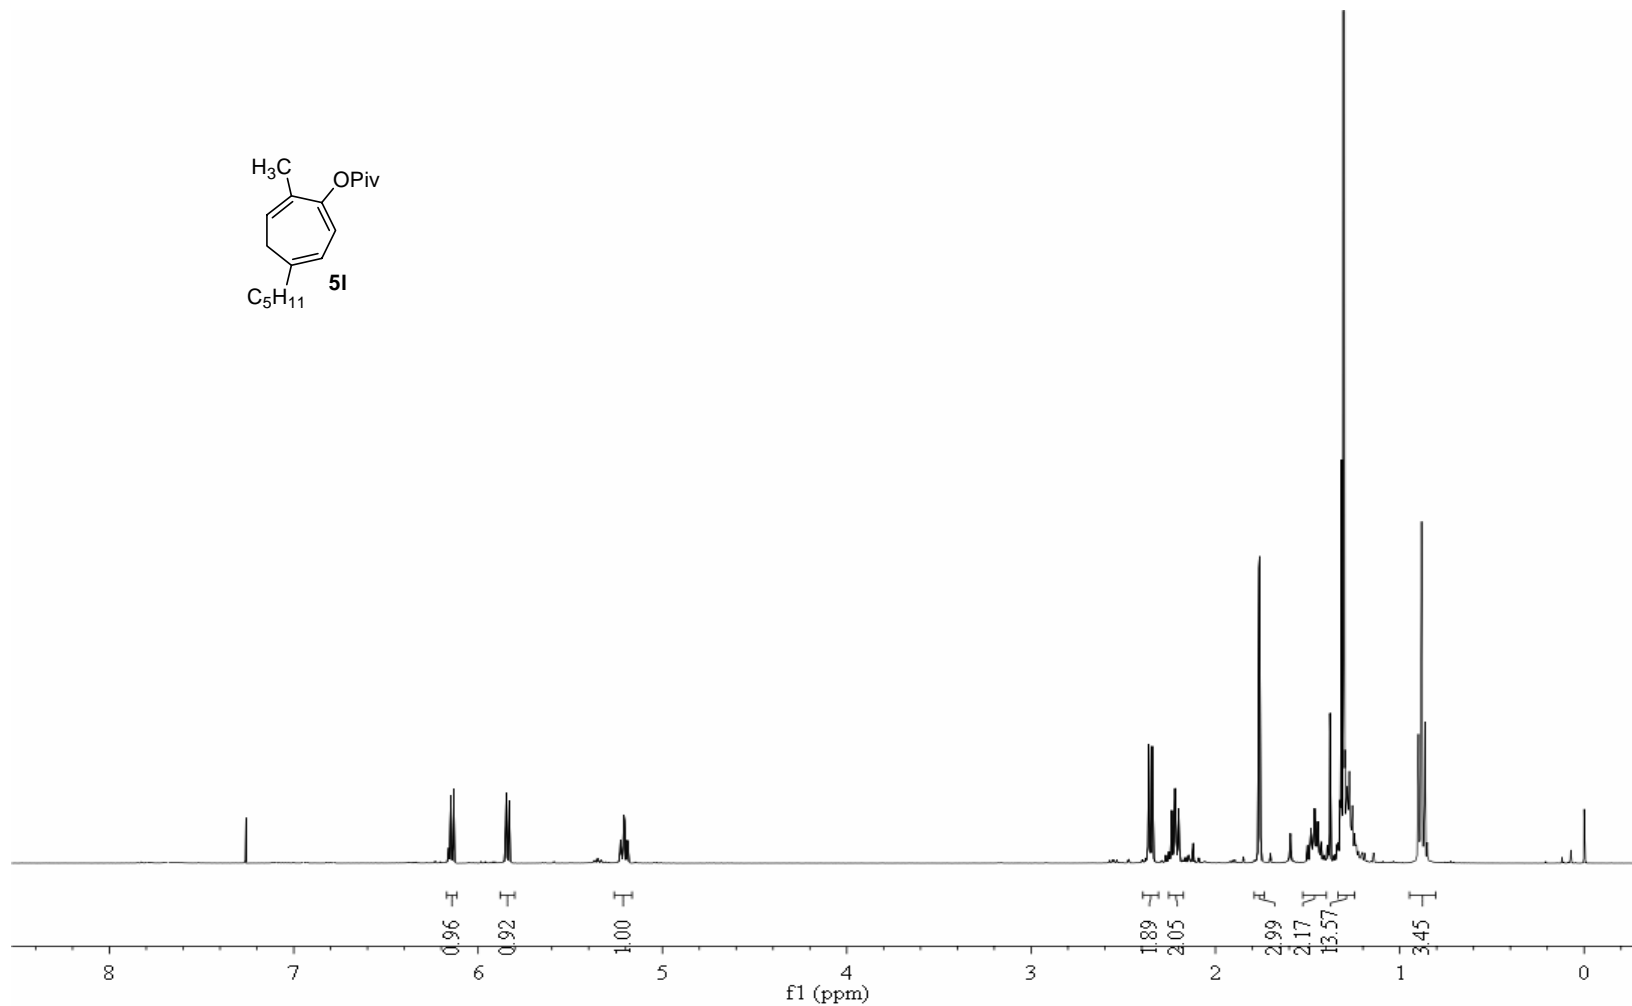

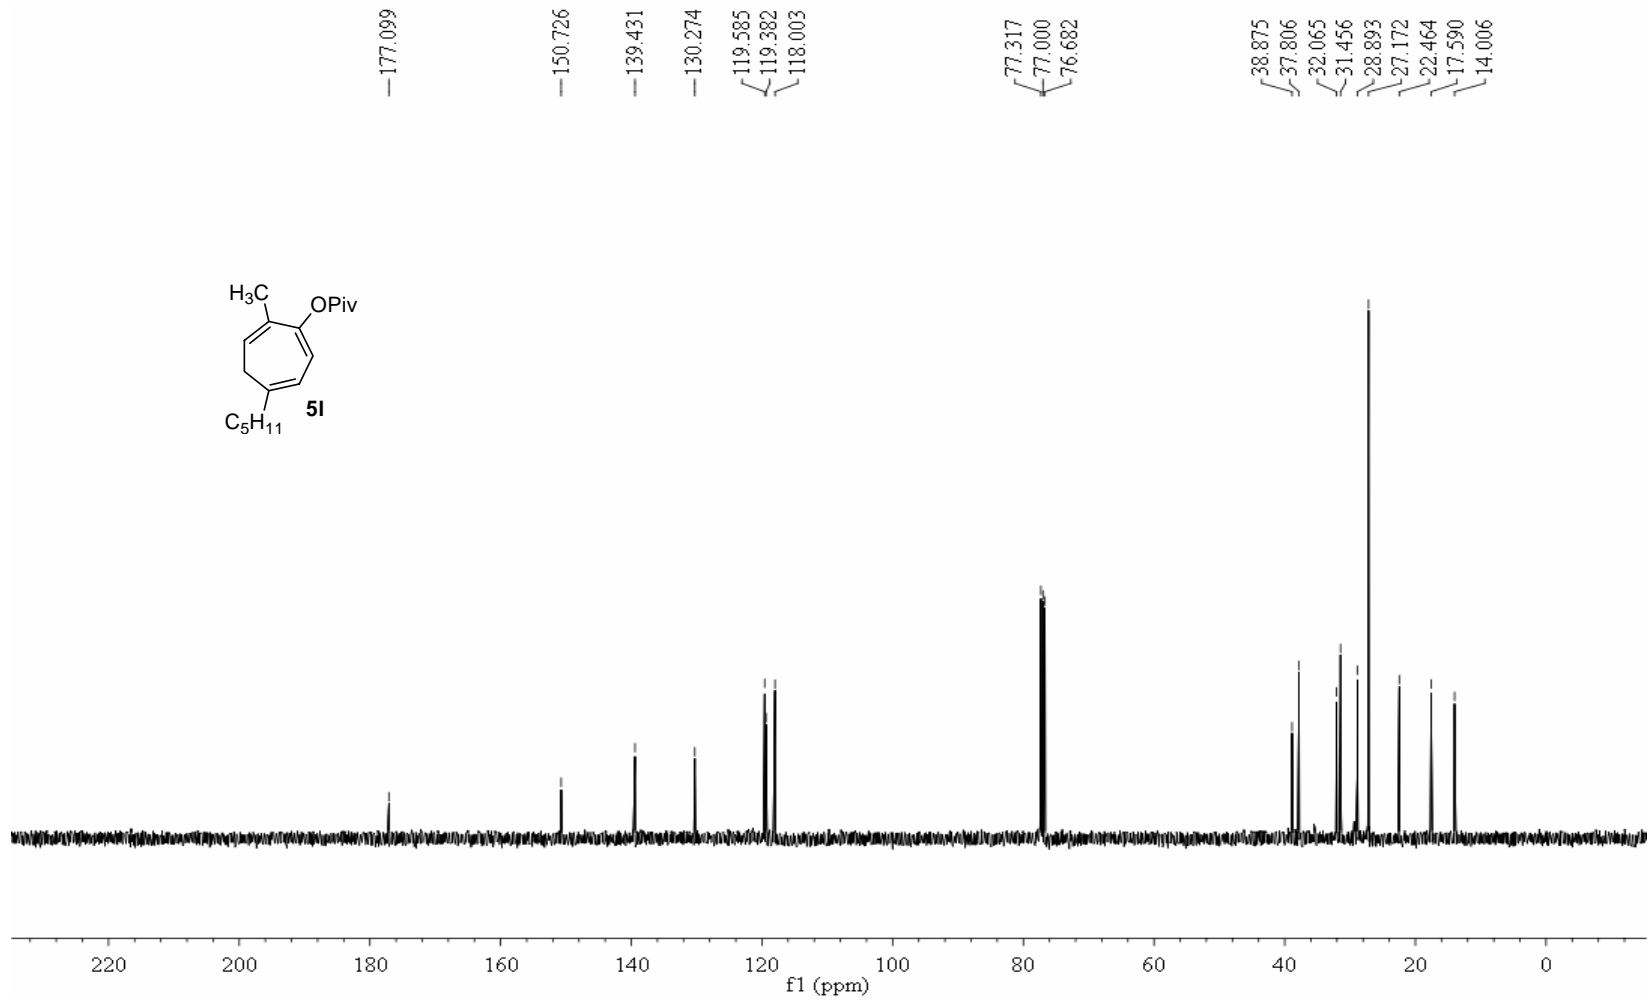

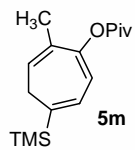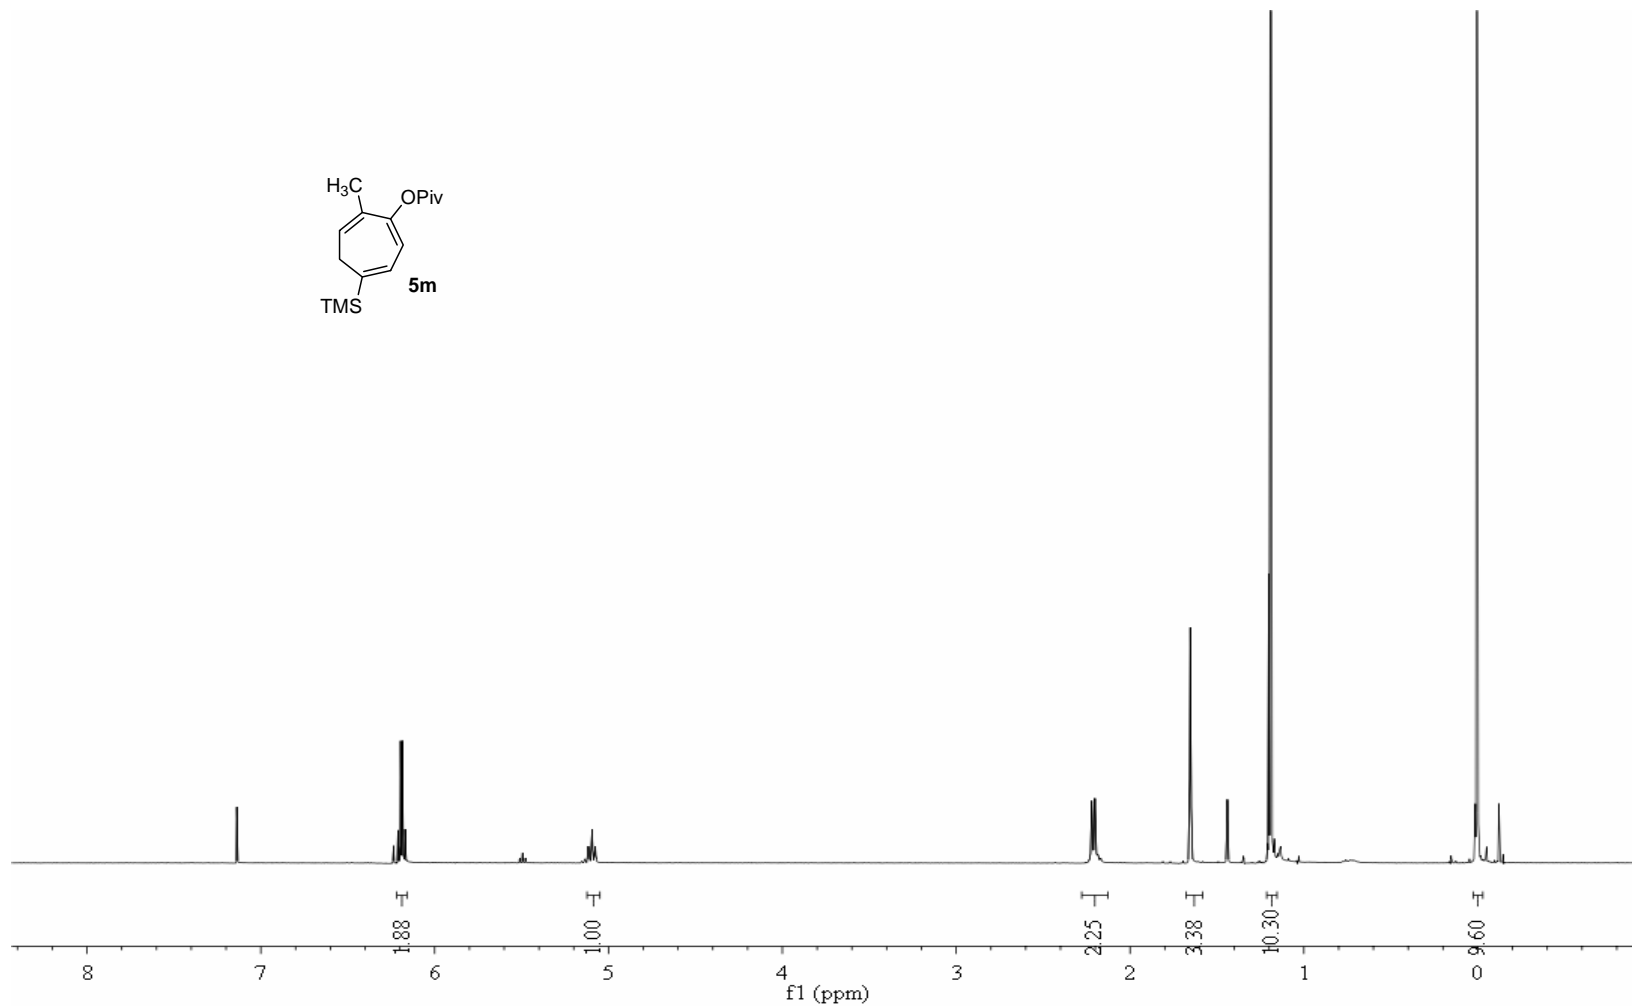

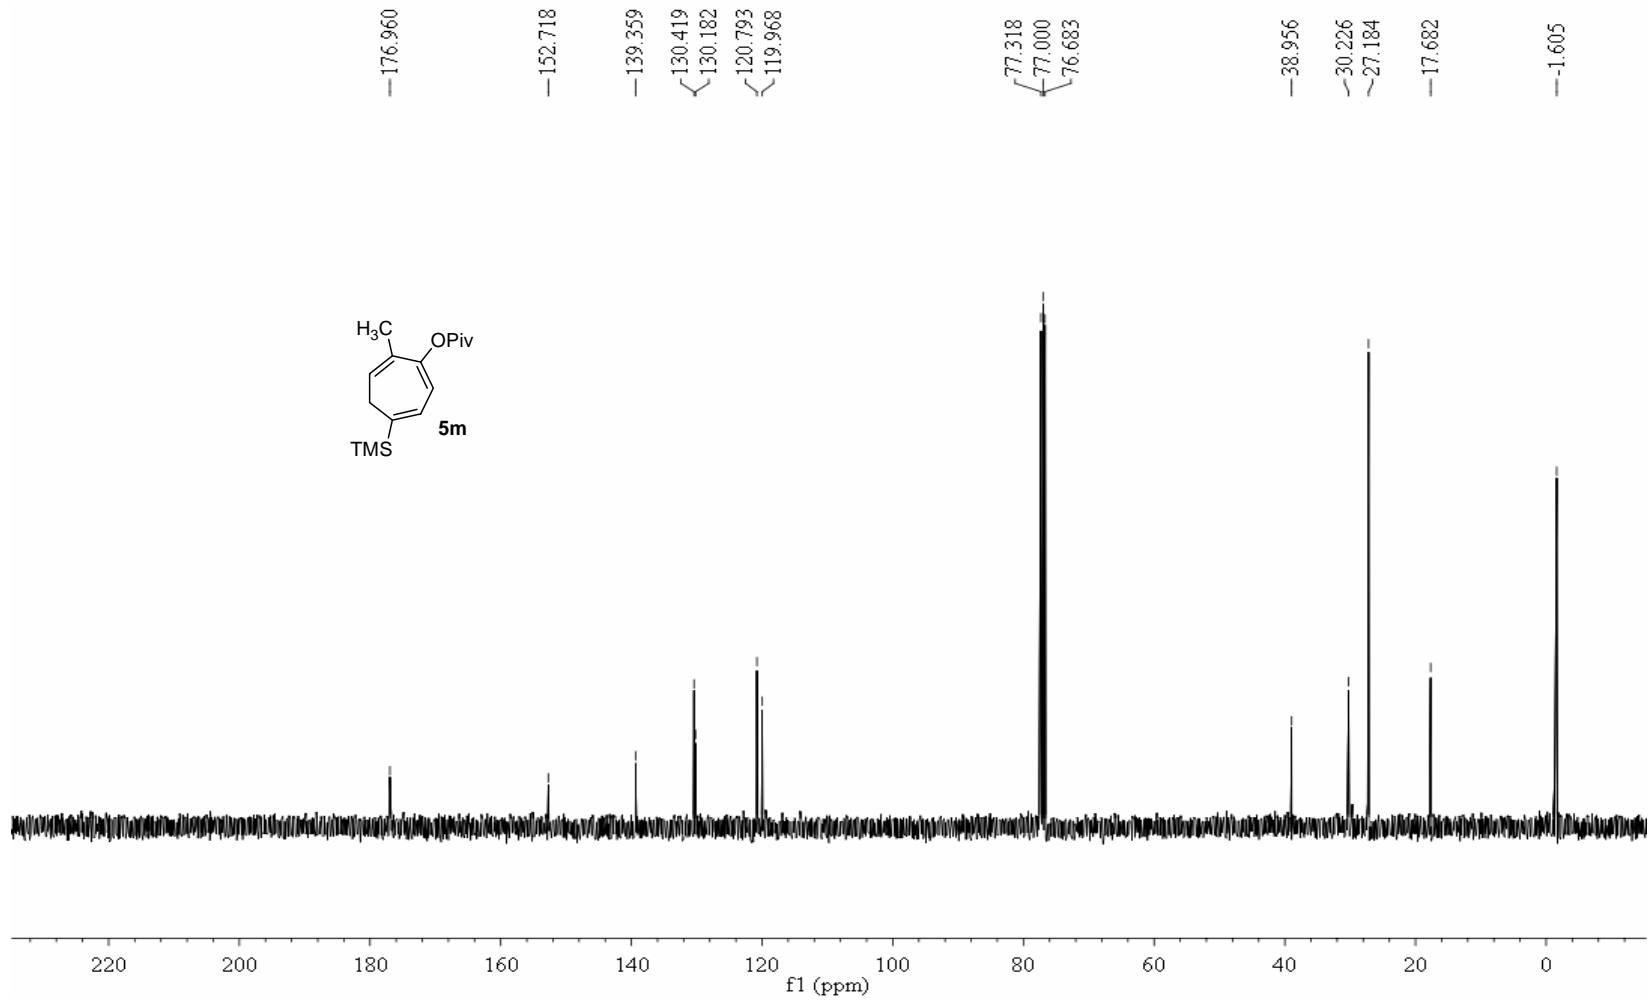

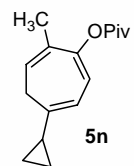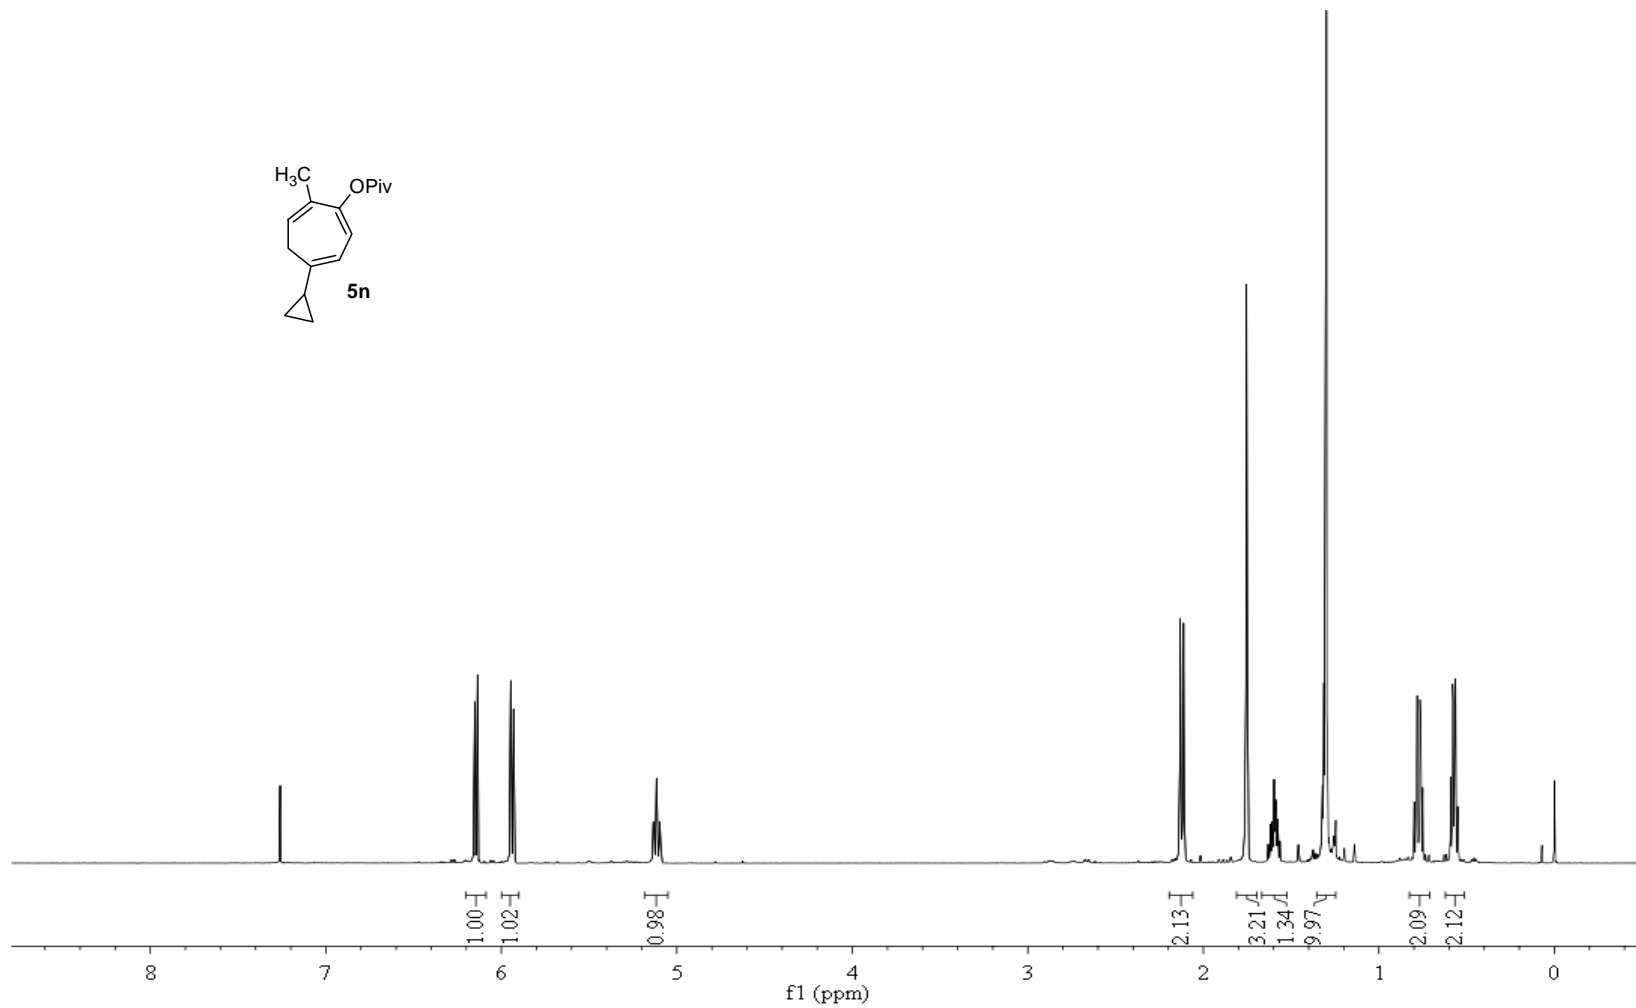

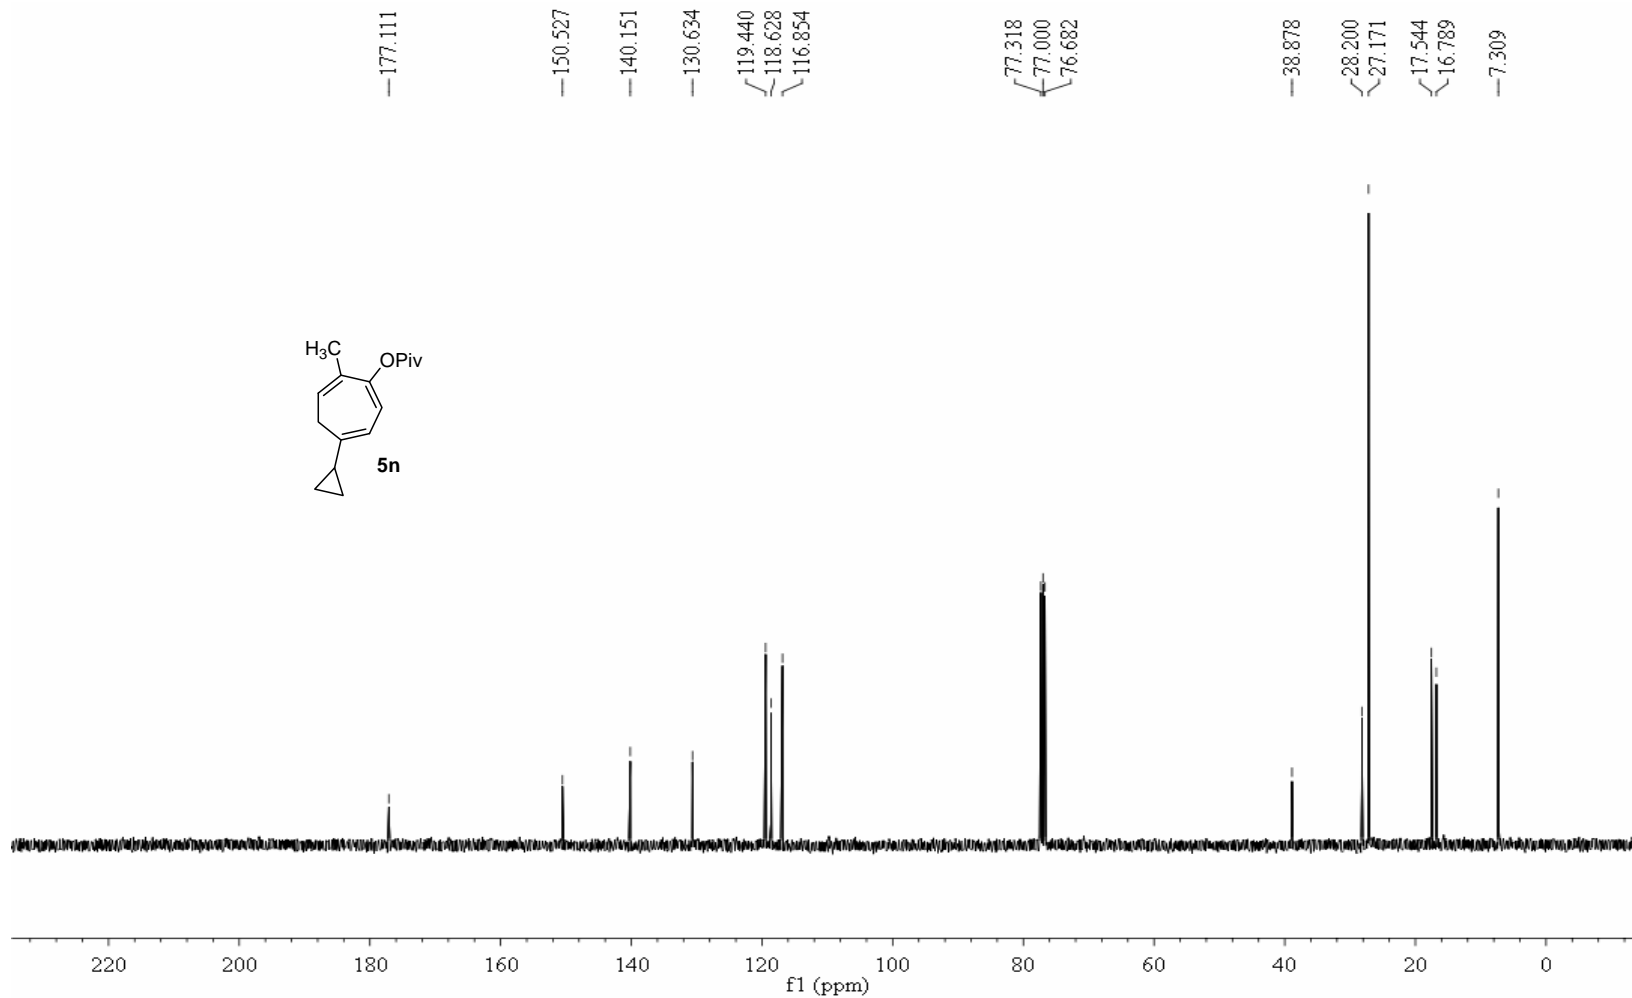

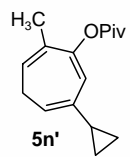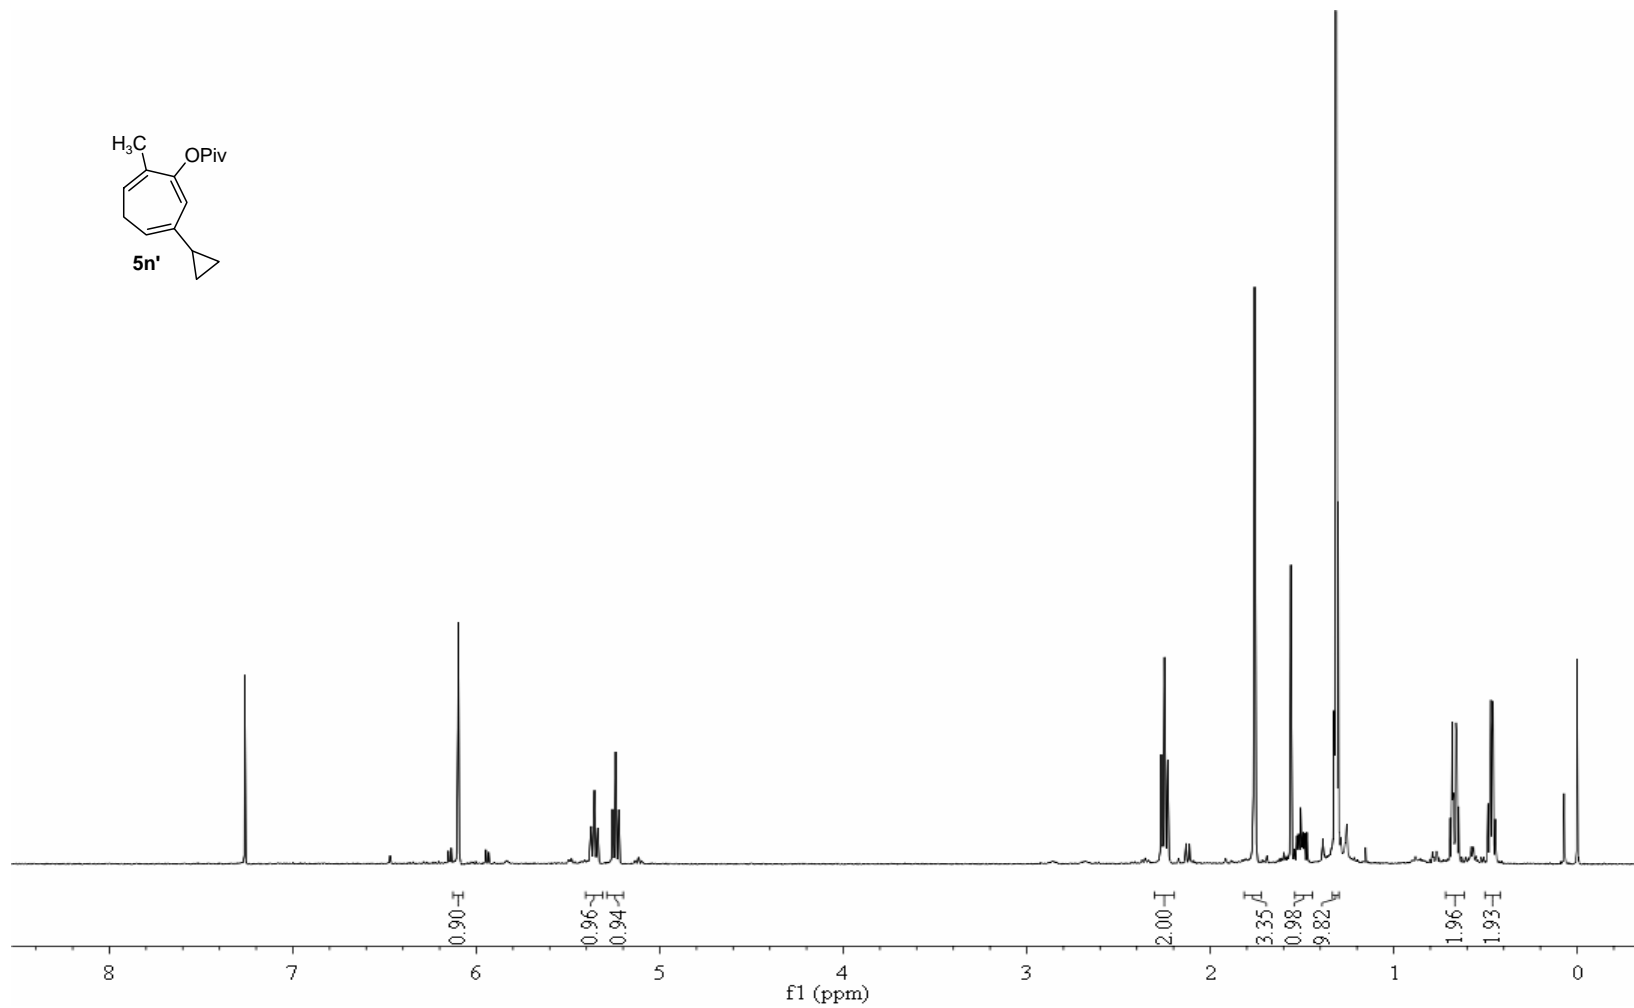

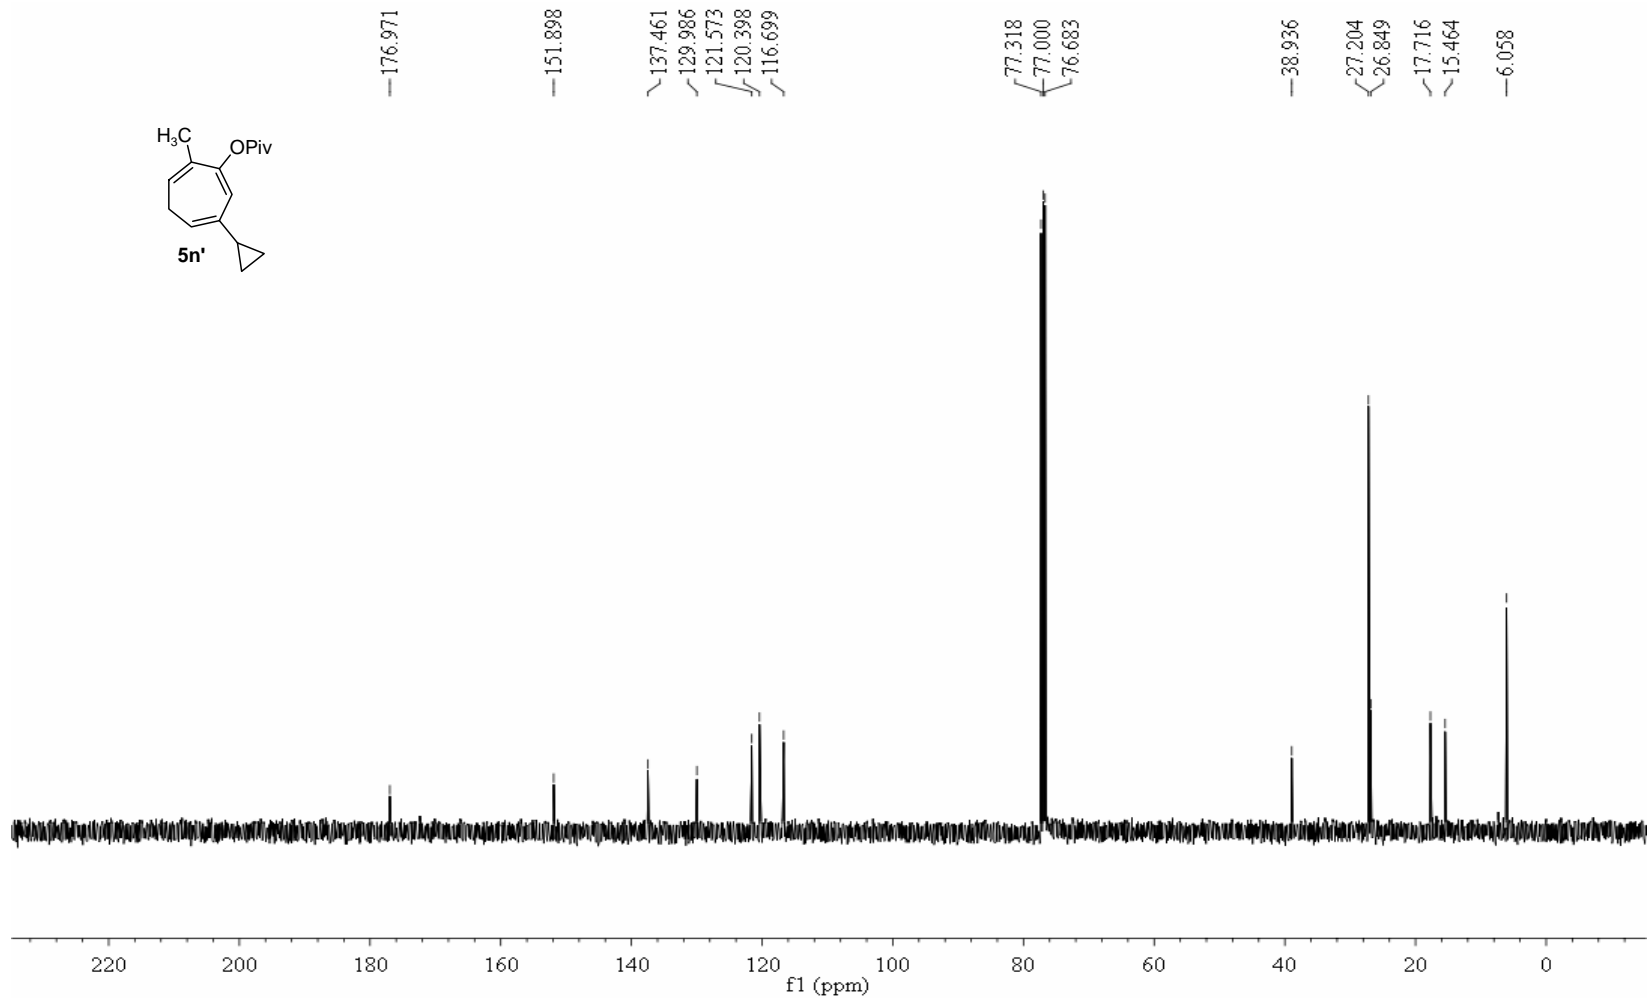



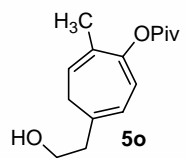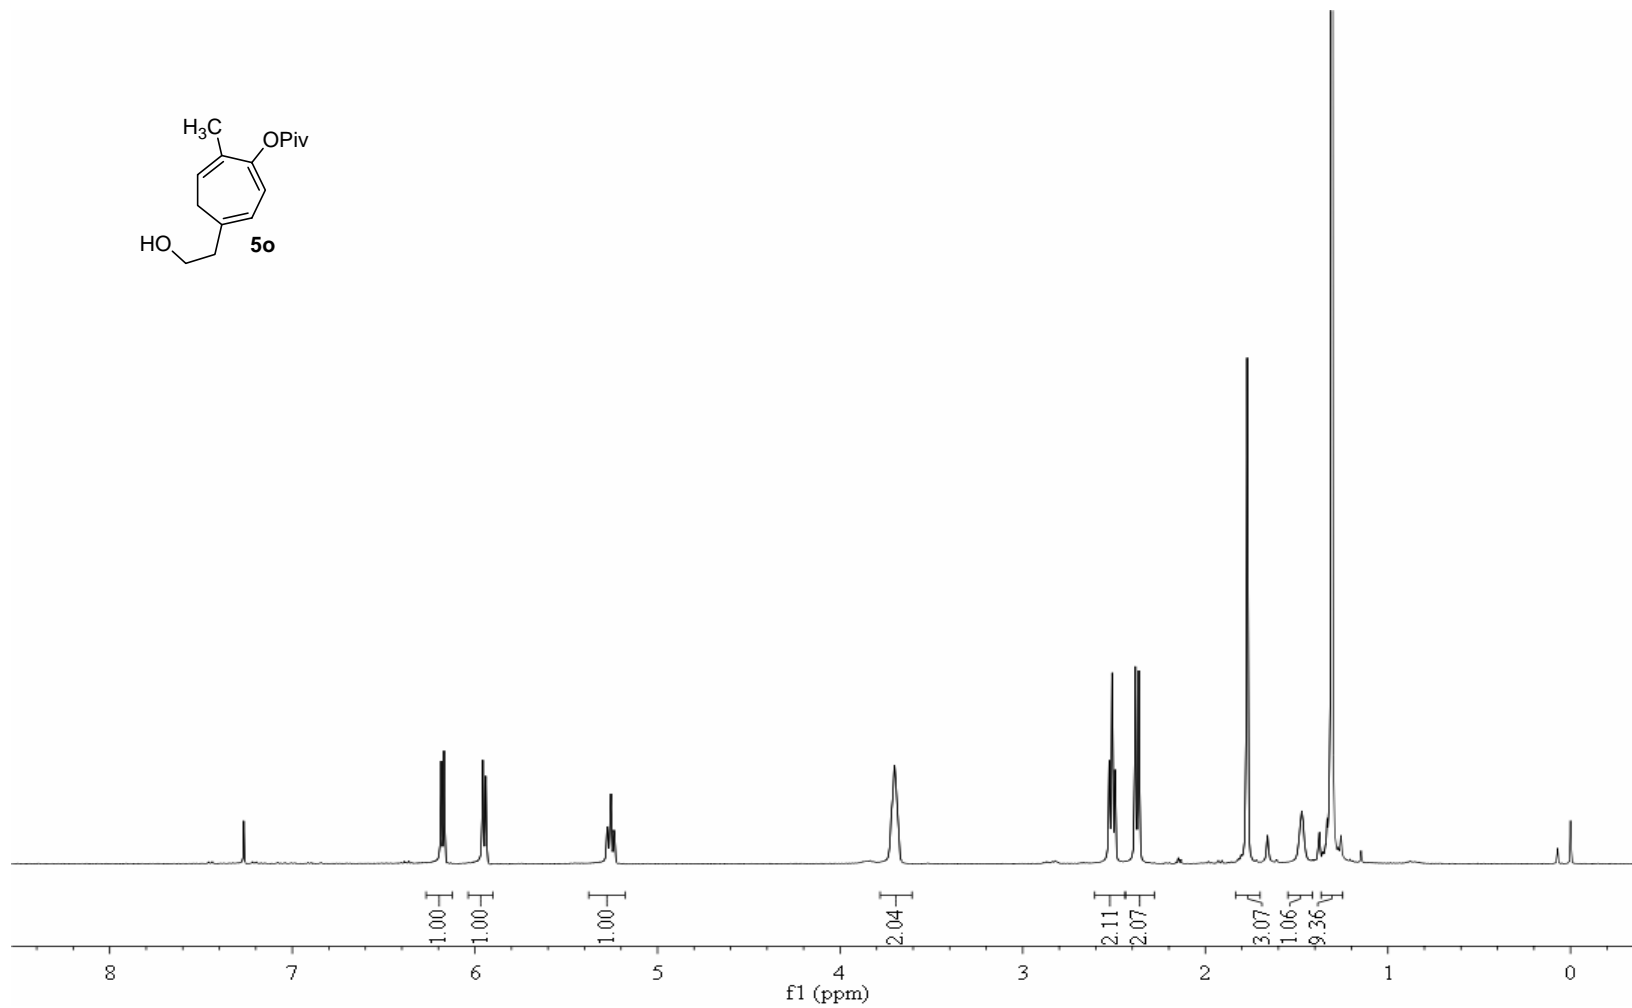

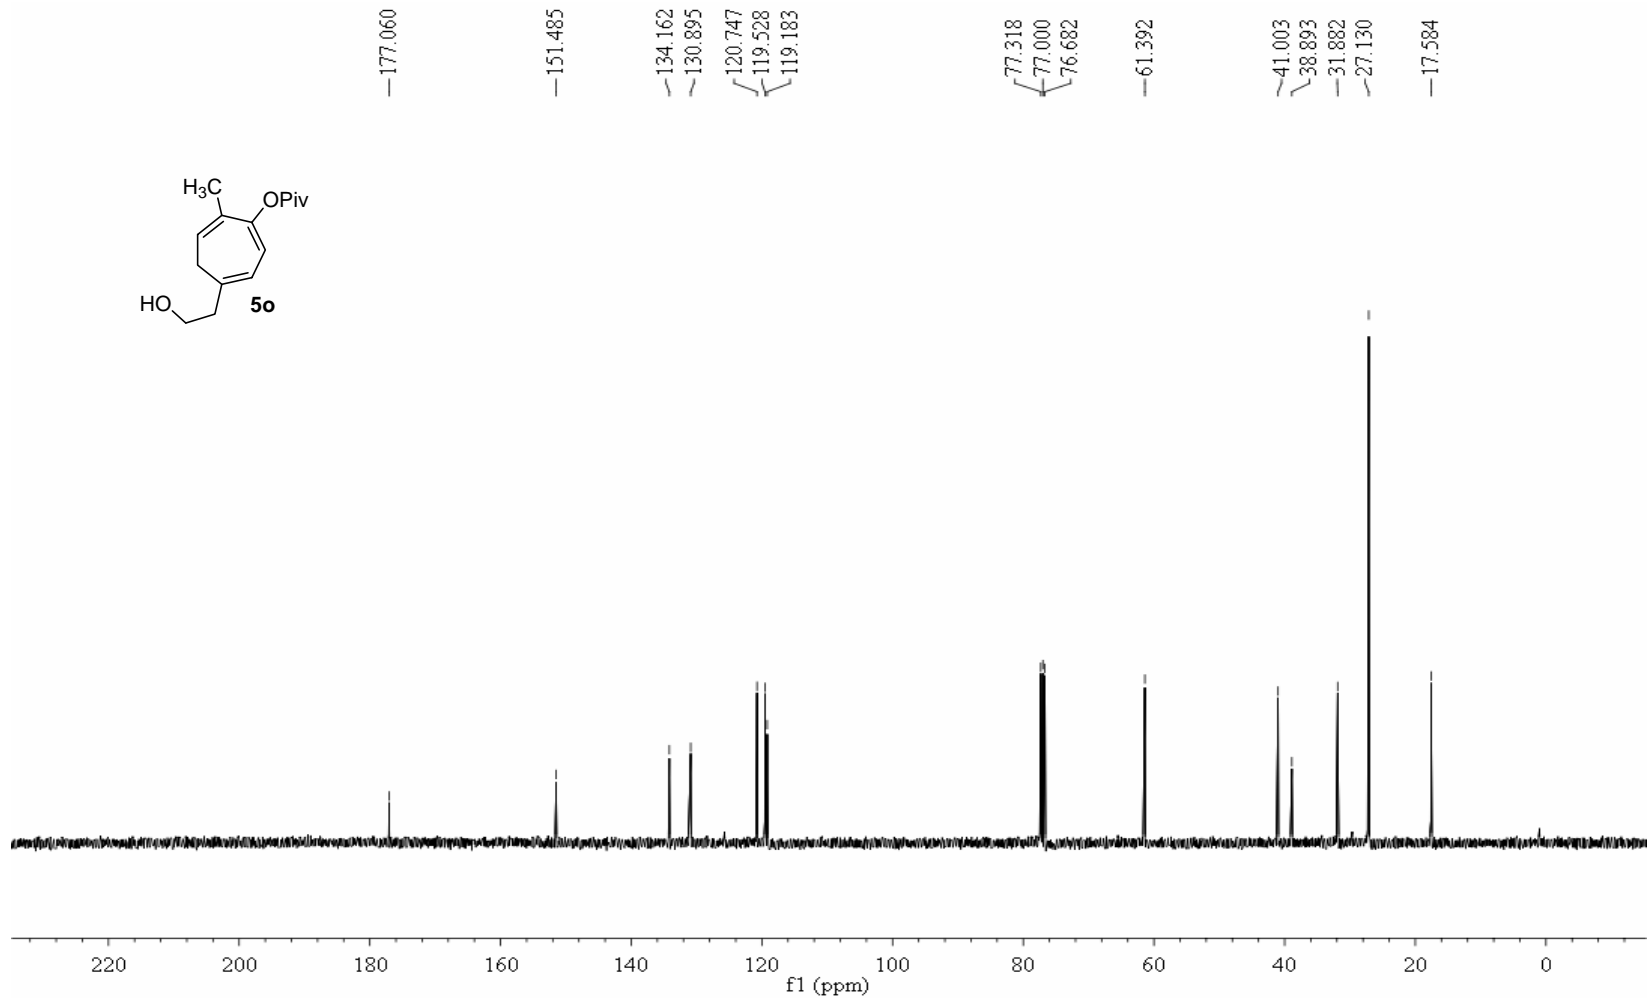

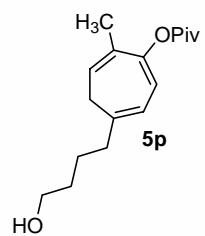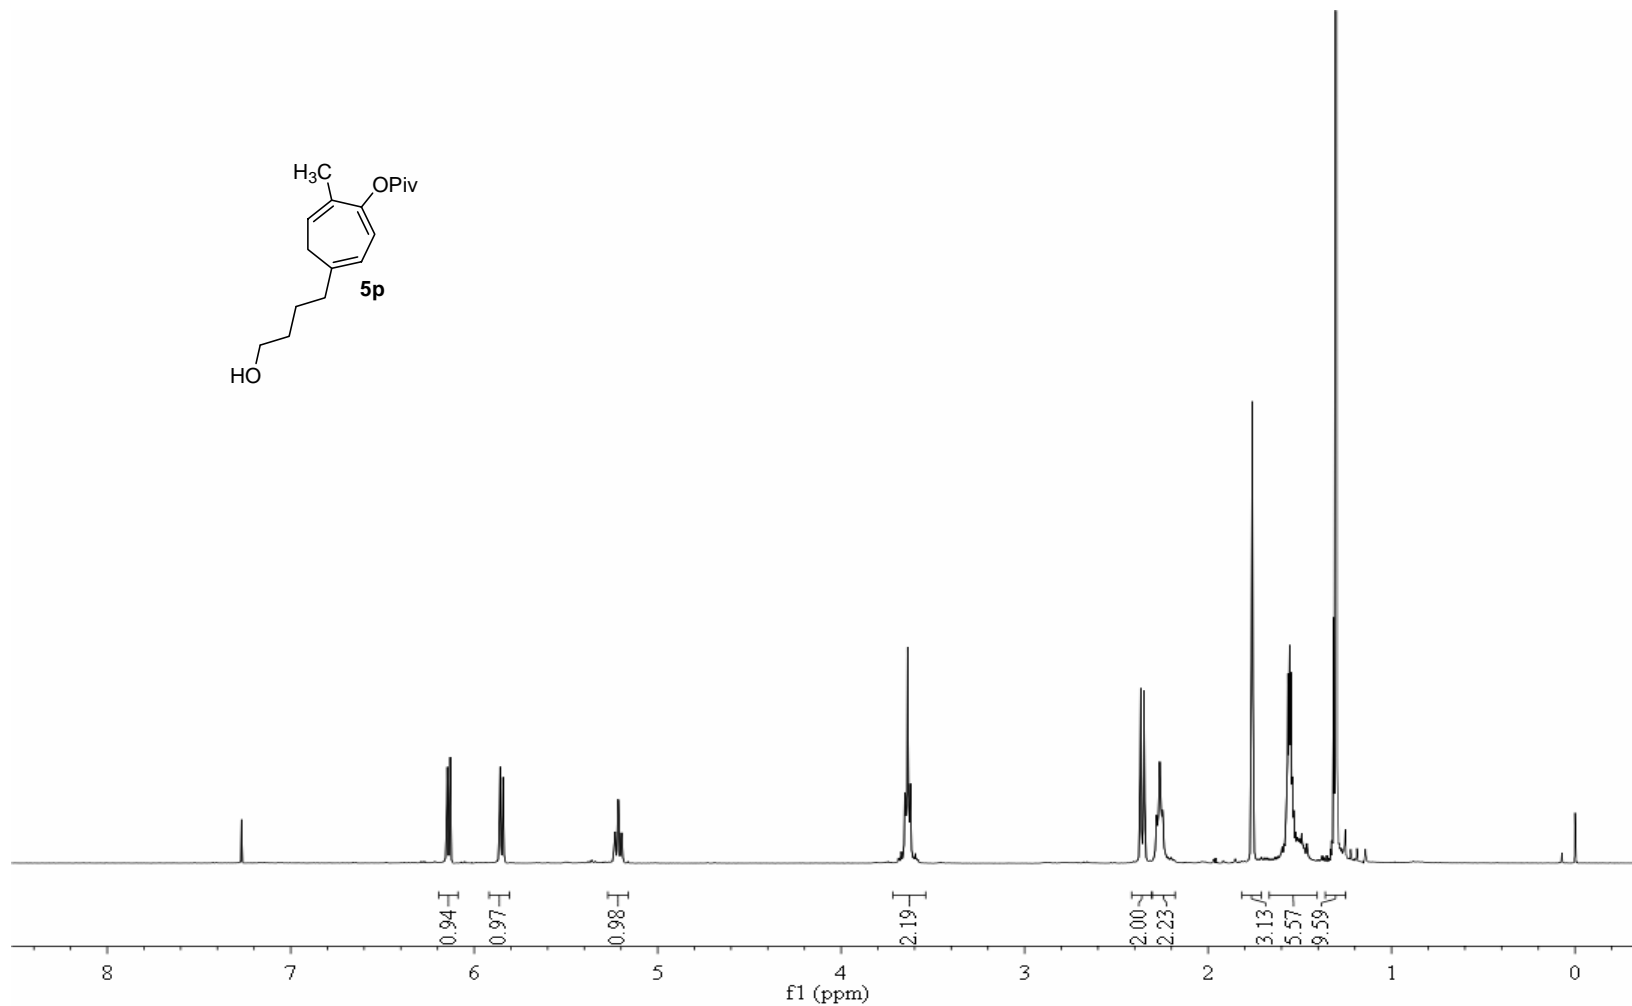

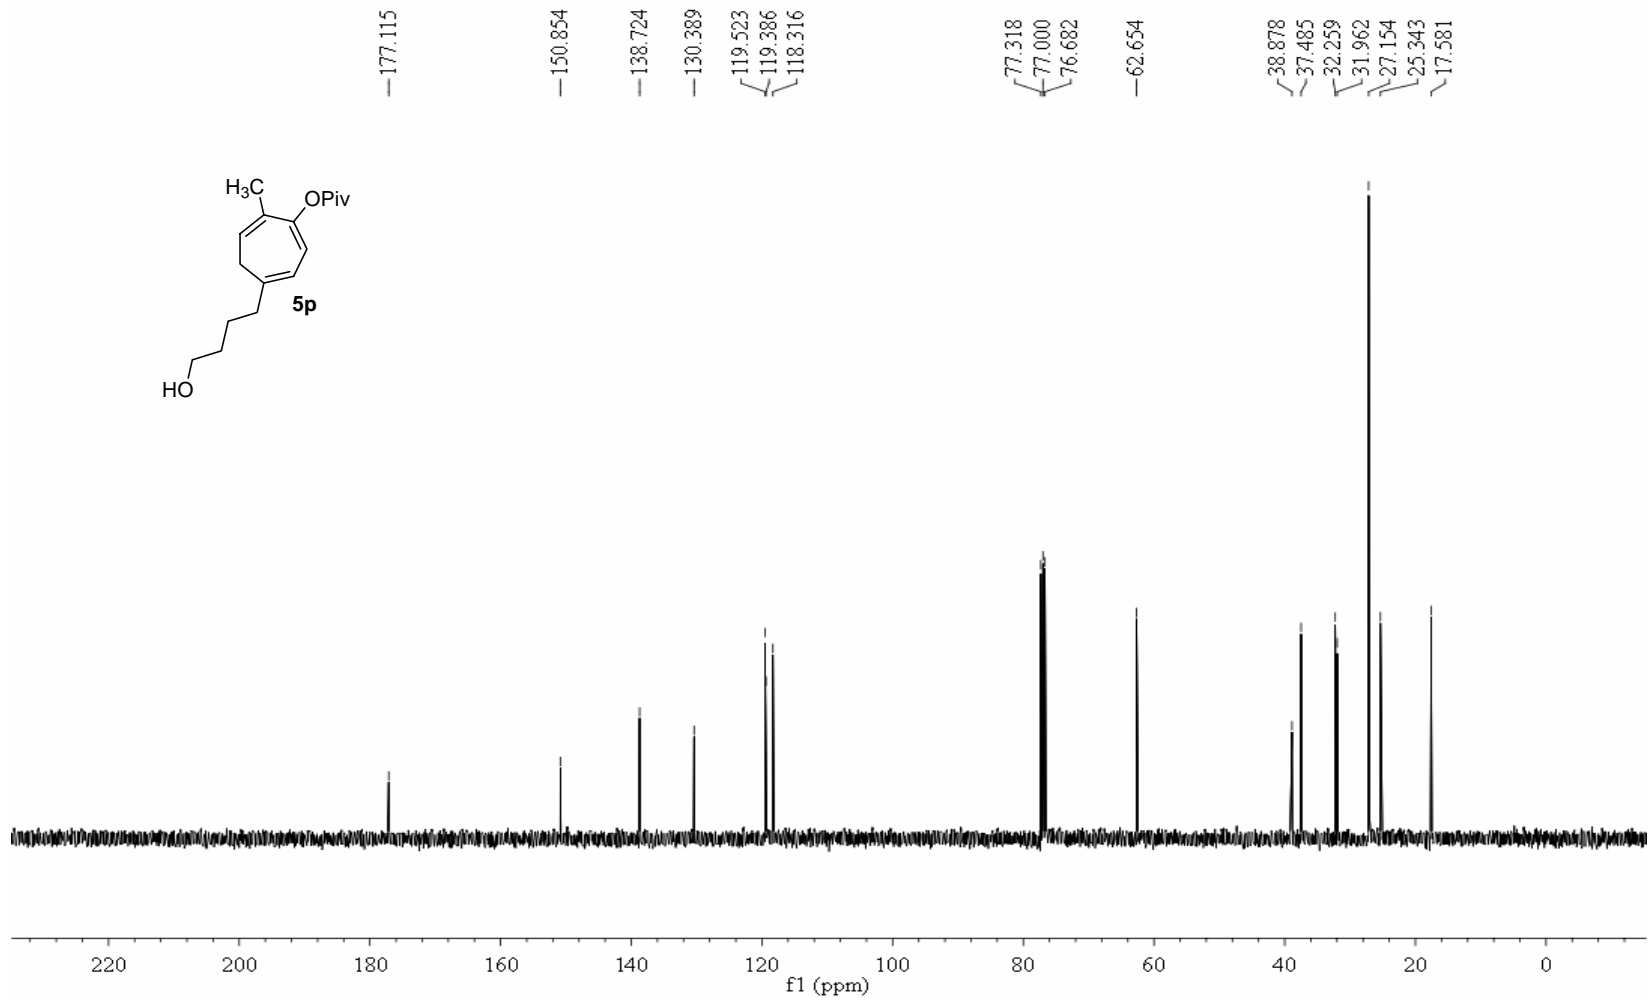

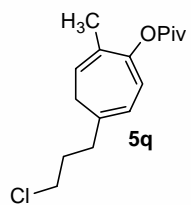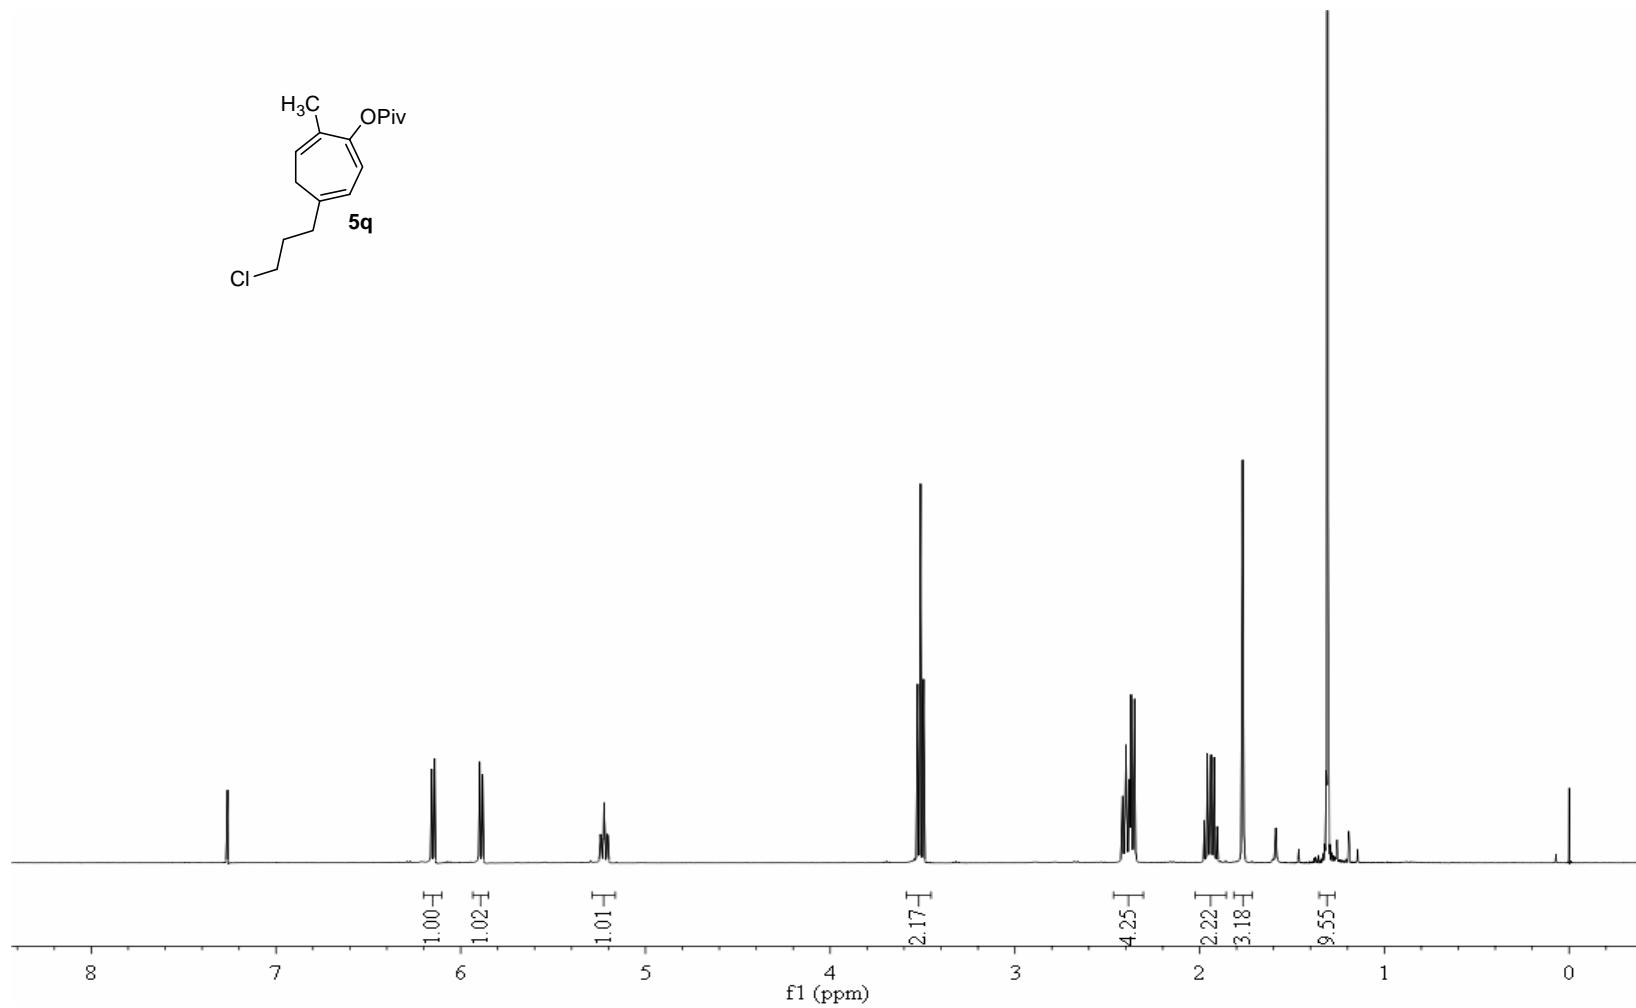

S141

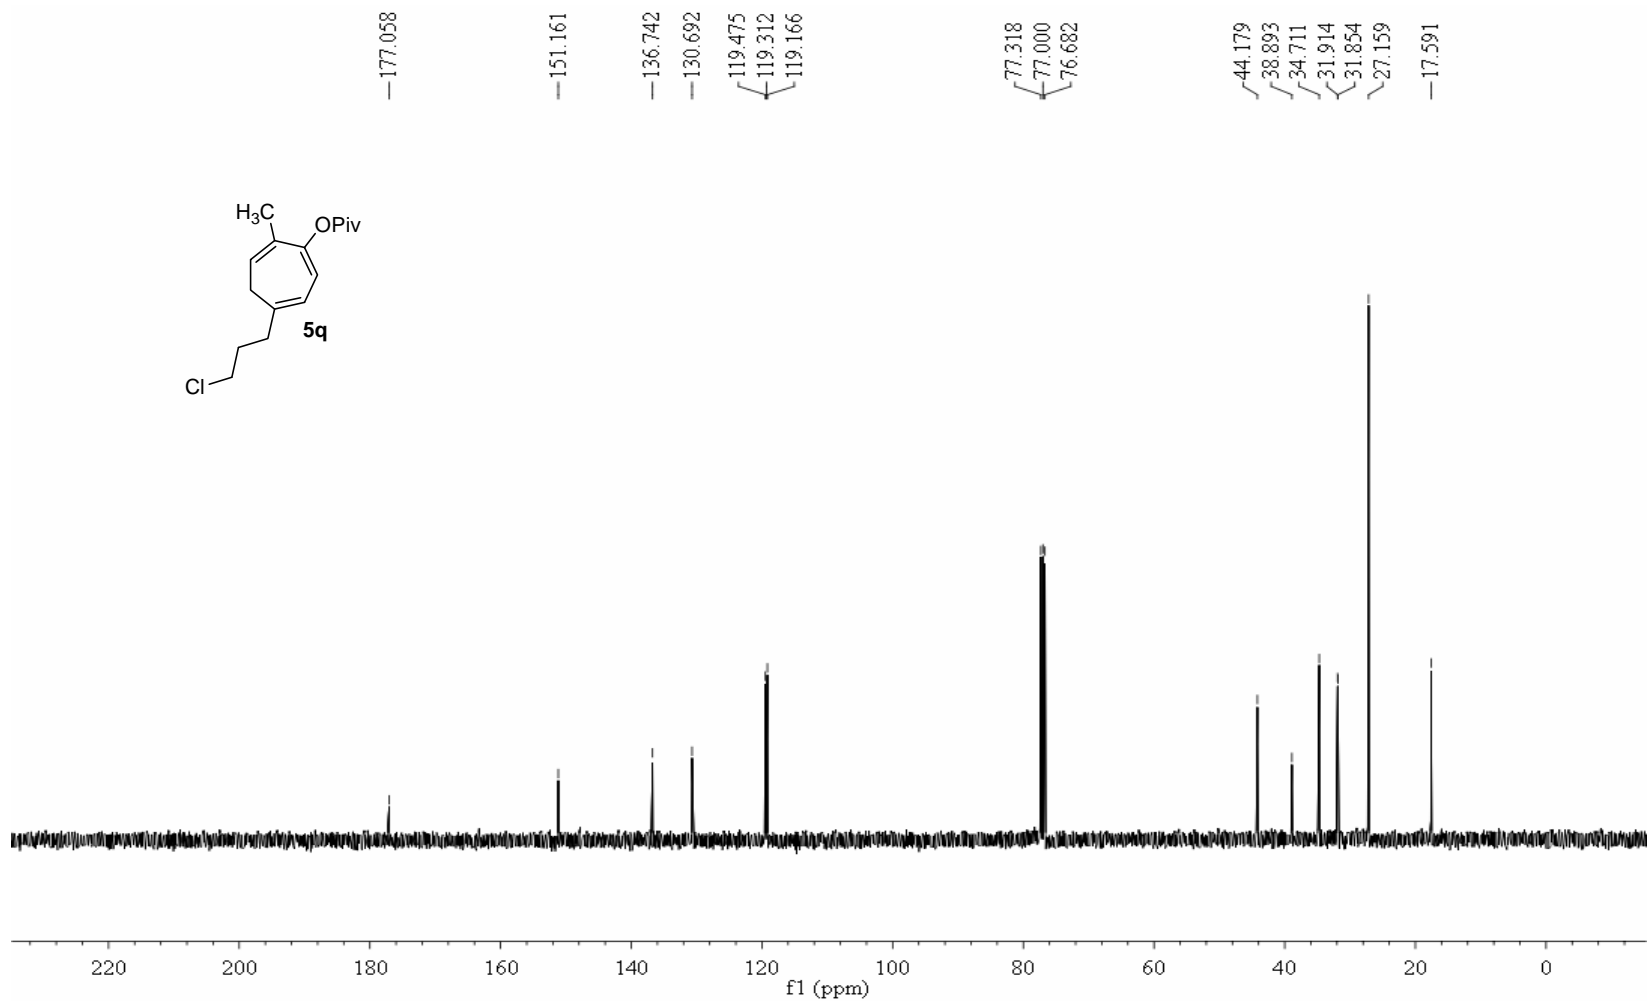

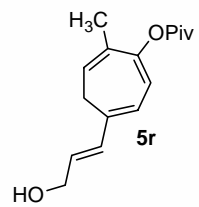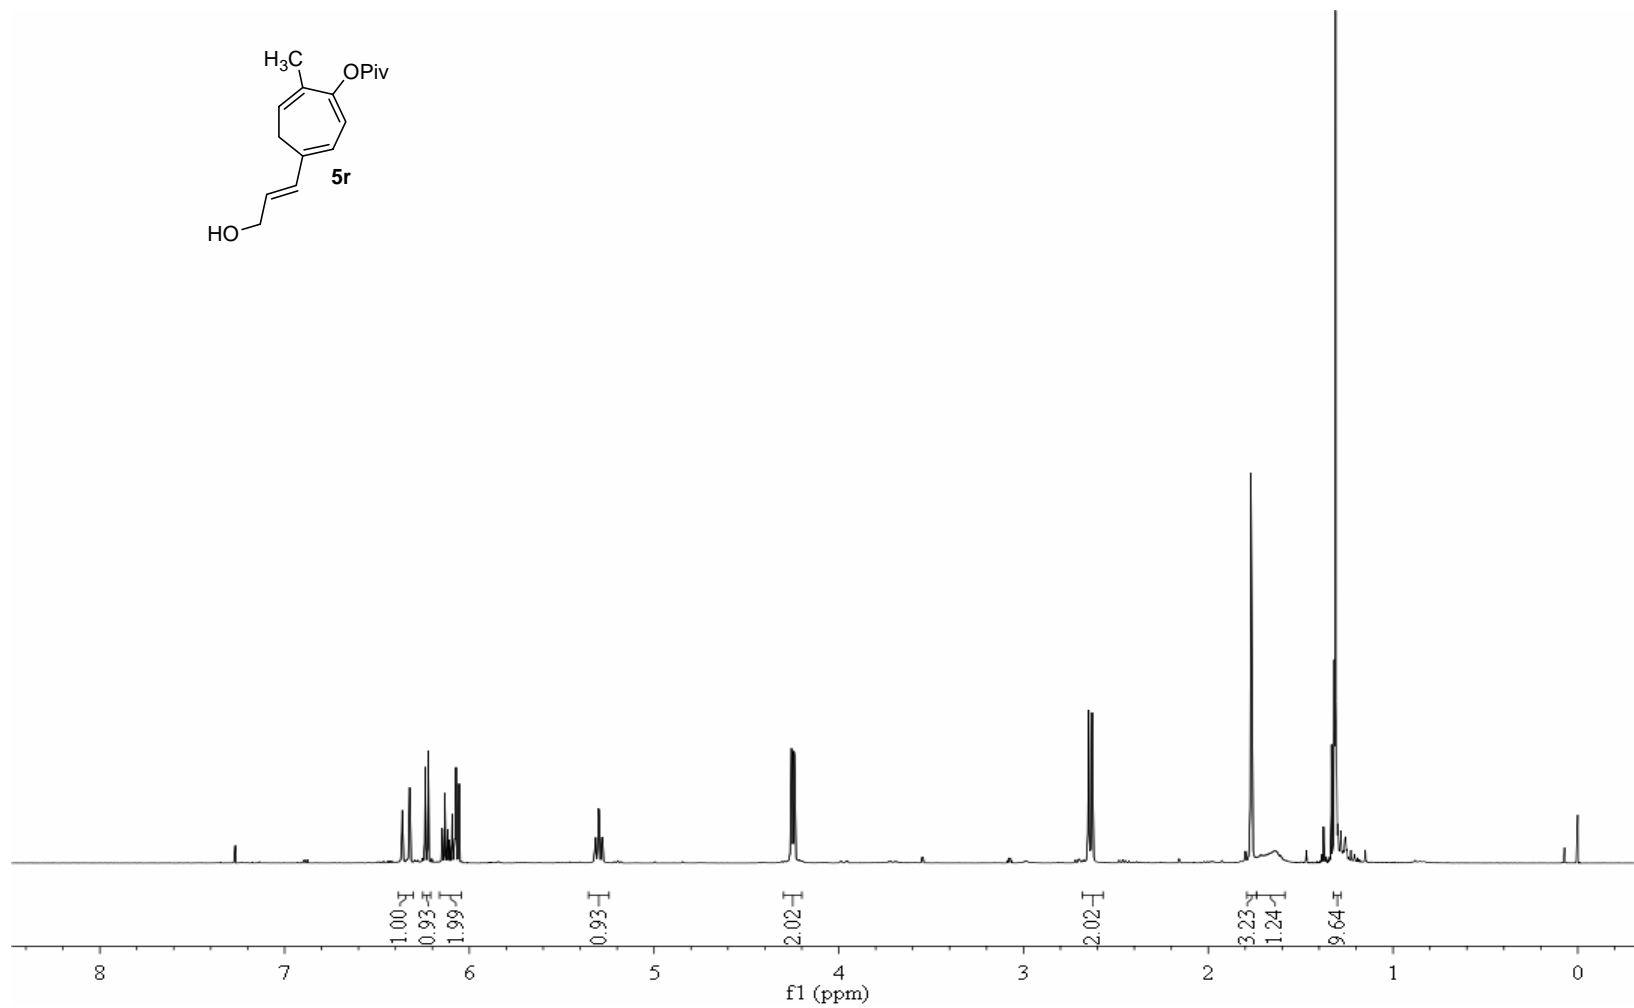

S143

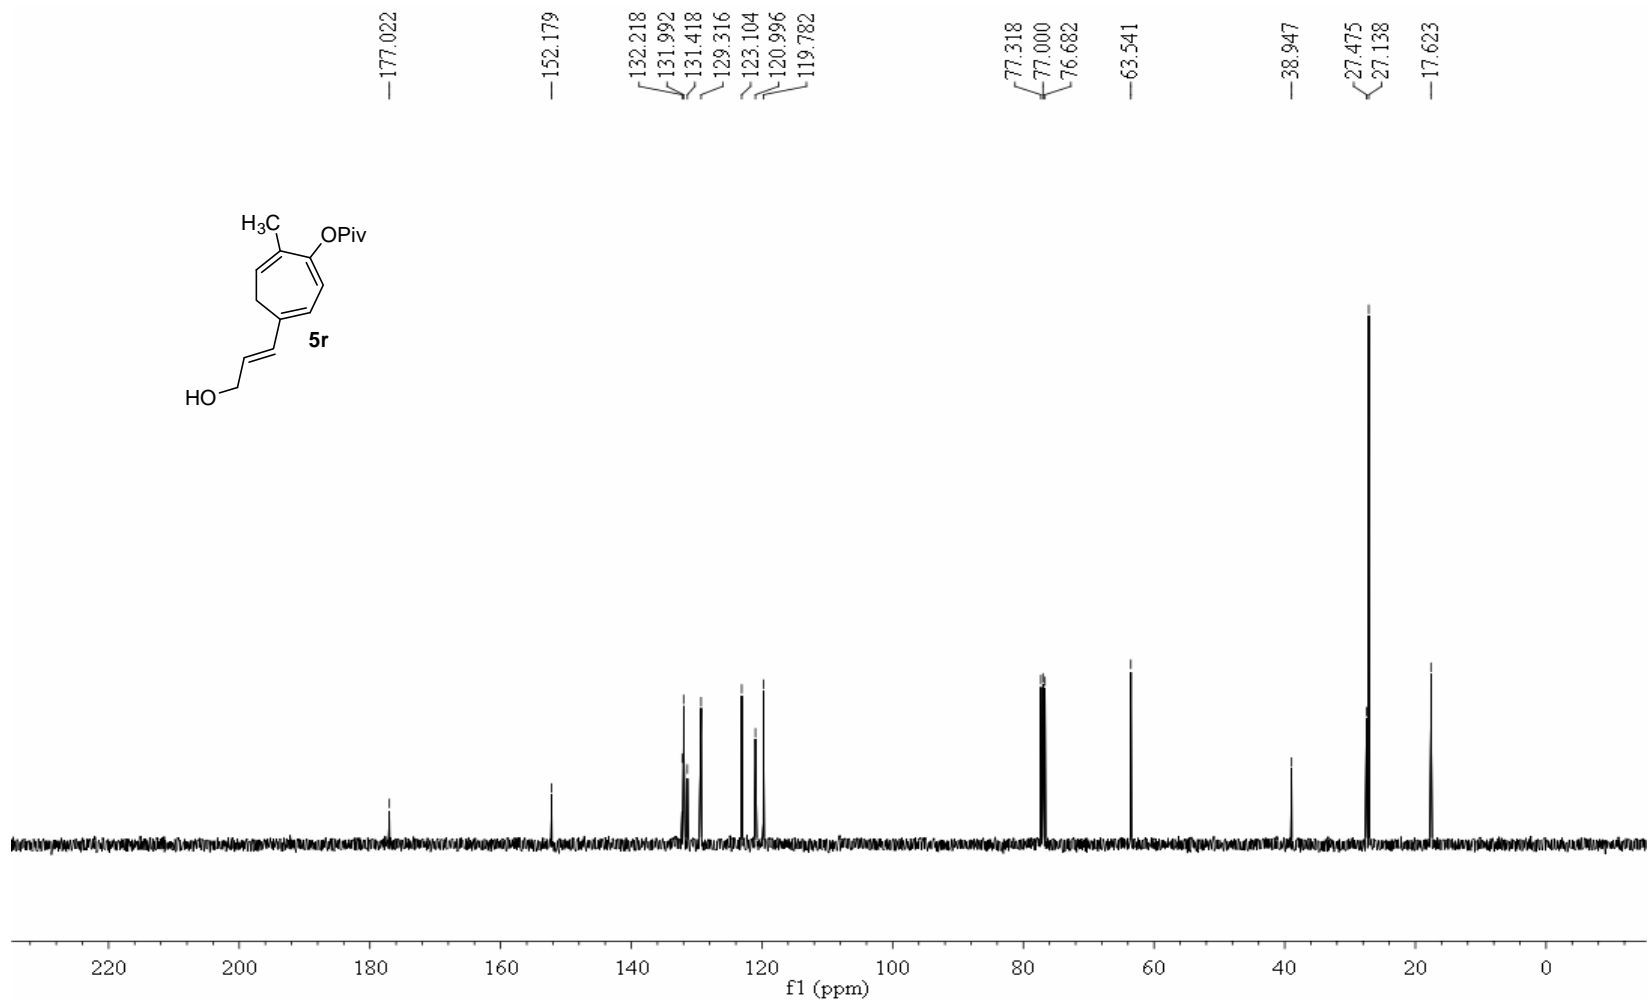



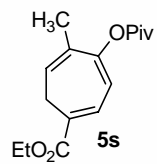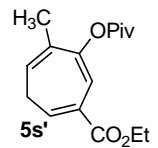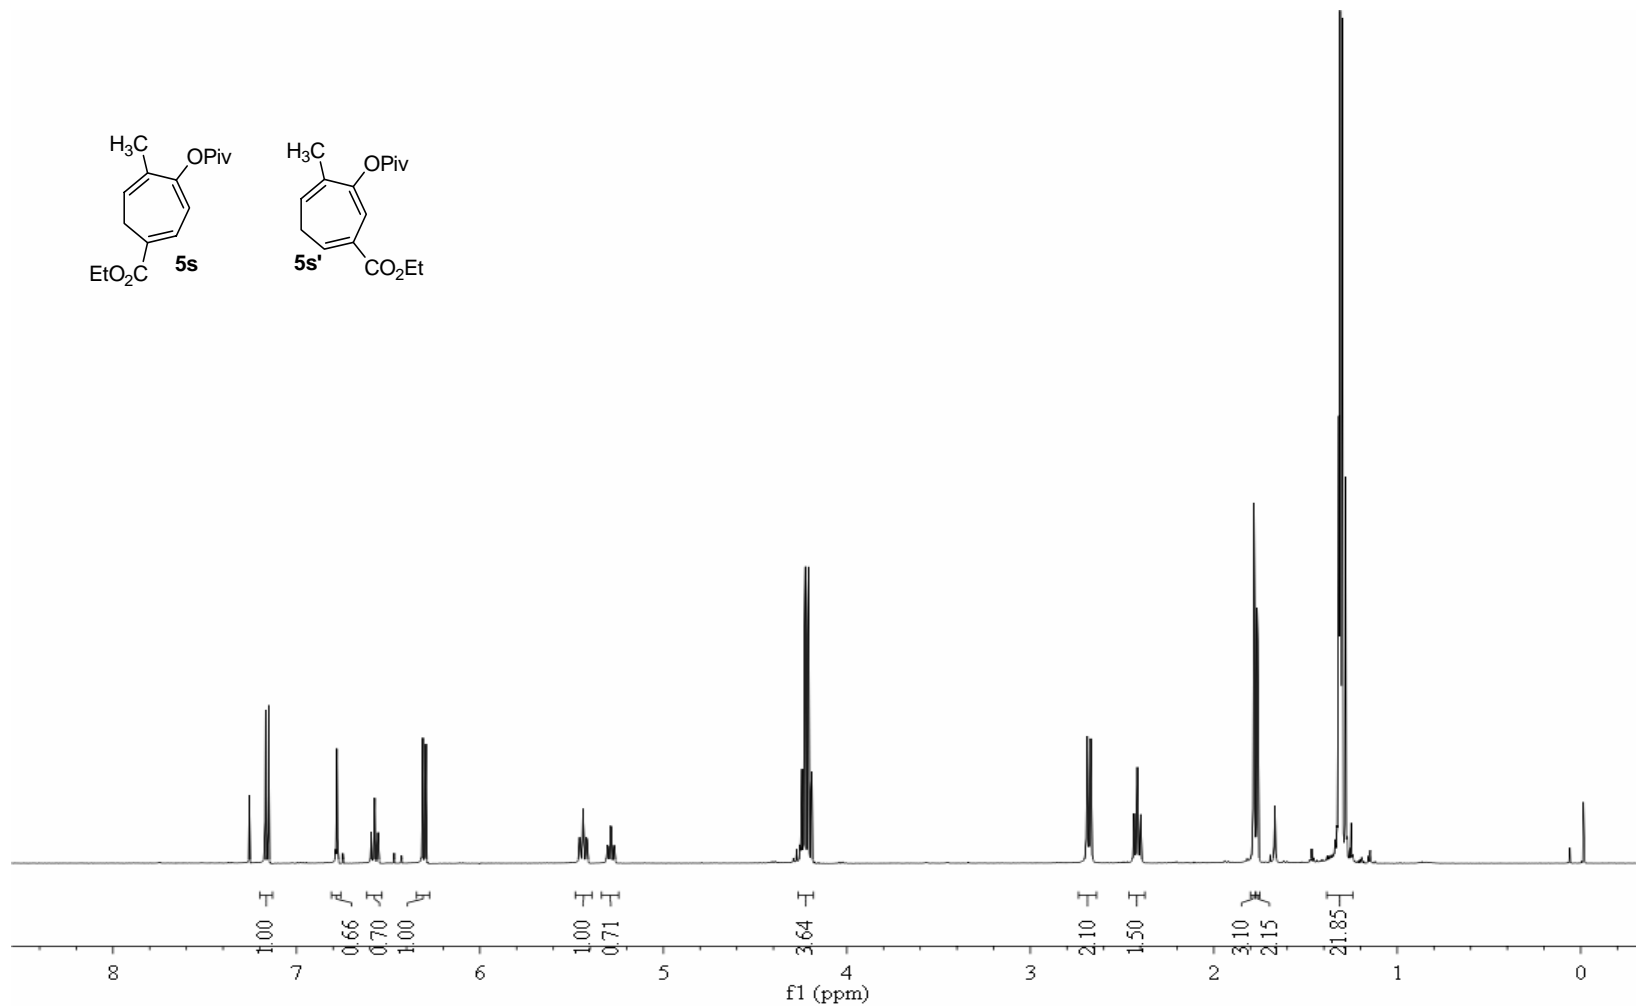

S145

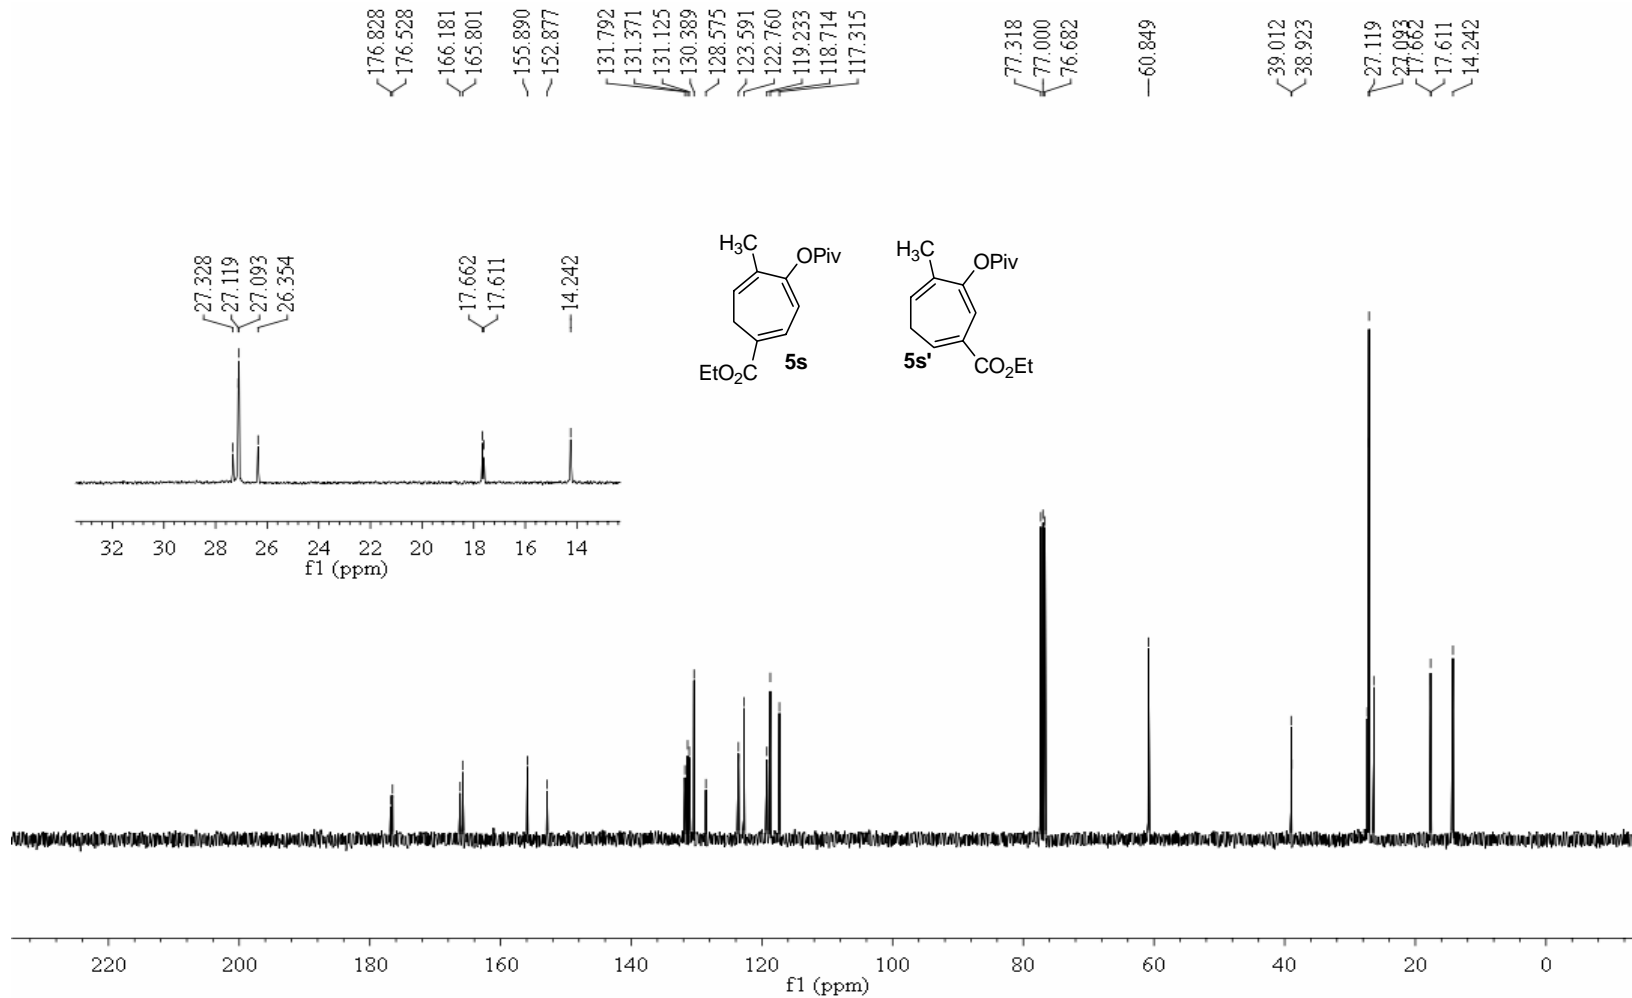

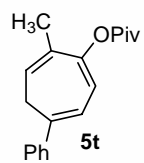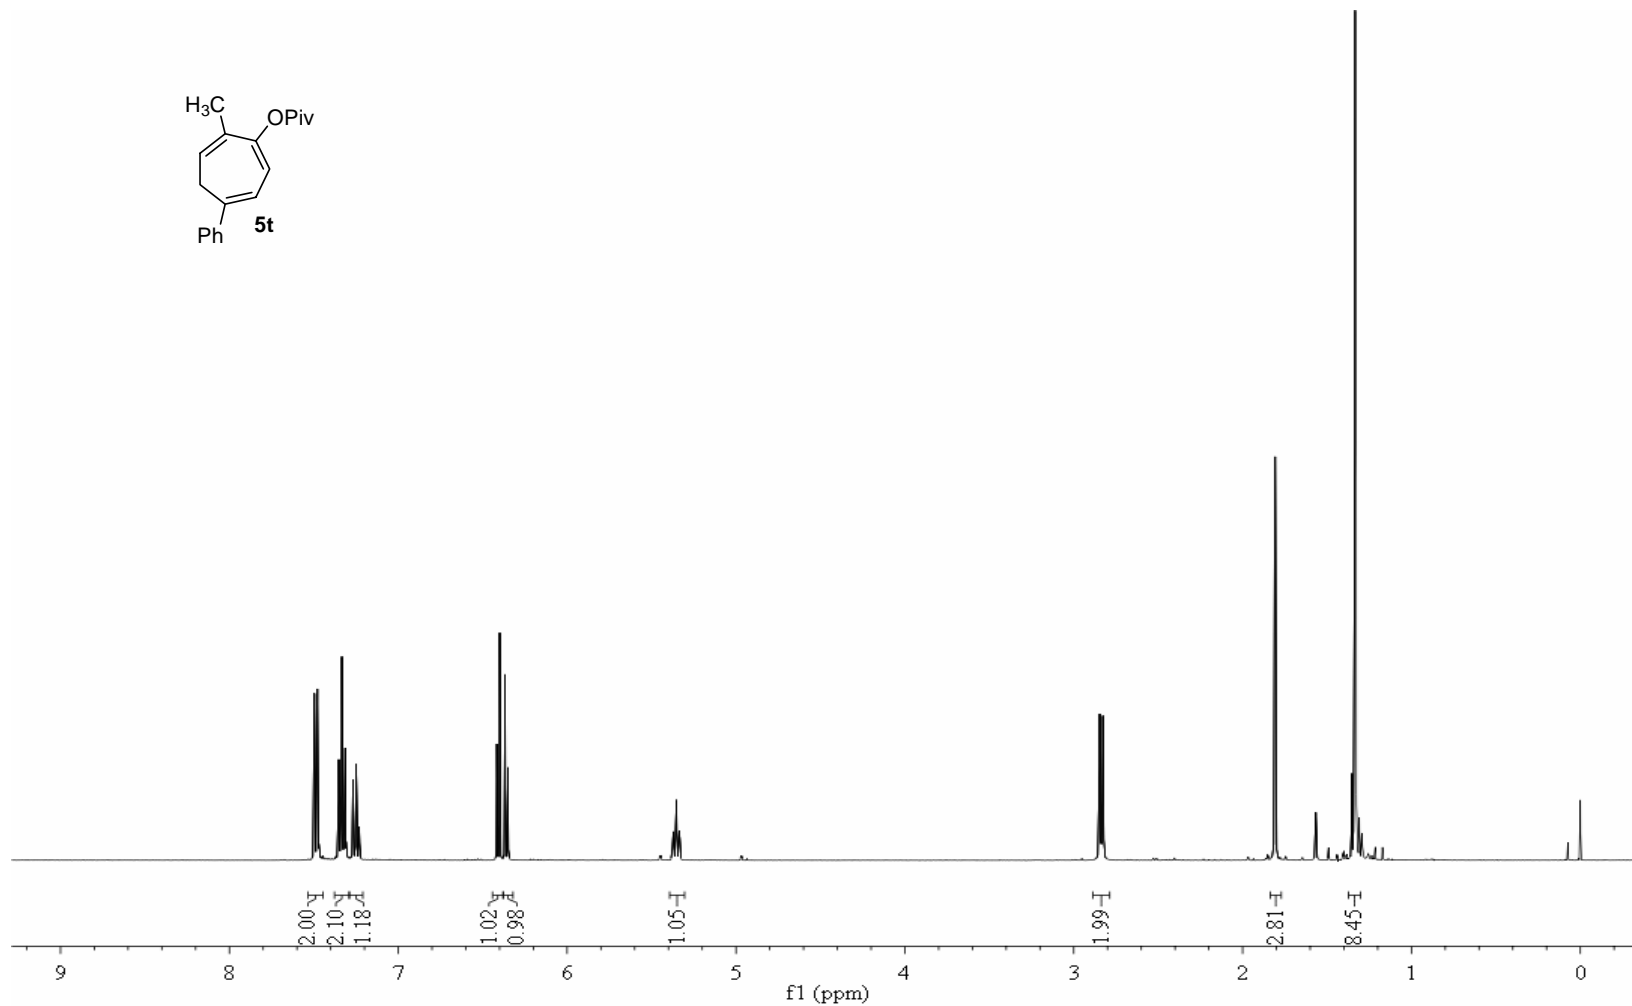

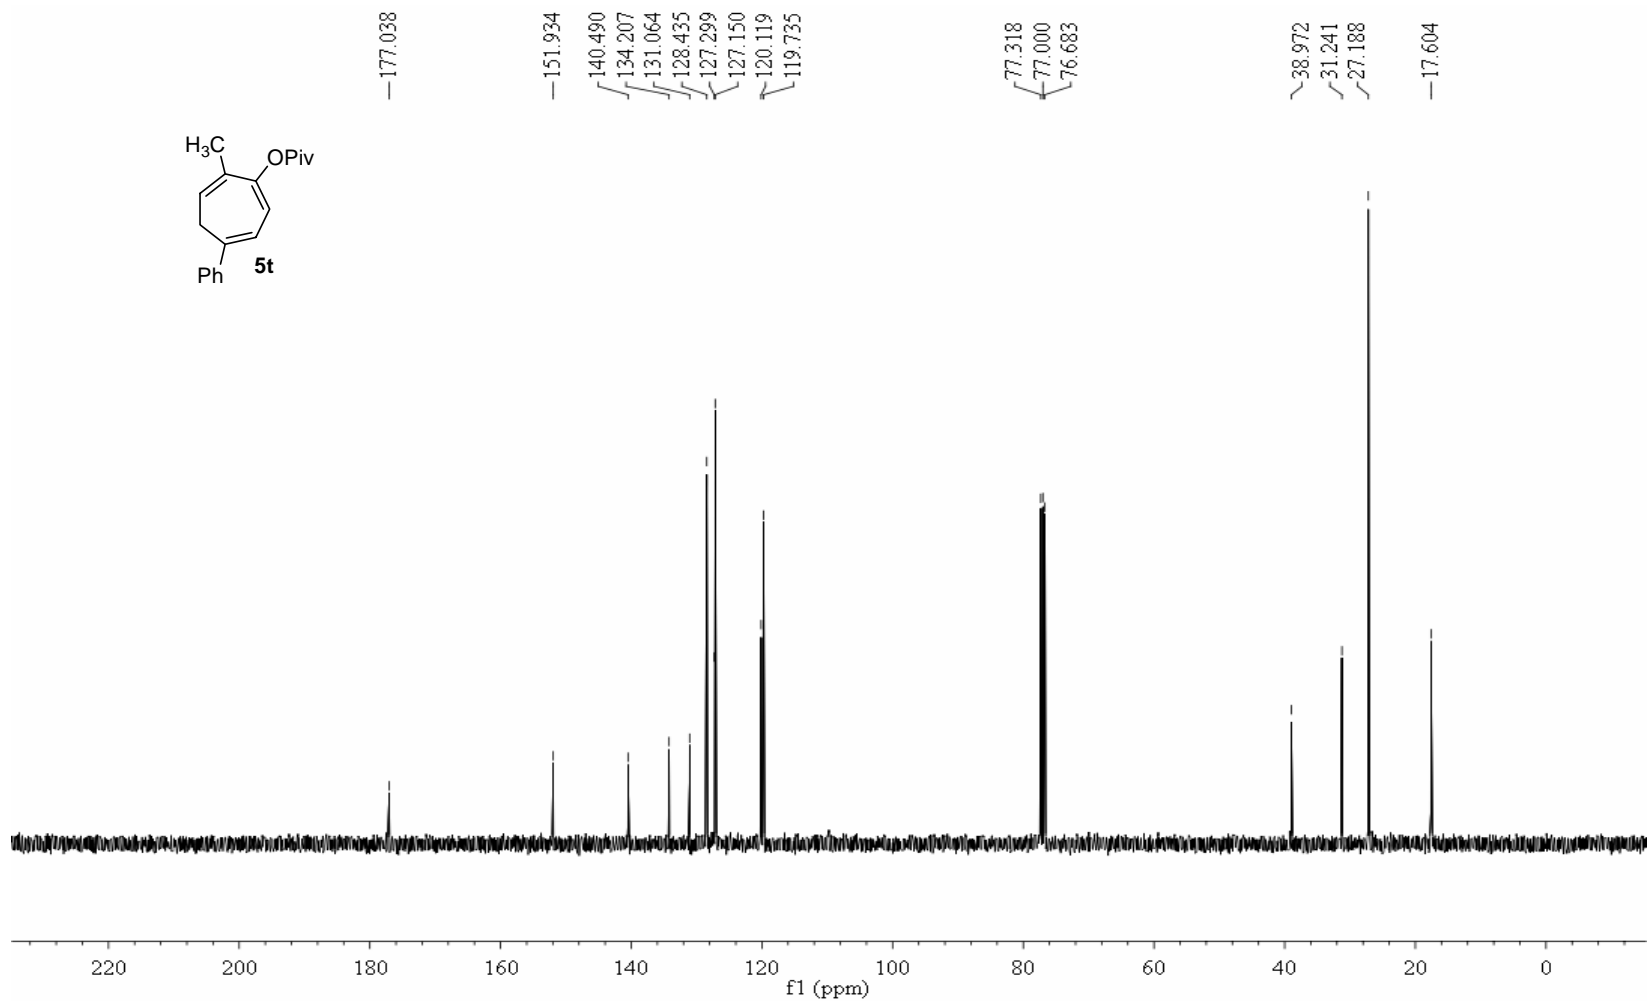

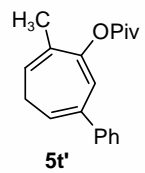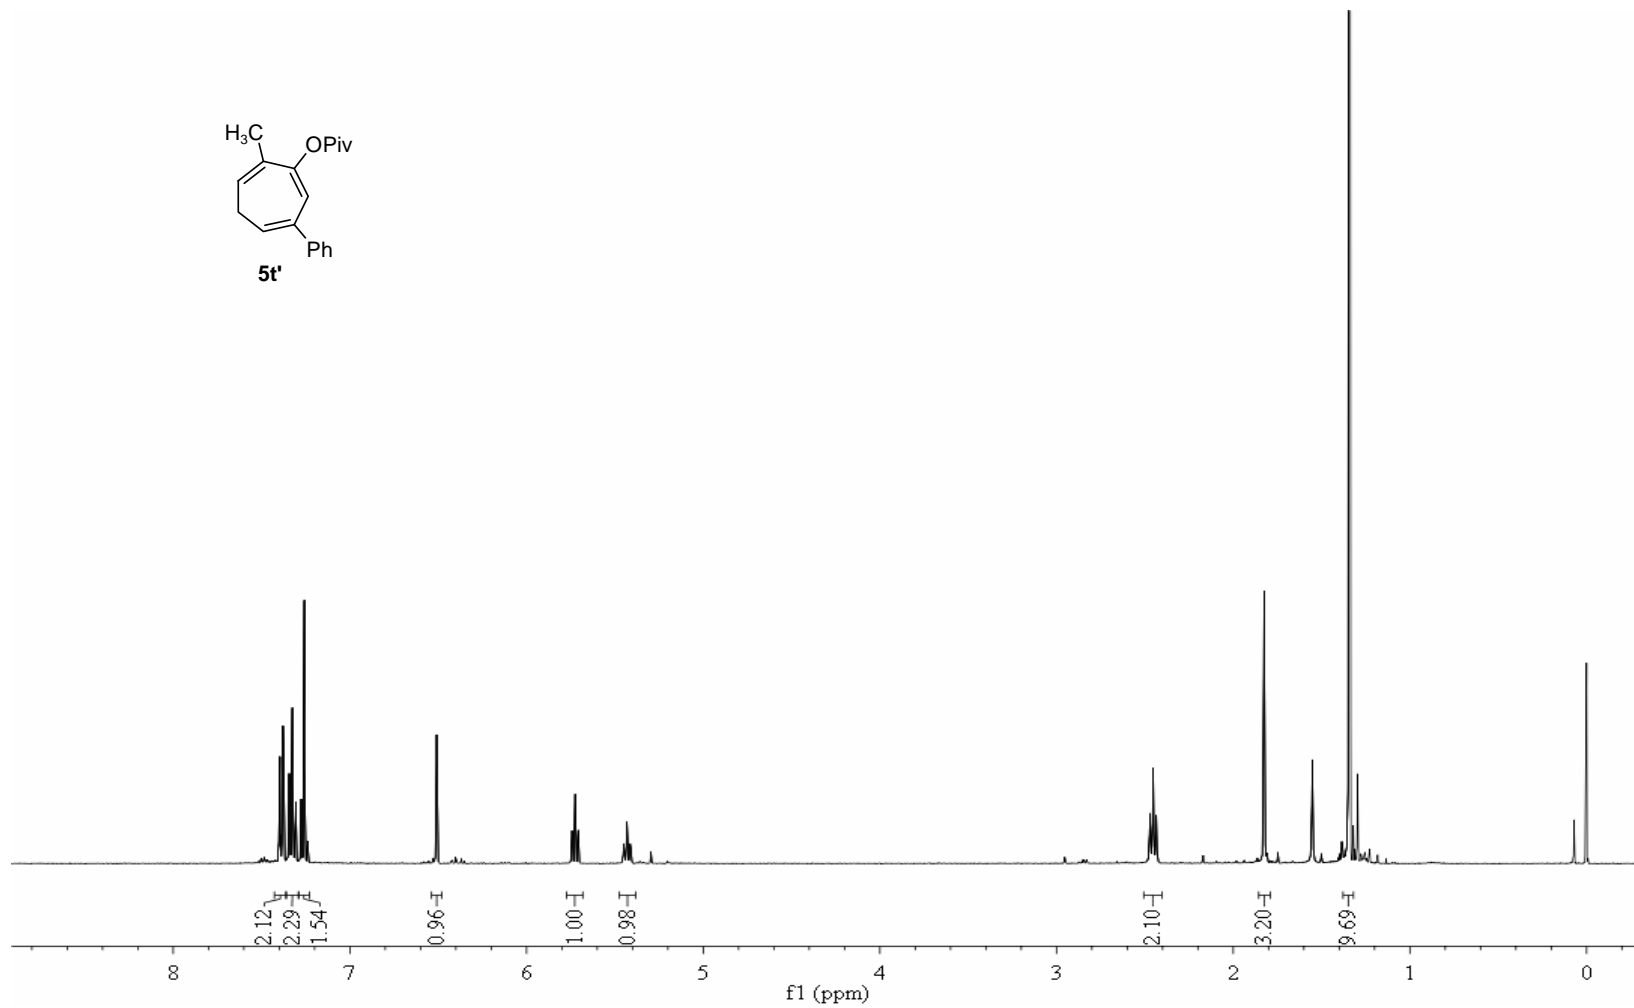

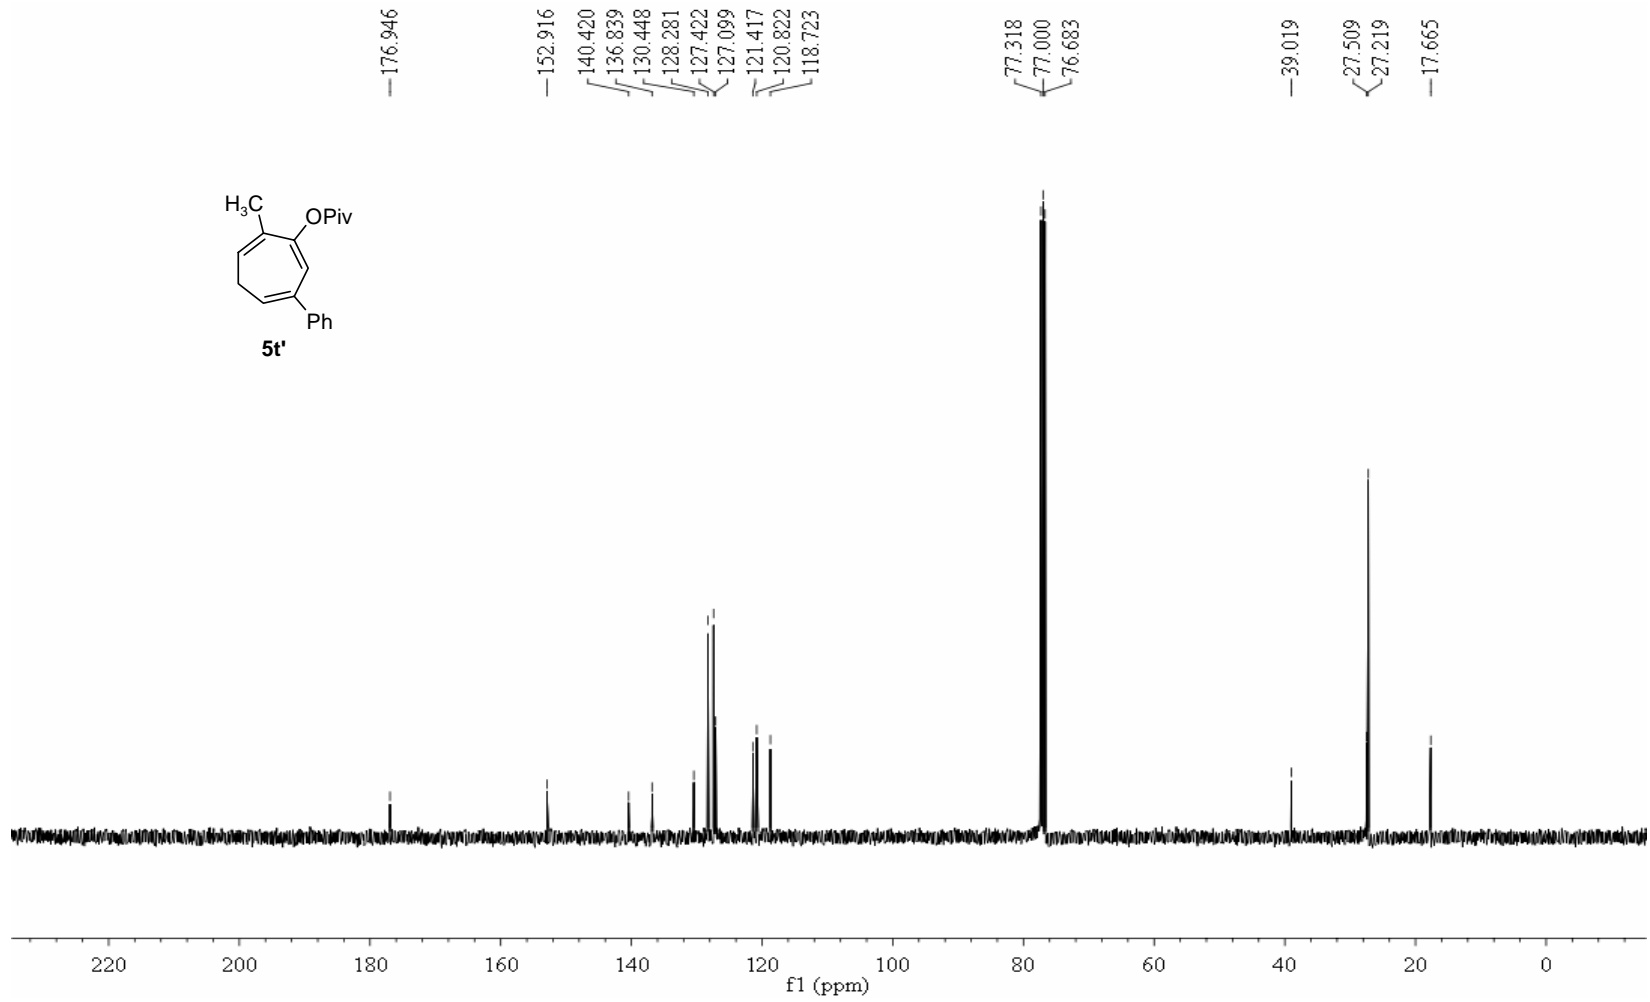

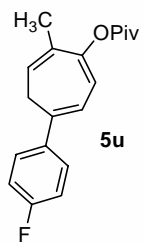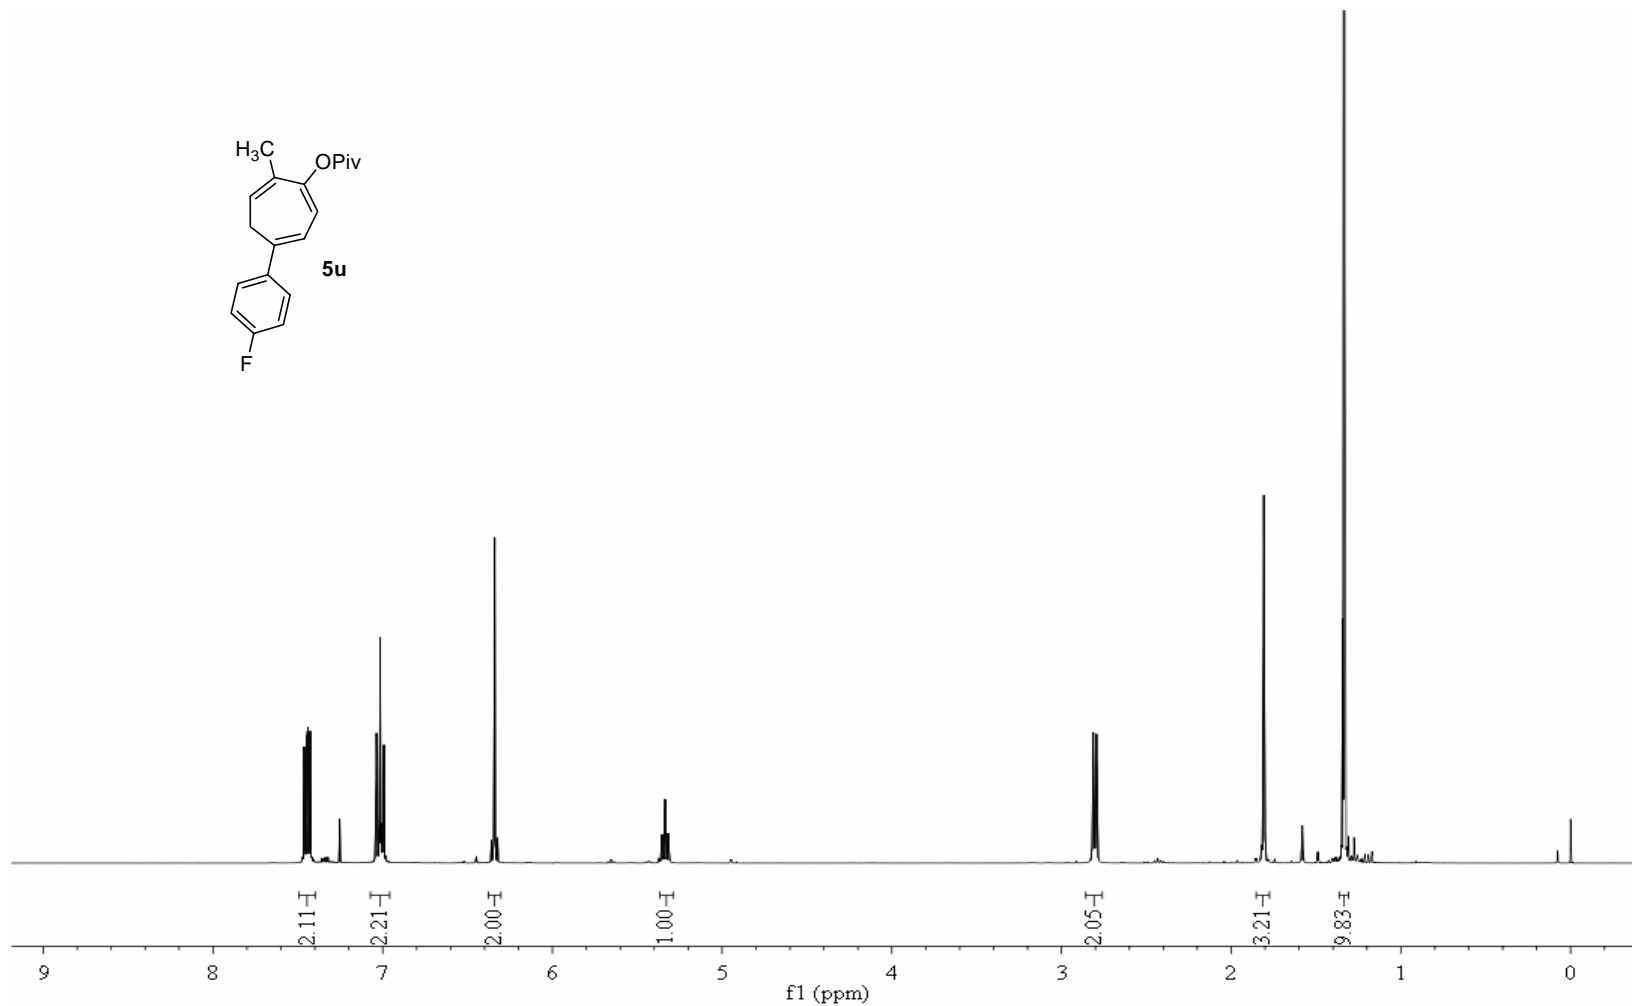

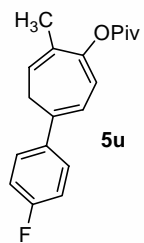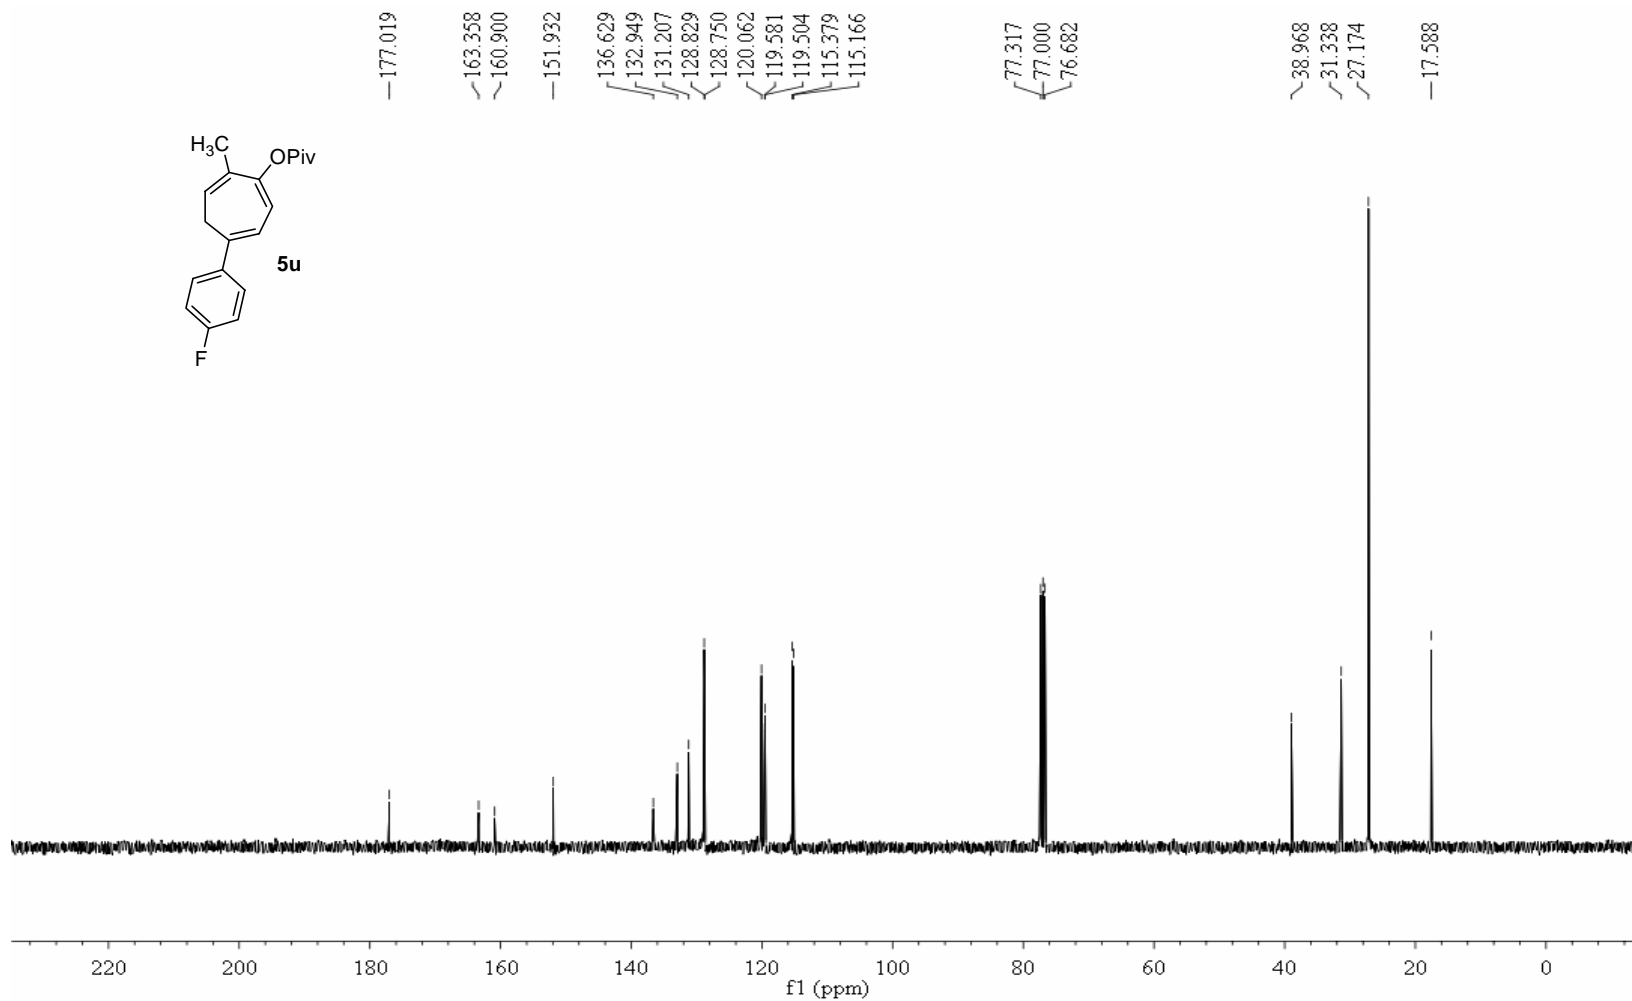



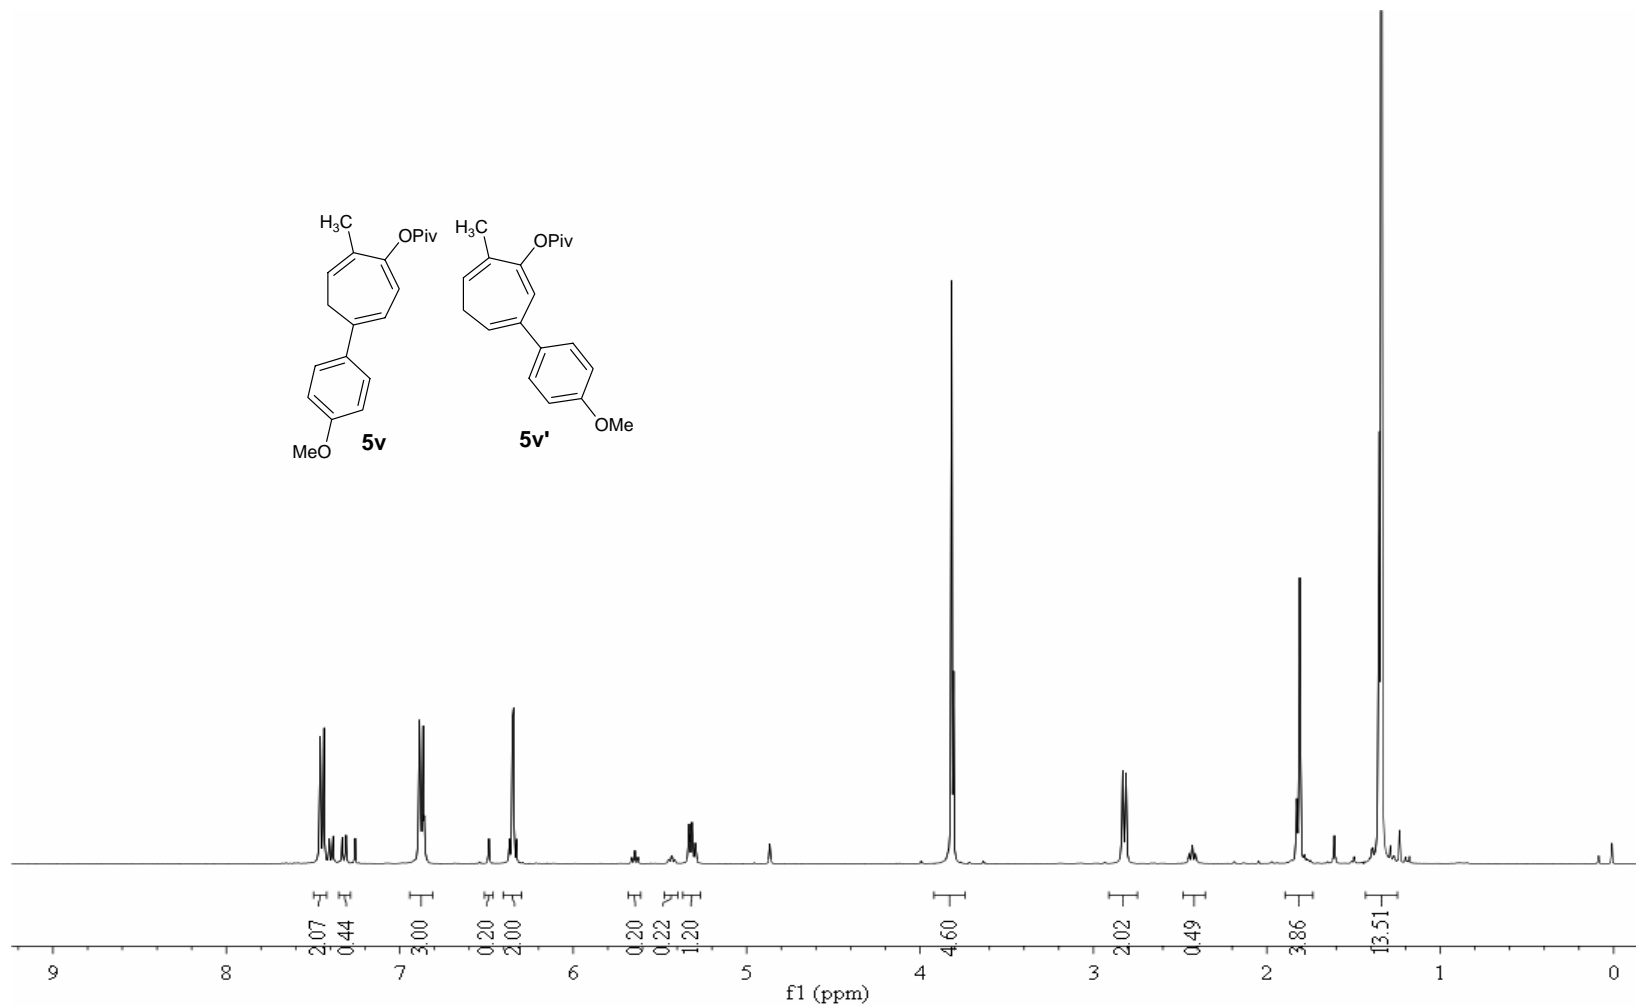

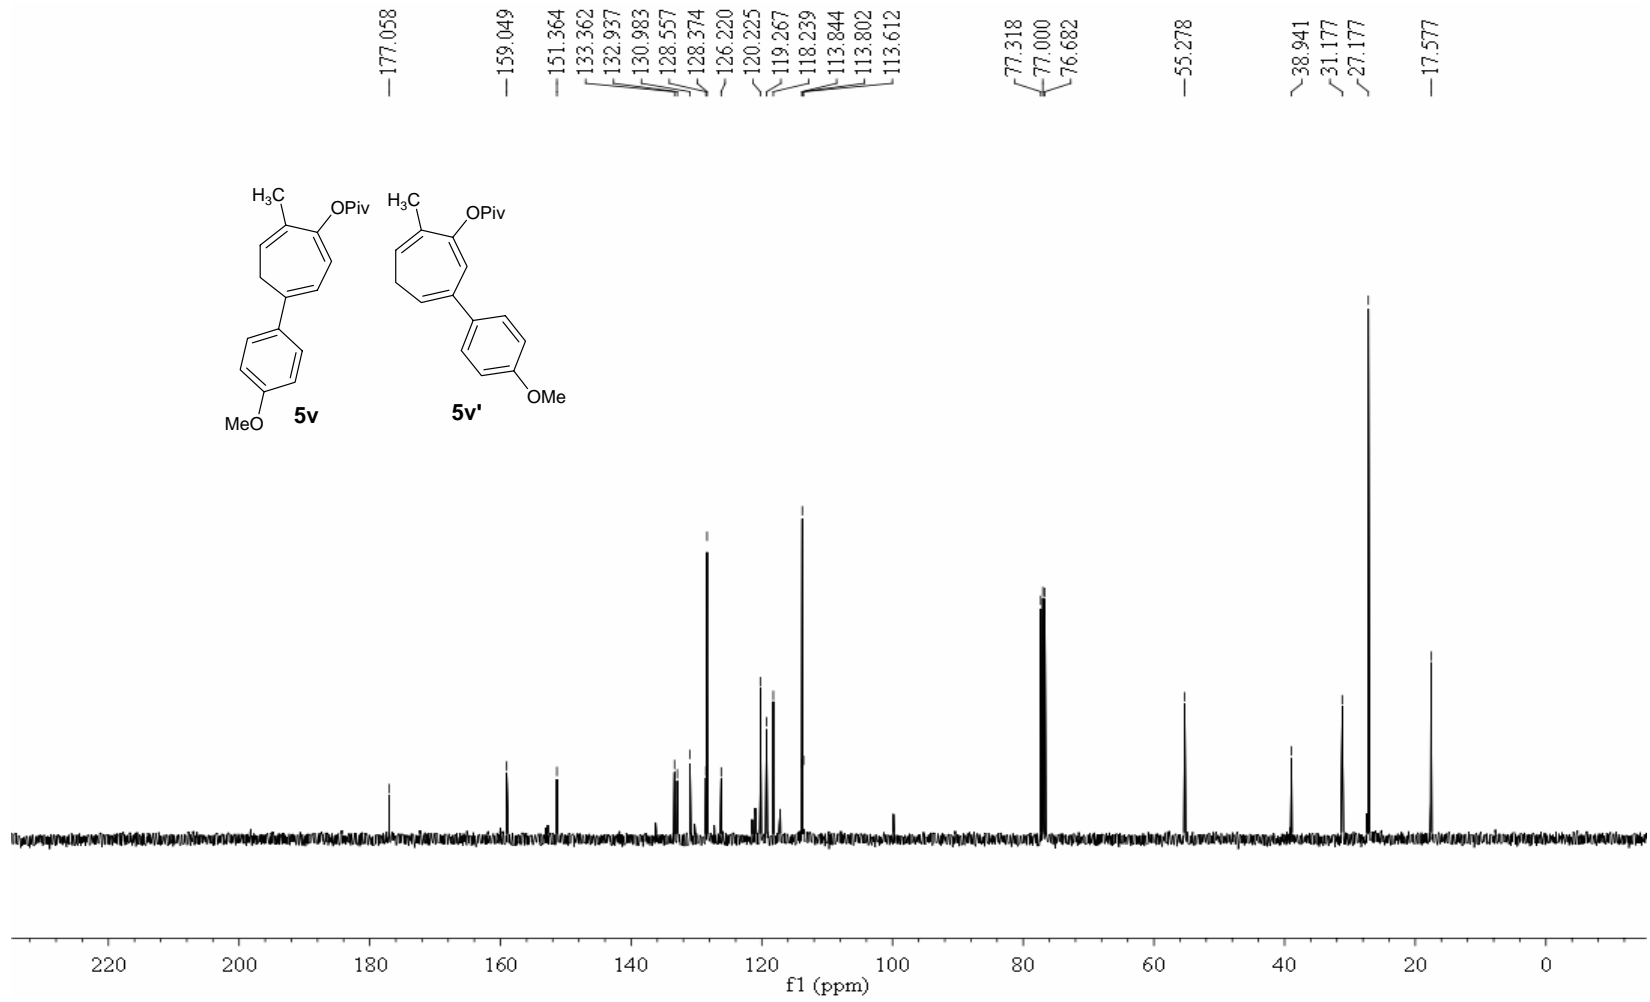

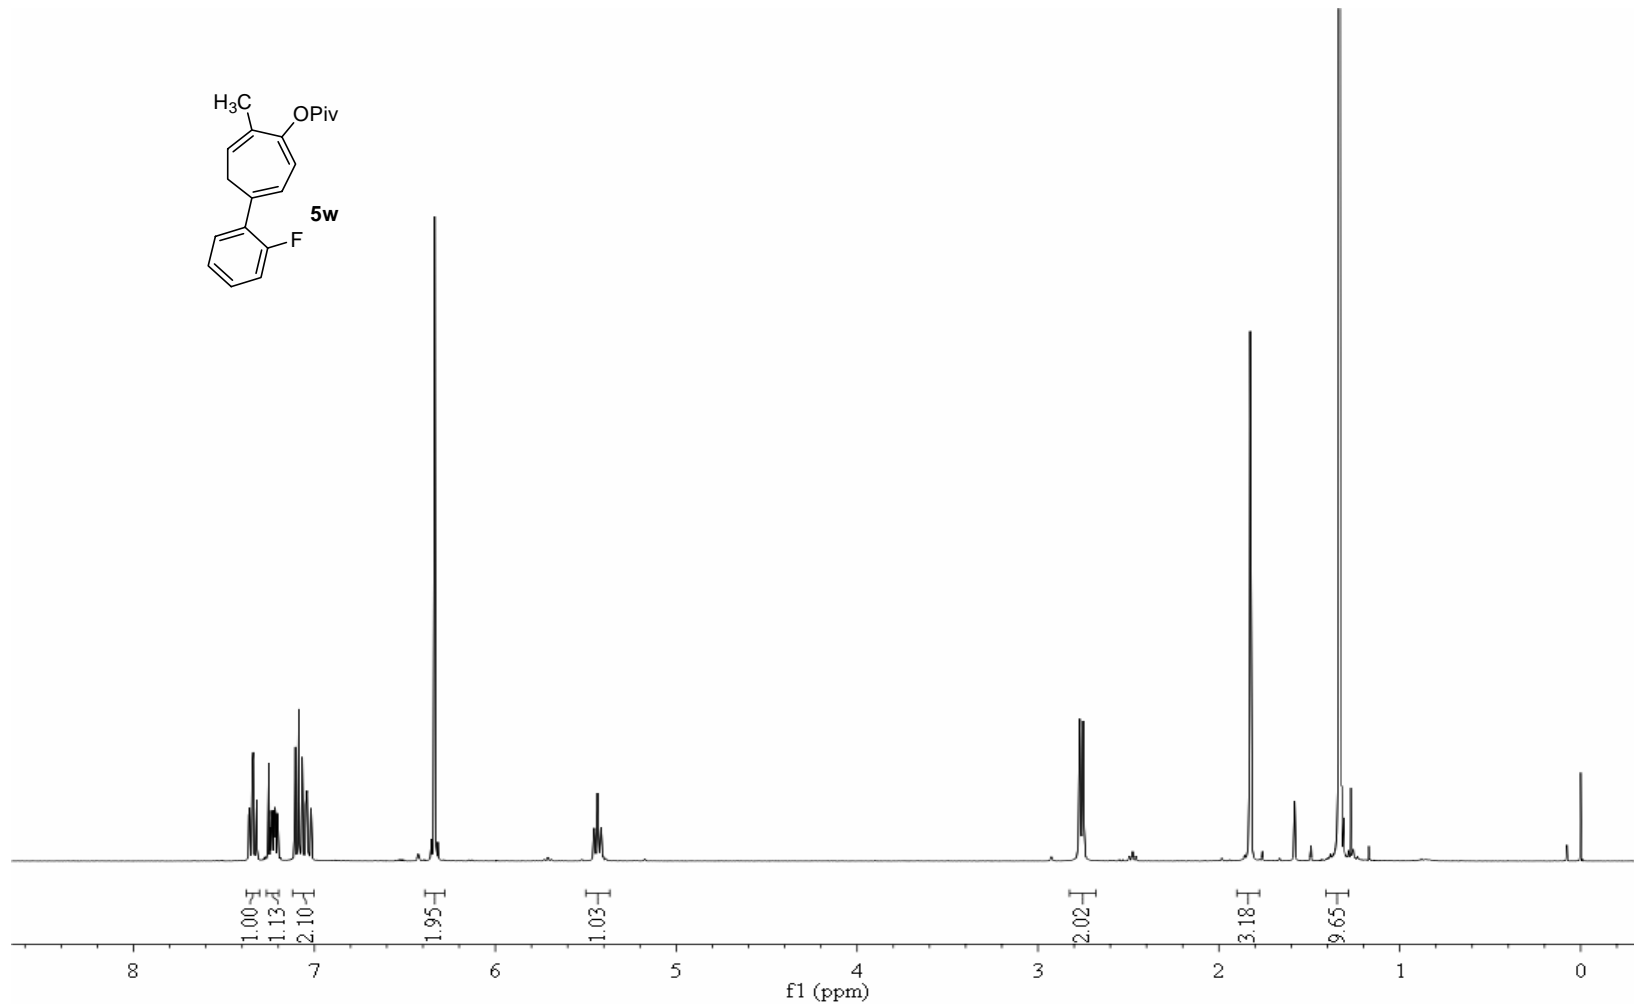

S155

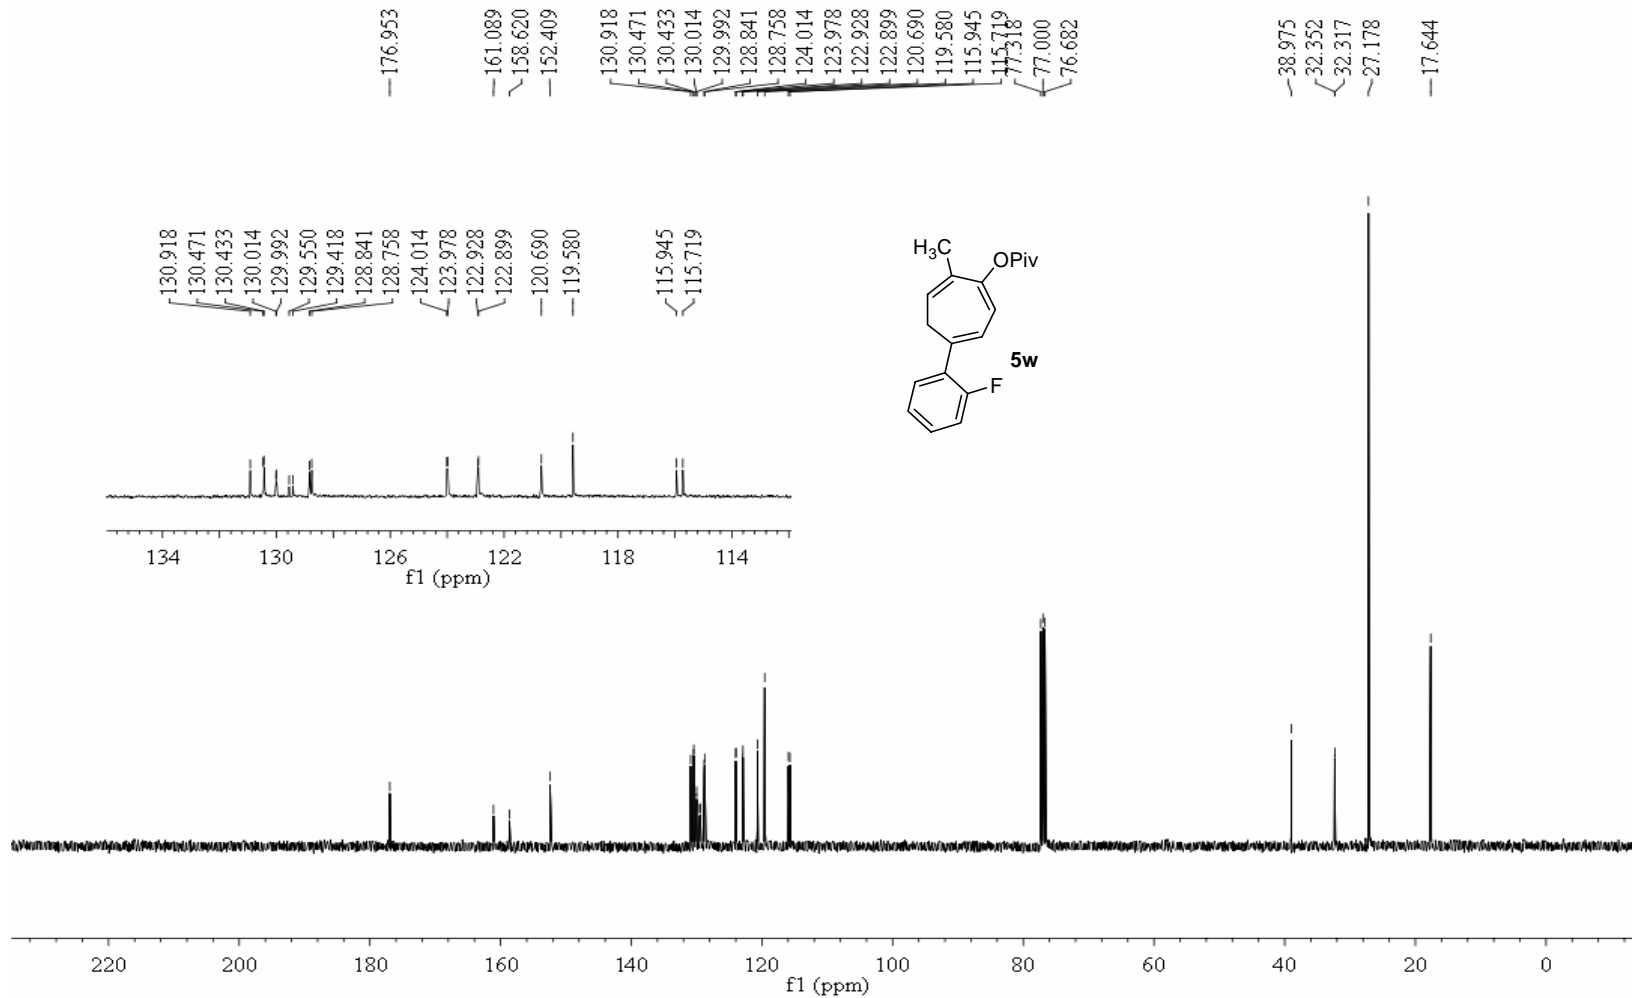

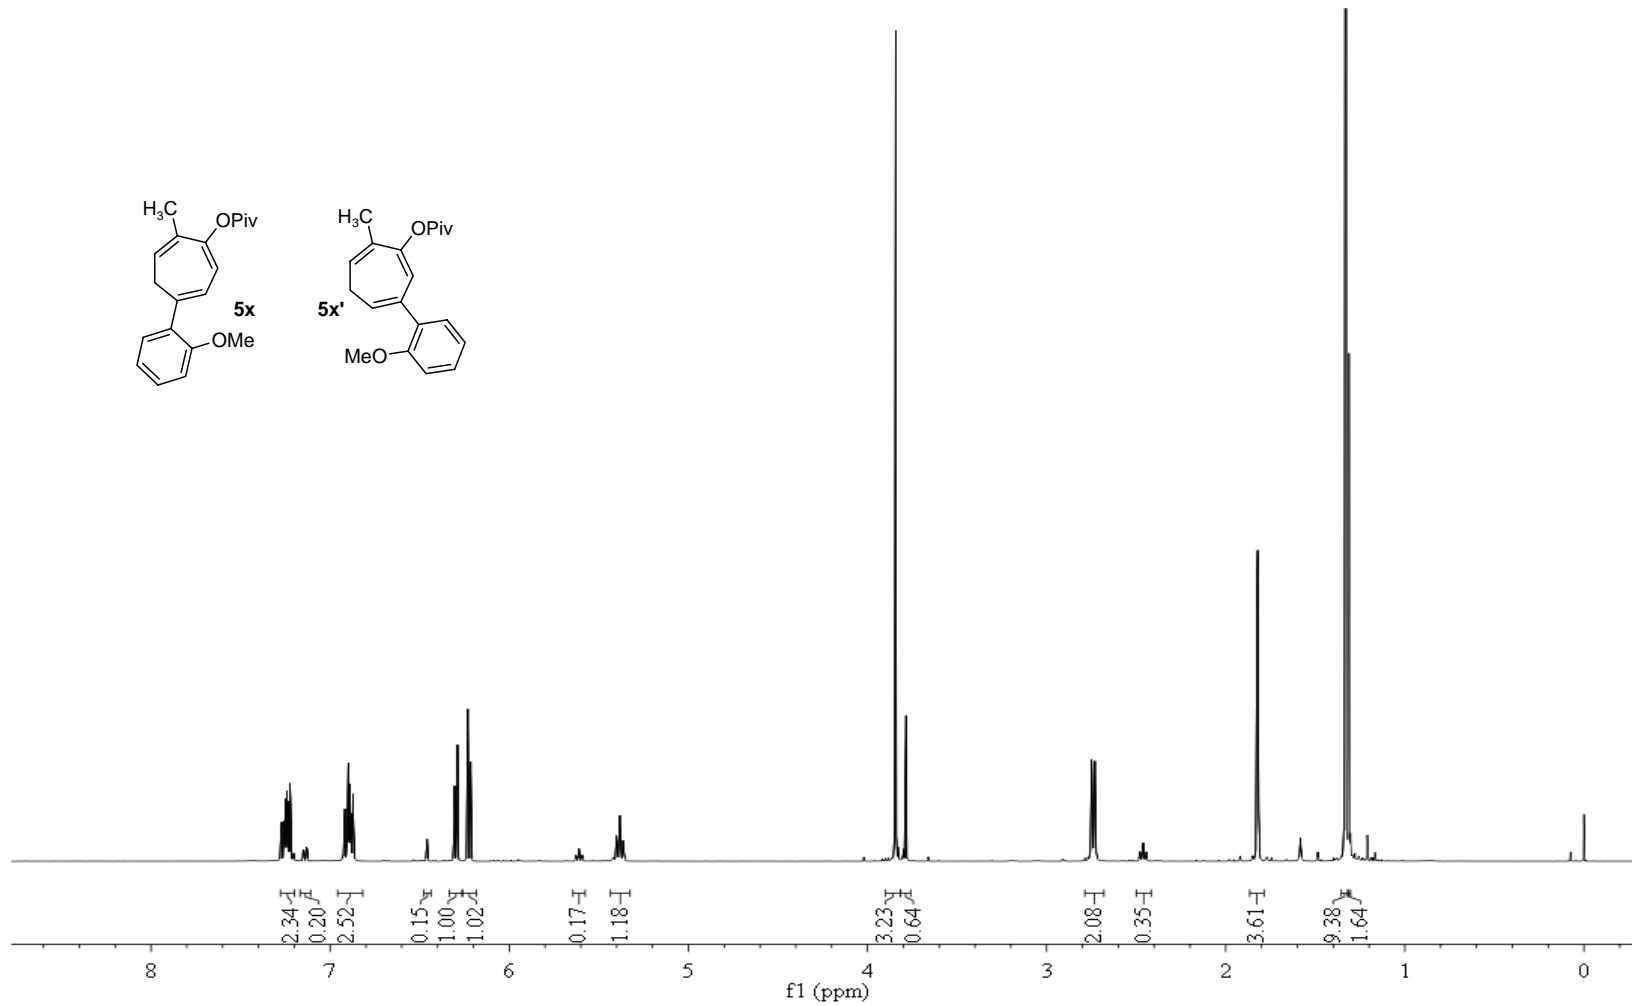

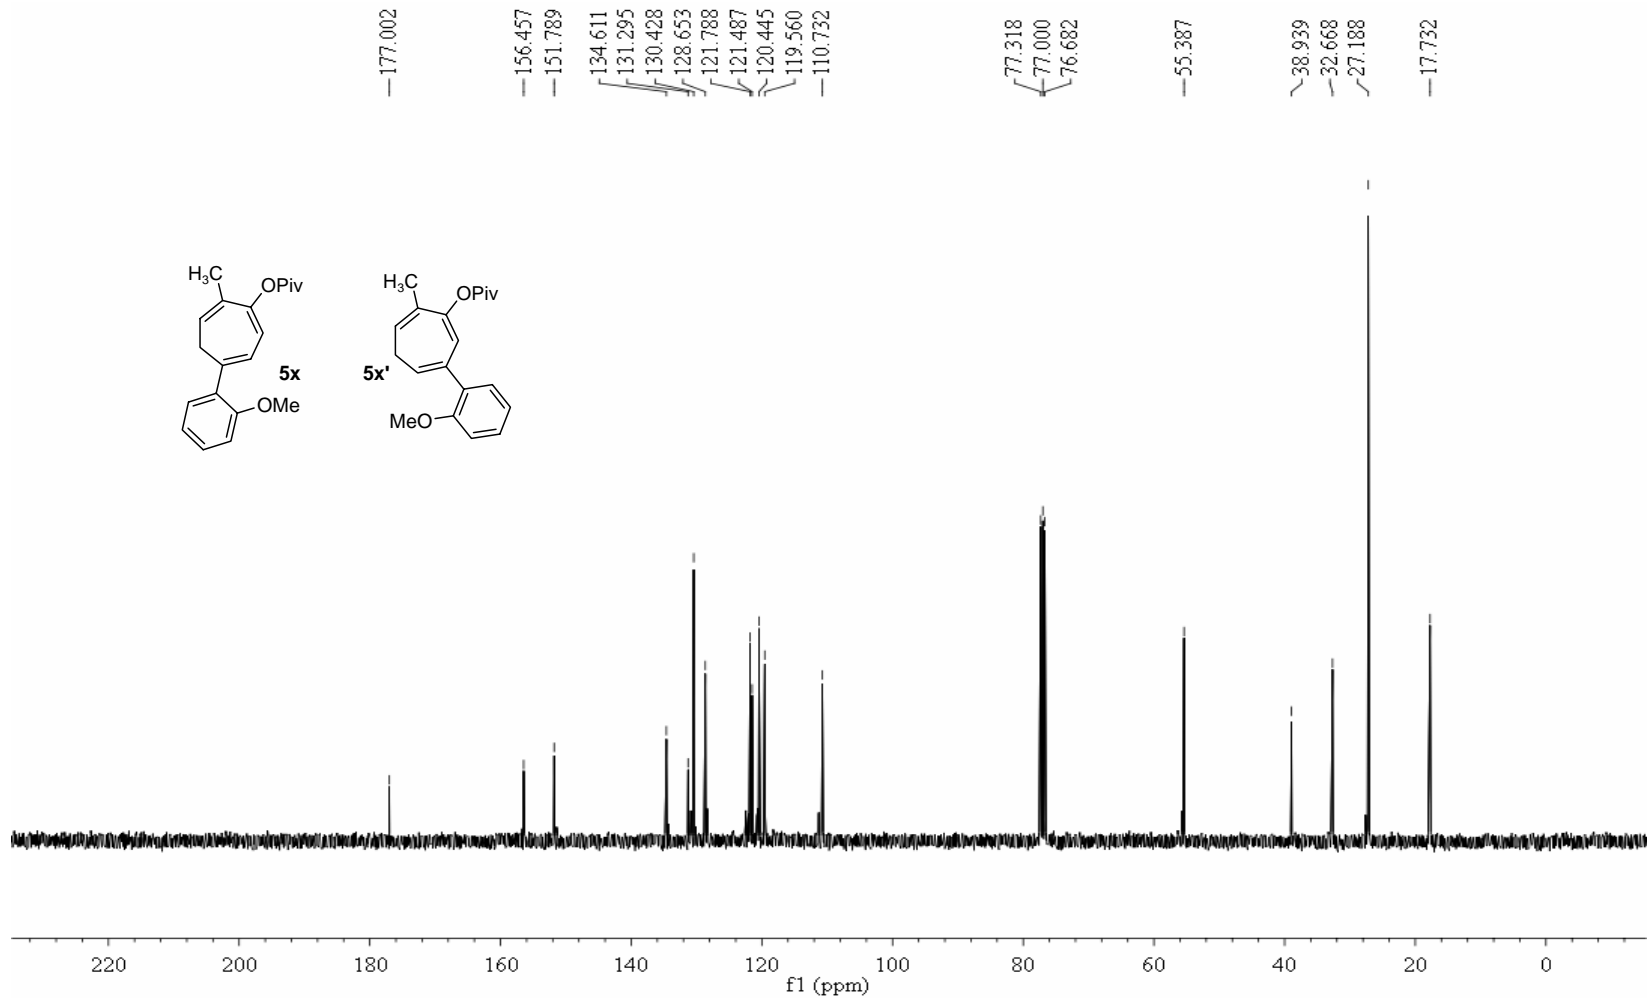

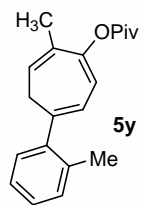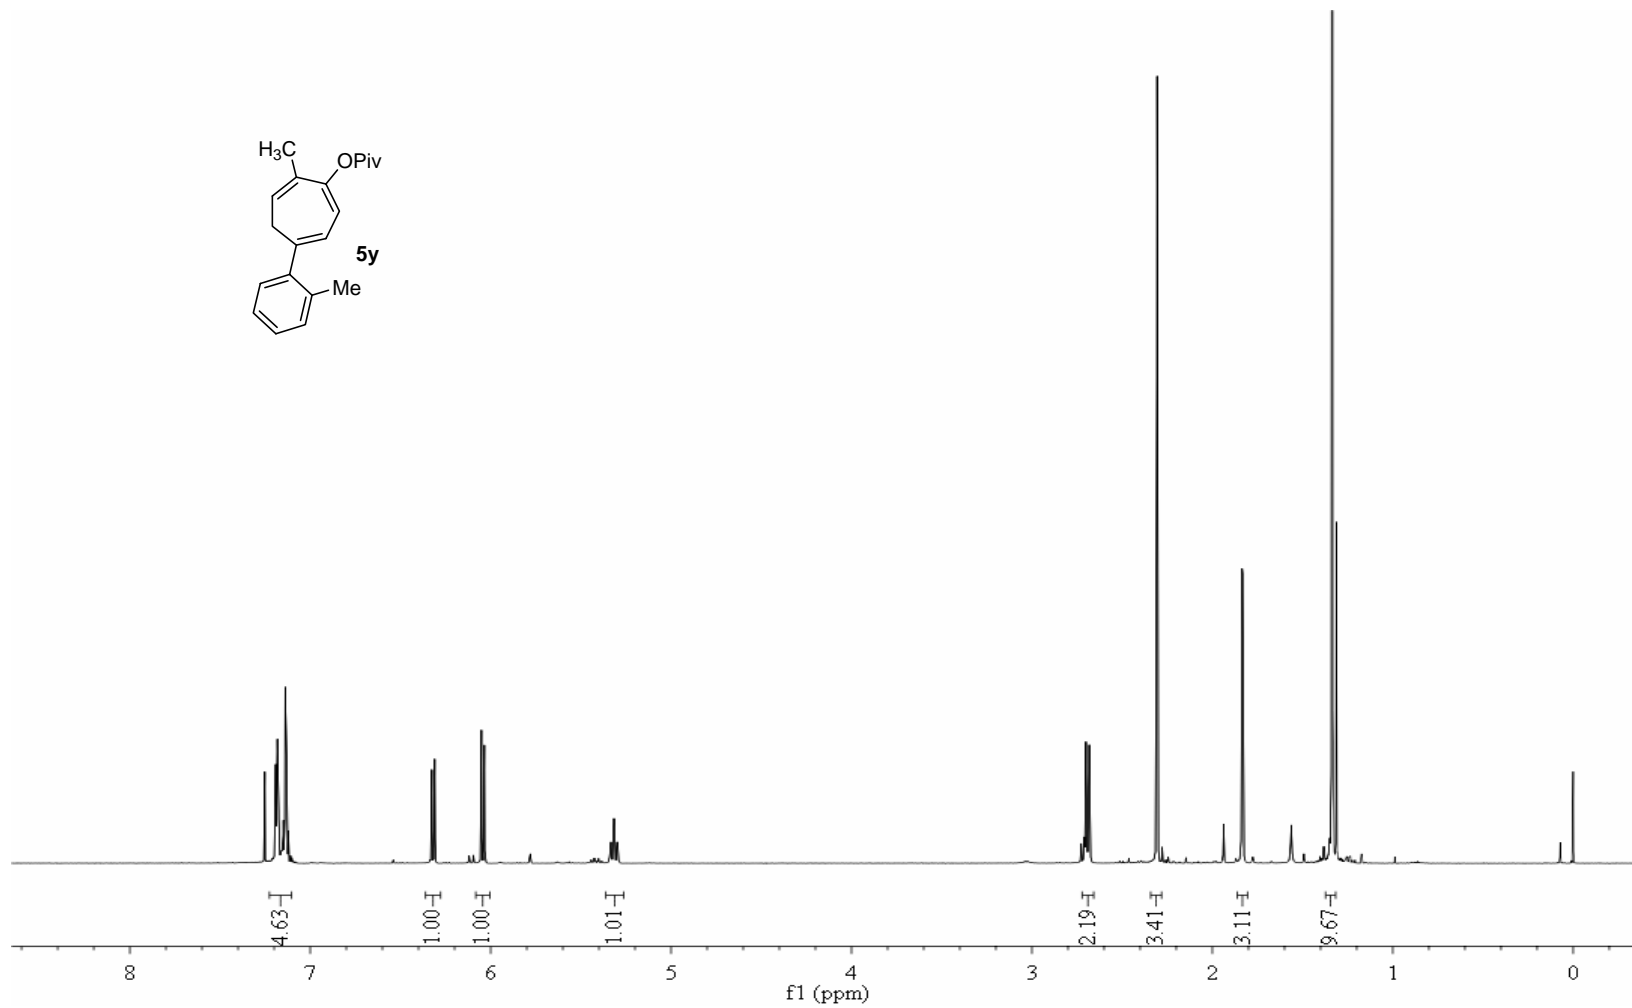

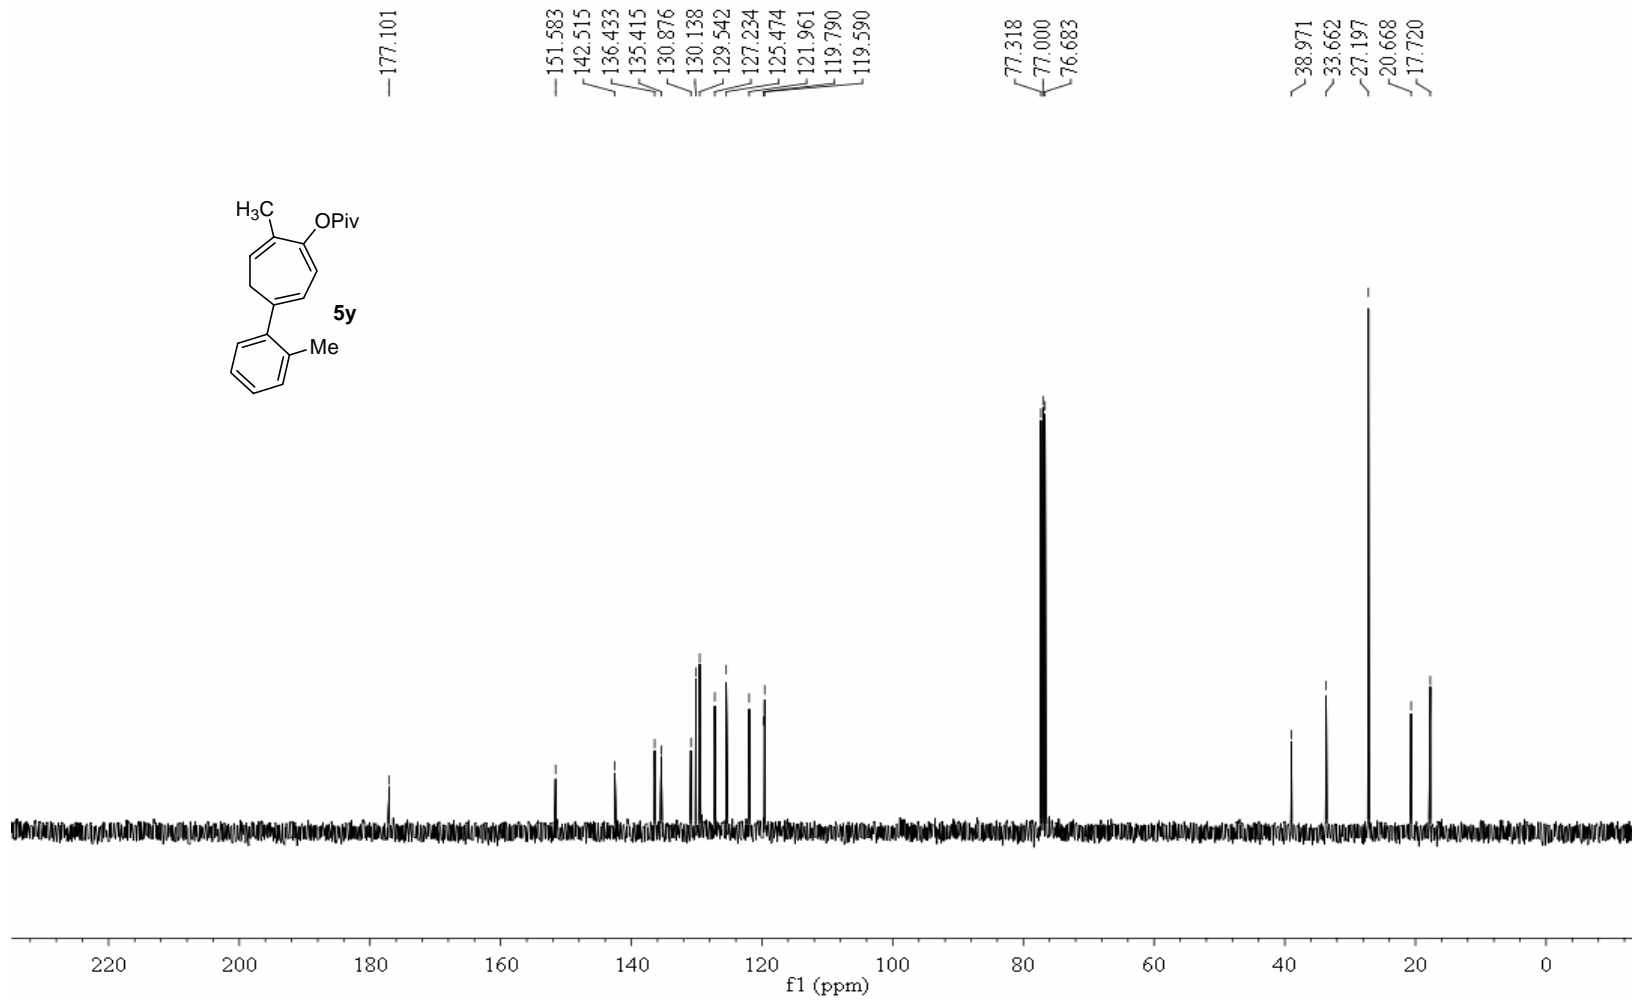



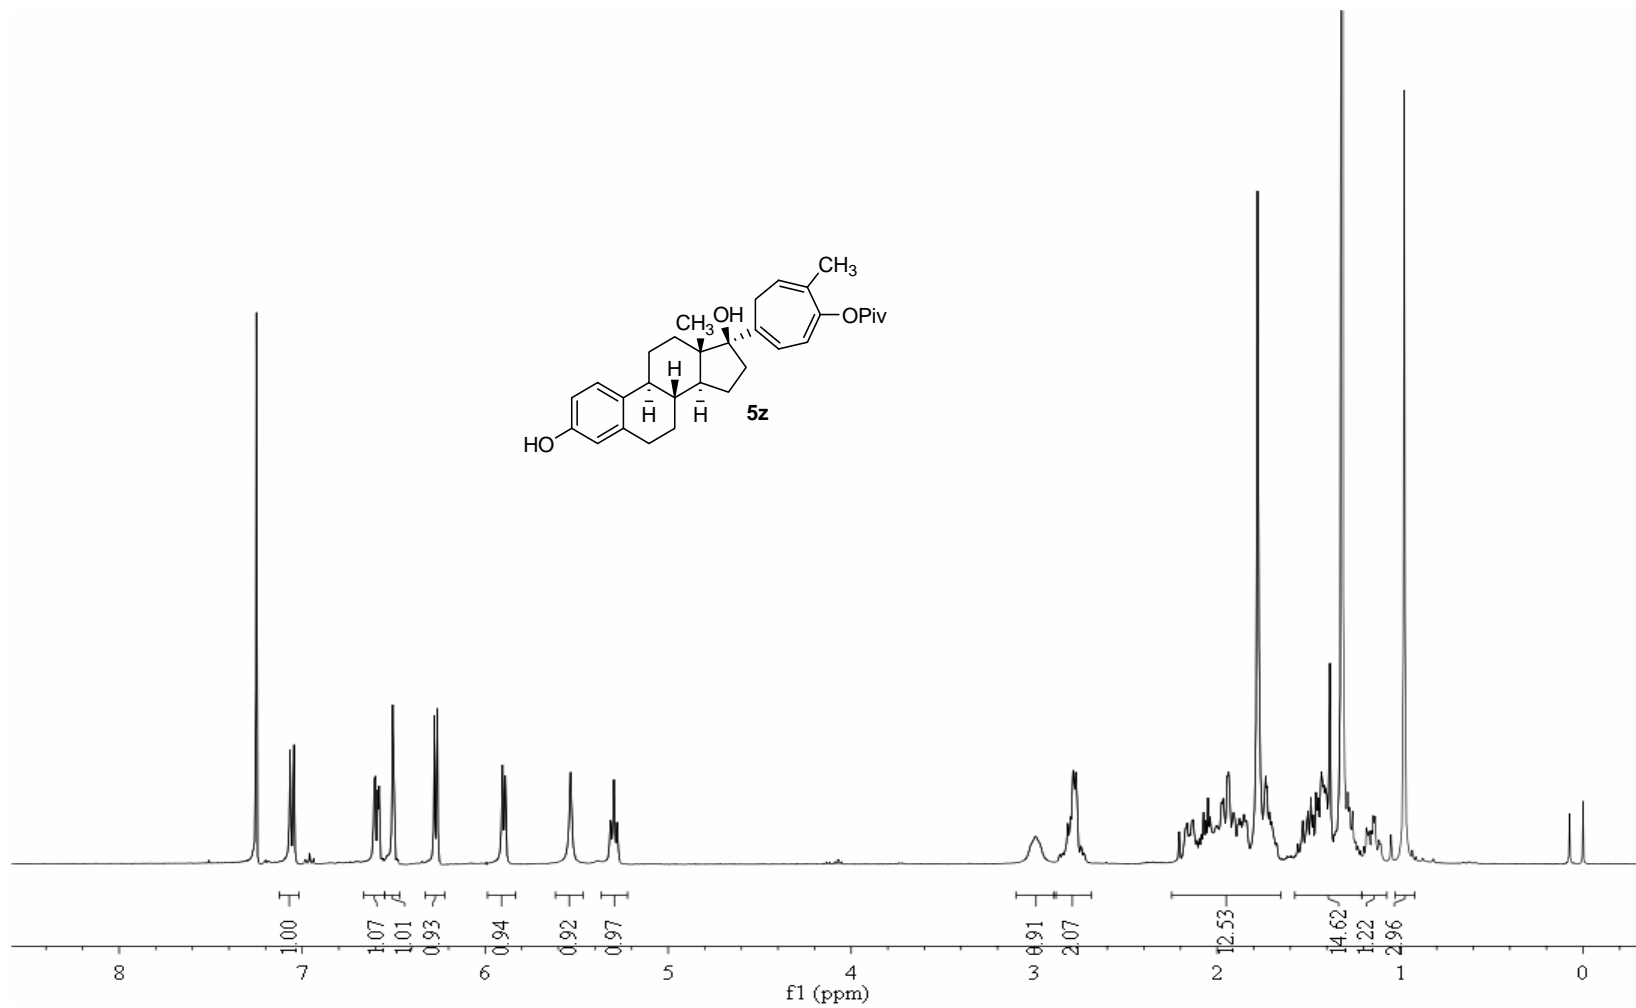

S161

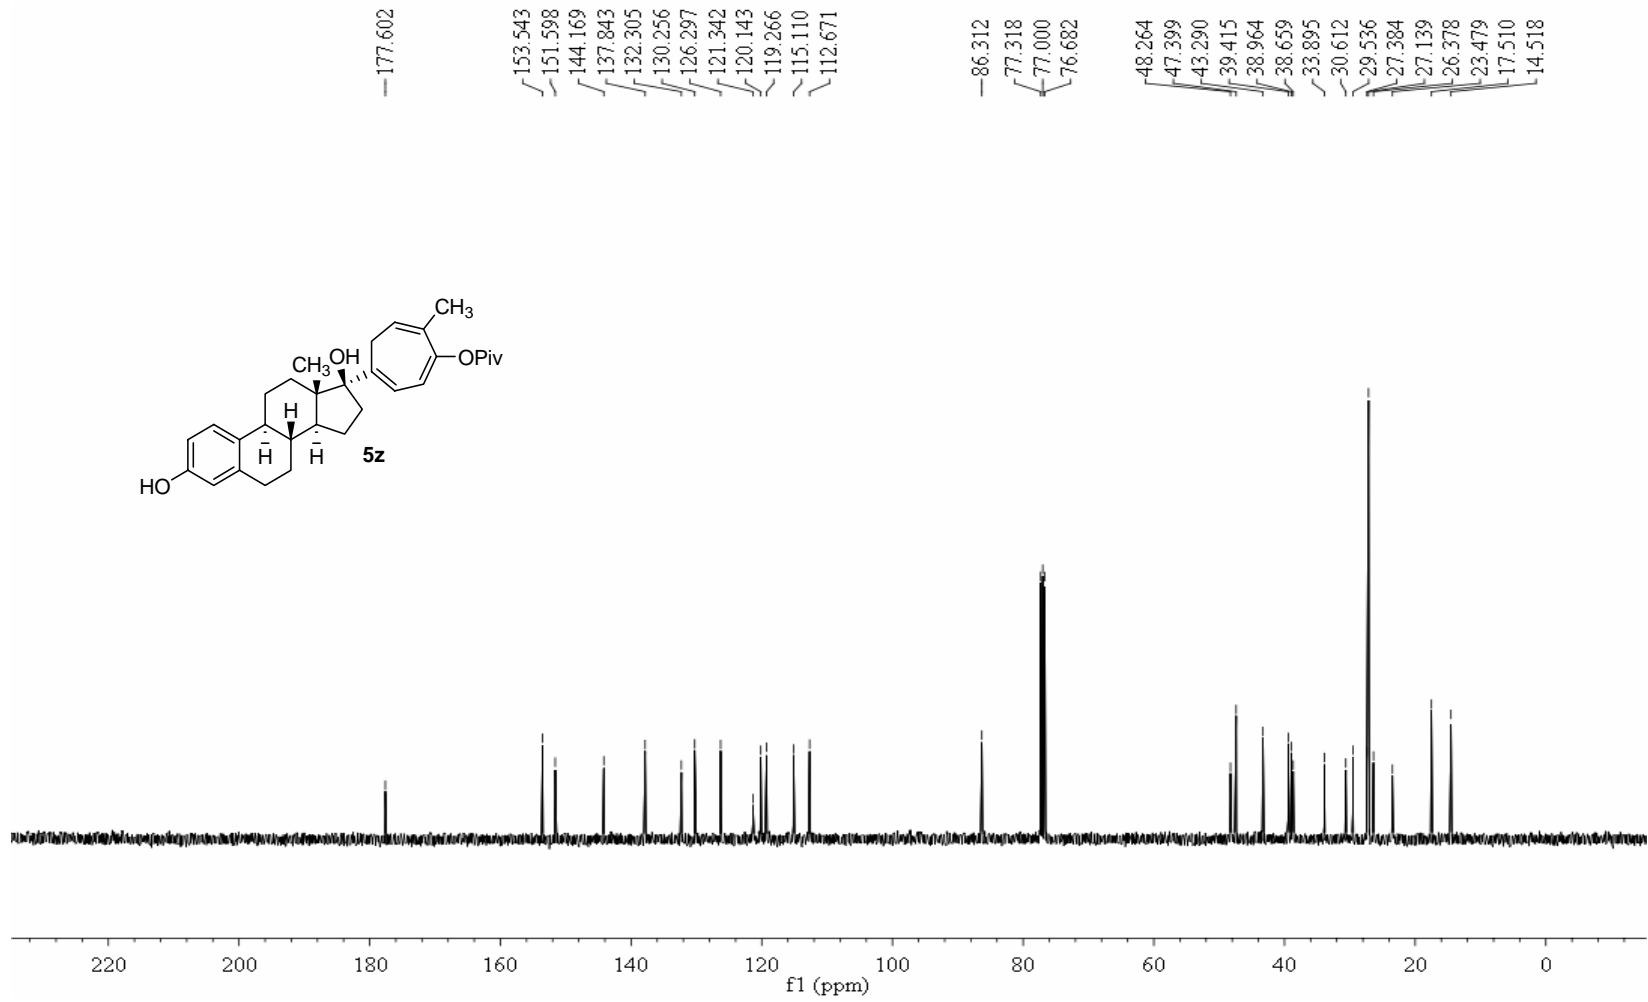

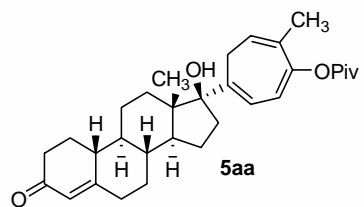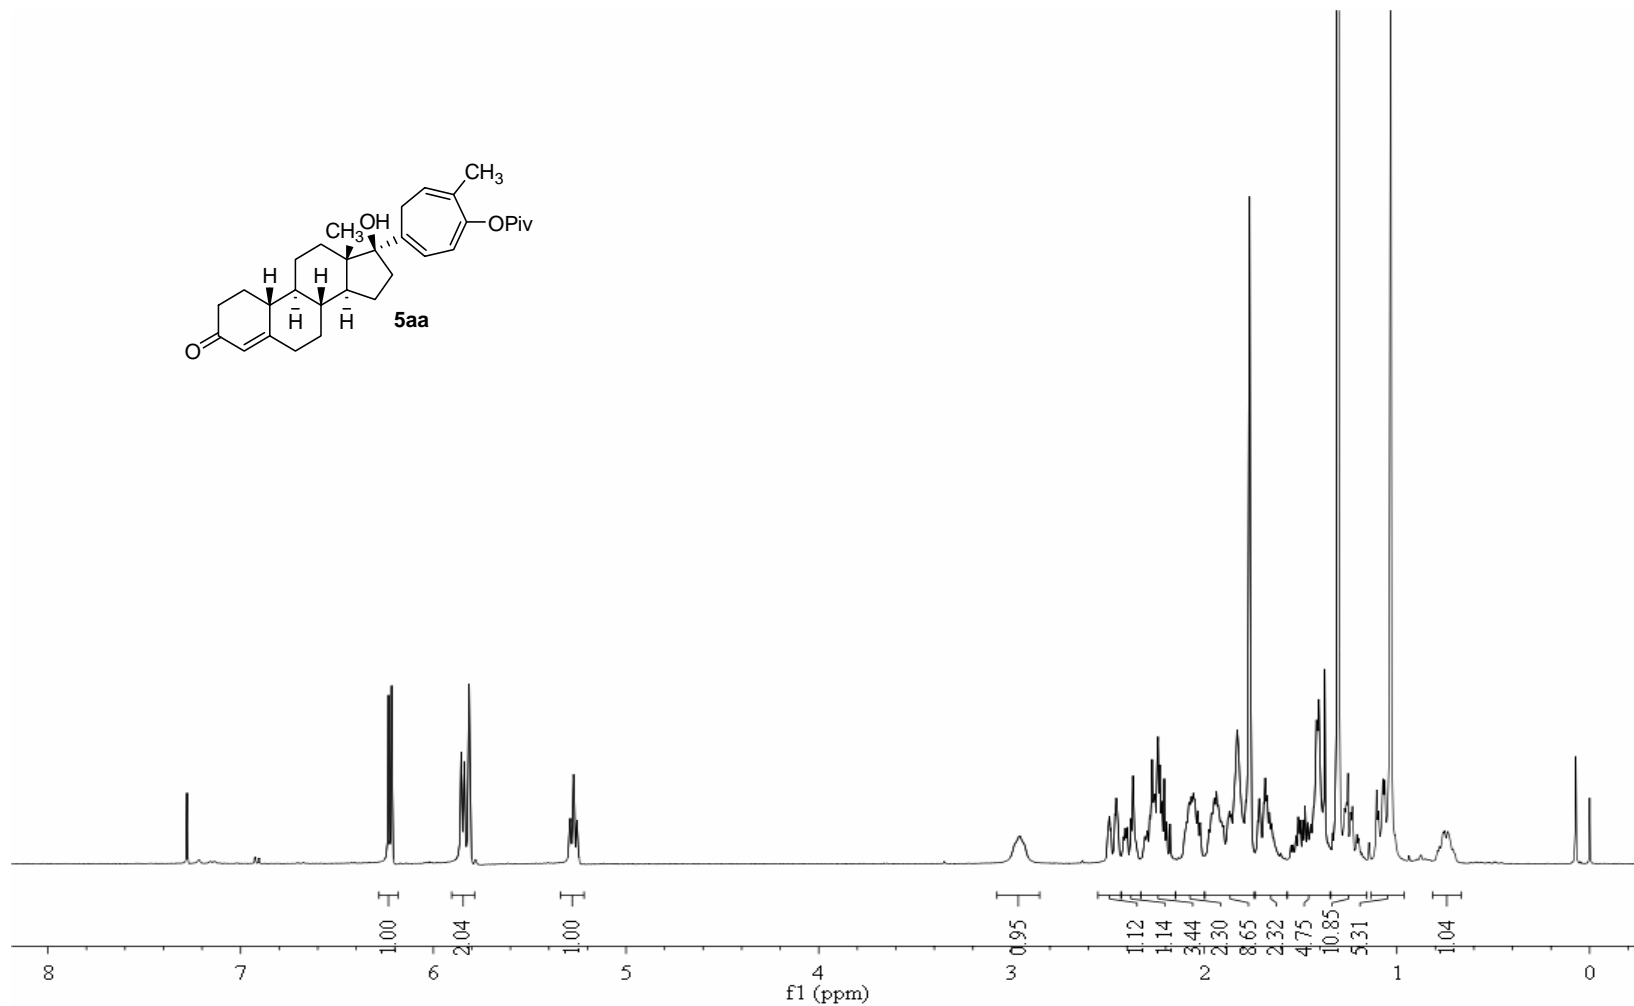

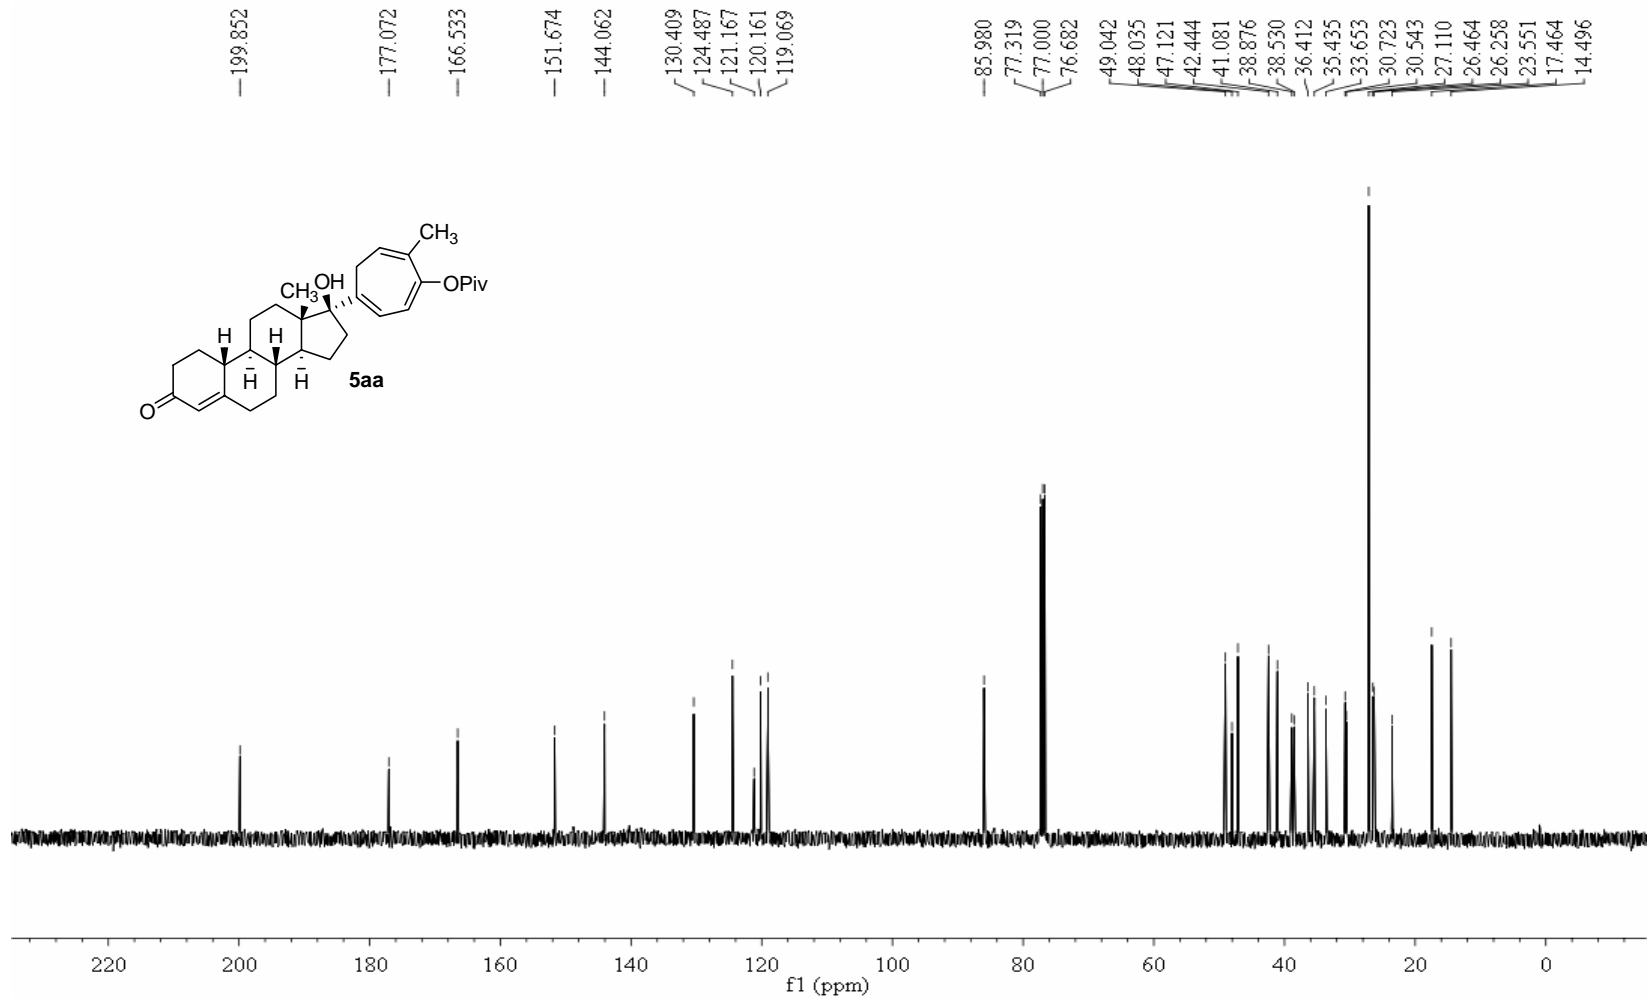

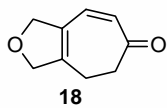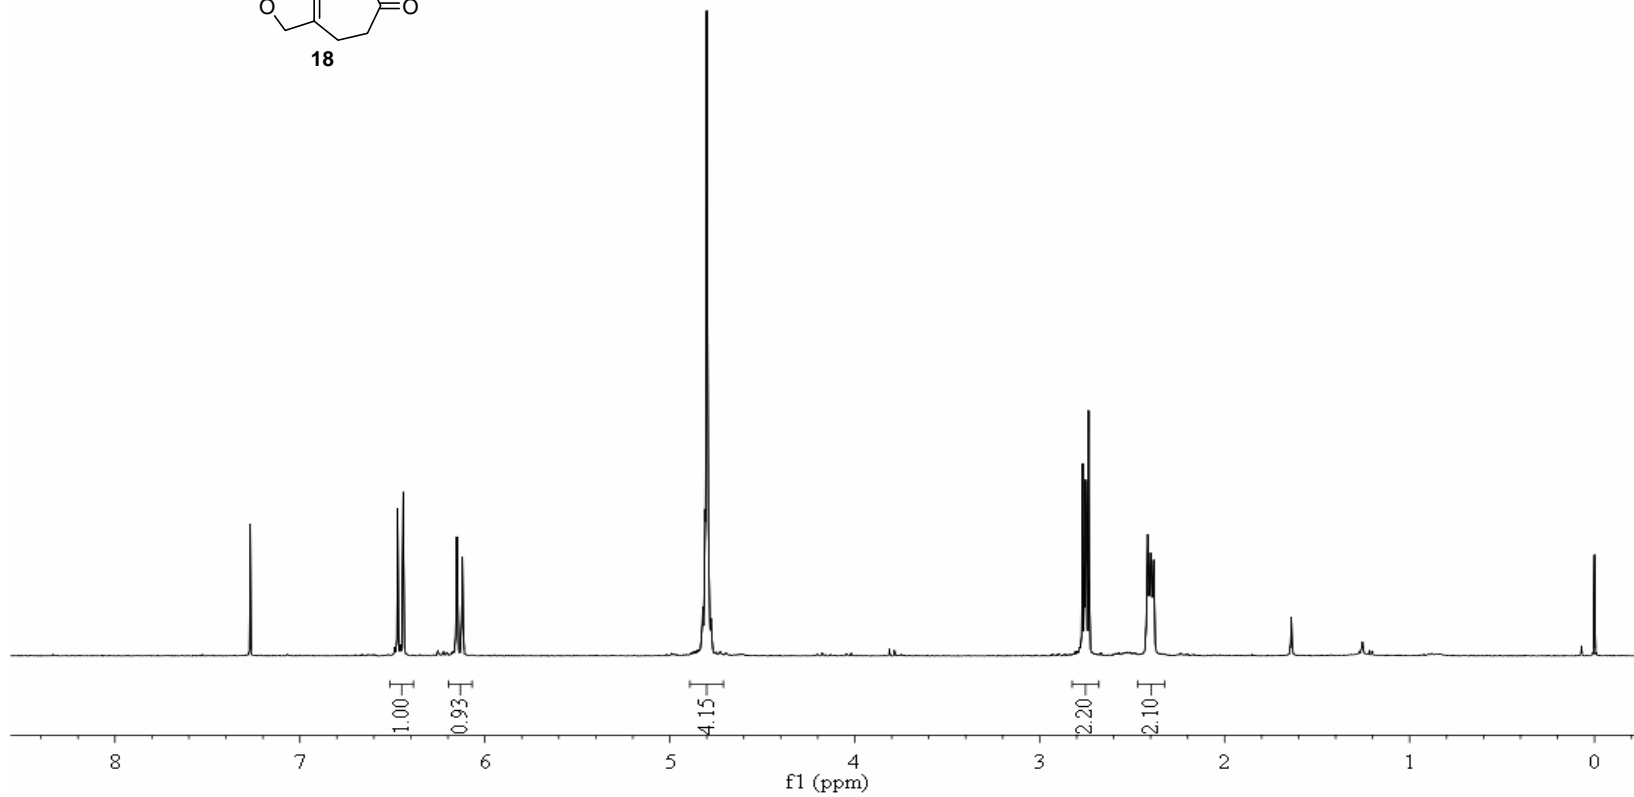

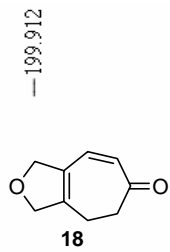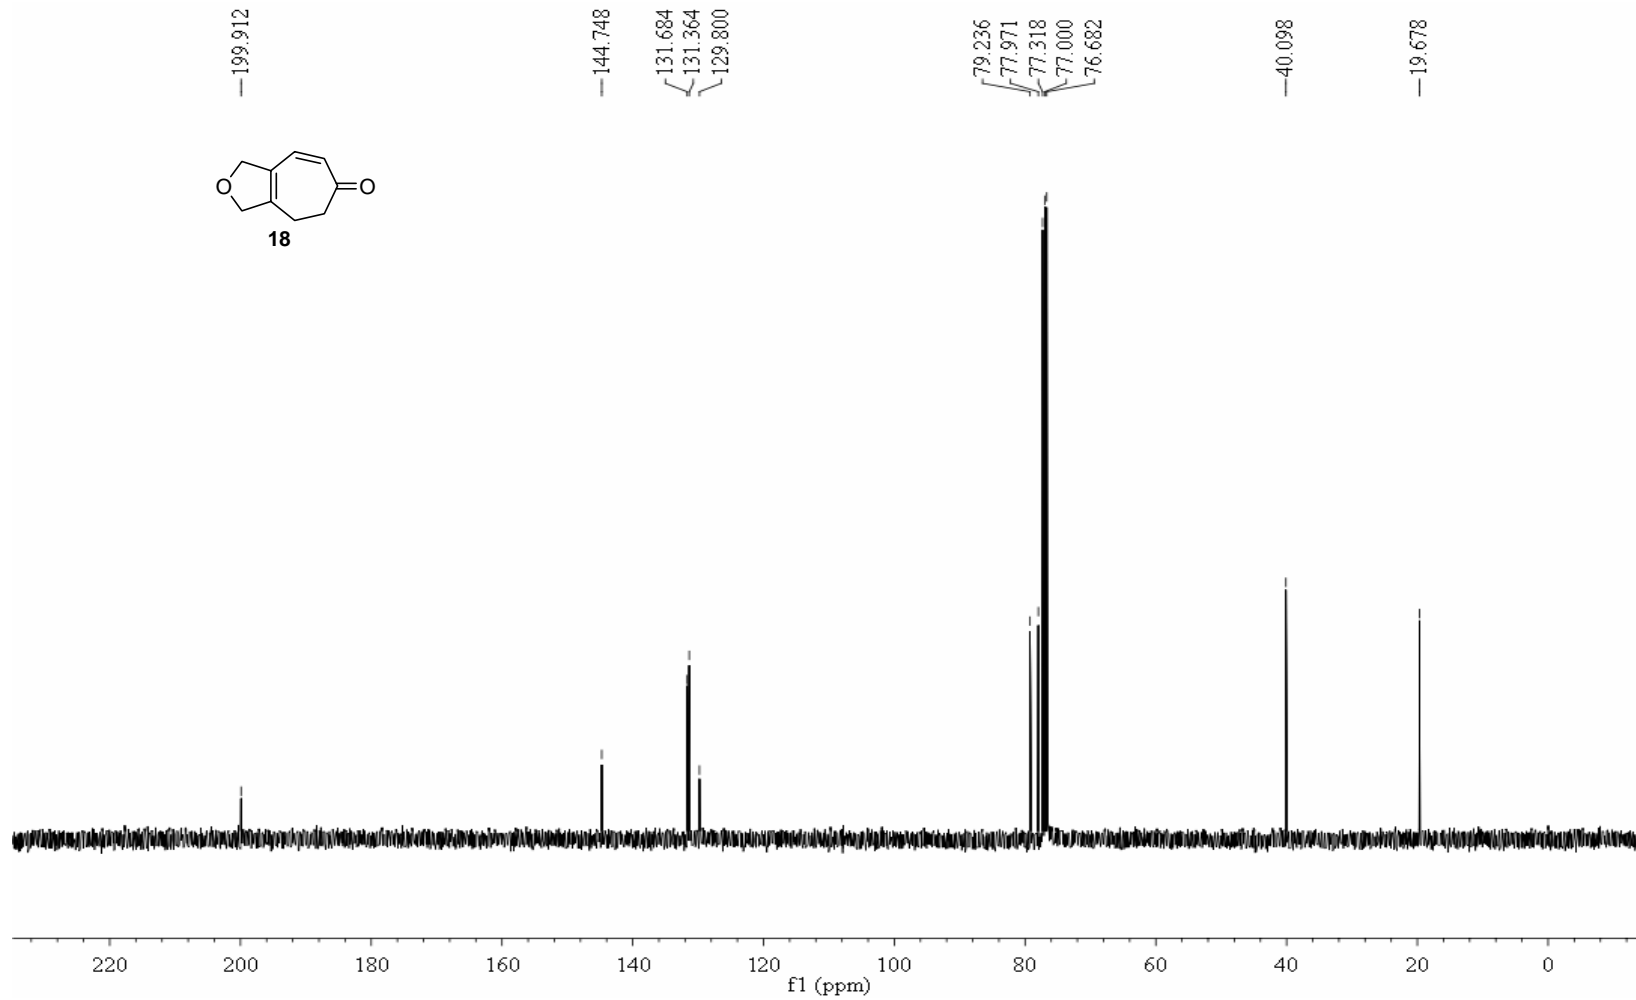

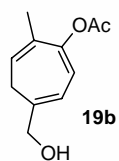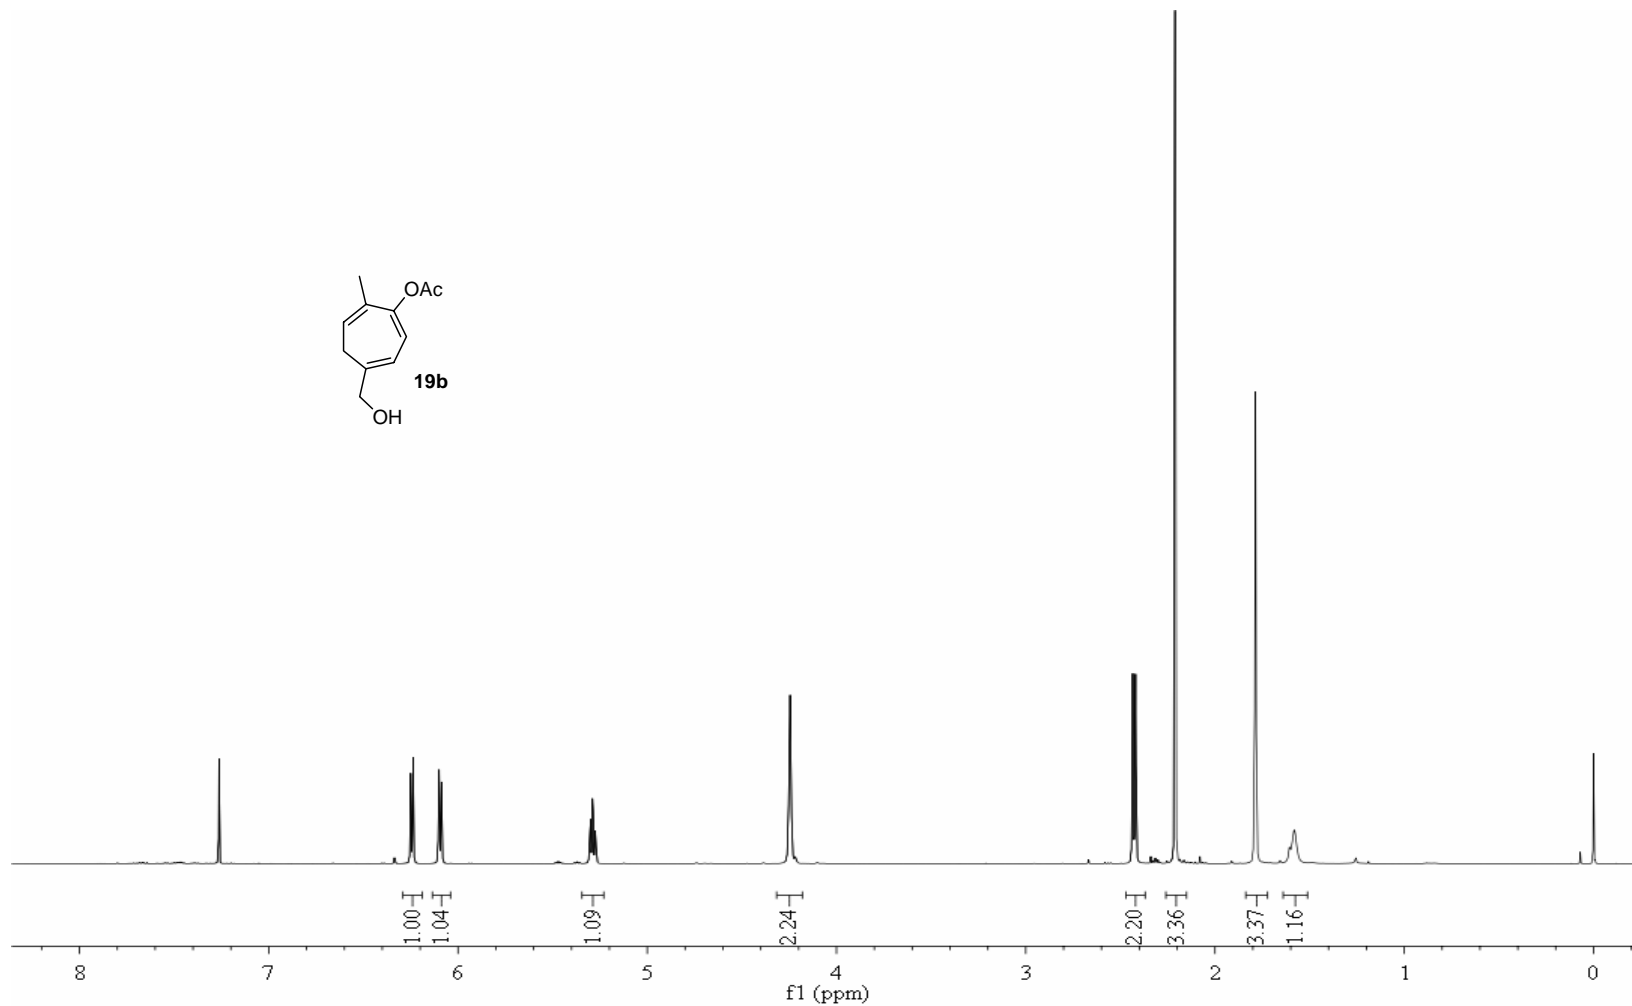

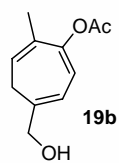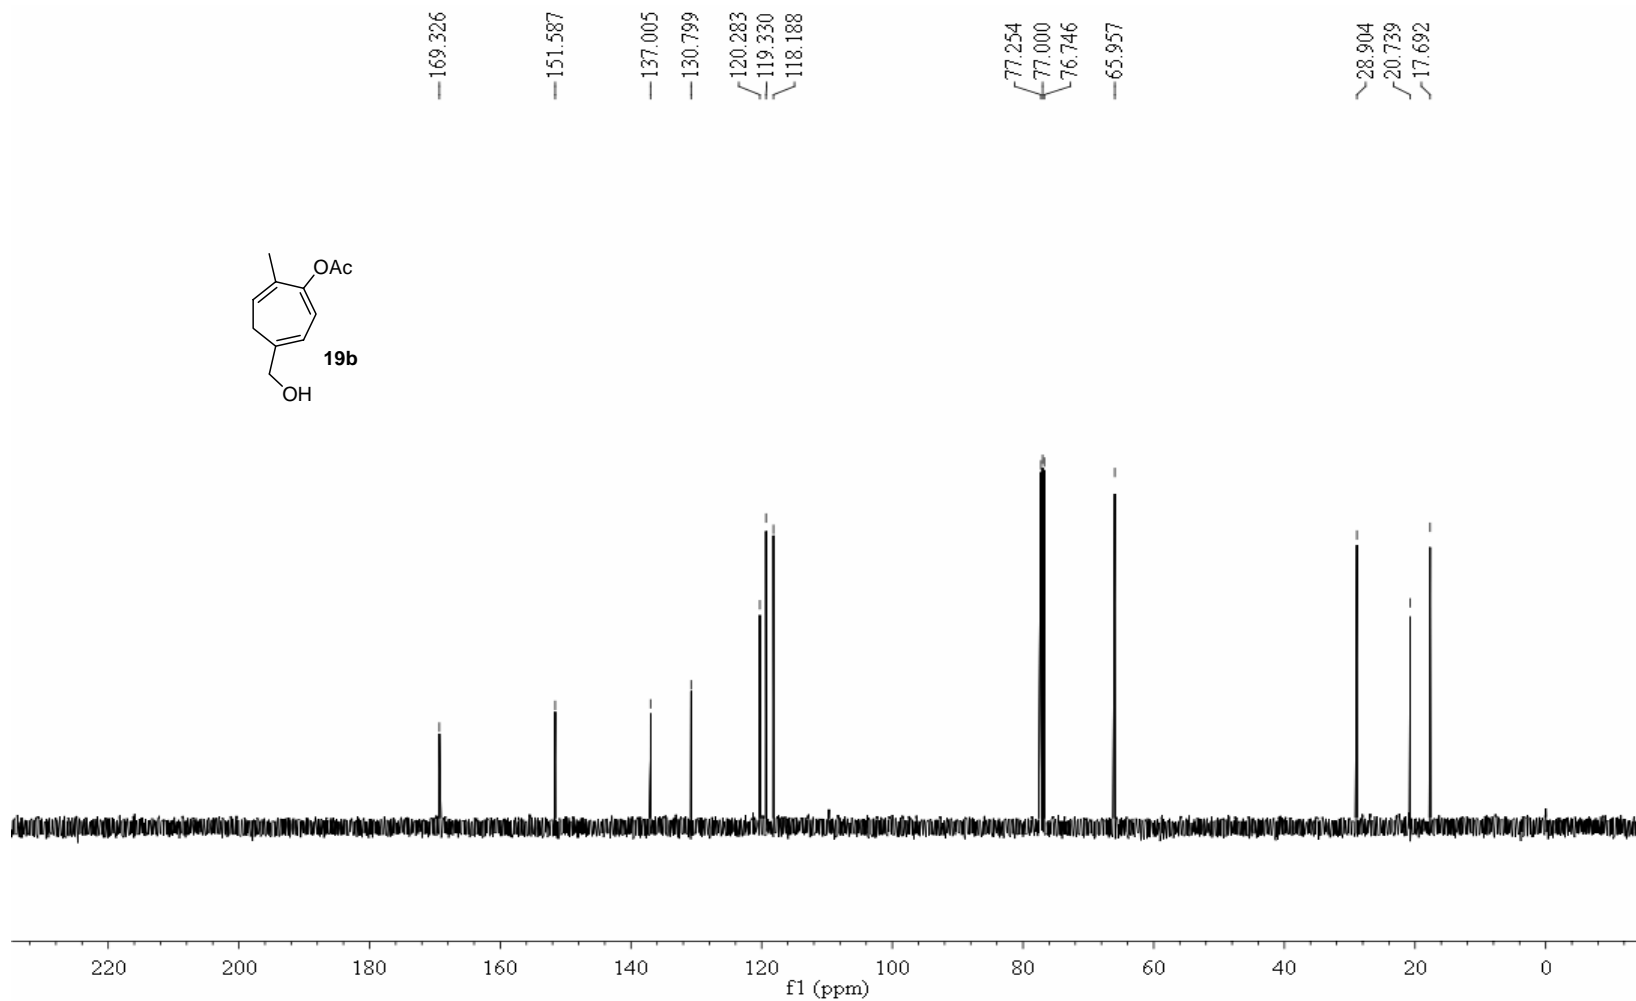



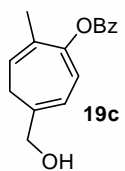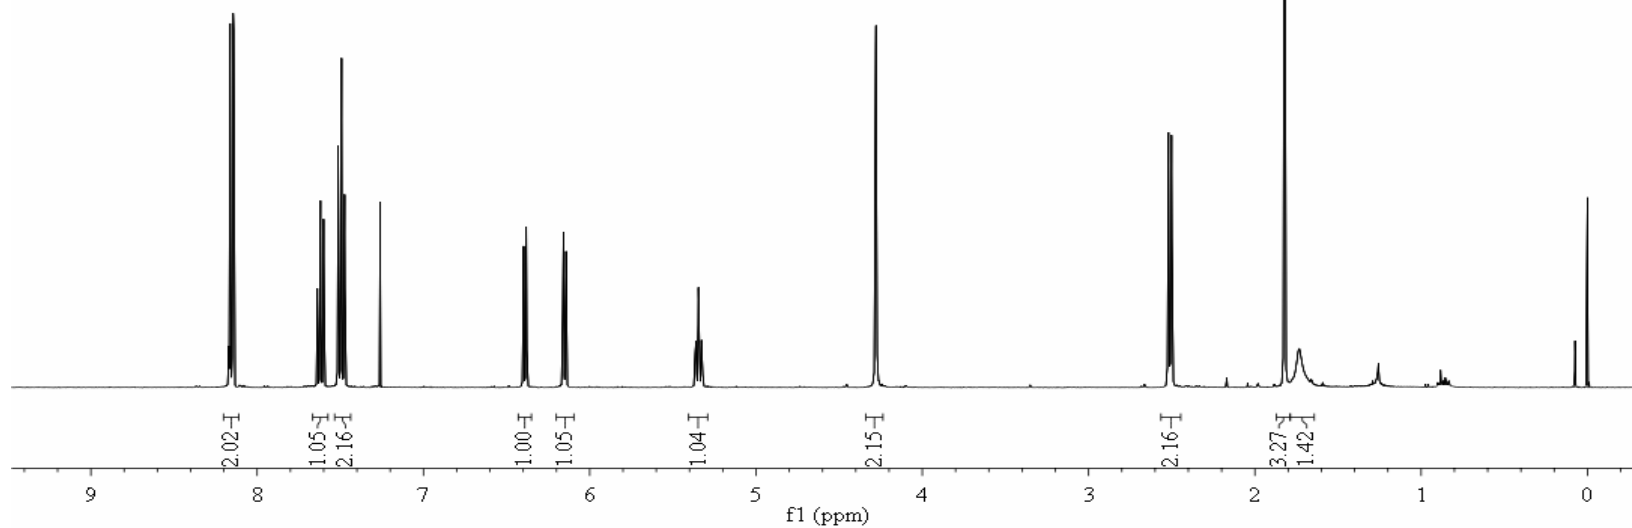

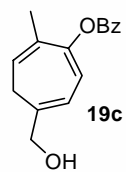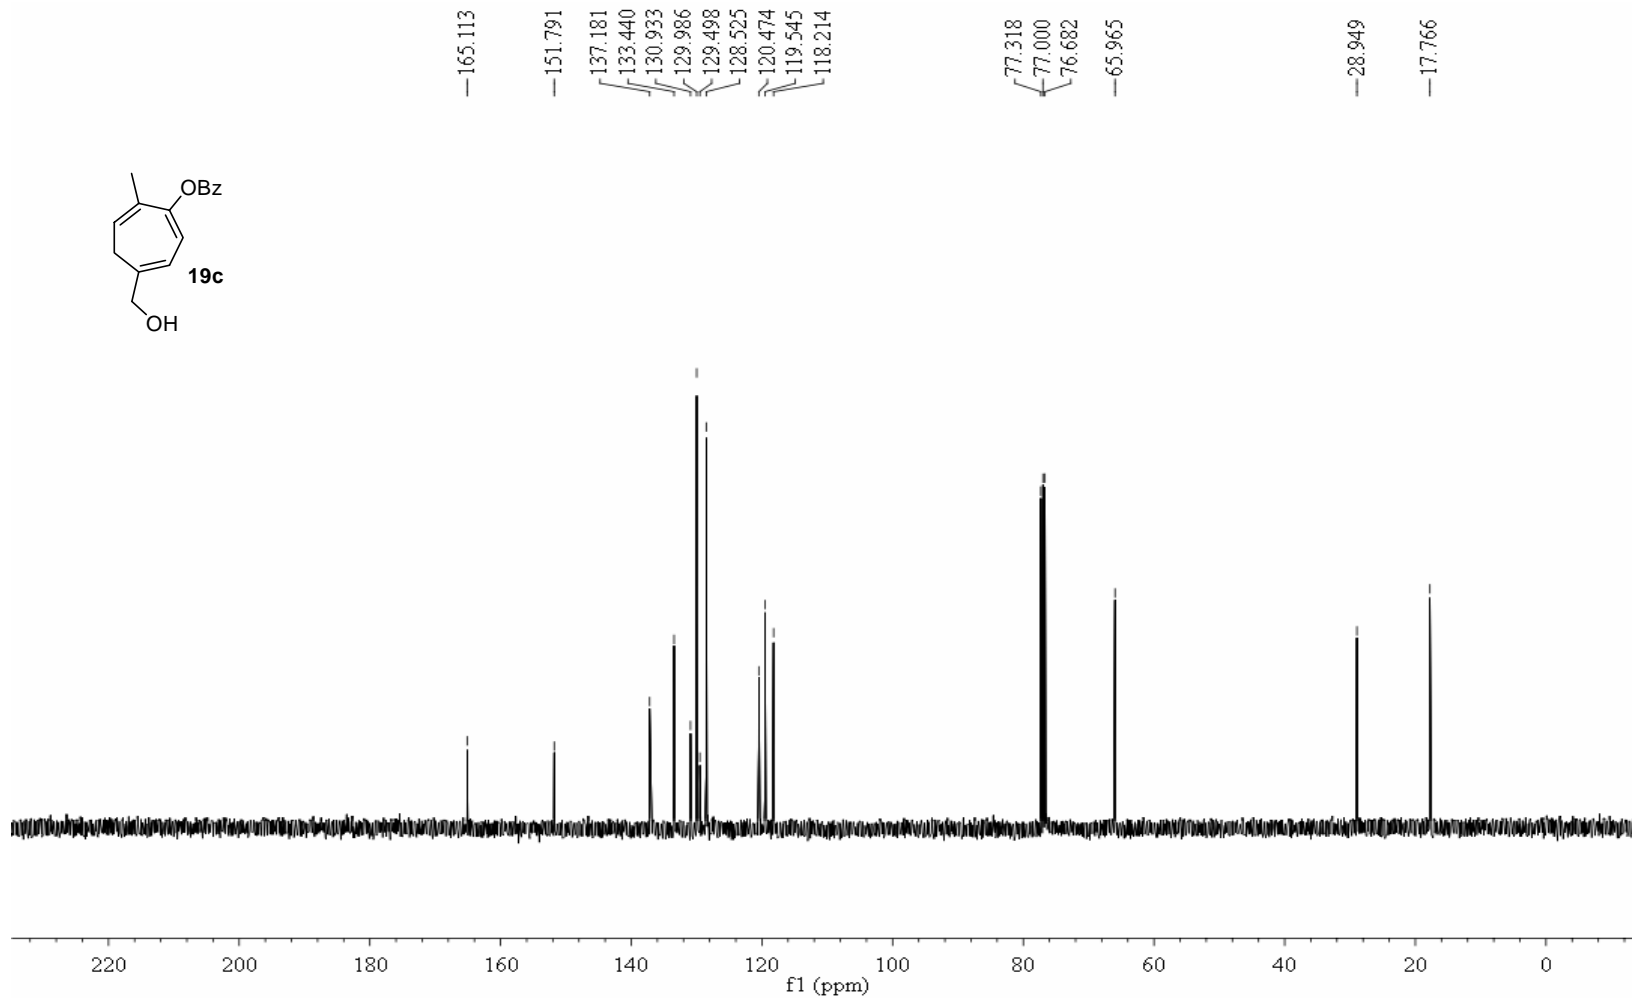

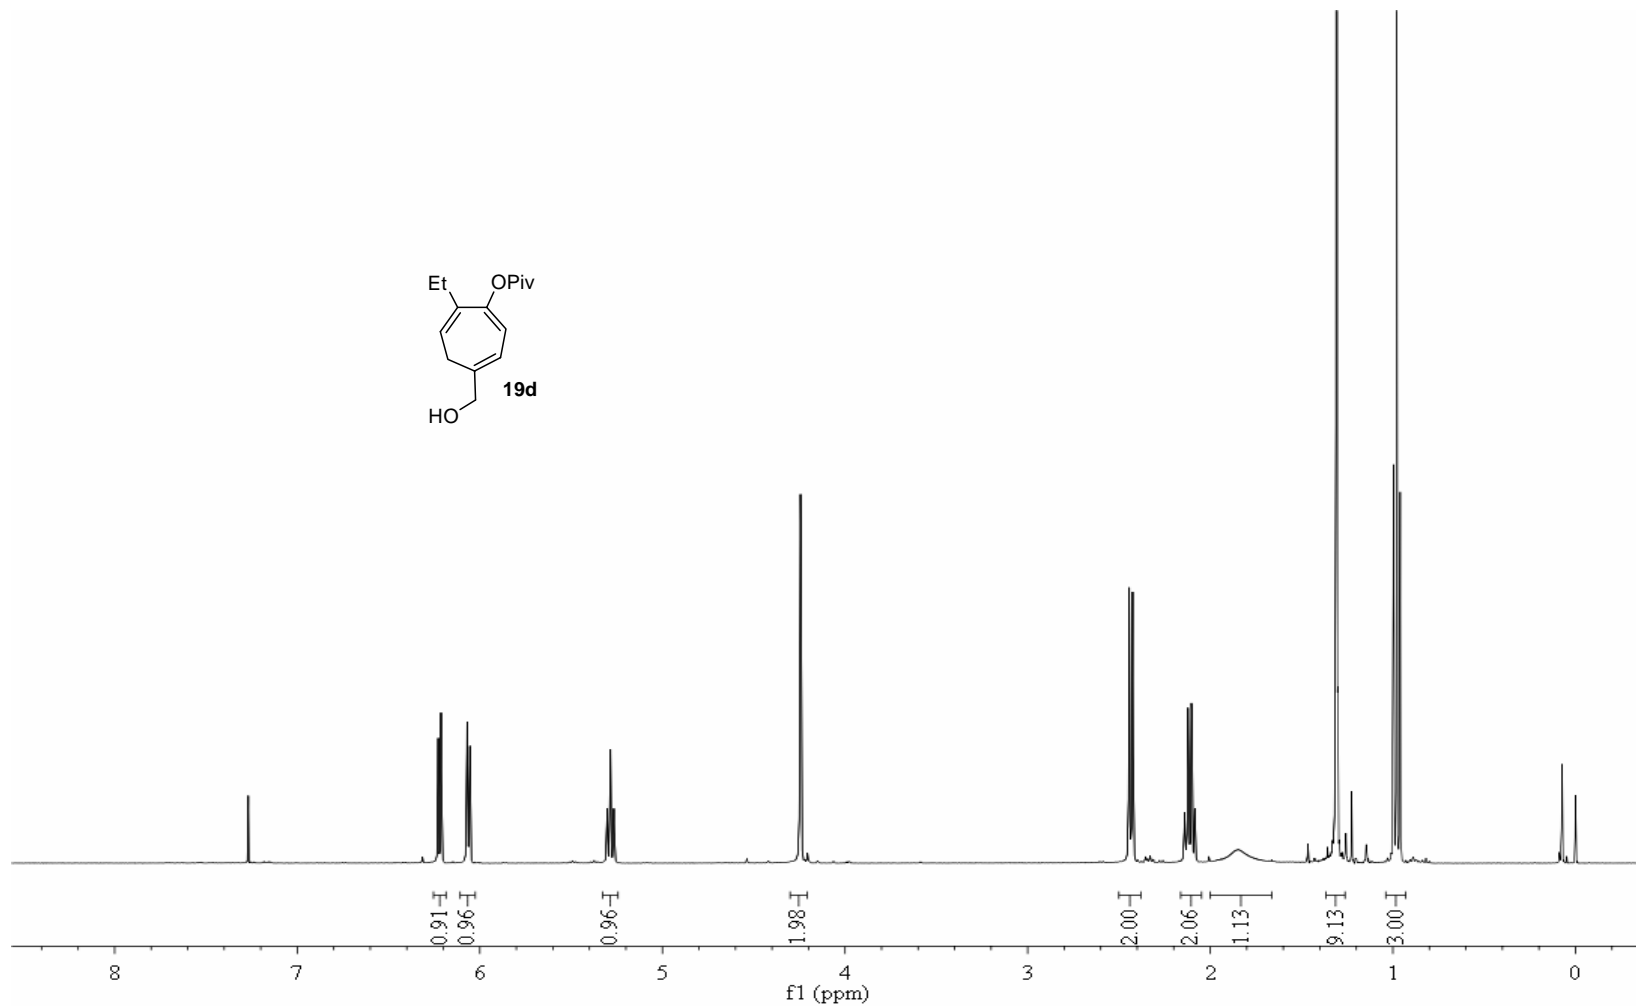

S171

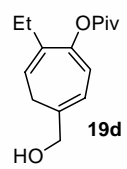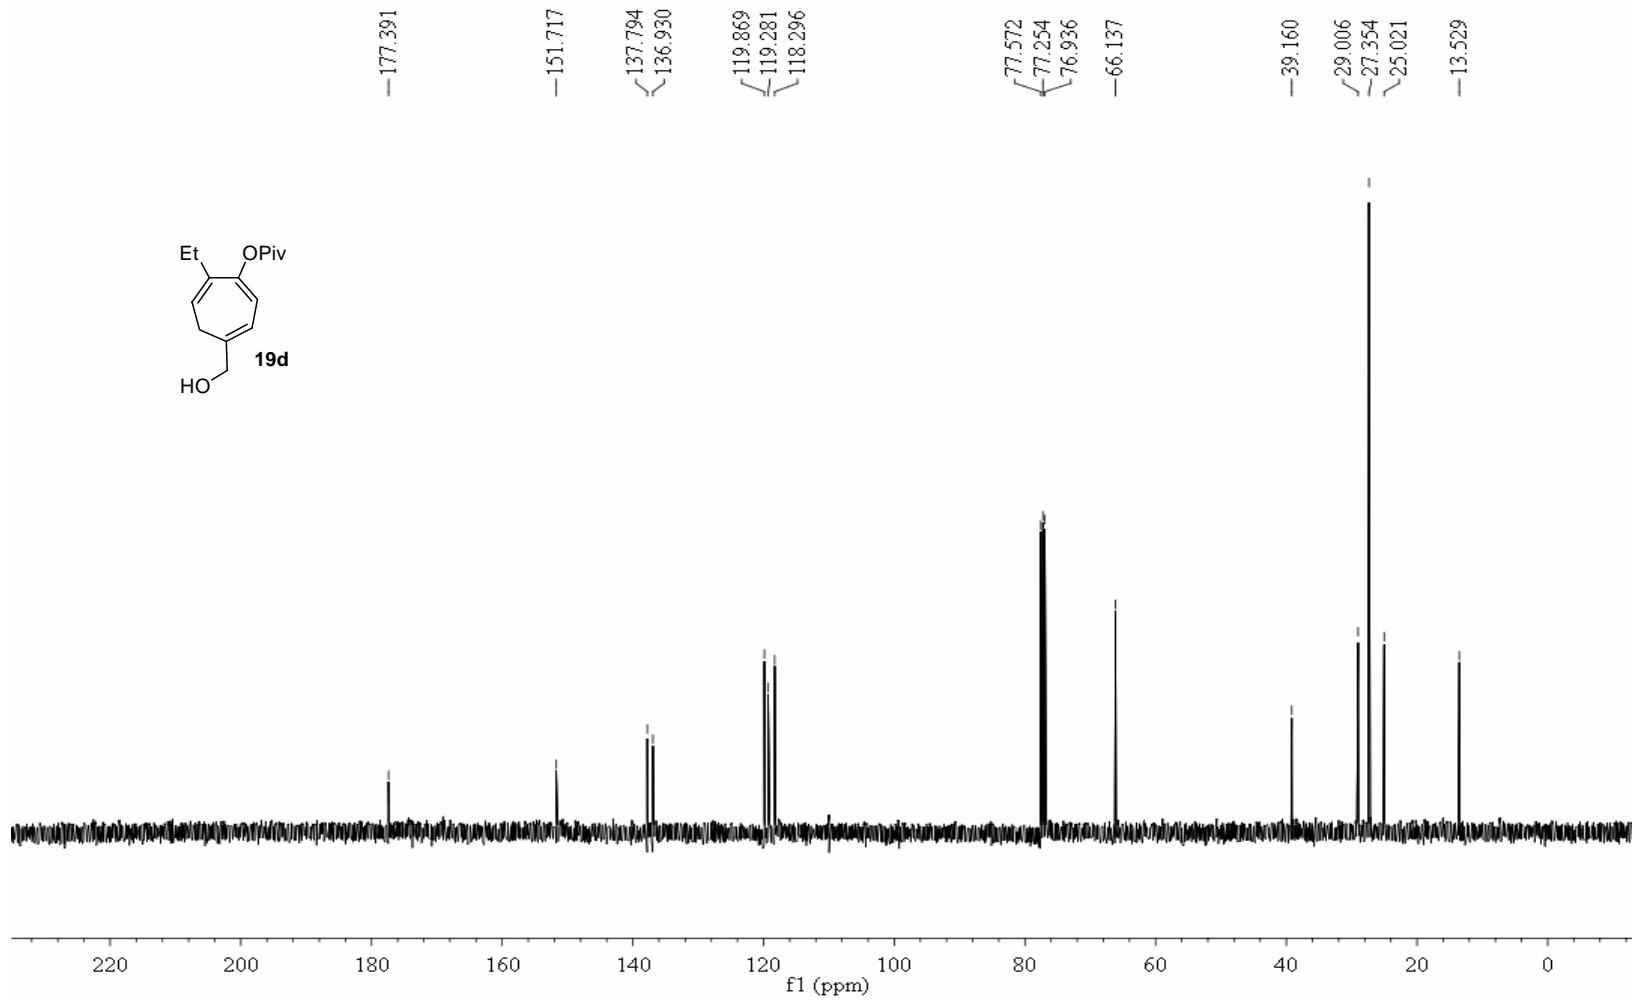

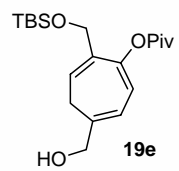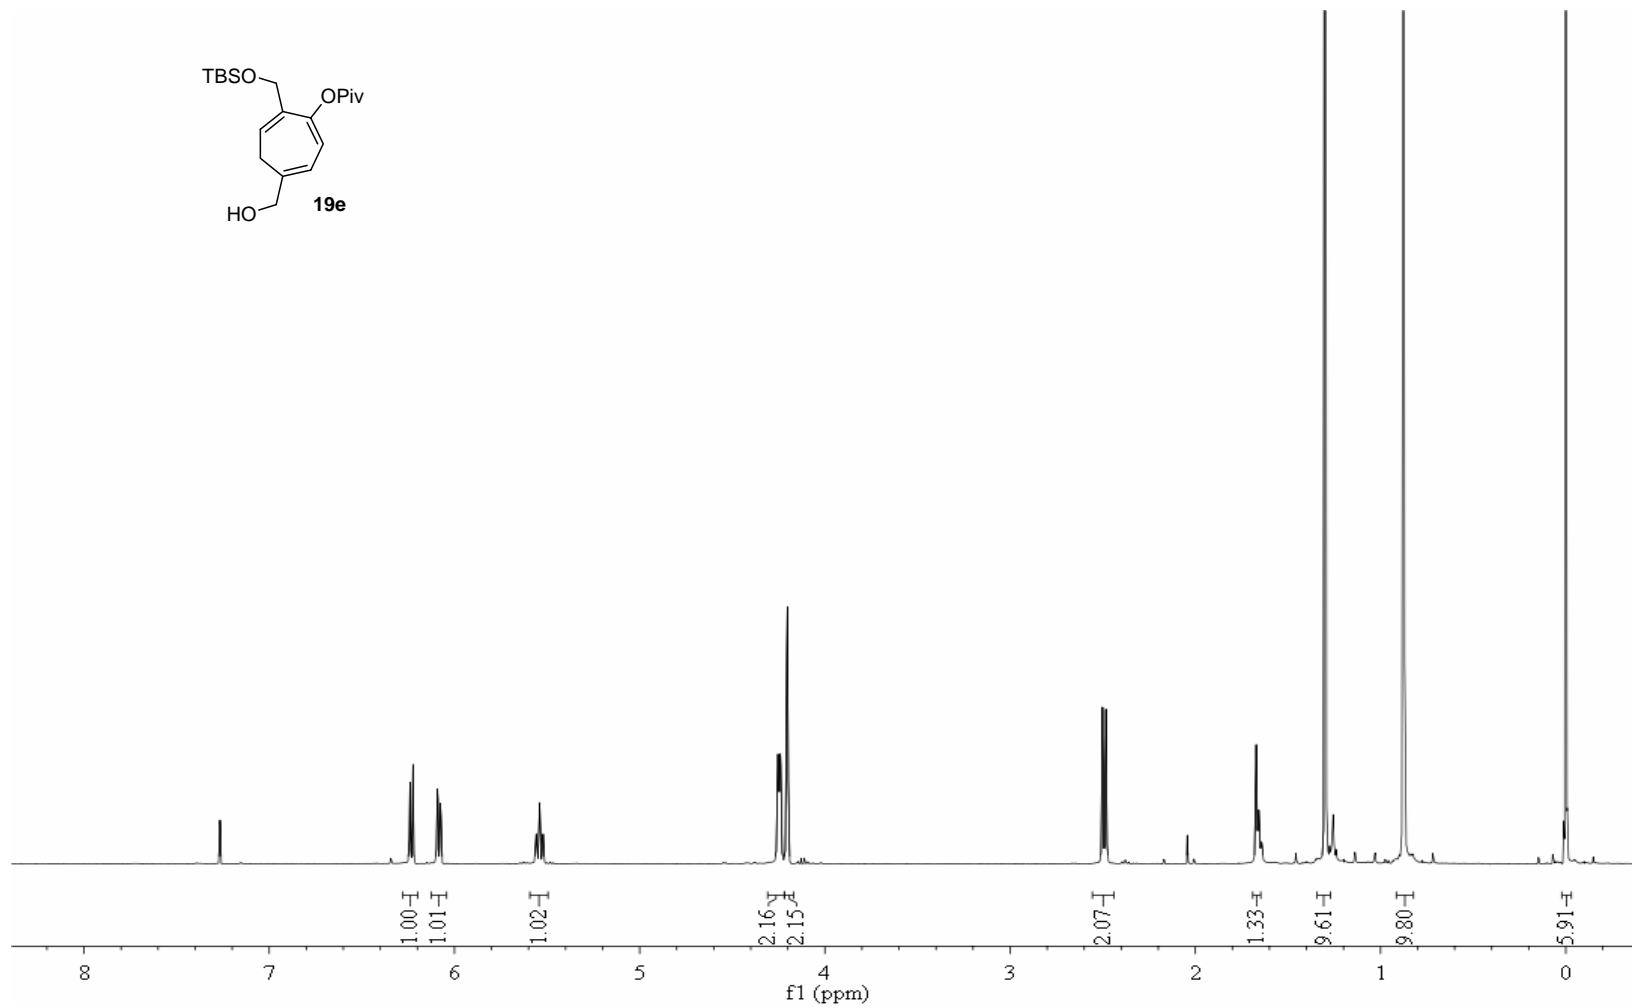

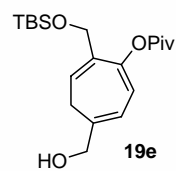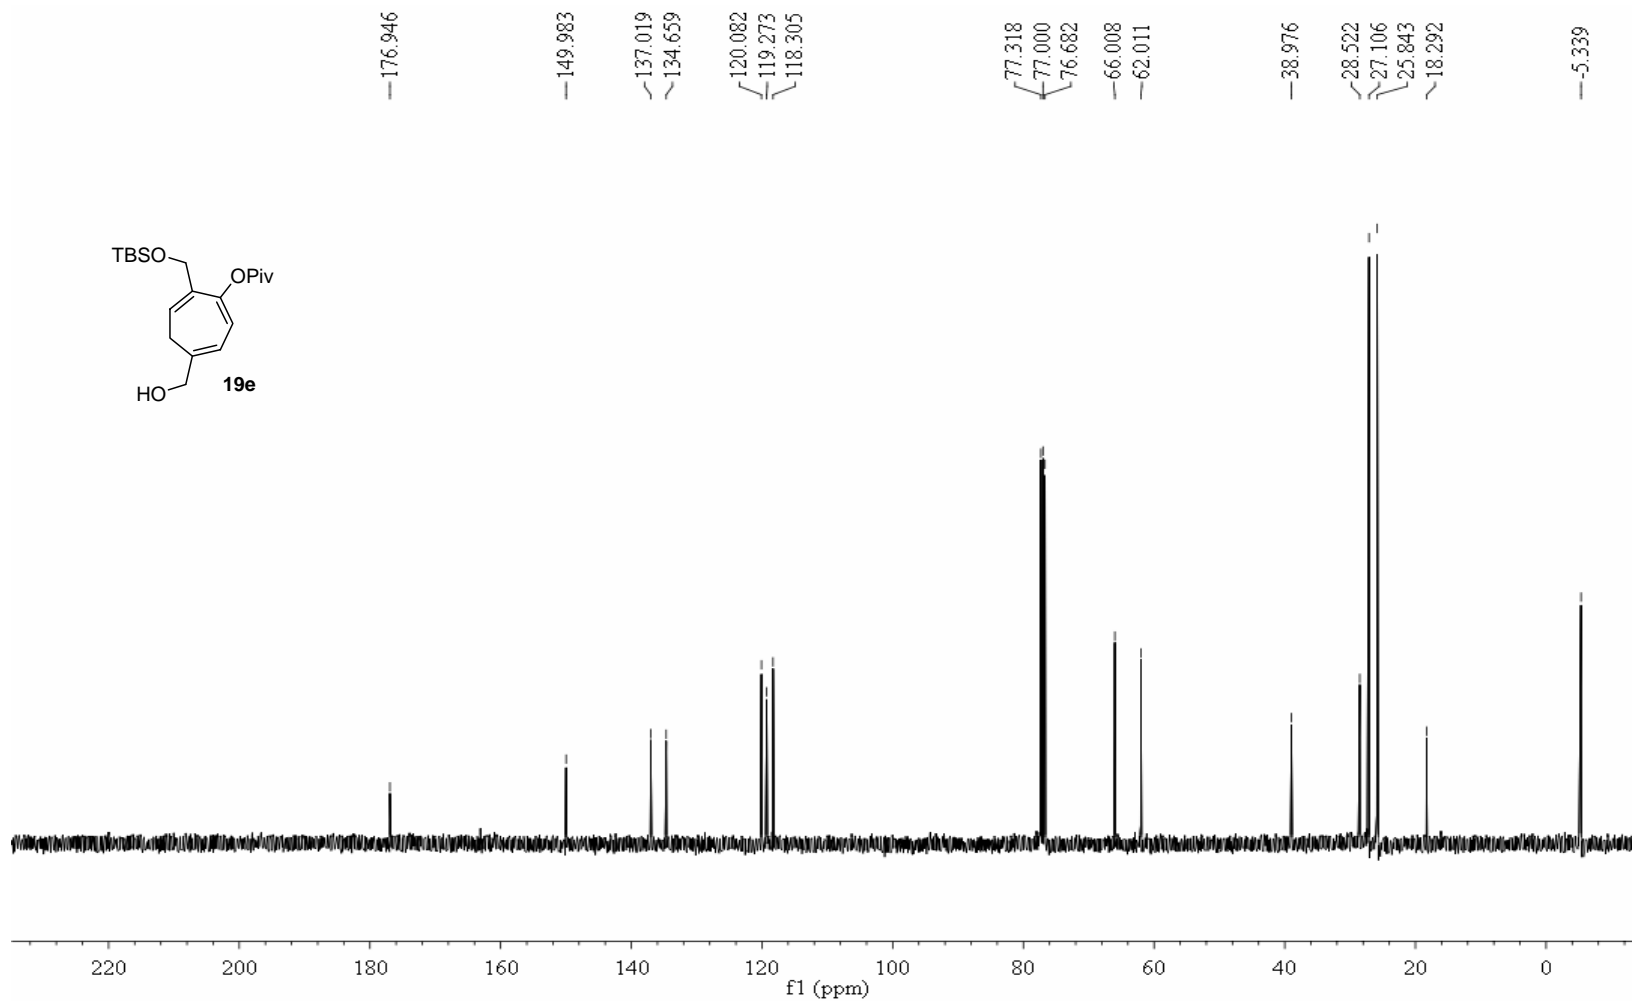

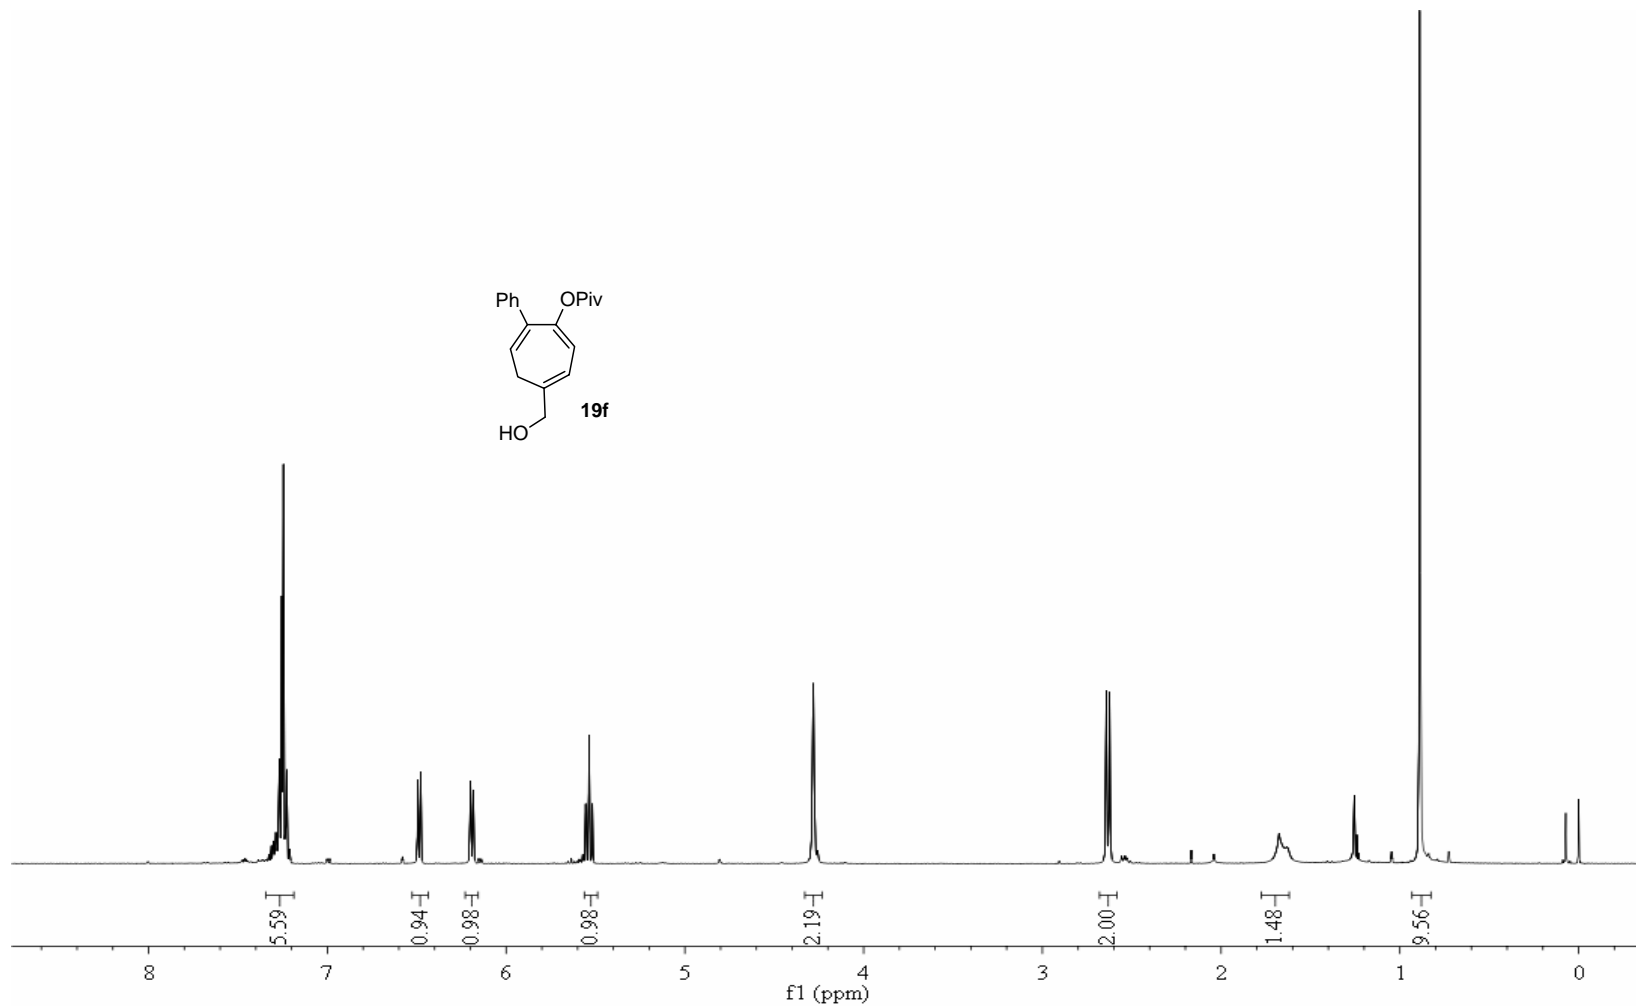

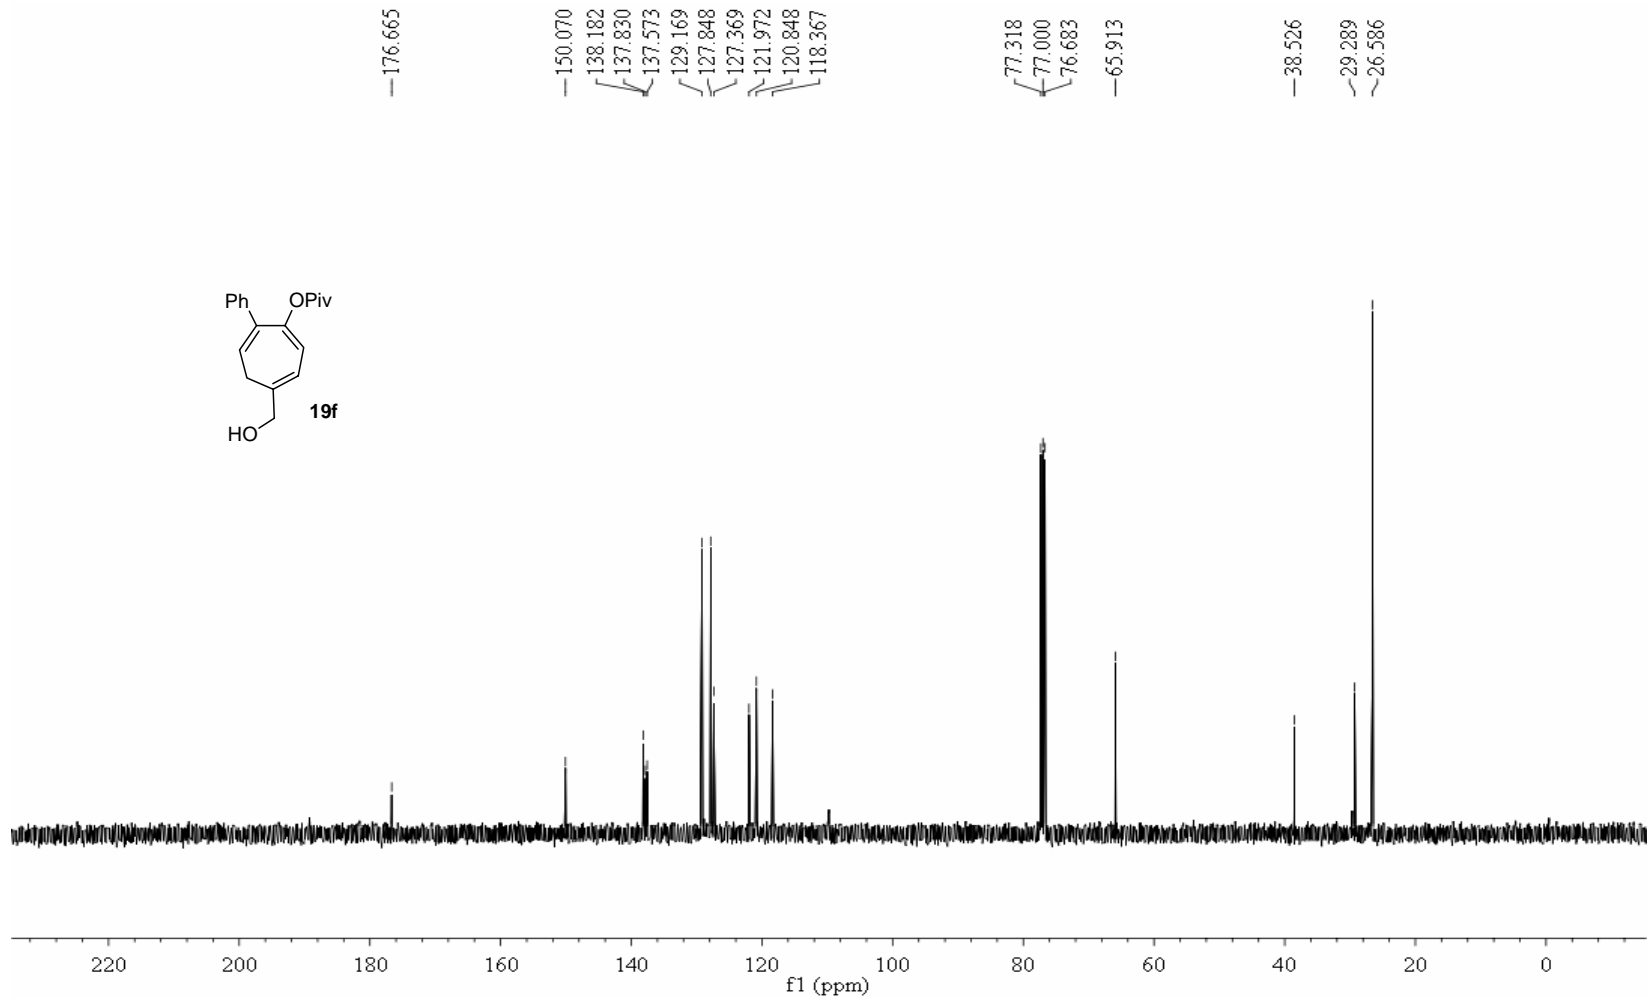



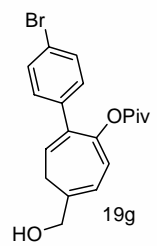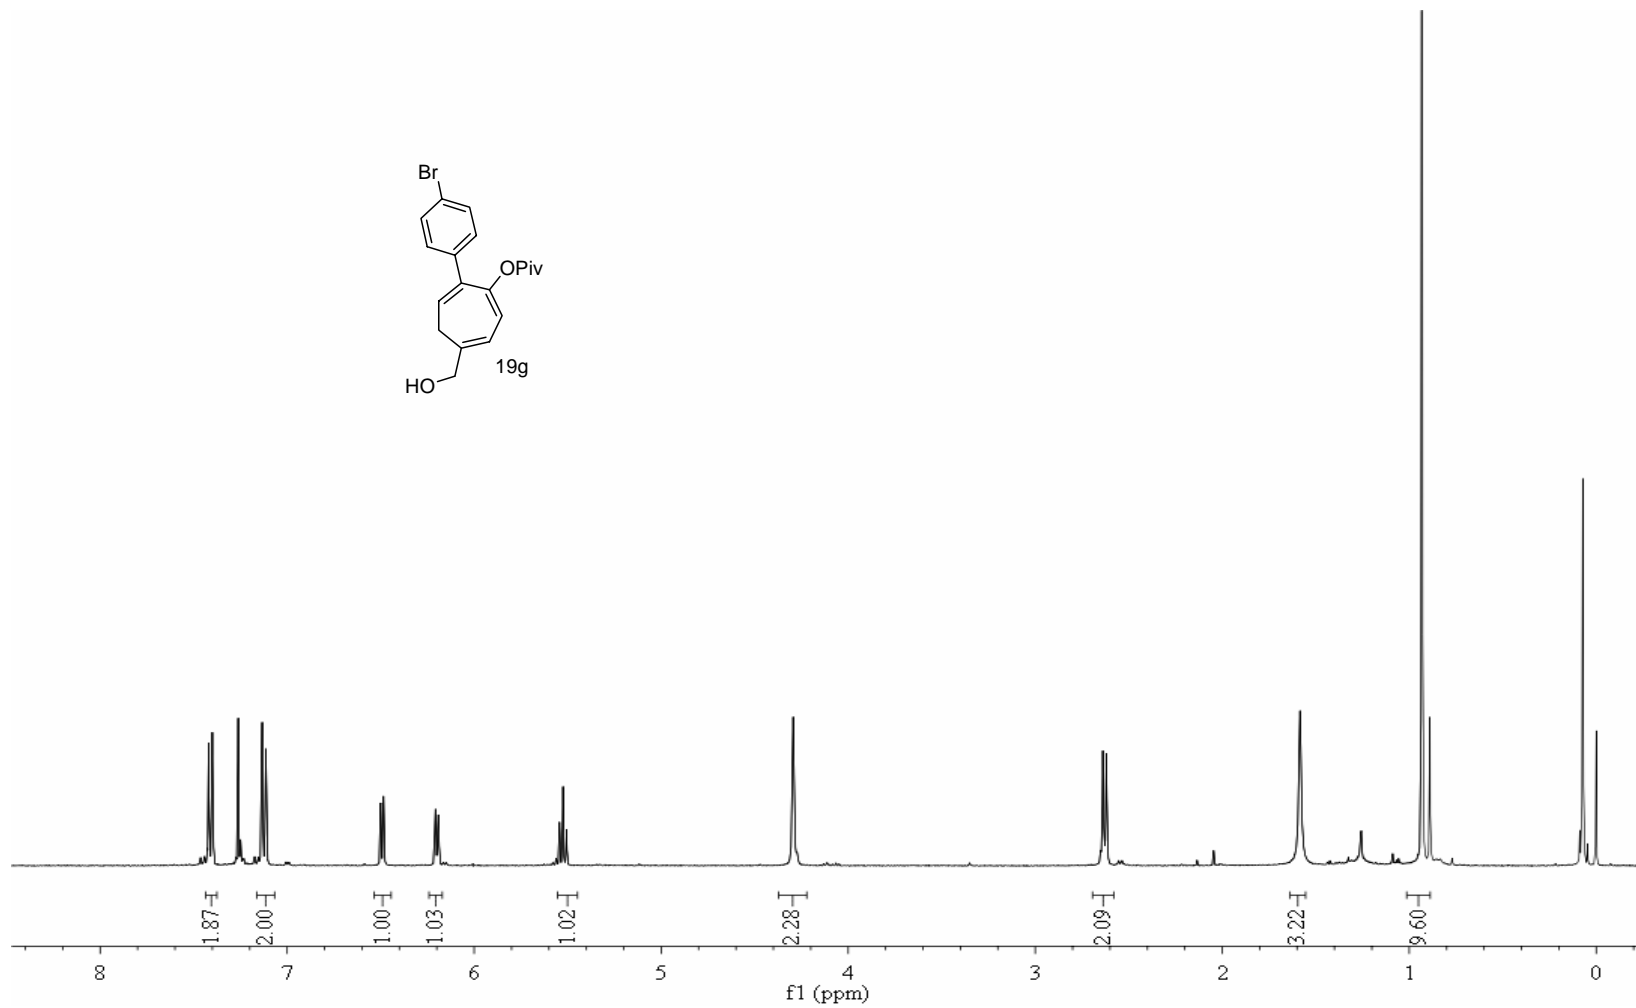

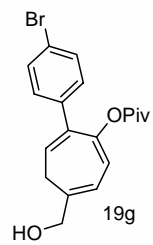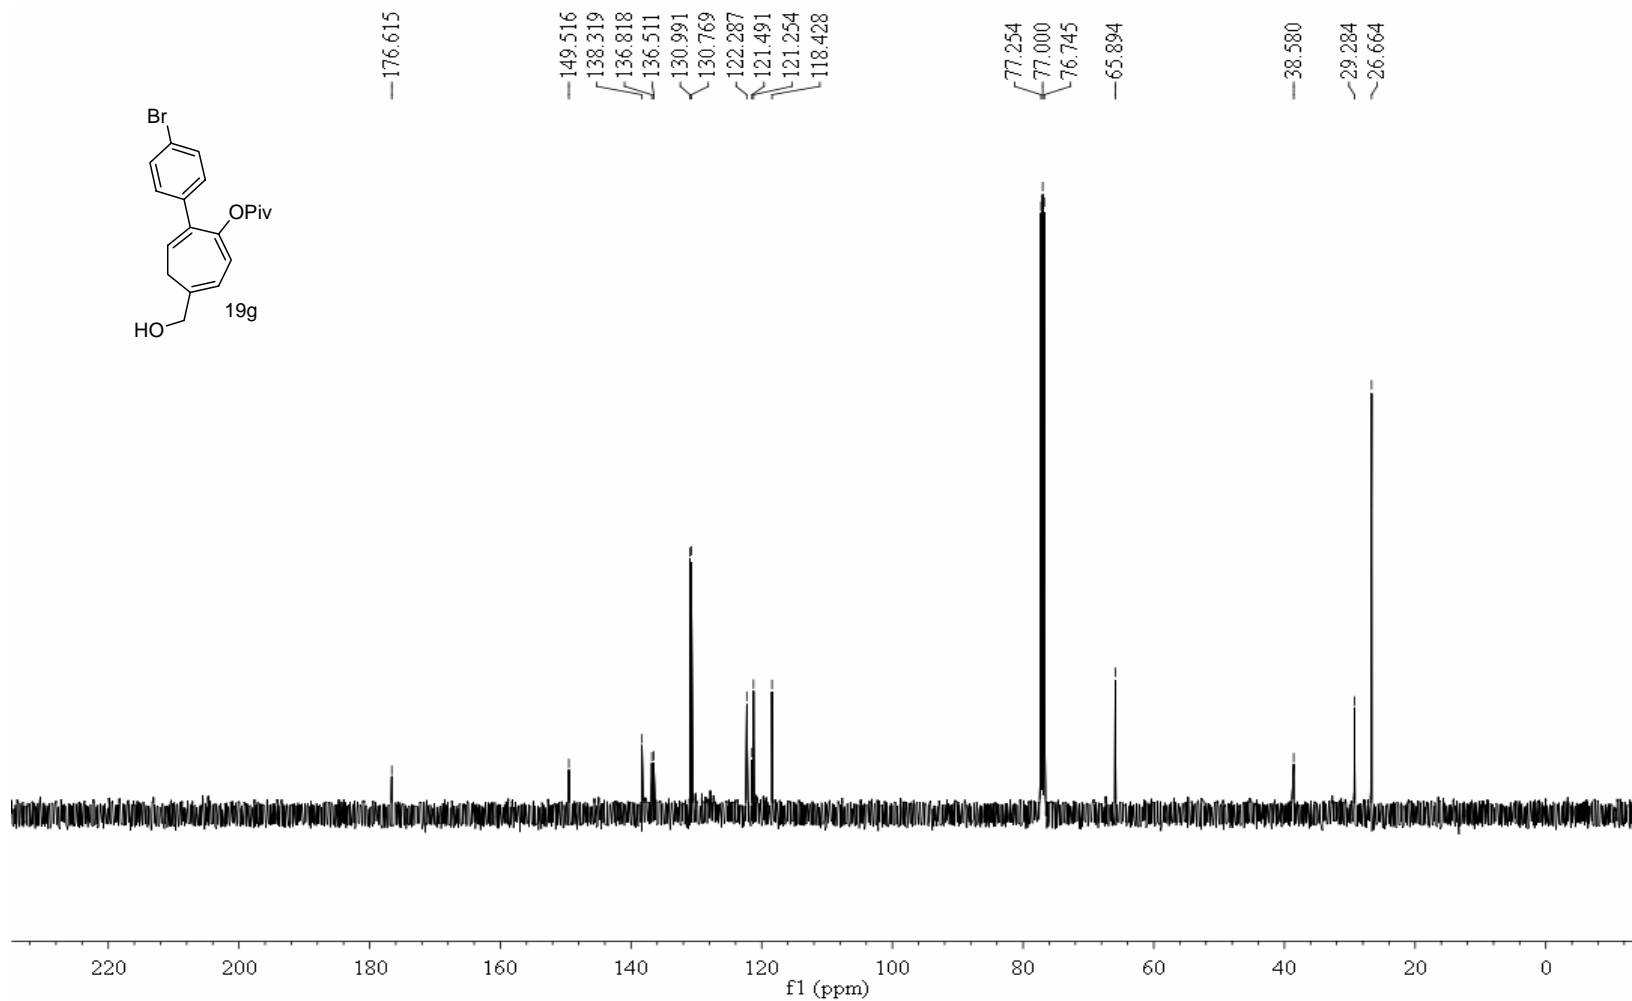

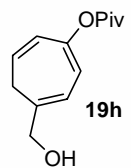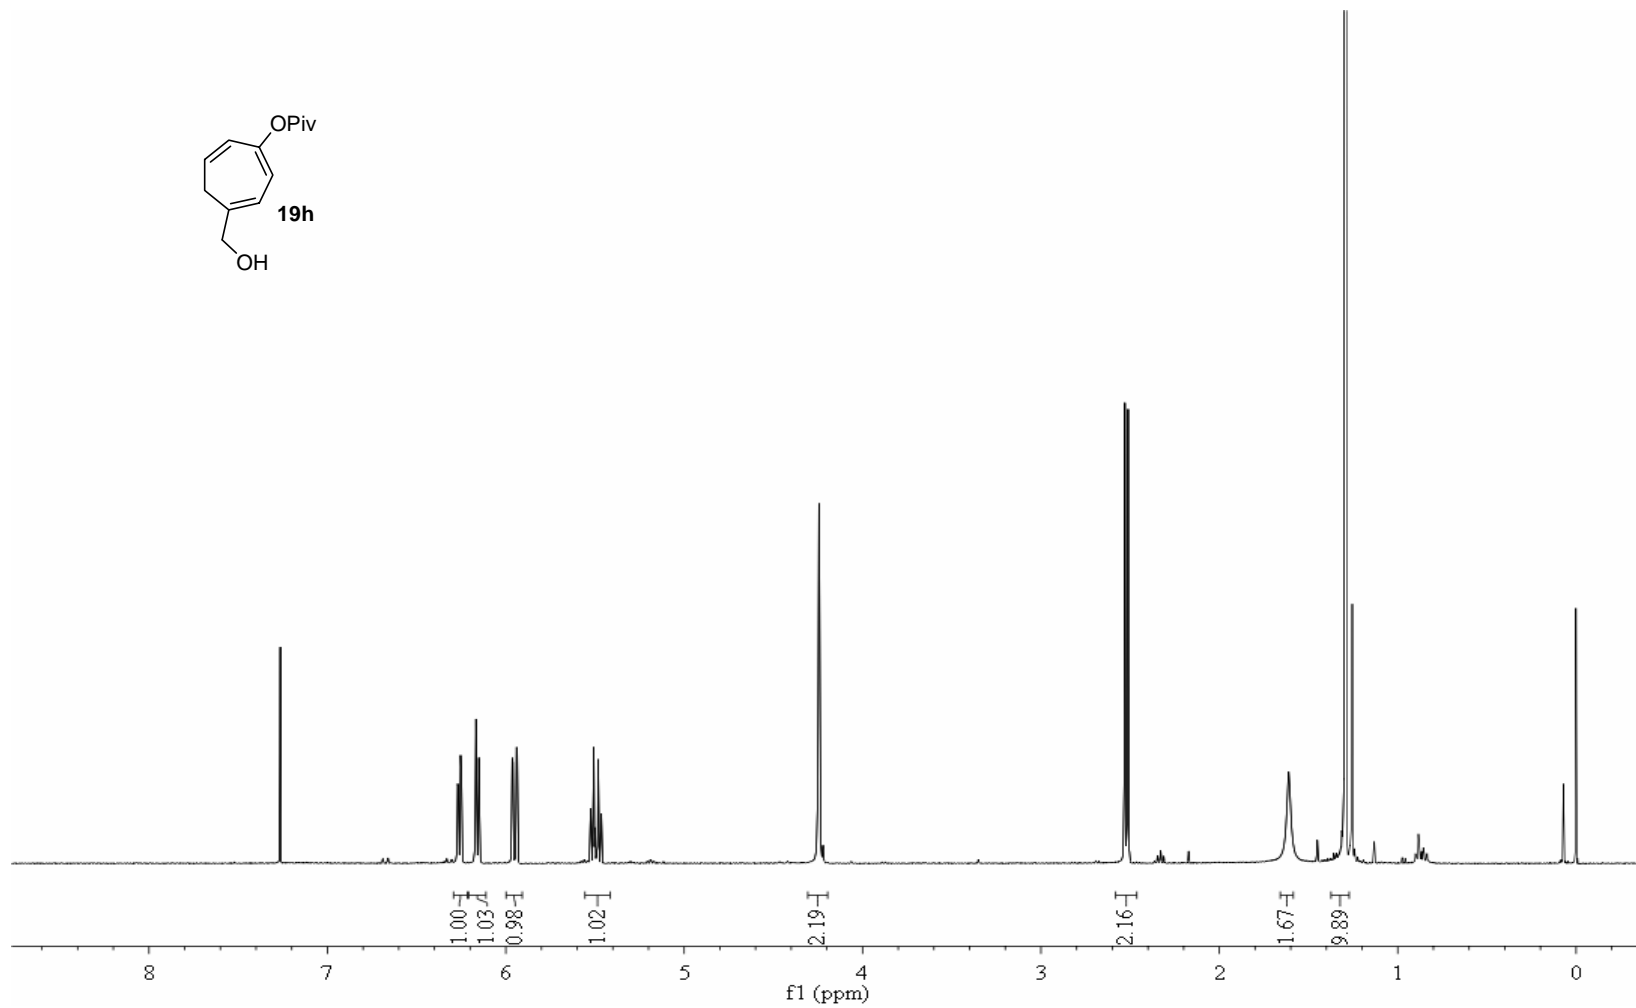

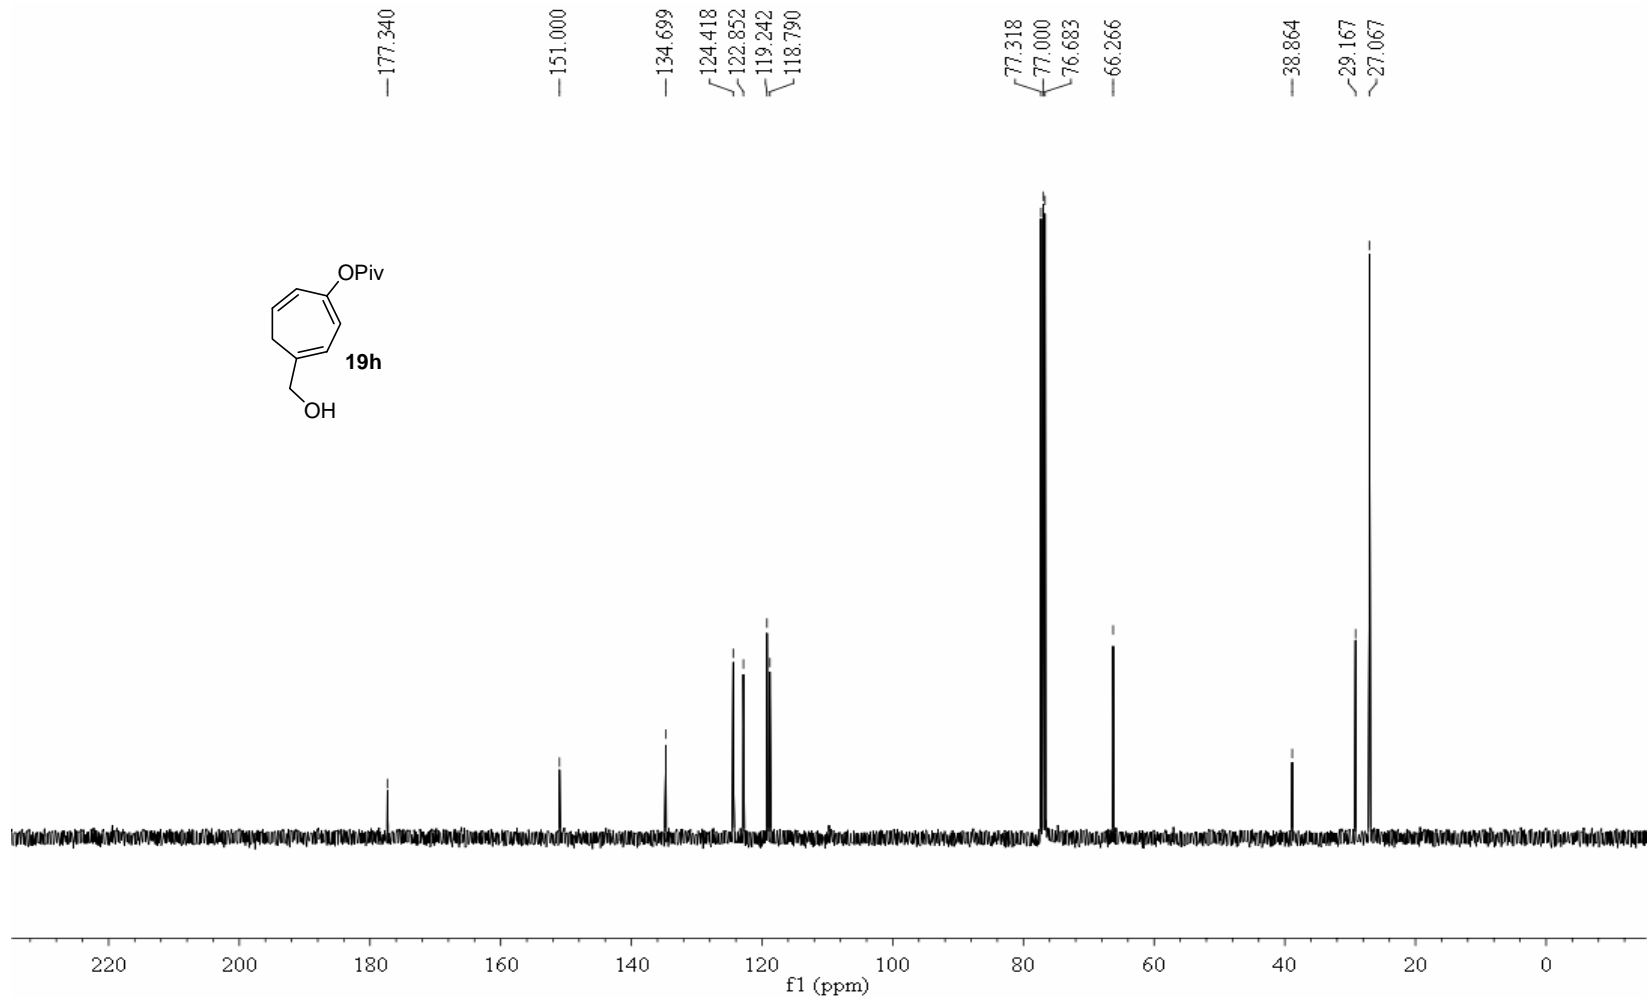

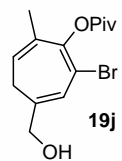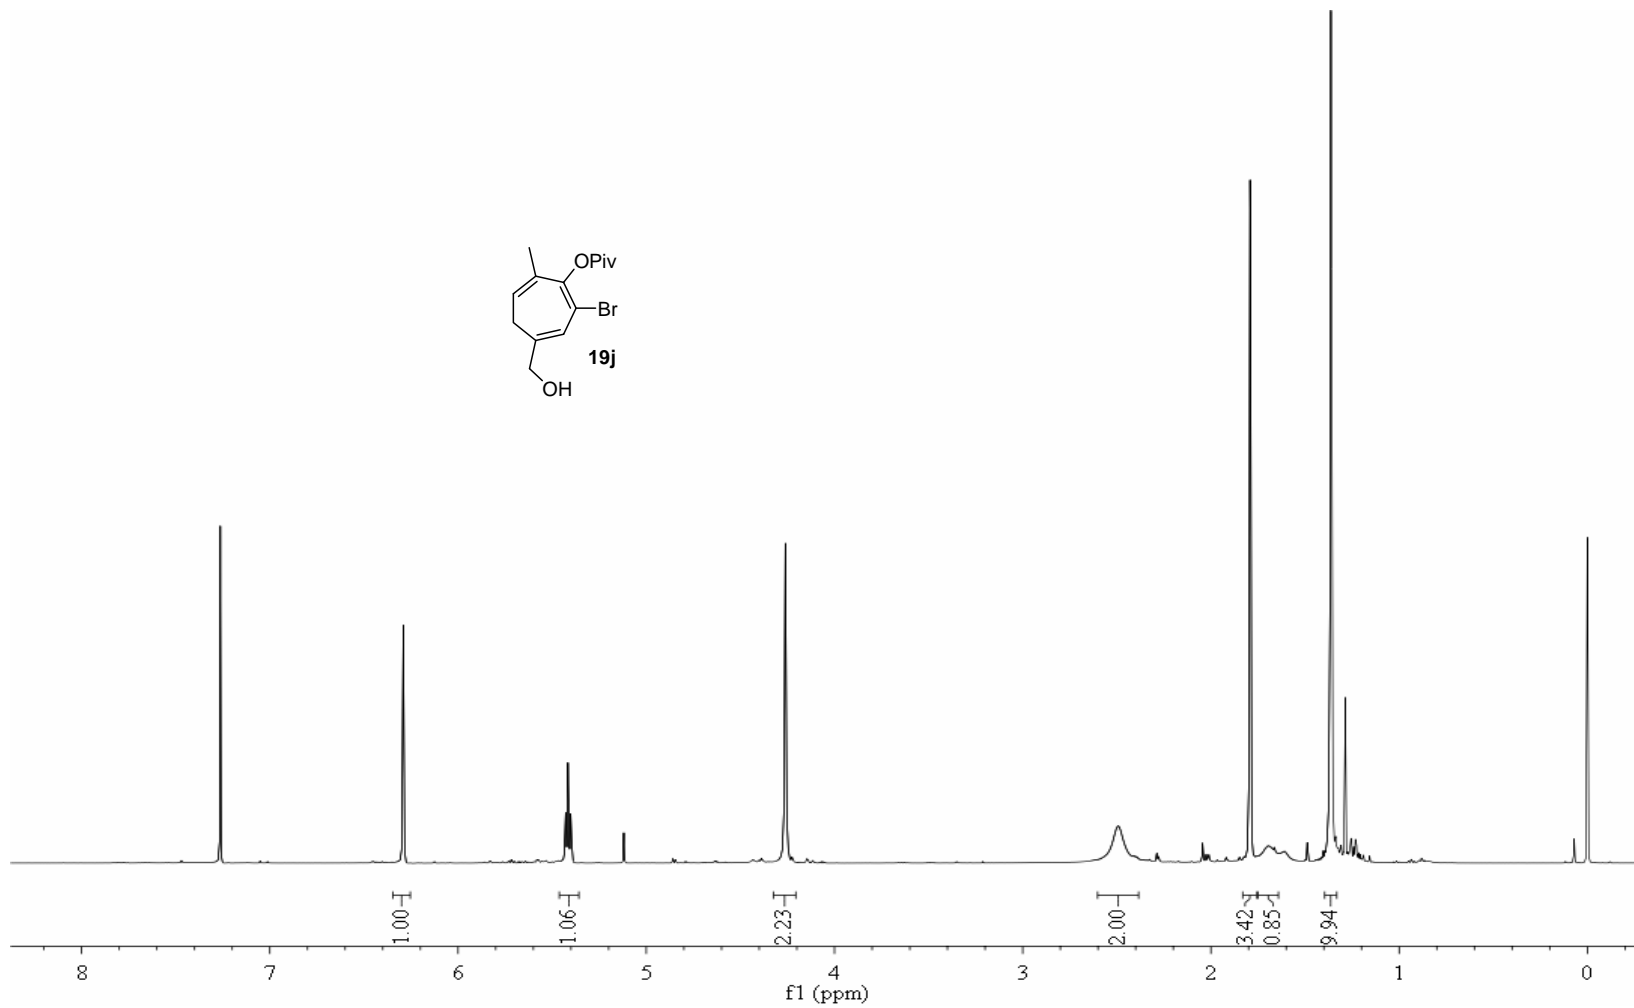

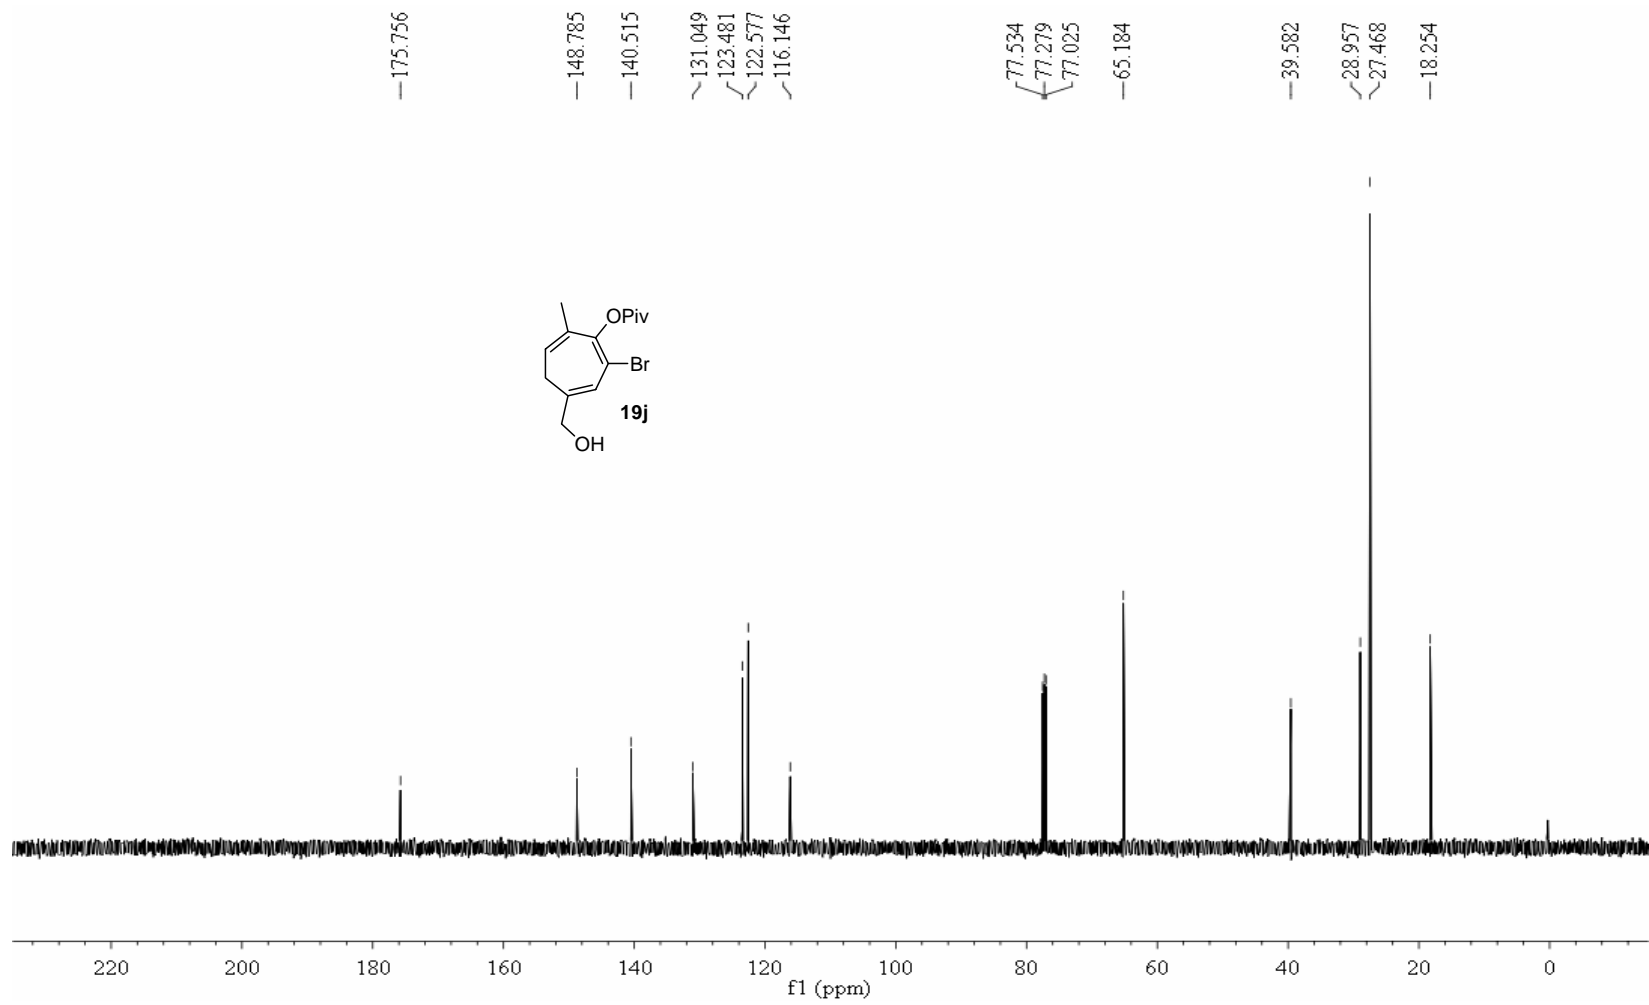

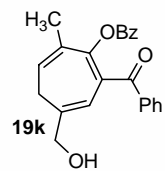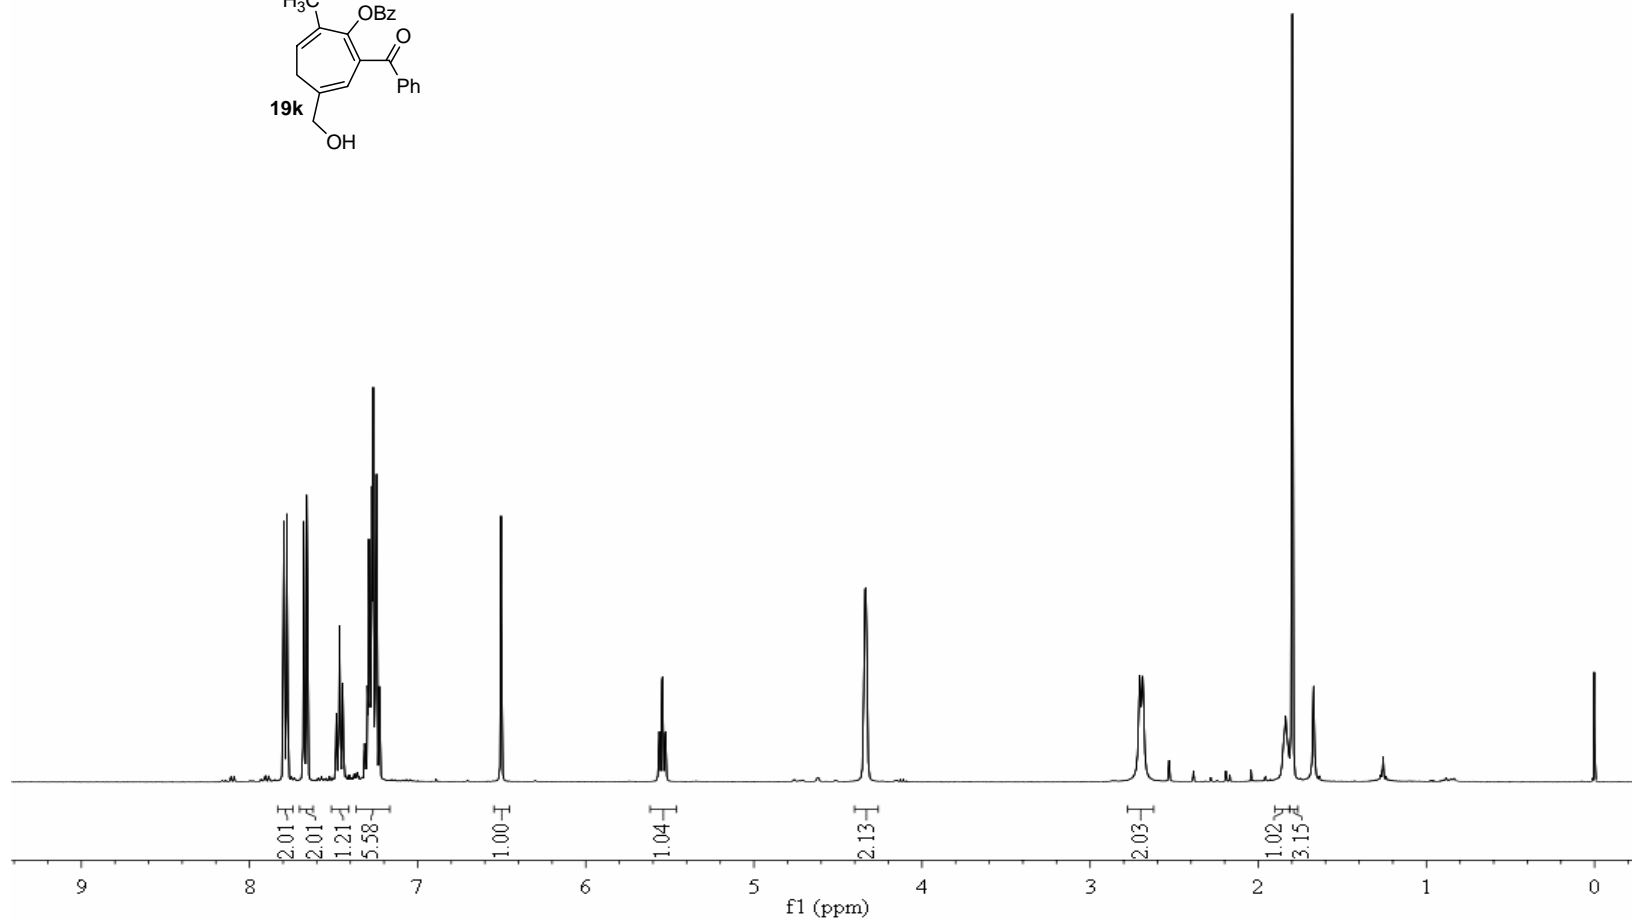

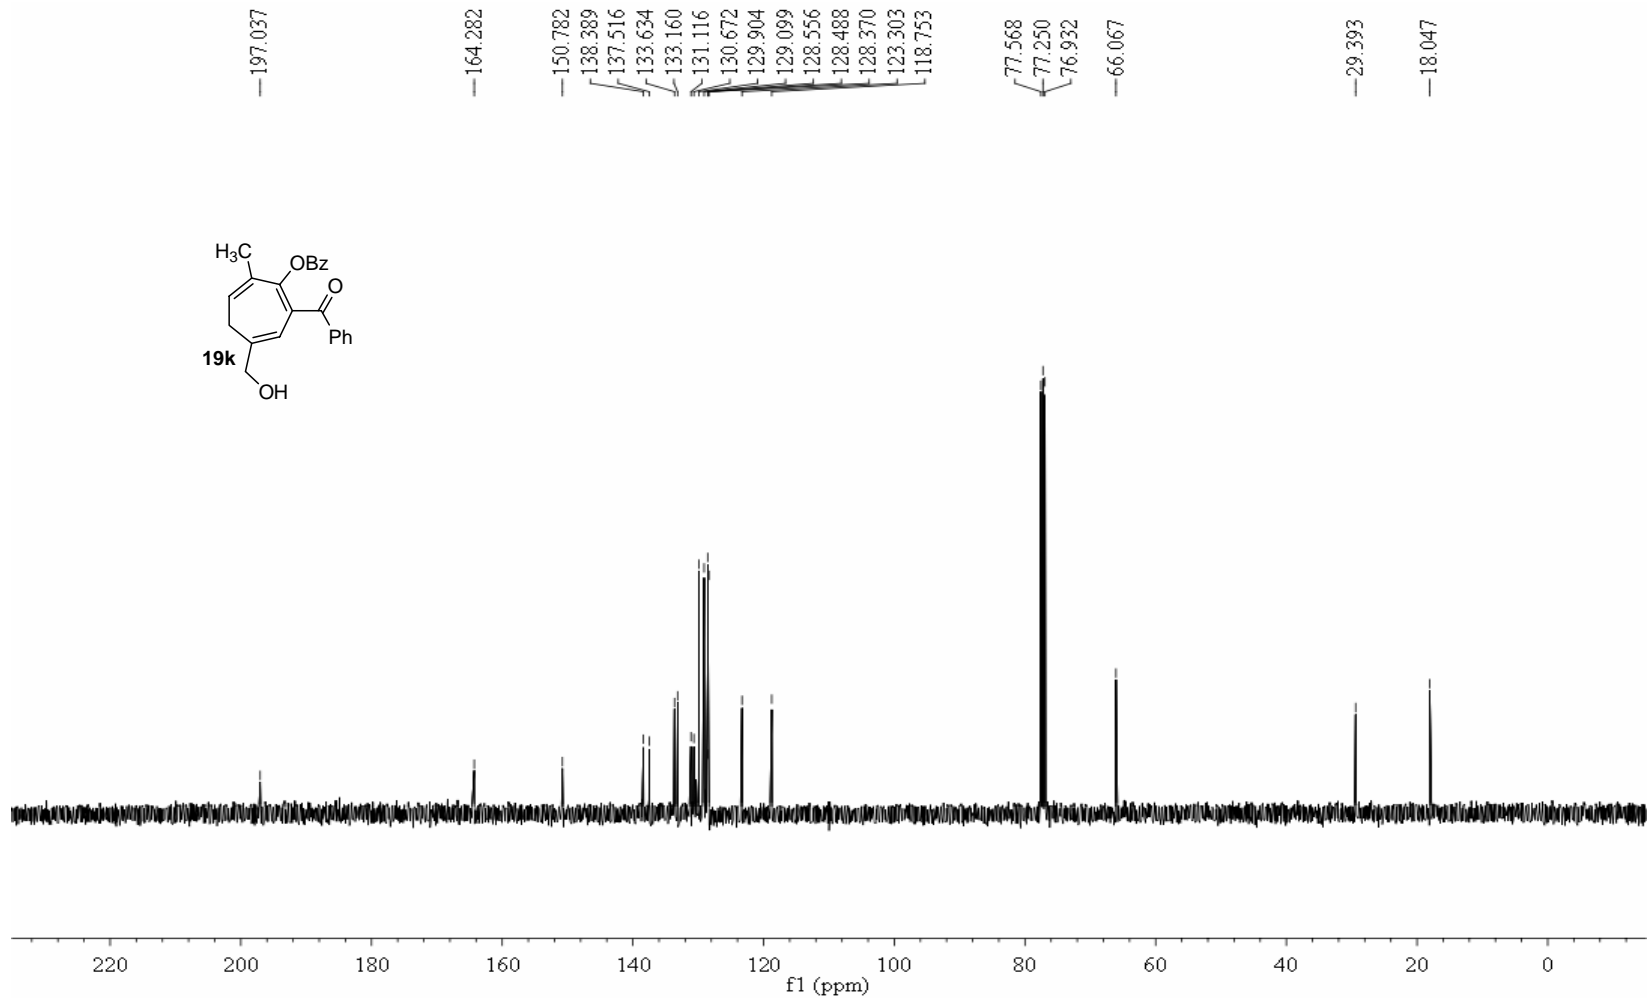



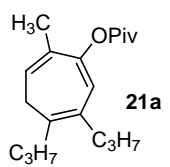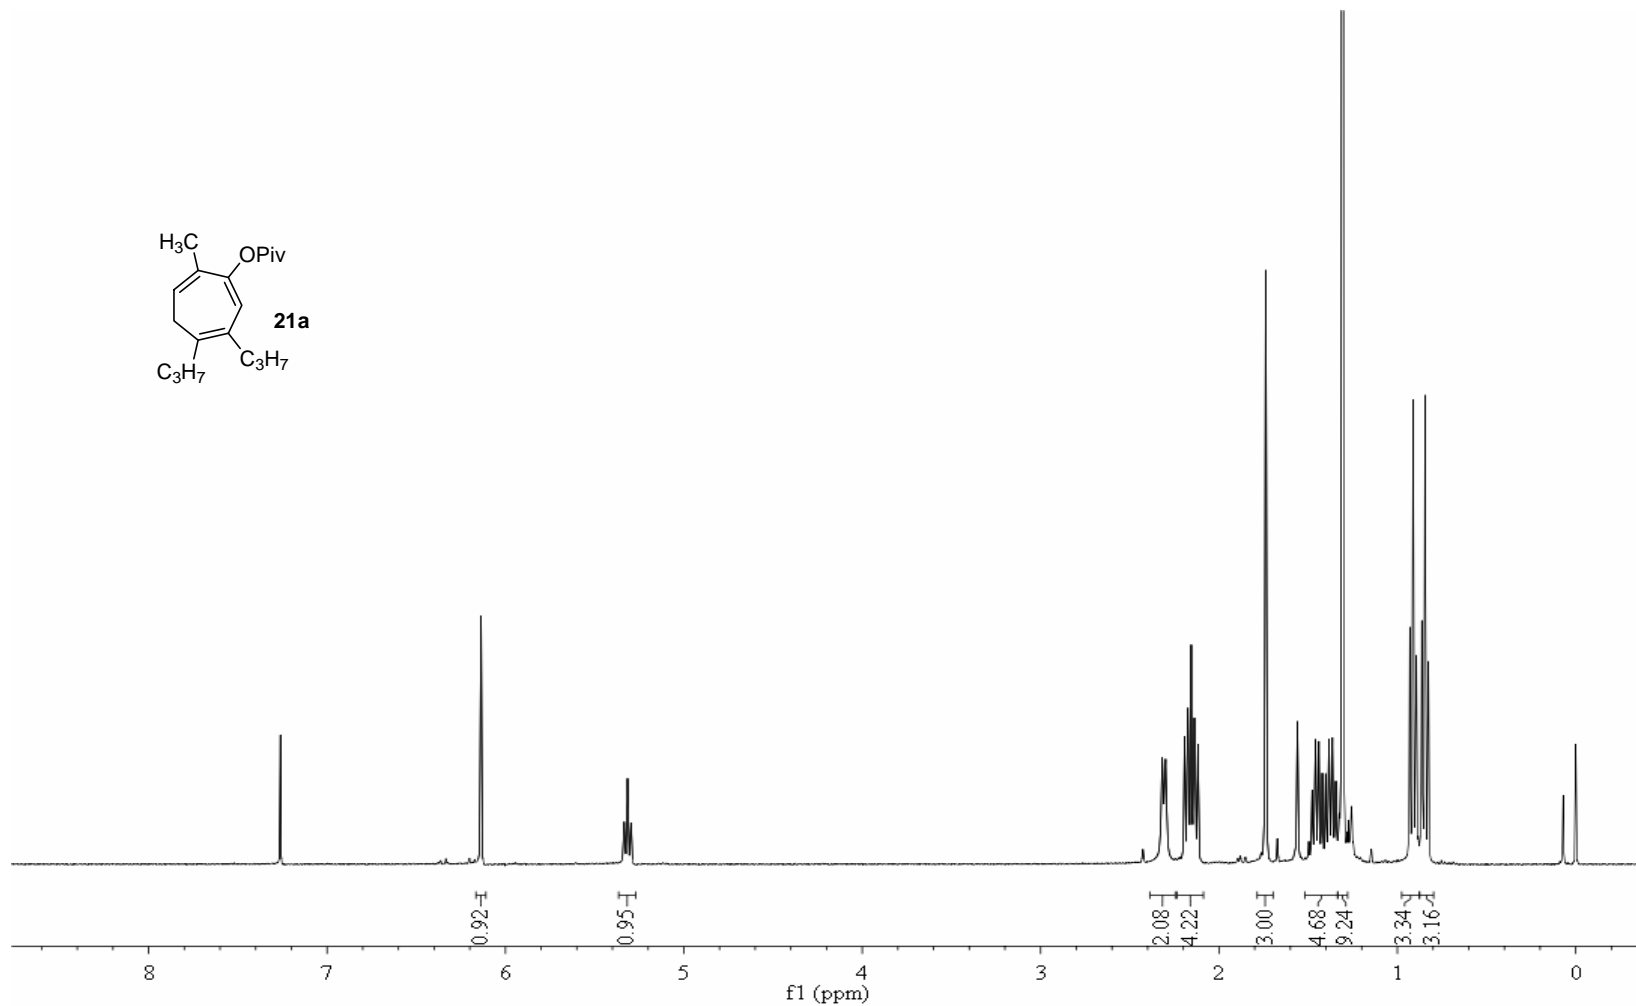

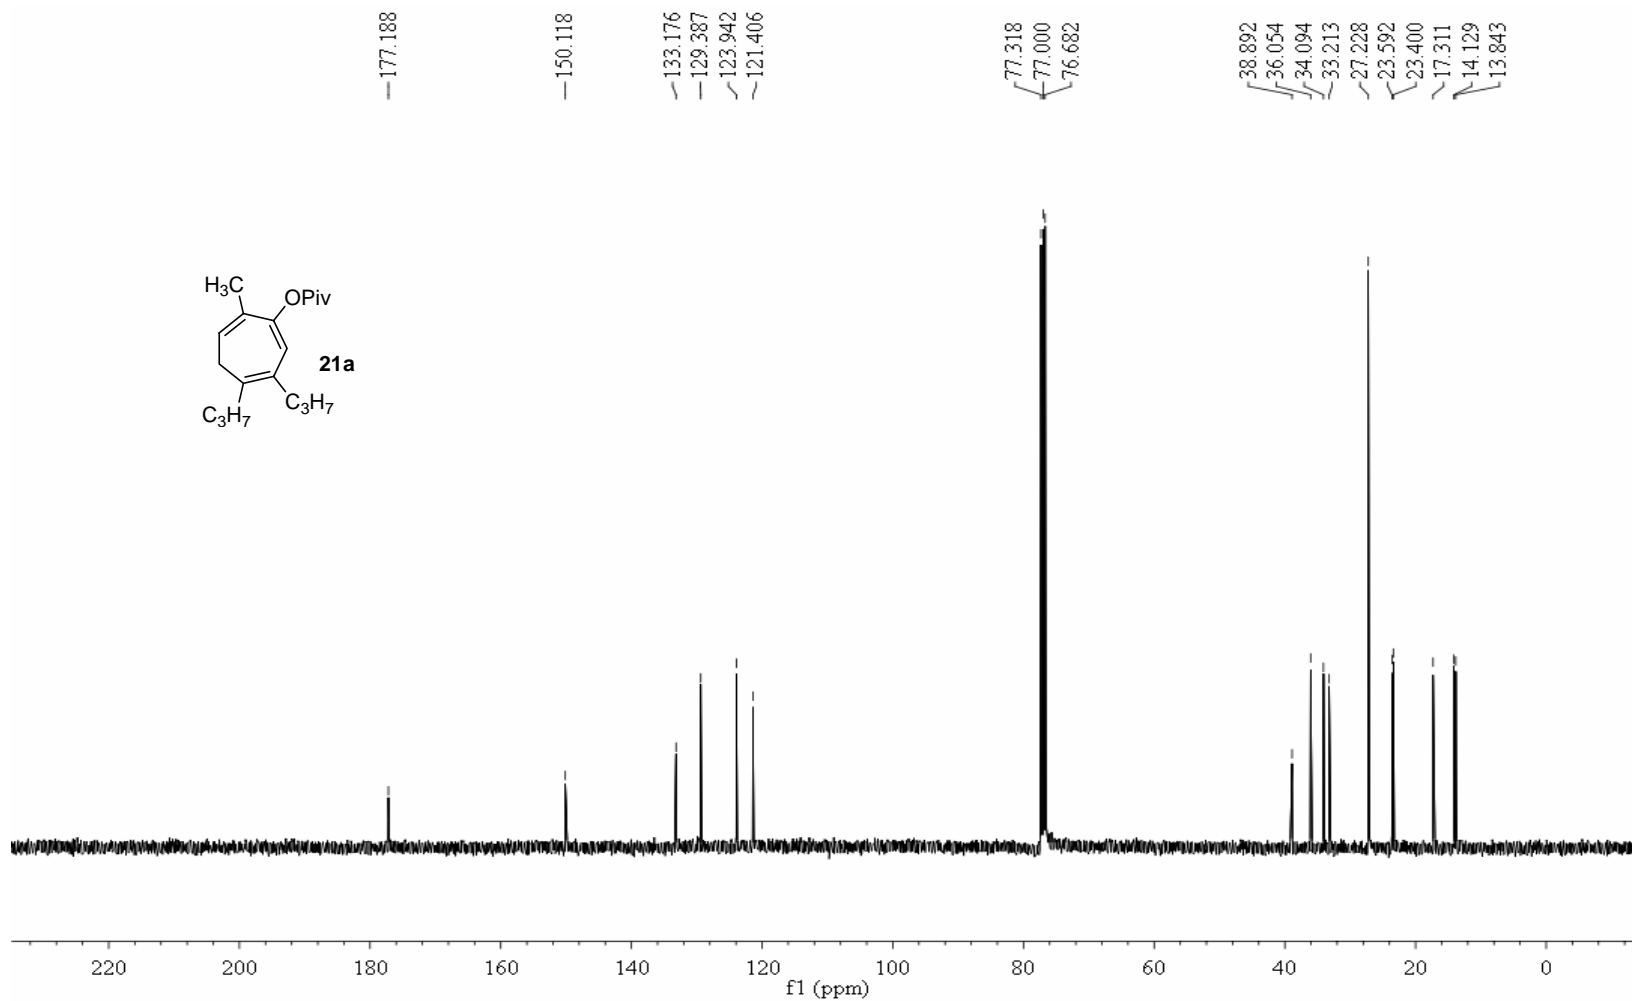

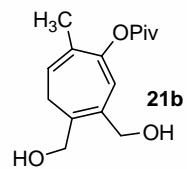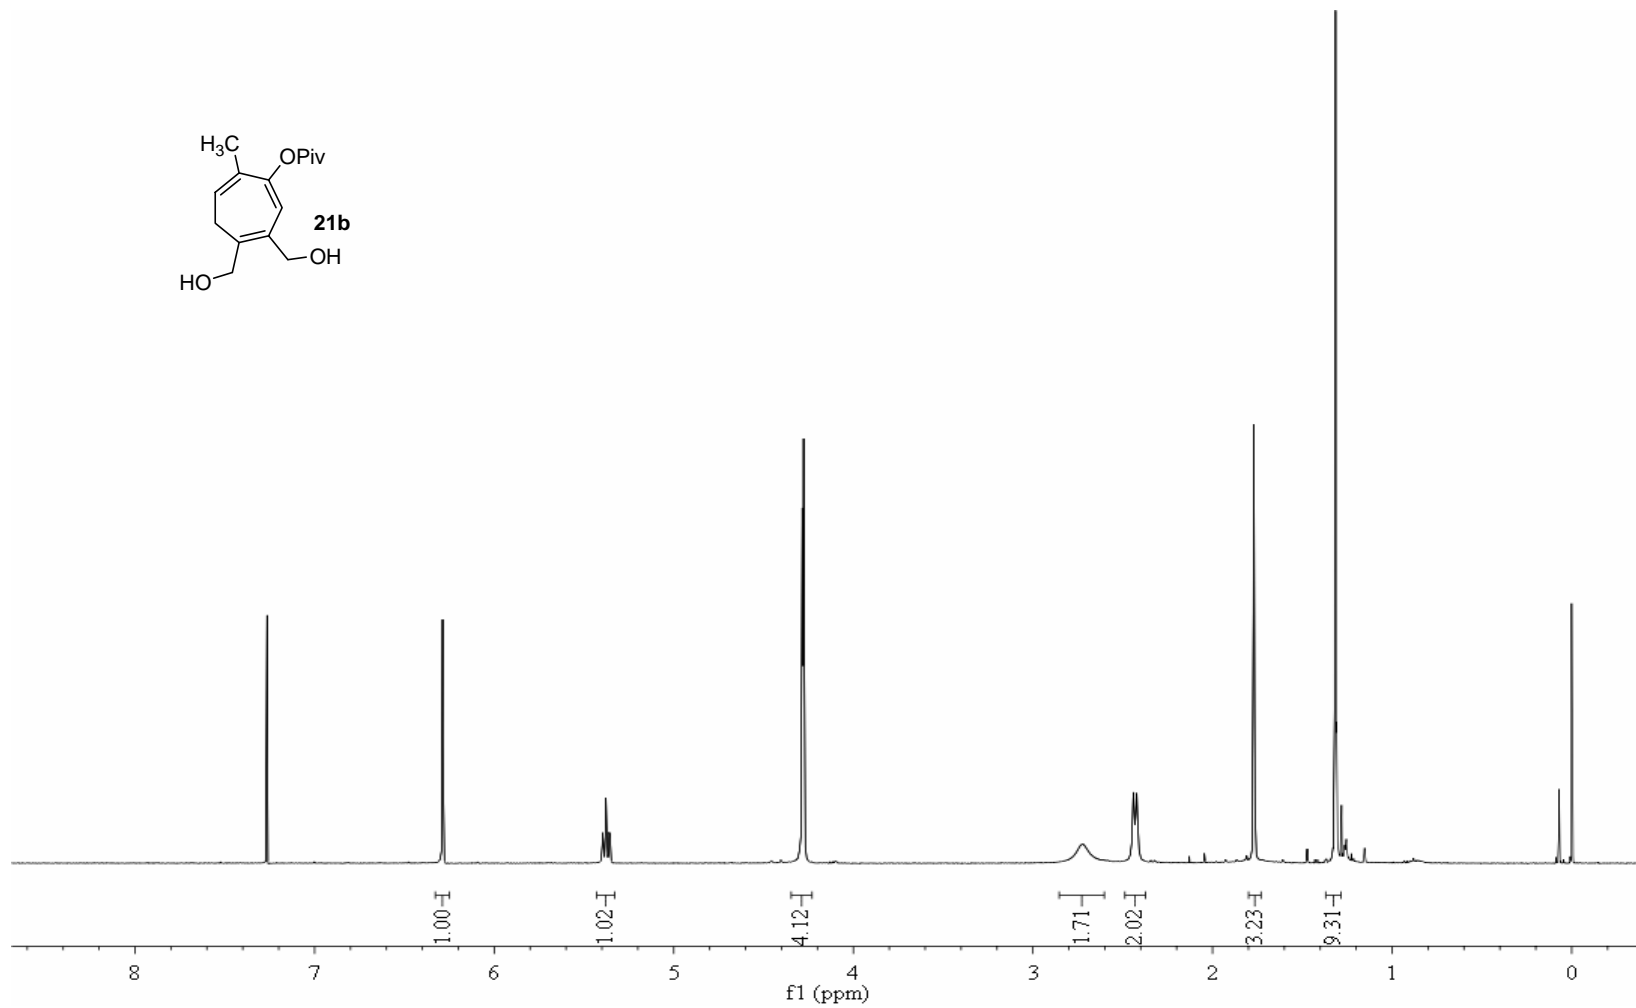

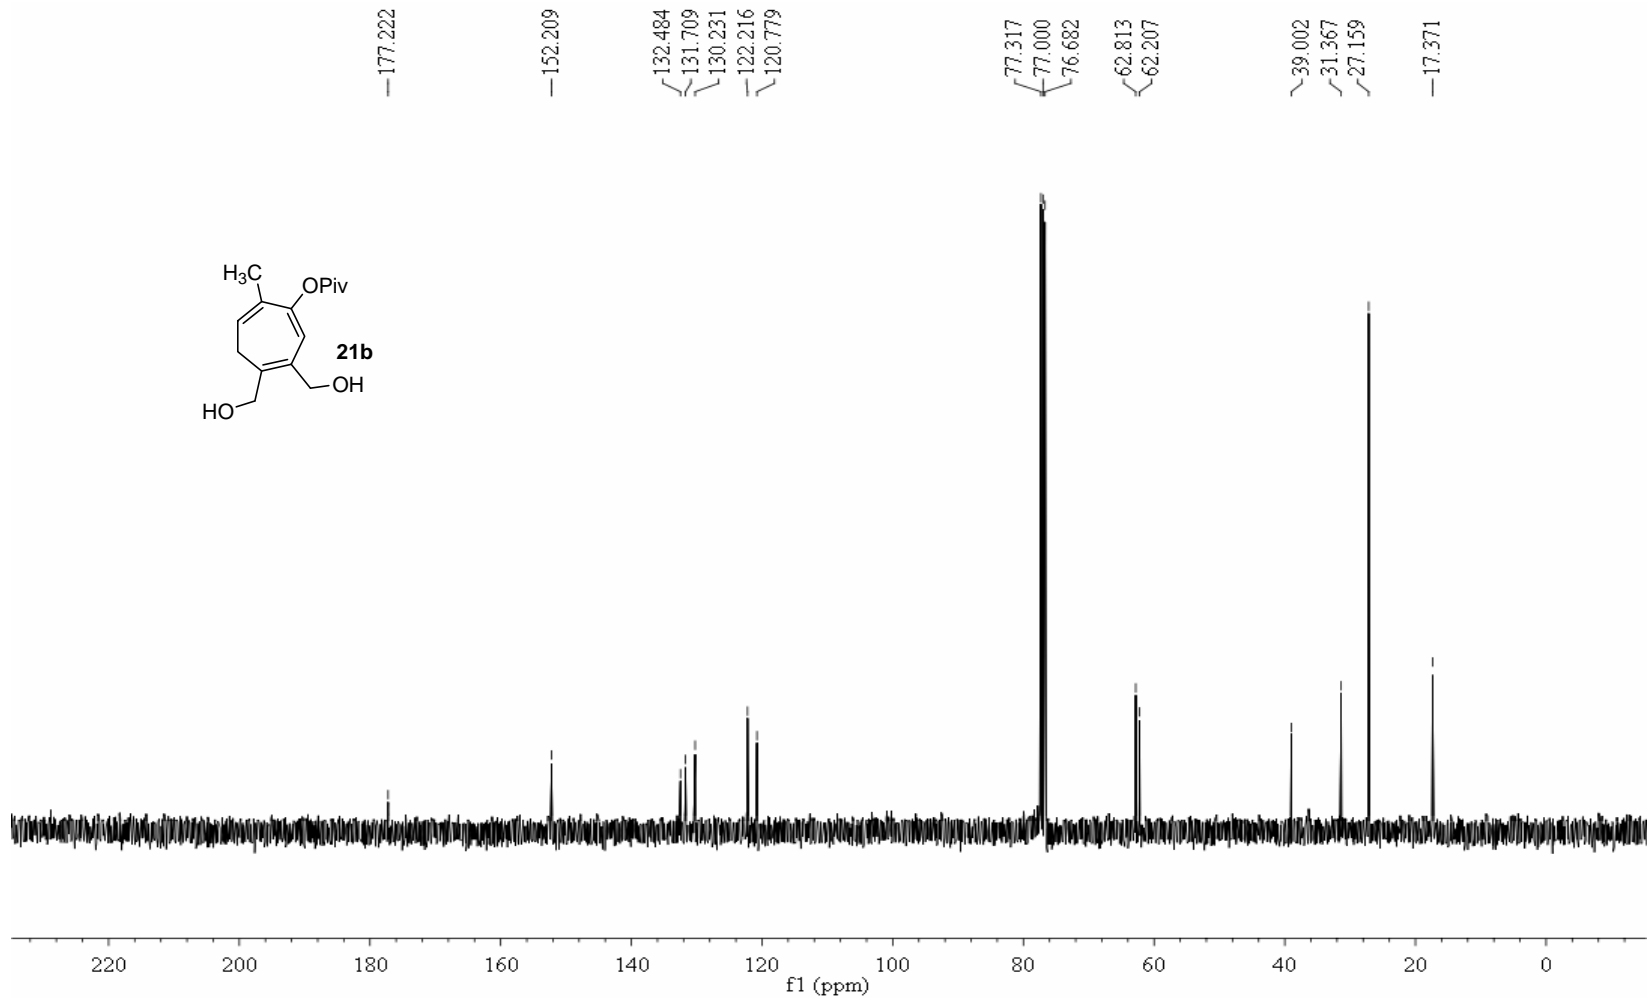

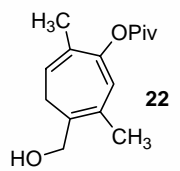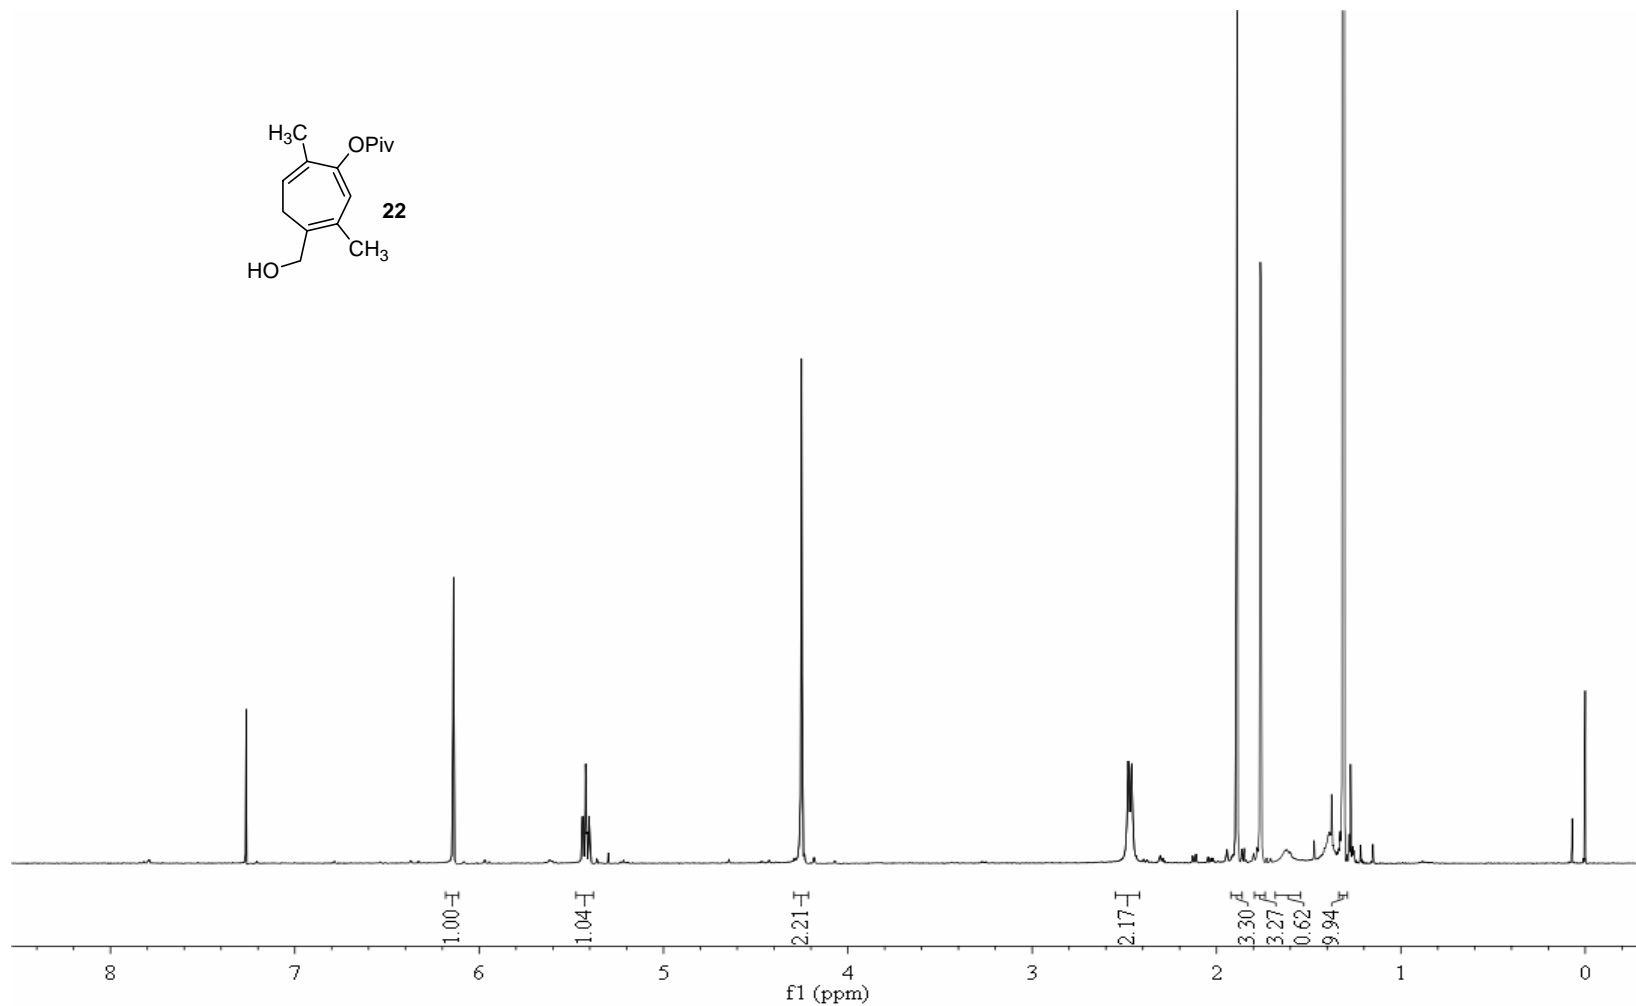

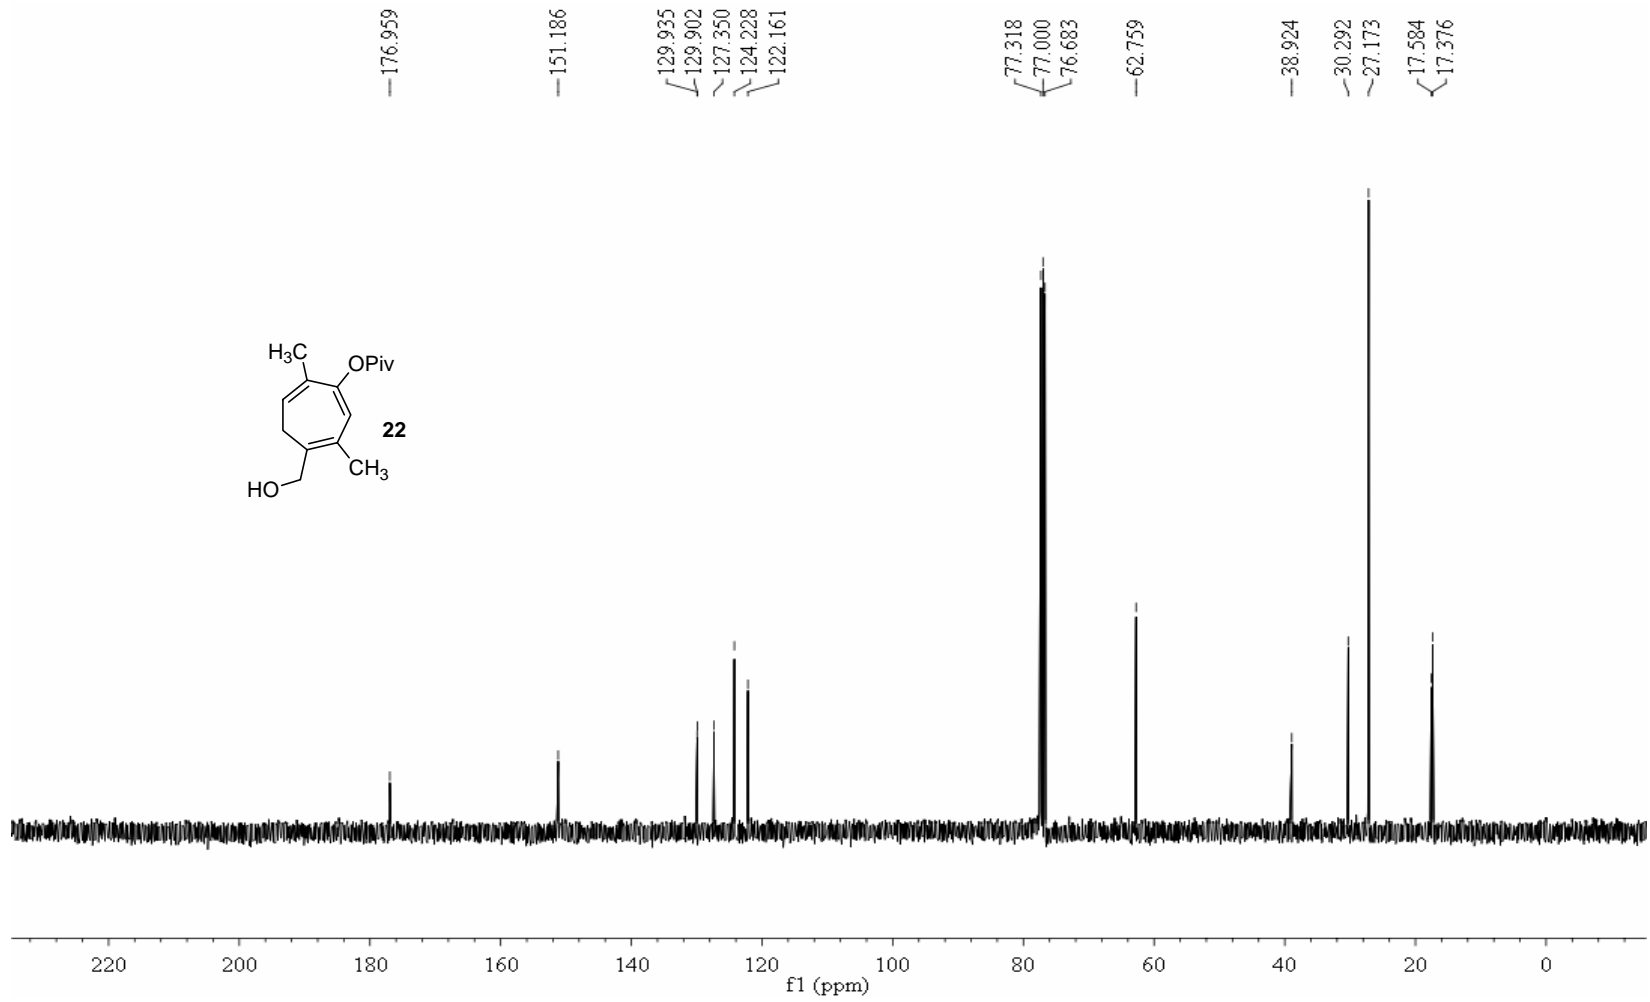

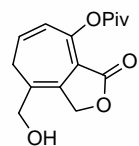

23

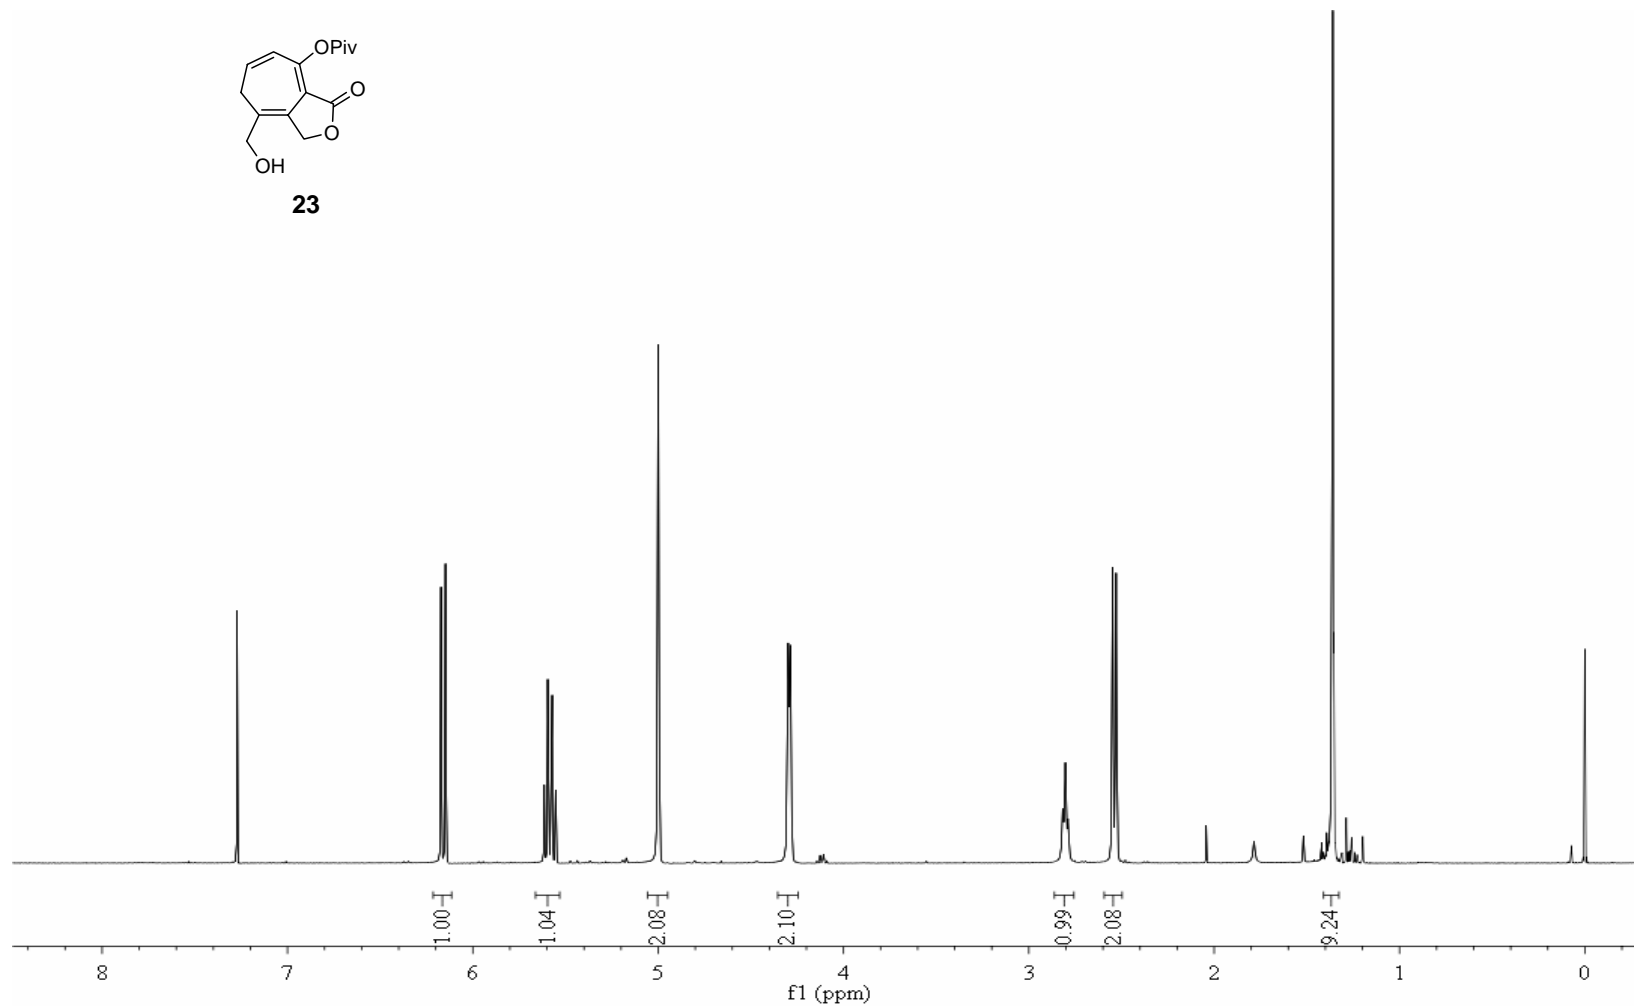

S191

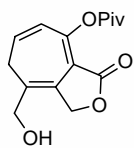

**23**

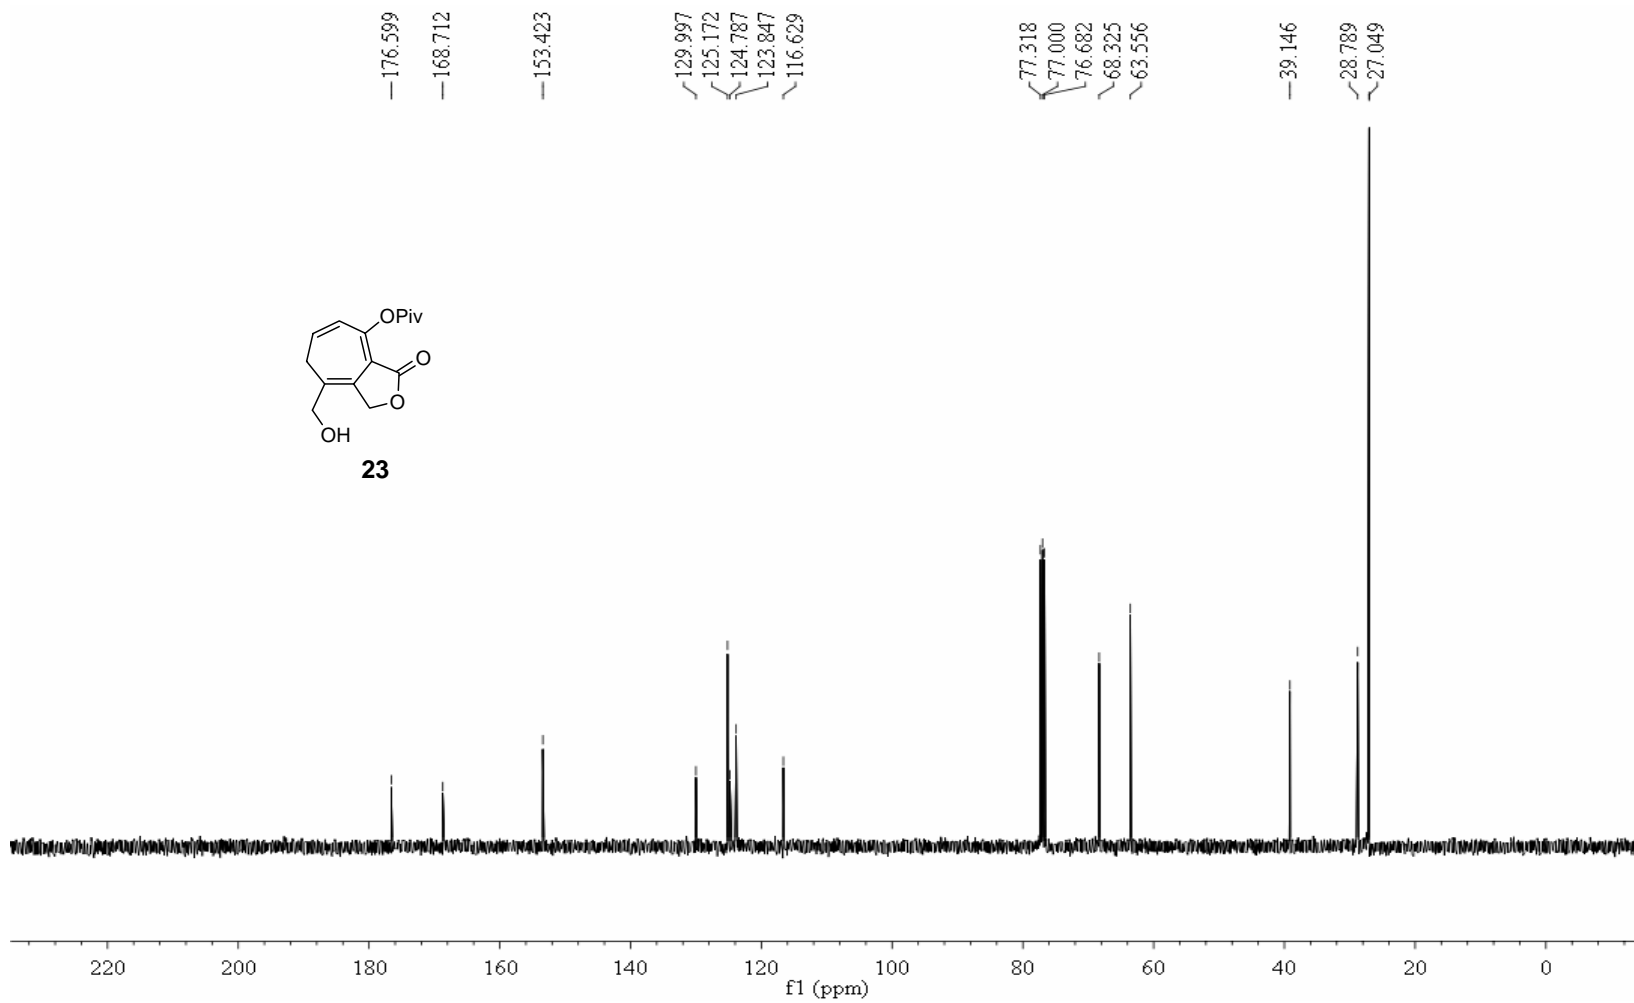



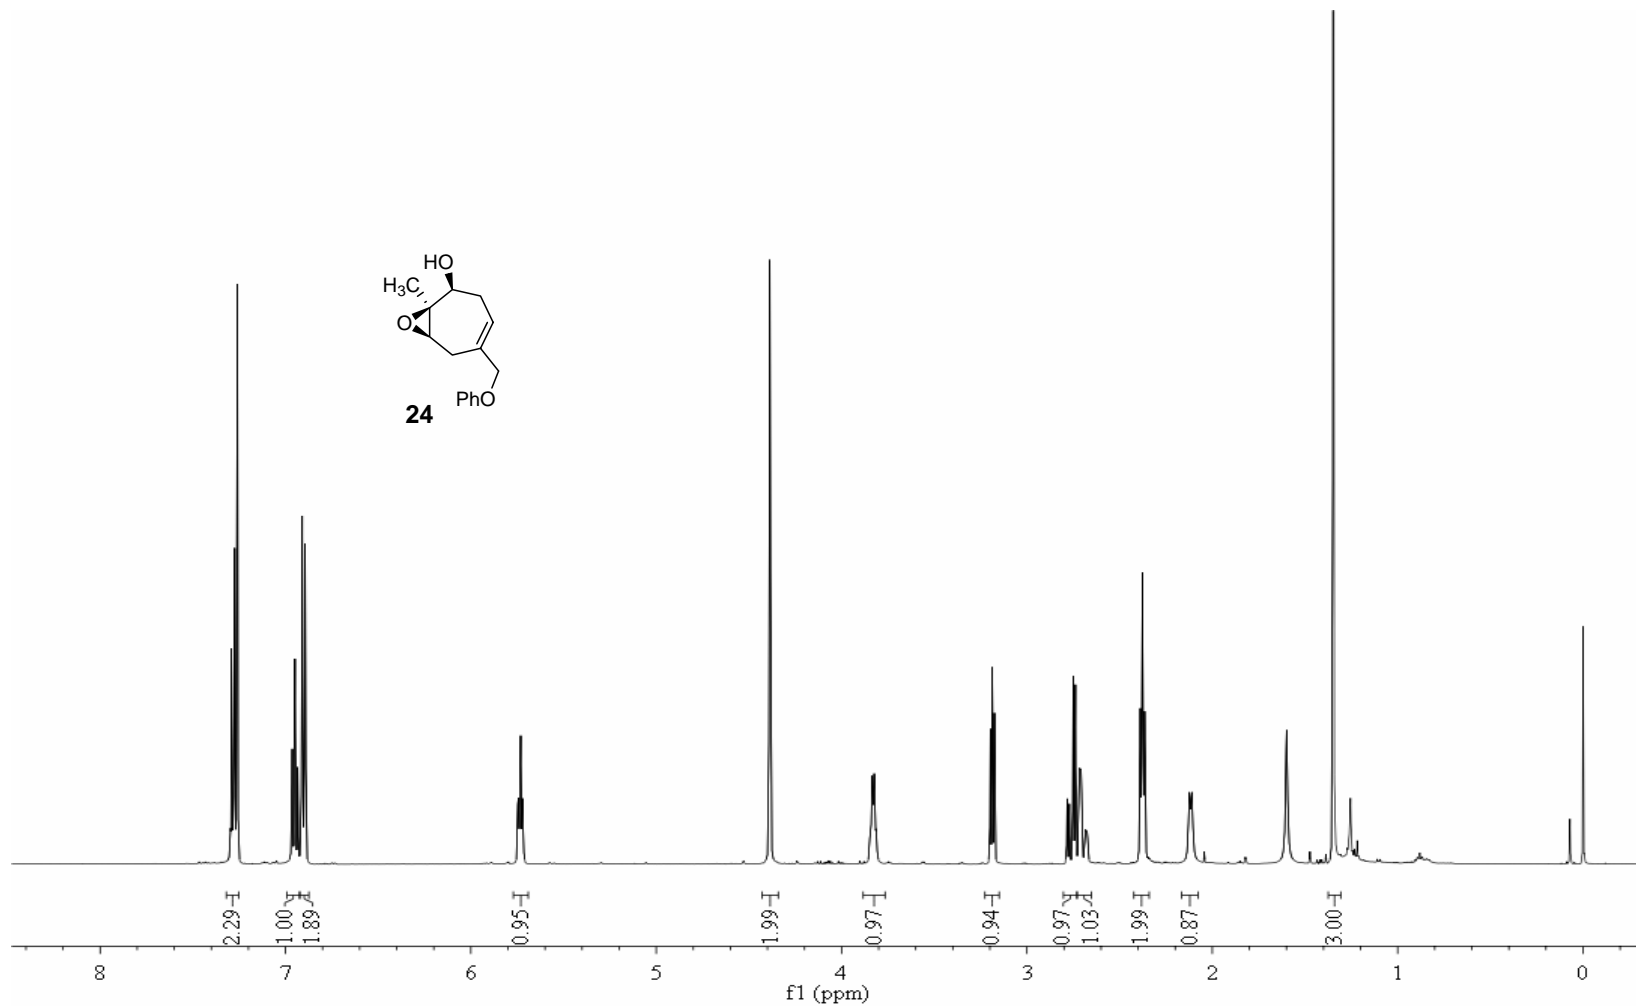

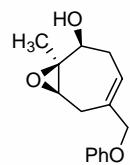

24

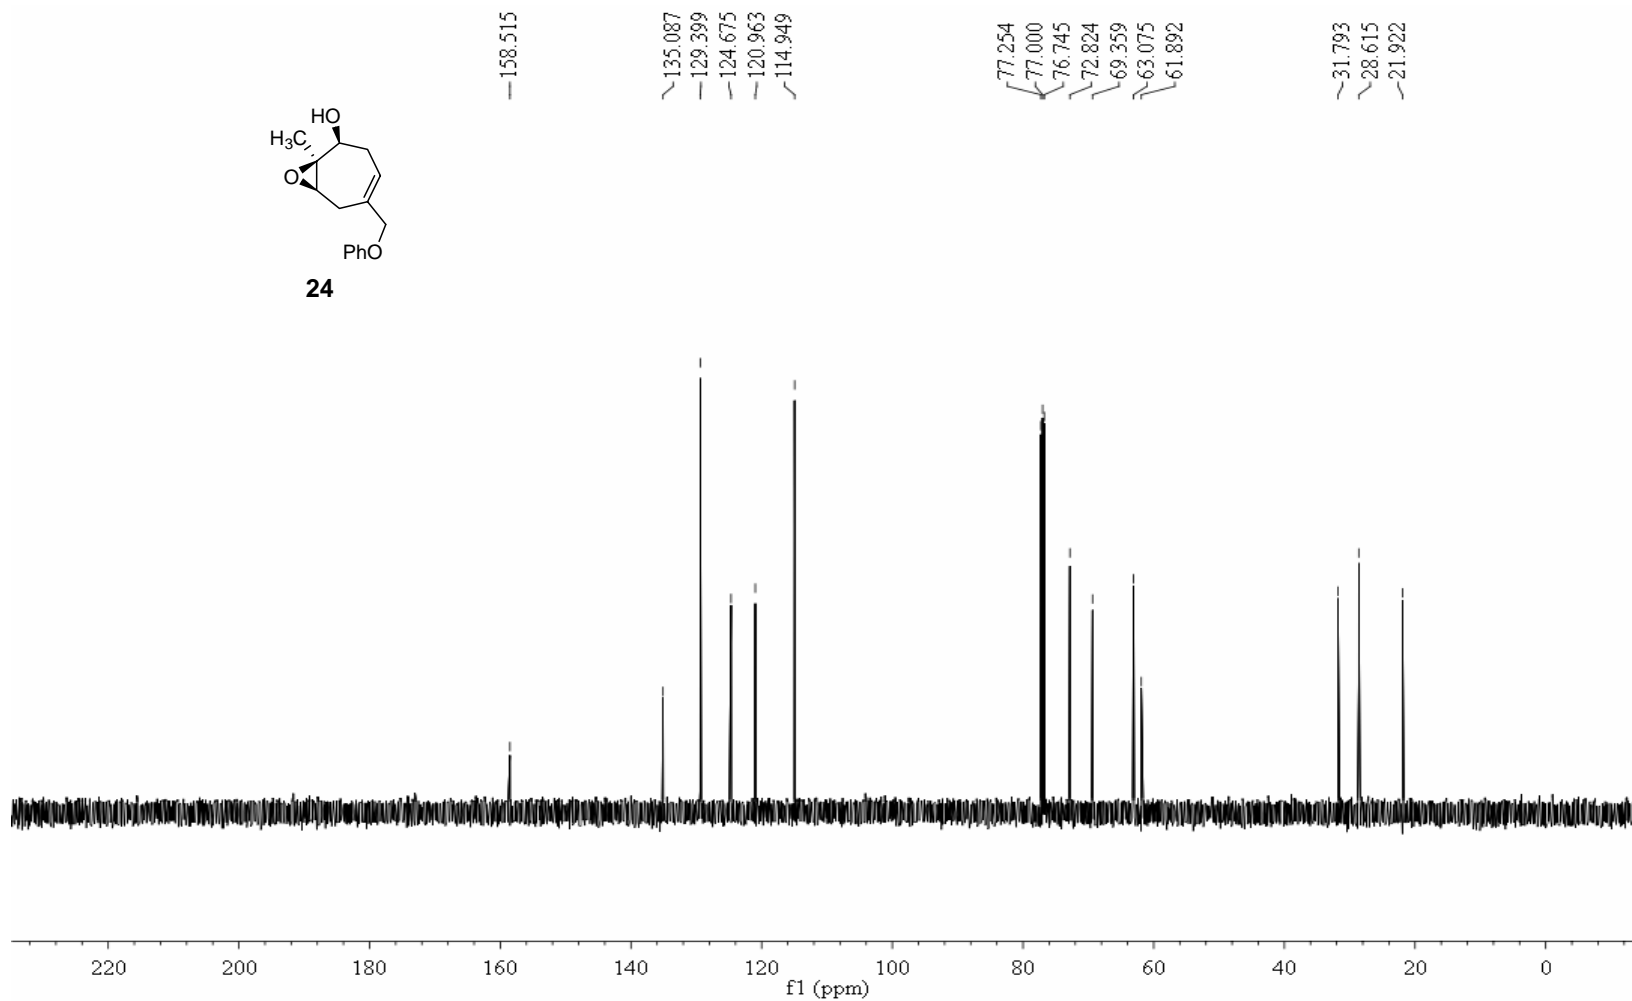

Supplement: NIHMS363515-supplement-1_si_001.pdf [file NIHMS363515-supplement-1_si_001.pdf]
